# Supplementary material for: Redox Balance in Lactobacillus reuteri DSM20016: Roles of Iron-Dependent Alcohol Dehydrogenases in Glucose/ Glycerol Metabolism
Source: PLoS One. 2016 Dec 28;11(12):e0168107. doi: 10.1371/journal.pone.0168107 (PMC5193401; doi:10.1371/journal.pone.0168107)
Supplement: S1 File — (XLS) [file pone.0168107.s005.xls]

Entry	Entry name	Protein names	Gene names	Organism	Length	Mass	
C7XWB8	C7XWB8_9LACO	Aldehyde-alcohol dehydrogenase	adh HMPREF0501_01183	Lactobacillus coleohominis 101-4-CHN	878	96,865	
C0YXC7	C0YXC7_LACRE	Aldehyde-alcohol dehydrogenase	adh2 HMPREF0535_0442	Lactobacillus reuteri MM2-3	878	97,189	
A5VIB7	A5VIB7_LACRD	Aldehyde-alcohol dehydrogenase	Lreu_0321	Lactobacillus reuteri (strain DSM 20016)	878	97,189	ADH6
S5NMR5	S5NMR5_LACRE	Aldehyde-alcohol dehydrogenase	N134_01700	Lactobacillus reuteri TD1	878	97,189	
Q38YP7	Q38YP7_LACSS	Aldehyde-alcohol dehydrogenase	adhE LCA_0379	Lactobacillus sakei subsp. sakei (strain 23K)	864	93,446	
F9ULK9	F9ULK9_LACPL	Aldehyde-alcohol dehydrogenase	adhE lp_3662	Lactobacillus plantarum (strain ATCC BAA-793 / NCIMB 8826 / WCFS1)	867	94,554	
K0N307	K0N307_LACCA	Aldehyde-alcohol dehydrogenase	ADH2 BN194_08400	Lactobacillus casei W56	868	94,545	
D5H1M6	D5H1M6_LACCS	Aldehyde-alcohol dehydrogenase	adhE LCRIS_00464	Lactobacillus crispatus (strain ST1)	874	95,877	
Q5FLS6	Q5FLS6_LACAC	Aldehyde-alcohol dehydrogenase	adhE LBA0461	Lactobacillus acidophilus (strain ATCC 700396 / NCK56 / N2 / NCFM)	876	96,068	
F0NVU0	F0NVU0_LACHH	Aldehyde-alcohol dehydrogenase	adhE LBHH_1636	Lactobacillus helveticus (strain H10)	874	96,183	
C2D282	C2D282_LACBR	Aldehyde-alcohol dehydrogenase	adh2 HMPREF0496_1654	Lactobacillus brevis subsp. gravesensis ATCC 27305	872	95,019	
D0R5P0	D0R5P0_LACJF	Aldehyde-alcohol dehydrogenase	adhE FI9785_1548	Lactobacillus johnsonii (strain FI9785)	869	95,544	
F8DLQ7	F8DLQ7_LACRS	Aldehyde-alcohol dehydrogenase	adh HMPREF0538_21527	Lactobacillus reuteri (strain ATCC 55730 / SD2112)	878	97,196	
G2KV76	G2KV76_LACSM	Aldehyde-alcohol dehydrogenase	adh2 LSA_02080	Lactobacillus sanfranciscensis (strain TMW 1.1304)	878	95,785	
A0A0R1Y0X6	A0A0R1Y0X6_9LACO	Aldehyde-alcohol dehydrogenase	FD34_GL000299	Lactobacillus pontis DSM 8475	876	96,891	
D0DU88	D0DU88_LACFE	Aldehyde-alcohol dehydrogenase	adh HMPREF0513_01227	Lactobacillus fermentum 28-3-CHN	867	94,5	
F0HYH5	F0HYH5_LACDL	Aldehyde-alcohol dehydrogenase	adhE2 FC10_GL001066 HMPREF5505_1974	Lactobacillus delbrueckii subsp. lactis DSM 20072	924	101,866	
M4KEU3	M4KEU3_LACPN	Aldehyde-alcohol dehydrogenase	adhE zj316_0201	Lactobacillus plantarum ZJ316	890	97,325	
A0A0A1H1F7	A0A0A1H1F7_9LACO	Aldehyde-alcohol dehydrogenase	adhE LOOC260_120500	Lactobacillus hokkaidonensis JCM 18461	868	94,665	
J9W8Q0	J9W8Q0_LACBU	Aldehyde-alcohol dehydrogenase	adhE LBUCD034_2244	Lactobacillus buchneri CD034	872	95	
U4TMP8	U4TMP8_9LACO	Aldehyde-alcohol dehydrogenase	adhE L248_2562	Lactobacillus shenzhenensis LY-73	872	94,975	
W5XDK7	W5XDK7_LACHE	Aldehyde-alcohol dehydrogenase	adhE LBH_0396	Lactobacillus helveticus H9	874	96,173	
G6CCA1	G6CCA1_LACCU	Aldehyde-alcohol dehydrogenase	adhE CRL705_27	Lactobacillus curvatus CRL 705	861	93,167	
I9AI41	I9AI41_LACPE	Aldehyde-alcohol dehydrogenase	adhE KCA1_3001	Lactobacillus pentosus KCA1	867	94,716	
C5FAC3	C5FAC3_LACPA	Aldehyde-alcohol dehydrogenase	LBPG_02839	Lactobacillus paracasei subsp. paracasei 8700:2	868	94,545	
C0WQT0	C0WQT0_LACBU	Aldehyde-alcohol dehydrogenase	adh2 HMPREF0497_1483	Lactobacillus buchneri ATCC 11577	872	95,017	
C0WVI9	C0WVI9_LACFE	Aldehyde-alcohol dehydrogenase	adh2 HMPREF0511_0140	Lactobacillus fermentum ATCC 14931	867	94,528	
C8PCZ2	C8PCZ2_9LACO	Aldehyde-alcohol dehydrogenase	aad FC42_GL001103 HMPREF0520_0962	Lactobacillus iners DSM 13335	864	94,872	
E3C878	E3C878_9LACO	Aldehyde-alcohol dehydrogenase	adh HMPREF9265_1498	Lactobacillus oris PB013-T2-3	878	96,813	
C2E4S8	C2E4S8_LACJH	Aldehyde-alcohol dehydrogenase	adh2 FC22_GL000392 HMPREF0528_0752	Lactobacillus johnsonii ATCC 33200	869	95,547	
E7FM75	E7FM75_9LACO	Aldehyde-alcohol dehydrogenase	adhE HMPREF0542_10002	Lactobacillus ruminis ATCC 25644	898	98,618	
E3BSY1	E3BSY1_9LACO	Aldehyde-alcohol dehydrogenase	adh HMPREF9216_1344	Lactobacillus iners LEAF 2053A-b	864	94,849	
E1NPW8	E1NPW8_9LACO	Aldehyde-alcohol dehydrogenase	adh HMPREF9212_0529	Lactobacillus iners LactinV 03V1-b	864	94,919	
E1NTR0	E1NTR0_9LACO	Aldehyde-alcohol dehydrogenase	adh HMPREF9211_1418	Lactobacillus iners LactinV 01V1-a	864	94,873	
S2UWA5	S2UWA5_LACPA	Aldehyde-alcohol dehydrogenase	Lpp70_05818	Lactobacillus paracasei subsp. paracasei Lpp70	868	94,545	
S2T8X5	S2T8X5_LACPA	Aldehyde-alcohol dehydrogenase	Lpp43_02757	Lactobacillus paracasei subsp. paracasei Lpp43	868	94,545	
S2SRQ3	S2SRQ3_LACPA	Aldehyde-alcohol dehydrogenase	Lpp49_03896	Lactobacillus paracasei subsp. paracasei Lpp49	868	94,545	
S2LGQ1	S2LGQ1_LACPA	Aldehyde-alcohol dehydrogenase	Lpl7_1491	Lactobacillus paracasei subsp. tolerans Lpl7	868	94,545	
S2NNA9	S2NNA9_LACPA	Aldehyde-alcohol dehydrogenase	Lpp225_2523	Lactobacillus paracasei subsp. paracasei Lpp225	868	94,545	
A0A0E1PFU0	A0A0E1PFU0_LACPA	Aldehyde-alcohol dehydrogenase	LBPC_0701	Lactobacillus paracasei subsp. paracasei JCM 8130	868	94,545	
S2PH47	S2PH47_LACPA	Aldehyde-alcohol dehydrogenase	Lpp74_06961	Lactobacillus paracasei subsp. paracasei Lpp74	868	94,545	
S2PDW2	S2PDW2_LACPA	Aldehyde-alcohol dehydrogenase	Lpp7_09813	Lactobacillus paracasei subsp. paracasei Lpp7	868	94,545	
S2QAV4	S2QAV4_LACPA	Aldehyde-alcohol dehydrogenase	Lpp77_02397	Lactobacillus paracasei subsp. paracasei CNCM I-4270	868	94,545	
A0A0E1XXA1	A0A0E1XXA1_9LACO	Aldehyde-alcohol dehydrogenase	adh HMPREF9217_0687	Lactobacillus iners LEAF 2052A-d	864	94,821	
S4ZKF3	S4ZKF3_LACCA	Aldehyde-alcohol dehydrogenase	LOCK919_0877	Lactobacillus casei LOCK919	868	94,545	
S2SYT9	S2SYT9_LACPA	Aldehyde-alcohol dehydrogenase	Lpp124_01264	Lactobacillus paracasei subsp. paracasei CNCM I-4649	868	94,535	
S2MBN9	S2MBN9_LACPA	Aldehyde-alcohol dehydrogenase	Lpp22_1952	Lactobacillus paracasei subsp. paracasei Lpp22	903	98,735	
A0A061CUY7	A0A061CUY7_LACDL	Aldehyde-alcohol dehydrogenase	acdH LBCNRZ226_09020	Lactobacillus delbrueckii subsp. lactis	900	99,001	
B2GAD1	B2GAD1_LACF3	Aldehyde-alcohol dehydrogenase	LAF_0277	Lactobacillus fermentum (strain NBRC 3956 / LMG 18251)	867	94,528	
E4SZ07	E4SZ07_LACDN	Aldehyde-alcohol dehydrogenase	LDBND_0837	Lactobacillus delbrueckii subsp. bulgaricus (strain ND02)	924	101,889	
Q03B11	Q03B11_LACC3	Aldehyde-alcohol dehydrogenase	LSEI_0775	Lactobacillus casei (strain ATCC 334)	868	94,545	
C2FDU7	C2FDU7_LACPA	Aldehyde-alcohol dehydrogenase	HMPREF0530_1755	Lactobacillus paracasei subsp. paracasei ATCC 25302	882	96,147	
C7TAK9	C7TAK9_LACRG	Aldehyde-alcohol dehydrogenase	LRHM_0735	Lactobacillus rhamnosus (strain ATCC 53103 / GG)	868	94,581	
D8IGS0	D8IGS0_LACFC	Aldehyde-alcohol dehydrogenase	LC40_0201	Lactobacillus fermentum (strain CECT 5716)	867	94,528	
Q74I02	Q74I02_LACJO	Aldehyde-alcohol dehydrogenase	LJ_1766	Lactobacillus johnsonii (strain CNCM I-12250 / La1 / NCC 533)	869	95,532	
K6QUF8	K6QUF8_LACCA	Aldehyde-alcohol dehydrogenase	LCA211_0757	Lactobacillus casei 21/1	868	94,545	
K6RFX0	K6RFX0_LACCA	Aldehyde-alcohol dehydrogenase	LCAM36_1185	Lactobacillus casei M36	868	94,545	
R9GCJ4	R9GCJ4_LACSK	Aldehyde-alcohol dehydrogenase	LS25_0425	Lactobacillus sakei subsp. sakei LS25	864	93,446	
K6QMI2	K6QMI2_LACCA	Aldehyde-alcohol dehydrogenase	LCA32G_1097	Lactobacillus casei 32G	868	94,545	
A0A0E2BTX1	A0A0E2BTX1_LACCA	Aldehyde-alcohol dehydrogenase	LCAA2362_2243	Lactobacillus casei A2-362	868	94,545	
J3JAV8	J3JAV8_9LACO	Aldehyde-alcohol dehydrogenase	A11Y_118104	Lactobacillus coryniformis subsp. coryniformis CECT 5711	873	95,886	
D8FMH1	D8FMH1_LACDE	Aldehyde-alcohol dehydrogenase	HMPREF9264_1432	Lactobacillus delbrueckii subsp. bulgaricus PB2003/044-T3-4	924	101,898	
A0A0C9Q566	A0A0C9Q566_LACPA	Aldehyde-alcohol dehydrogenase	LC1981_1240	Lactobacillus paracasei NRIC 1981	868	94,571	
F4FV24	F4FV24_LACBN	Aldehyde-alcohol dehydrogenase	Lbuc_2143	Lactobacillus buchneri (strain NRRL B-30929)	872	95	
Q1WQZ1	Q1WQZ1_LACS1	Aldehyde-alcohol dehydrogenase	LSL_1901	Lactobacillus salivarius (strain UCC118)	885	97,255	
A0A0R2E894	A0A0R2E894_LACPA	Aldehyde-alcohol dehydrogenase	FC12_GL002072	Lactobacillus paracasei subsp. tolerans DSM 20258	882	96,087	
K6RZ99	K6RZ99_LACCA	Aldehyde-alcohol dehydrogenase	LCAUCD174_0780	Lactobacillus casei UCD174	868	94,591	
A0A0C9QDI7	A0A0C9QDI7_LACPA	Aldehyde-alcohol dehydrogenase	LC0644_2411	Lactobacillus paracasei NRIC 0644	868	94,545	
K6SFB2	K6SFB2_LACCA	Aldehyde-alcohol dehydrogenase	LCAUW4_0677	Lactobacillus casei UW4	868	94,591	
S6C9F9	S6C9F9_LACCA	Aldehyde-alcohol dehydrogenase	LBCZ_0554	Lactobacillus casei subsp. casei ATCC 393	868	94,493	
F8KG51	F8KG51_LACRE	Aldehyde-alcohol dehydrogenase	LRATCC53608_1697	Lactobacillus reuteri ATCC 53608	878	97,183	
A0A0E2LXG9	A0A0E2LXG9_LACCA	Aldehyde-alcohol dehydrogenase	N422_09395	Lactobacillus casei 5b	868	94,559	
E4SLU5	E4SLU5_LACAR	Aldehyde-alcohol dehydrogenase	LA2_02445	Lactobacillus amylovorus (strain GRL 1112)	875	96,112	
F6CBU5	F6CBU5_LACKZ	Aldehyde-alcohol dehydrogenase	WANG_1197	Lactobacillus kefiranofaciens (strain ZW3)	875	96,197	
V5P4C3	V5P4C3_LACJH	Aldehyde-alcohol dehydrogenase	T285_07615	Lactobacillus johnsonii N6.2	869	95,661	
A0A0D5MKD0	A0A0D5MKD0_LACHE	Aldehyde-alcohol dehydrogenase	HUO_09665	Lactobacillus helveticus (Lactobacillus suntoryeus)	874	96,197	
Q03U32	Q03U32_LACBA	Aldehyde-alcohol dehydrogenase	LVIS_0119	Lactobacillus brevis (strain ATCC 367 / JCM 1170)	872	95,265	
B3XQQ5	B3XQQ5_LACRE	Aldehyde-alcohol dehydrogenase	Lreu23DRAFT_3367	Lactobacillus reuteri 100-23	878	97,185	
F2M2P3	F2M2P3_LACAL	Aldehyde-alcohol dehydrogenase	LAB52_02255	Lactobacillus amylovorus (strain GRL 1118)	875	96,042	
M5J737	M5J737_9LACO	Aldehyde-alcohol dehydrogenase	D271_02589	Lactobacillus saerimneri 30a	859	93,253	
A0A0H0YJY7	A0A0H0YJY7_LACCA	Aldehyde-alcohol dehydrogenase	AAW28_11180	Lactobacillus casei	868	94,474	
A0A0N6WH00	A0A0N6WH00_LACFE	Aldehyde-alcohol dehydrogenase	N573_001645	Lactobacillus fermentum 3872	867	94,528	
V7HTA2	V7HTA2_9LACO	Aldehyde-alcohol dehydrogenase	LEQ_0150	Lactobacillus equi DPC 6820	890	96,839	
R9X6E9	R9X6E9_LACPN	Aldehyde-alcohol dehydrogenase	Lp16_2819	Lactobacillus plantarum 16	867	94,554	
A0A0D4CLZ8	A0A0D4CLZ8_9LACO	Aldehyde-alcohol dehydrogenase	LBLM1_09530	Lactobacillus mucosae LM1	879	96,656	
G2SM17	G2SM17_LACRR	Aldehyde-alcohol dehydrogenase	LRC_17730	Lactobacillus ruminis (strain ATCC 27782 / RF3)	898	98,69	
F4ACG6	F4ACG6_LACJH	Aldehyde-alcohol dehydrogenase	LJP_1525c	Lactobacillus johnsonii DPC 6026	869	95,676	
A0A0F7CZY3	A0A0F7CZY3_LACHE	Aldehyde-alcohol dehydrogenase	TU99_02450	Lactobacillus helveticus (Lactobacillus suntoryeus)	874	96,18	
A0A0R1F7G3	A0A0R1F7G3_9LACO	Aldehyde-alcohol dehydrogenase	FD22_GL000878	Lactobacillus coryniformis subsp. coryniformis KCTC 3167 = DSM 20001	873	95,872	
A0A0R1JZ92	A0A0R1JZ92_9LACO	Aldehyde-alcohol dehydrogenase	FC16_GL000282	Lactobacillus coryniformis subsp. torquens DSM 20004 = KCTC 3535	873	95,902	
A0A0R1JG79	A0A0R1JG79_LACSK	Aldehyde-alcohol dehydrogenase	FD49_GL001662	Lactobacillus sakei subsp. sakei DSM 20017 = JCM 1157	864	93,504	
A0A0R1SNI6	A0A0R1SNI6_LACSK	Aldehyde-alcohol dehydrogenase	FC71_GL000628	Lactobacillus sakei subsp. carnosus DSM 15831	864	93,476	
F7QZV5	F7QZV5_9LACO	Aldehyde-alcohol dehydrogenase	LRU_00959	Lactobacillus ruminis SPM0211	898	98,689	
R9WIU8	R9WIU8_LACRE	Aldehyde-alcohol dehydrogenase	LRI_1617	Lactobacillus reuteri I5007	878	97,183	
M5AAG2	M5AAG2_LACBR	Aldehyde-alcohol dehydrogenase	LVISKB_0118	Lactobacillus brevis KB290	891	97,451	
E1JMB6	E1JMB6_9LACO	Aldehyde-alcohol dehydrogenase	HMPREF9269_0220	Lactobacillus salivarius ACS-116-V-Col5a	885	97,254	
R4RUT8	R4RUT8_LACFE	Aldehyde-alcohol dehydrogenase	LBFF_0296	Lactobacillus fermentum F-6	867	94,544	
K0NGK9	K0NGK9_9LACO	Aldehyde-alcohol dehydrogenase	BN146_09760	Lactobacillus equicursoris 66c	878	96,487	
A0A0R1WSV1	A0A0R1WSV1_9LACO	Aldehyde-alcohol dehydrogenase	FC93_GL001165	Lactobacillus kefiranofaciens subsp. kefiranofaciens DSM 5016 = JCM 6985	875	96,197	
A0A0R1PLG4	A0A0R1PLG4_9LACO	Aldehyde-alcohol dehydrogenase	FC94_GL001890	Lactobacillus kefiranofaciens subsp. kefirgranum DSM 10550 = JCM 8572	875	96,189	
A0A0R1ETH8	A0A0R1ETH8_LACZE	Aldehyde-alcohol dehydrogenase	FD51_GL002481	Lactobacillus zeae DSM 20178 = KCTC 3804	882	96,068	
A0A0R1V165	A0A0R1V165_LACPN	Aldehyde-alcohol dehydrogenase	FD10_GL002303	Lactobacillus plantarum subsp. argentoratensis DSM 16365	890	97,315	
A0A0R1F3M2	A0A0R1F3M2_LACCA	Aldehyde-alcohol dehydrogenase	FC13_GL000428	Lactobacillus casei DSM 20011 = JCM 1134	882	96,147	
A4ZH65	A4ZH65_LACHE	Aldehyde-alcohol dehydrogenase		Lactobacillus helveticus CNRZ32	874	96,216	
J3WPC6	J3WPC6_LACHE	Aldehyde-alcohol dehydrogenase	R0052_09445	Lactobacillus helveticus R0052	874	96,203	
H4GKK1	H4GKK1_9LACO	Aldehyde-alcohol dehydrogenase	PS3_6961	Lactobacillus gastricus PS3	869	94,975	
V4ZHX9	V4ZHX9_LACFE	Aldehyde-alcohol dehydrogenase	NB22_02465	Lactobacillus fermentum NB-22	867	94,5	
U6FU07	U6FU07_LACHE	Aldehyde-alcohol dehydrogenase	LHCIRMBIA101_01944	Lactobacillus helveticus CIRM-BIA 101	874	96,216	
U6FFS4	U6FFS4_LACHE	Aldehyde-alcohol dehydrogenase	LHCIRMBIA103_00630	Lactobacillus helveticus CIRM-BIA 103	874	96,216	
U6F896	U6F896_LACHE	Aldehyde-alcohol dehydrogenase	LHCIRMBIA104_00023	Lactobacillus helveticus CIRM-BIA 104	874	96,216	
A0A0N9ZD00	A0A0N9ZD00_LACHE	Aldehyde-alcohol dehydrogenase	ALV80_08790	Lactobacillus helveticus (Lactobacillus suntoryeus)	874	96,217	
J1F5B7	J1F5B7_9LACO	Aldehyde-alcohol dehydrogenase	FD00_GL002324 LMA_01019	Lactobacillus mali KCTC 3596 = DSM 20444	896	98,026	
W6T4P0	W6T4P0_9LACO	Aldehyde-alcohol dehydrogenase	LFAB_15320	Lactobacillus fabifermentans T30PCM01	867	94,642	
U2XIW0	U2XIW0_LACPN	Aldehyde-alcohol dehydrogenase	N644_0906	Lactobacillus plantarum AY01	867	94,582	
I7K0U4	I7K0U4_9LACO	Aldehyde-alcohol dehydrogenase	BN52_02235	Lactobacillus gigeriorum DSM 23908 = CRBIP 24.85	871	95,42	
T0SIP0	T0SIP0_LACFE	Aldehyde-alcohol dehydrogenase	N219_01700	Lactobacillus fermentum MTCC 8711	867	94,548	
K8QQY4	K8QQY4_LACRH	Aldehyde-alcohol dehydrogenase	LRHMDP2_421	Lactobacillus rhamnosus LRHMDP2	868	94,553	
T5JT01	T5JT01_LACPN	Aldehyde-alcohol dehydrogenase	N692_13570	Lactobacillus plantarum EGD-AQ4	867	94,686	
U6F8A7	U6F8A7_LACHE	Aldehyde-alcohol dehydrogenase	LHCIRMBIA951_01854	Lactobacillus helveticus CIRM-BIA 951	874	96,281	
V6DHT4	V6DHT4_9LACO	Aldehyde-alcohol dehydrogenase	LSCP400_00271	Lactobacillus salivarius cp400	885	97,285	
V5GDR7	V5GDR7_9LACO	Aldehyde-alcohol dehydrogenase	Lc367_0364	Lactobacillus crispatus EM-LC1	874	95,973	
A0A081BKT1	A0A081BKT1_9LACO	Aldehyde-alcohol dehydrogenase	LOSG293_440060	Lactobacillus oryzae JCM 18671	871	95,268	
F7SFA8	F7SFA8_LACJH	Aldehyde-alcohol dehydrogenase	PF01_01235	Lactobacillus johnsonii pf01	869	95,646	
U4QLV4	U4QLV4_LACHE	Aldehyde-alcohol dehydrogenase	LHCIRMBIA953_01392	Lactobacillus helveticus CIRM-BIA 953	874	96,236	
A0A0A7U3R2	A0A0A7U3R2_LACBR	Aldehyde-alcohol dehydrogenase	L747_10735	Lactobacillus brevis BSO 464	872	95,236	
F7QWL9	F7QWL9_9LACO	Aldehyde-alcohol dehydrogenase	LSGJ_01698	Lactobacillus salivarius GJ-24	885	97,283	
A0A0P7I5I2	A0A0P7I5I2_LACPN	Aldehyde-alcohol dehydrogenase	WJL_0360	Lactobacillus plantarum WJL	867	94,57	
A0A0F7PVZ0	A0A0F7PVZ0_9LACO	Aldehyde-alcohol dehydrogenase	LsR_01799	Lactobacillus salivarius str. Ren	885	97,283	
H7G1K9	H7G1K9_9LACO	Aldehyde-alcohol dehydrogenase	SMXD51_08639	Lactobacillus salivarius SMXD51	885	97,257	
F5VG91	F5VG91_9LACO	Aldehyde-alcohol dehydrogenase	NIAS840_01811	Lactobacillus salivarius NIAS840	885	97,26	
A0A0K1L2V8	A0A0K1L2V8_LACPA	Aldehyde-alcohol dehydrogenase	AKG30_03300	Lactobacillus paracasei	868	94,59	
A0A023MDE9	A0A023MDE9_LACPN	Aldehyde-alcohol dehydrogenase	I526_2968	Lactobacillus plantarum DOMLa	867	94,554	
A0A0R2ME66	A0A0R2ME66_LACHE	Aldehyde-alcohol dehydrogenase	IV62_GL001692	Lactobacillus helveticus (Lactobacillus suntoryeus)	874	96,248	
A0A0L0TI18	A0A0L0TI18_9LACO	Aldehyde-alcohol dehydrogenase	LDS38_04445	Lactobacillus delbrueckii subsp. sunkii	900	98,945	
A0A0H4LPA0	A0A0H4LPA0_9LACO	Aldehyde-alcohol dehydrogenase	ABB44_00595 ABB45_00595 NBRC111452_1841	Lactobacillus farciminis	872	95,15	
F6IUK2	F6IUK2_LACPE	Aldehyde-alcohol dehydrogenase	LPE_01273	Lactobacillus pentosus MP-10	867	94,716	
G0M4G9	G0M4G9_LACPE	Aldehyde-alcohol dehydrogenase	LPENT_01786	Lactobacillus pentosus IG1	867	94,702	
F0TJ00	F0TJ00_LACAM	Aldehyde-alcohol dehydrogenase	LAC30SC_02385	Lactobacillus amylovorus	875	95,95	
H1LC57	H1LC57_9LACO	Aldehyde-alcohol dehydrogenase	HMPREF9104_00170	Lactobacillus kisonensis F0435	851	92,865	
N1ZSE5	N1ZSE5_9LACO	Aldehyde-alcohol dehydrogenase	C822_01393	Lactobacillus murinus ASF361	896	97,923	
A0A0A8AZ91	A0A0A8AZ91_LACGS	Aldehyde-alcohol dehydrogenase	P906_01990	Lactobacillus gasseri 130918	869	95,504	
G9ZP24	G9ZP24_9LACO	Aldehyde-alcohol dehydrogenase	HMPREF9103_01478	Lactobacillus parafarraginis F0439	872	94,769	
A0A023CXM1	A0A023CXM1_9LACO	Aldehyde-alcohol dehydrogenase	FD15_GL000645	Lactobacillus sucicola DSM 21376 = JCM 15457	897	98,304	
A4L2U7	A4L2U7_LACRE	Aldehyde-alcohol dehydrogenase	lr1777	Lactobacillus reuteri	878	97,196	
A0A098R4F8	A0A098R4F8_9LACO	Aldehyde-alcohol dehydrogenase	ASU28_14420 HR47_10725	Lactobacillus paraplantarum	867	94,598	
A0A098QZH2	A0A098QZH2_LACRE	Aldehyde-alcohol dehydrogenase	HN00_00390	Lactobacillus reuteri	878	97,189	
A0A0R1R9P6	A0A0R1R9P6_9LACO	Aldehyde-alcohol dehydrogenase	FD35_GL000839	Lactobacillus rossiae DSM 15814	878	95,607	
A0A0R1XZQ7	A0A0R1XZQ7_9LACO	Aldehyde-alcohol dehydrogenase	FC83_GL000332	Lactobacillus composti DSM 18527 = JCM 14202	874	94,815	
A0A0R1ZXK4	A0A0R1ZXK4_9LACO	Aldehyde-alcohol dehydrogenase	FC30_GL001674	Lactobacillus animalis KCTC 3501 = DSM 20602	896	97,912	
A0A0R1H2M0	A0A0R1H2M0_9LACO	Aldehyde-alcohol dehydrogenase	FC07_GL001093	Lactobacillus bifermentans DSM 20003	870	95,459	
A0A0R1XIQ0	A0A0R1XIQ0_9LACO	Aldehyde-alcohol dehydrogenase	FD32_GL001358	Lactobacillus panis DSM 6035	879	96,987	
A0A0R1JPC5	A0A0R1JPC5_9LACO	Aldehyde-alcohol dehydrogenase	FD30_GL000912	Lactobacillus namurensis DSM 19117	870	95,215	
A0A0R1MZB8	A0A0R1MZB8_9LACO	Aldehyde-alcohol dehydrogenase	FD09_GL002412	Lactobacillus perolens DSM 12744	872	95,208	
A0A0R1JDY1	A0A0R1JDY1_LACBU	Aldehyde-alcohol dehydrogenase	FC79_GL001690	Lactobacillus buchneri DSM 20057	872	95	
A0A0R1PI03	A0A0R1PI03_9LACO	Aldehyde-alcohol dehydrogenase	FD33_GL001196	Lactobacillus paralimentarius DSM 13238 = JCM 10415	872	95,237	
A0A0R1JUE6	A0A0R1JUE6_9LACO	Aldehyde-alcohol dehydrogenase	FD02_GL000406	Lactobacillus nasuensis JCM 17158	870	94,073	
A0A0R1USS7	A0A0R1USS7_9LACO	Aldehyde-alcohol dehydrogenase	FD28_GL001864	Lactobacillus hammesii DSM 16381	872	95,408	
A0A0R1NAV4	A0A0R1NAV4_9LACO	Aldehyde-alcohol dehydrogenase	FD12_GL001924	Lactobacillus rapi DSM 19907 = JCM 15042	874	95,166	
A0A0R1RVT2	A0A0R1RVT2_9LACO	Aldehyde-alcohol dehydrogenase	FC69_GL000424	Lactobacillus fuchuensis DSM 14340 = JCM 11249	864	93,966	
A0A0R1TN87	A0A0R1TN87_9LACO	Aldehyde-alcohol dehydrogenase	FC36_GL000054	Lactobacillus equi DSM 15833 = JCM 10991	890	96,866	
A0A0R1SS77	A0A0R1SS77_9LACO	Aldehyde-alcohol dehydrogenase	FC85_GL001479	Lactobacillus diolivorans DSM 14421	870	94,716	
A0A0R1LEA7	A0A0R1LEA7_9LACO	Aldehyde-alcohol dehydrogenase	FD25_GL000960	Lactobacillus acidifarinae DSM 19394	871	94,897	
A0A0R1LPJ5	A0A0R1LPJ5_9LACO	Aldehyde-alcohol dehydrogenase	FD25_GL000959	Lactobacillus acidifarinae DSM 19394	872	94,624	
A0A0R1T0E8	A0A0R1T0E8_9LACO	Aldehyde-alcohol dehydrogenase	FD08_GL002208	Lactobacillus parakefiri DSM 10551	869	94,758	
A0A0R1K9H2	A0A0R1K9H2_9LACO	Aldehyde-alcohol dehydrogenase	FD03_GL002235	Lactobacillus nodensis DSM 19682 = JCM 14932 = NBRC 107160	868	94,805	
A0A0R1W883	A0A0R1W883_9LACO	Aldehyde-alcohol dehydrogenase	FD16_GL000198	Lactobacillus suebicus DSM 5007 = KCTC 3549	870	95,147	
A0A0R1W1U6	A0A0R1W1U6_9LACO	Aldehyde-alcohol dehydrogenase	FD16_GL000503	Lactobacillus suebicus DSM 5007 = KCTC 3549	867	95,079	
A0A0R1QS38	A0A0R1QS38_9LACO	Aldehyde-alcohol dehydrogenase	FD37_GL002346	Lactobacillus spicheri DSM 15429	869	94,901	
A0A0R1L6N3	A0A0R1L6N3_9LACO	Aldehyde-alcohol dehydrogenase	FC99_GL002370	Lactobacillus koreensis JCM 16448	872	95,263	
A0A0R2BV09	A0A0R2BV09_LACSD	Aldehyde-alcohol dehydrogenase	FD36_GL000391	Lactobacillus sanfranciscensis (strain ATCC 27651 / DSM 20451 / JCM 5668 / KCTC 3205 / NCIMB 702811 / NRRL B-3934 / L-12)	871	94,862	
A0A0R2JS23	A0A0R2JS23_9LACO	Aldehyde-alcohol dehydrogenase	IV52_GL000939	Lactobacillus lindneri DSM 20690 = JCM 11027	878	95,6	
A0A0R2BPA7	A0A0R2BPA7_9LACO	Aldehyde-alcohol dehydrogenase	FC48_GL001601	Lactobacillus murinus DSM 20452 = NBRC 14221	896	98,051	
A0A0R1VZ72	A0A0R1VZ72_9LACO	Aldehyde-alcohol dehydrogenase	FD41_GL001999	Lactobacillus farraginis DSM 18382 = JCM 14108	872	94,927	
A0A0R1ZSU7	A0A0R1ZSU7_9LACO	Aldehyde-alcohol dehydrogenase	FC95_GL000652	Lactobacillus kefiri DSM 20587 = JCM 5818	869	94,758	
U2PPB8	U2PPB8_LACBR	Aldehyde-alcohol dehydrogenase	HMPREF0495_00240	Lactobacillus brevis ATCC 14869 = DSM 20054	891	97,442	
A0A0R1P794	A0A0R1P794_9LACO	Aldehyde-alcohol dehydrogenase	FD27_GL000067	Lactobacillus frumenti DSM 13145	875	96,385	
A0A0R1ZWC8	A0A0R1ZWC8_9LACO	Aldehyde-alcohol dehydrogenase	FD44_GL000294	Lactobacillus malefermentans DSM 5705 = KCTC 3548	871	95,418	
A0A0R1WJF9	A0A0R1WJF9_9LACO	Aldehyde-alcohol dehydrogenase	FD31_GL002485	Lactobacillus nantensis DSM 16982	869	94,611	
A0A0R2NMJ4	A0A0R2NMJ4_9LACO	Aldehyde-alcohol dehydrogenase	DY78_GL000458	Lactobacillus fabifermentans DSM 21115	867	94,642	
A0A0R1HUM6	A0A0R1HUM6_9LACO	Aldehyde-alcohol dehydrogenase	FC97_GL001847	Lactobacillus paralimentarius DSM 13961 = JCM 10707	872	95,223	
A0A0R1P5Y1	A0A0R1P5Y1_9LACO	Aldehyde-alcohol dehydrogenase	FC47_GL000043	Lactobacillus mucosae DSM 13345	879	96,642	
A0A0R1U9A7	A0A0R1U9A7_9LACO	Aldehyde-alcohol dehydrogenase	FC43_GL001492	Lactobacillus ingluviei DSM 15946	871	94,455	
A0A0R2CKP5	A0A0R2CKP5_9LACO	Aldehyde-alcohol dehydrogenase	FC87_GL001218	Lactobacillus florum DSM 22689 = JCM 16035	869	94,944	
A0A0R2MWU1	A0A0R2MWU1_9LACO	Aldehyde-alcohol dehydrogenase	IV56_GL001770	Lactobacillus saniviri JCM 17471 = DSM 24301	871	94,84	
A0A0R1TX02	A0A0R1TX02_9LACO	Aldehyde-alcohol dehydrogenase	FC32_GL000235	Lactobacillus apodemi DSM 16634 = JCM 16172	896	97,952	
A0A0R1L6D5	A0A0R1L6D5_9LACO	Aldehyde-alcohol dehydrogenase	FD17_GL000806	Lactobacillus sunkii DSM 19904	872	95,009	
A0A0R1MHR7	A0A0R1MHR7_9LACO	Aldehyde-alcohol dehydrogenase	FD38_GL000114	Lactobacillus zymae DSM 19395	871	94,939	
A0A0R1MAE9	A0A0R1MAE9_9LACO	Aldehyde-alcohol dehydrogenase	FC92_GL001540	Lactobacillus hordei DSM 19519	896	98,216	
A0A0R1KJM8	A0A0R1KJM8_9LACO	Aldehyde-alcohol dehydrogenase	FC78_GL001472	Lactobacillus paralimentarius DSM 19674	872	95,368	
A0A0R1RPY7	A0A0R1RPY7_9LACO	Aldehyde-alcohol dehydrogenase	FC70_GL001048	Lactobacillus oligofermentans DSM 15707 = LMG 22743	867	94,981	
A0A0R1XHT4	A0A0R1XHT4_9LACO	Aldehyde-alcohol dehydrogenase	FC65_GL002261	Lactobacillus acidipiscis DSM 15836	893	98,294	
A0A0R1X2D7	A0A0R1X2D7_9LACO	Aldehyde-alcohol dehydrogenase	FC90_GL000533	Lactobacillus graminis DSM 20719	862	93,074	
A0A0R2A5W6	A0A0R2A5W6_9LACO	Aldehyde-alcohol dehydrogenase	FC26_GL001001	Lactobacillus vaccinostercus DSM 20634	869	94,597	
A0A0R2CQL4	A0A0R2CQL4_9LACO	Aldehyde-alcohol dehydrogenase	FC56_GL001011	Lactobacillus senioris DSM 24302 = JCM 17472	876	95,024	
A0A0R1YPQ8	A0A0R1YPQ8_9LACO	Aldehyde-alcohol dehydrogenase	FD47_GL002041	Lactobacillus parafarraginis DSM 18390 = JCM 14109	872	94,769	
A0A0R2AVS5	A0A0R2AVS5_9LACO	Aldehyde-alcohol dehydrogenase	FC34_GL001652	Lactobacillus brantae DSM 23927	870	94,645	
A0A0R1W804	A0A0R1W804_9LACO	Aldehyde-alcohol dehydrogenase	FC15_GL001103	Lactobacillus concavus DSM 17758	868	94,148	
A0A0R1NJW3	A0A0R1NJW3_9LACO	Aldehyde-alcohol dehydrogenase	FC98_GL001326	Lactobacillus kisonensis DSM 19906 = JCM 15041	873	95,354	
A0A0R2BF57	A0A0R2BF57_9LACO	Aldehyde-alcohol dehydrogenase	FC84_GL001259	Lactobacillus dextrinicus DSM 20335	868	94,275	
A0A0R1LQA6	A0A0R1LQA6_9LACO	Aldehyde-alcohol dehydrogenase	FC88_GL000046	Lactobacillus futsaii JCM 17355	872	95,111	
A0A0R2F445	A0A0R2F445_9LACO	Aldehyde-alcohol dehydrogenase	FC75_GL001678	Lactobacillus camelliae DSM 22697 = JCM 13995	868	94,699	
A0A0R1HKM7	A0A0R1HKM7_9LACO	Aldehyde-alcohol dehydrogenase	FC96_GL000817	Lactobacillus kimchicus JCM 15530	873	95,457	
A0A0R1Z182	A0A0R1Z182_9LACO	Aldehyde-alcohol dehydrogenase	FC51_GL000787	Lactobacillus parabuchneri DSM 5707 = NBRC 107865	872	95,077	
A0A0R2CW03	A0A0R2CW03_9LACO	Aldehyde-alcohol dehydrogenase	FC24_GL001956	Lactobacillus rennini DSM 20253	872	94,849	
A0A0R2BUU3	A0A0R2BUU3_9LACO	Aldehyde-alcohol dehydrogenase	FC25_GL002027	Lactobacillus ruminis DSM 20403 = NBRC 102161	898	98,676	
A0A0R1X1K2	A0A0R1X1K2_9LACO	Aldehyde-alcohol dehydrogenase	FC91_GL001508	Lactobacillus harbinensis DSM 16991	872	95,124	
A0A0R1VGE9	A0A0R1VGE9_9LACO	Aldehyde-alcohol dehydrogenase	FC60_GL001295	Lactobacillus gastricus DSM 16045	869	94,965	
A0A0R1IRF7	A0A0R1IRF7_9LACO	Aldehyde-alcohol dehydrogenase	FC68_GL000861	Lactobacillus farciminis KCTC 3681 = DSM 20184	872	95,066	
A0A0R1FP75	A0A0R1FP75_LACPE	Aldehyde-alcohol dehydrogenase	FD24_GL000910	Lactobacillus pentosus DSM 20314	867	94,716	
A0A0R1GQW0	A0A0R1GQW0_9LACO	Aldehyde-alcohol dehydrogenase	FD07_GL000842	Lactobacillus parabrevis ATCC 53295	872	95,32	
A0A0R1M5V8	A0A0R1M5V8_9LACO	Aldehyde-alcohol dehydrogenase	FC81_GL001803	Lactobacillus capillatus DSM 19910	897	98,274	
A0A0R2D4M0	A0A0R2D4M0_9LACO	Aldehyde-alcohol dehydrogenase	FC19_GL001981	Lactobacillus aquaticus DSM 21051	897	98,28	
A0A0R2CVY5	A0A0R2CVY5_9LACO	Aldehyde-alcohol dehydrogenase	FC80_GL000218	Lactobacillus cacaonum DSM 21116	896	98,721	
A0A0B2XK91	A0A0B2XK91_LACCU	Aldehyde-alcohol dehydrogenase	OA78_1707	Lactobacillus curvatus	866	93,737	
A0A0K1MRS5	A0A0K1MRS5_LACPA	Aldehyde-alcohol dehydrogenase	AWC33_08035 LPL9_0831	Lactobacillus paracasei	868	94,545	
A0A0R1UWU4	A0A0R1UWU4_9LACO	Aldehyde-alcohol dehydrogenase	FD50_GL001693	Lactobacillus satsumensis DSM 16230 = JCM 12392	897	98,128	
A0A0R1H9R9	A0A0R1H9R9_LACAM	Aldehyde-alcohol dehydrogenase	FC63_GL001423	Lactobacillus amylovorus DSM 20531	875	96,041	
A0A0R1VI40	A0A0R1VI40_9LACO	Aldehyde-alcohol dehydrogenase	FC59_GL000204	Lactobacillus kitasatonis DSM 16761 = JCM 1039	875	96,043	
A0A0R2CMT7	A0A0R2CMT7_9LACO	Aldehyde-alcohol dehydrogenase	FD21_GL000204	Lactobacillus vini DSM 20605	841	91,472	
A0A0R1TEH0	A0A0R1TEH0_9LACO	Aldehyde-alcohol dehydrogenase	FC17_GL000294	Lactobacillus paracollinoides DSM 15502 = JCM 11969	876	95,896	
A0A0R2DH92	A0A0R2DH92_9LACO	Aldehyde-alcohol dehydrogenase	FD18_GL001569	Lactobacillus taiwanensis DSM 21401	869	95,605	
A0A0R1UDL5	A0A0R1UDL5_9LACO	Aldehyde-alcohol dehydrogenase	FC46_GL001124	Lactobacillus kalixensis DSM 16043	872	96,217	
A0A0R1K2I2	A0A0R1K2I2_9LACO	Aldehyde-alcohol dehydrogenase	FC67_GL000228	Lactobacillus alimentarius DSM 20249	872	95,268	
A0A0R1MKY9	A0A0R1MKY9_9LACO	Aldehyde-alcohol dehydrogenase	FD46_GL001146	Lactobacillus oeni DSM 19972	896	98,635	
A0A0R2ESE5	A0A0R2ESE5_9LACO	Aldehyde-alcohol dehydrogenase	FD14_GL001742	Lactobacillus similis DSM 23365 = JCM 2765	873	95,359	
A0A0R1PX90	A0A0R1PX90_9LACO	Aldehyde-alcohol dehydrogenase	FD20_GL000673	Lactobacillus uvarum DSM 19971	897	98,302	
A0A0R1LAF0	A0A0R1LAF0_LACCU	Aldehyde-alcohol dehydrogenase	FC08_GL000671	Lactobacillus curvatus JCM 1096 = DSM 20019	866	93,712	
A0A0R2GB10	A0A0R2GB10_9LACO	Aldehyde-alcohol dehydrogenase	FC77_GL001224	Lactobacillus acetotolerans DSM 20749 = JCM 3825	874	95,975	
A0A0R1QDZ6	A0A0R1QDZ6_9LACO	Aldehyde-alcohol dehydrogenase	FD29_GL001607	Lactobacillus mindensis DSM 14500	868	94,529	
A0A0R1M354	A0A0R1M354_9LACO	Aldehyde-alcohol dehydrogenase	FD04_GL000627	Lactobacillus odoratitofui DSM 19909 = JCM 15043	873	95,524	
A0A0R2BGJ8	A0A0R2BGJ8_LACCL	Aldehyde-alcohol dehydrogenase	FC82_GL002893	Lactobacillus collinoides DSM 20515 = JCM 1123	876	95,834	
A0A0R1FLJ0	A0A0R1FLJ0_LACBR	Aldehyde-alcohol dehydrogenase	FC61_GL001630	Lactobacillus brevis ATCC 14869 = DSM 20054	872	95,227	
A0A0R1WYY7	A0A0R1WYY7_9LACO	Aldehyde-alcohol dehydrogenase	FC40_GL001221	Lactobacillus hayakitensis DSM 18933 = JCM 14209	888	97,737	
A0A0R1MA87	A0A0R1MA87_9LACO	Aldehyde-alcohol dehydrogenase	FC20_GL000525	Lactobacillus equicursoris DSM 19284 = JCM 14600 = CIP 110162	901	99,096	
A0A0R1VQ72	A0A0R1VQ72_9LACO	Aldehyde-alcohol dehydrogenase	FC89_GL002085	Lactobacillus ghanensis DSM 18630	896	97,916	
A0A0R1QAP7	A0A0R1QAP7_9LACO	Aldehyde-alcohol dehydrogenase	FD45_GL001024	Lactobacillus nagelii DSM 13675	896	97,841	
A0A0R1NLM4	A0A0R1NLM4_9LACO	Aldehyde-alcohol dehydrogenase	FC37_GL001706	Lactobacillus gallinarum DSM 10532 = JCM 2011	874	96,311	
A0A0R2ASQ9	A0A0R2ASQ9_9LACO	Aldehyde-alcohol dehydrogenase	FC14_GL001971	Lactobacillus agilis DSM 20509	894	97,762	
A0A0R1T0F3	A0A0R1T0F3_9LACO	Aldehyde-alcohol dehydrogenase	FC54_GL000666	Lactobacillus saerimneri DSM 16049	859	93,22	
A0A0R2KUZ9	A0A0R2KUZ9_LACAM	Aldehyde-alcohol dehydrogenase	IV44_GL000705	Lactobacillus amylovorus DSM 16698	875	96,053	
A0A0R1IMW6	A0A0R1IMW6_9LACO	Aldehyde-alcohol dehydrogenase	FC73_GL001035	Lactobacillus fructivorans KCTC 3543 = DSM 20203	878	95,988	
A0A0R1YD31	A0A0R1YD31_9LACO	Aldehyde-alcohol dehydrogenase	FC39_GL000705	Lactobacillus hamsteri DSM 5661 = JCM 6256	872	95,971	
A0A0R2DE68	A0A0R2DE68_9LACO	Aldehyde-alcohol dehydrogenase	FD13_GL000537	Lactobacillus senmaizukei DSM 21775 = NBRC 103853	872	95,069	
A0A0R1WFH8	A0A0R1WFH8_9LACO	Aldehyde-alcohol dehydrogenase	FC49_GL000789	Lactobacillus oris DSM 4864	880	97,057	
A0A0R1Y2I5	A0A0R1Y2I5_9LACO	Aldehyde-alcohol dehydrogenase	FC44_GL001023	Lactobacillus intestinalis DSM 6629	874	96,437	
A0A0R1UQ25	A0A0R1UQ25_9LACO	Aldehyde-alcohol dehydrogenase	FC21_GL000859	Lactobacillus equigenerosi DSM 18793 = JCM 14505	879	96,13	
A0A0R1S6Q5	A0A0R1S6Q5_9LACO	Aldehyde-alcohol dehydrogenase	FC23_GL000314	Lactobacillus psittaci DSM 15354	862	94,031	
A0A0R1Q5E8	A0A0R1Q5E8_9LACO	Aldehyde-alcohol dehydrogenase	FD01_GL002514	Lactobacillus manihotivorans DSM 13343 = JCM 12514	885	96,597	
A0A062WZ36	A0A062WZ36_9LACO	Aldehyde-alcohol dehydrogenase	Lani381_1385	Lactobacillus animalis	896	97,882	
A0A081NRS8	A0A081NRS8_LACRE	Aldehyde-alcohol dehydrogenase	HF82_05280	Lactobacillus reuteri	878	97,198	
A0A073JNB1	A0A073JNB1_LACRE	Aldehyde-alcohol dehydrogenase	LR3_02355	Lactobacillus reuteri	878	97,199	
A0A0P0CCL0	A0A0P0CCL0_LACDE	Alcohol-acetaldehyde dehydrogenase (Fragment)	ald	Lactobacillus delbrueckii subsp. bulgaricus	121	13,322	
A0A0P0BQM1	A0A0P0BQM1_LACDE	Alcohol-acetaldehyde dehydrogenase (Fragment)	ald	Lactobacillus delbrueckii subsp. bulgaricus	121	13,26	
A0A0P0CJD5	A0A0P0CJD5_LACDE	Alcohol-acetaldehyde dehydrogenase (Fragment)	ald	Lactobacillus delbrueckii subsp. bulgaricus	121	13,338	
A0A0K1MQY1	A0A0K1MQY1_LACPA	2-deoxy-D-gluconate 3-dehydrogenase (Short-chain alcohol dehydrogenase)	AWC33_09240 LPL9_0519	Lactobacillus paracasei	277	30,196	
A0A125PHB6	A0A125PHB6_LACBR	Aryl-alcohol dehydrogenase	ABB39_04245 AV935_00085	Lactobacillus brevis	362	38,567	
A0A109F8Q8	A0A109F8Q8_LACBR	Molecular chaperone GroES (Zn-dependent alcohol dehydrogenase)	ABB39_02690 AV935_01090	Lactobacillus brevis	346	36,792	
A0A120E4Y9	A0A120E4Y9_LACBR	Alcohol dehydrogenase	ABB39_03295 AV935_01700	Lactobacillus brevis	339	37,119	
A0A109AW69	A0A109AW69_LACBR	Alcohol dehydrogenase (Uncharacterized protein)	ABB39_01710 AV935_11455	Lactobacillus brevis	336	35,528	
A0A120CM33	A0A120CM33_LACBR	Alcohol dehydrogenase	ABB39_06755 AV935_06350	Lactobacillus brevis	373	40,305	
A0A120E4K3	A0A120E4K3_LACBR	Alcohol dehydrogenase	ABB39_03435 AV935_01780	Lactobacillus brevis	164	18,429	
A0A109F8R0	A0A109F8R0_LACBR	Acetaldehyde dehydrogenase (Bifunctional acetaldehyde-CoA/alcohol dehydrogenase)	ABB39_10660 AV935_09595	Lactobacillus brevis	873	95,396	
A0A0G9FDQ6	A0A0G9FDQ6_LACPN	Aldehyde-alcohol dehydrogenase	AKJ11_11270 JM48_3101	Lactobacillus plantarum	867	94,554	
A0A0M6W8B7	A0A0M6W8B7_LACPA	Short-chain alcohol dehydrogenase		Lactobacillus paracasei	237	24,307	
A0A0U4GTY3	A0A0U4GTY3_LACPA	Alcohol dehydrogenase	AWC33_11735	Lactobacillus paracasei	361	38,619	
A0A0U4HVH1	A0A0U4HVH1_LACPA	Zn-dependent alcohol dehydrogenase	AWC33_00880	Lactobacillus paracasei	346	36,923	
A0A0K1MWY5	A0A0K1MWY5_LACPA	Alcohol dehydrogenase	LPL9_2312	Lactobacillus paracasei	346	36,893	
A0A0K1MU47	A0A0K1MU47_LACPA	Zinc-containing alcohol dehydrogenase	LPL9_1666	Lactobacillus paracasei	165	18,196	
A0A0K1MYG0	A0A0K1MYG0_LACPA	Alcohol dehydrogenase	LPL9_2862	Lactobacillus paracasei	362	40,039	
A0A0K1MRN2	A0A0K1MRN2_LACPA	Alcohol dehydrogenase	LPL9_0781	Lactobacillus paracasei	340	36,17	
A0A0K1MYE5	A0A0K1MYE5_LACPA	Alcohol dehydrogenase	LPL9_2842	Lactobacillus paracasei	350	38,227	
A0A0U3ZH97	A0A0U3ZH97_LACPA	Alcohol dehydrogenase	AWC33_09400	Lactobacillus paracasei	340	37,249	
A0A0K1MR61	A0A0K1MR61_LACPA	Zinc-containing alcohol dehydrogenase	LPL9_0621	Lactobacillus paracasei	58	6,311	
A0A0K1MRE3	A0A0K1MRE3_LACPA	Zinc-containing alcohol dehydrogenase	LPL9_0698	Lactobacillus paracasei	302	31,42	
A0A0K1MRK0	A0A0K1MRK0_LACPA	Alcohol dehydrogenase	LPL9_0761	Lactobacillus paracasei	319	33,381	
A0A0K1L414	A0A0K1L414_LACPA	Alcohol dehydrogenase	AKG30_14770	Lactobacillus paracasei	169	19,285	
A0A0K1L0X8	A0A0K1L0X8_LACPA	Molecular chaperone GroES	AKG30_10455	Lactobacillus paracasei	346	36,791	
A0A0K1L2S5	A0A0K1L2S5_LACPA	Alcohol dehydrogenase	AKG30_13490	Lactobacillus paracasei	361	38,608	
F6ISY5	F6ISY5_LACPE	Aryl-alcohol dehydrogenase (EC 1.1.1.90)	LPE_00665	Lactobacillus pentosus MP-10	373	39,995	
F6IUK8	F6IUK8_LACPE	Iron-containing alcohol dehydrogenase	LPE_01279	Lactobacillus pentosus MP-10	373	40,112	
F6IXP5	F6IXP5_LACPE	L-iditol 2-dehydrogenase (EC 1.1.1.14)	LPE_02478	Lactobacillus pentosus MP-10	352	38,233	
F6IS69	F6IS69_LACPE	Alcohol dehydrogenase (EC 1.1.1.1)	LPE_00383	Lactobacillus pentosus MP-10	347	36,792	
F6IRU4	F6IRU4_LACPE	Alcohol dehydrogenase	LPE_00252	Lactobacillus pentosus MP-10	346	37,056	
F6IZC6	F6IZC6_LACPE	Alcohol dehydrogenase (EC 1.1.1.1)	LPE_03121	Lactobacillus pentosus MP-10	348	37,68	
V5T8Y8	V5T8Y8_9LACO	Benzyl alcohol dehydrogenase		Lactobacillus mellis	380	40,679	
Q6WVP7	Q6WVP7_9LACO	NADPH dependent R-specific alcohol dehydrogenase	adhR	Lactobacillus kefiri	252	26,781	
A0A0P0BRA7	A0A0P0BRA7_LACDE	Alcohol-acetaldehyde dehydrogenase (Fragment)	ald	Lactobacillus delbrueckii subsp. bulgaricus	121	13,233	
A0A0P0BV08	A0A0P0BV08_LACDE	Alcohol-acetaldehyde dehydrogenase (Fragment)	ald	Lactobacillus delbrueckii subsp. bulgaricus	121	13,261	
A0A0U3D522	A0A0U3D522_LACDE	Alcohol dehydrogenase	AT236_00893	Lactobacillus delbrueckii subsp. bulgaricus	270	29,786	
B5AXN9	B5AXN9_9LACO	NADH-dependent (S)-specific alcohol dehydrogenase (EC 1.1.1.1)	adhS	Lactobacillus kefiri	347	36,957	
A0A0A7RGH5	A0A0A7RGH5_9LACO	Aryl-alcohol dehydrogenase		Lactobacillus sucicola	372	39,971	
A0A023MG68	A0A023MG68_LACPN	L-iditol 2-dehydrogenase	I526_2869	Lactobacillus plantarum DOMLa	369	40,055	
A0A023MFS3	A0A023MFS3_LACPN	Putative aryl-alcohol dehydrogenase (NADP(+))	I526_2340	Lactobacillus plantarum DOMLa	342	38,35	
A0A023M811	A0A023M811_LACPN	Aryl-alcohol dehydrogenase family enzyme	I526_0188	Lactobacillus plantarum DOMLa	330	36,911	
A0A023MDQ8	A0A023MDQ8_LACPN	Alcohol dehydrogenase, zinc-containing	I526_1404	Lactobacillus plantarum DOMLa	347	36,694	
A0A023MAX6	A0A023MAX6_LACPN	Aryl-alcohol dehydrogenase related enzyme	I526_0131	Lactobacillus plantarum DOMLa	290	31,891	
A0A023MGE3	A0A023MGE3_LACPN	Aryl-alcohol dehydrogenase	I526_2461	Lactobacillus plantarum DOMLa	373	40,018	
A0A023MFR5	A0A023MFR5_LACPN	Alcohol dehydrogenase, zinc-containing	I526_2330	Lactobacillus plantarum DOMLa	346	36,679	
A0A109AJJ9	A0A109AJJ9_LACPN	Alcohol dehydrogenase	ABB43_04950	Lactobacillus plantarum	316	34,317	
A0A0M3QB49	A0A0M3QB49_LACPN	Alcohol dehydrogenase	JM48_1411	Lactobacillus plantarum	347	36,71	
A0A120CIS6	A0A120CIS6_LACPN	Alcohol dehydrogenase	ABB43_14700	Lactobacillus plantarum	157	17,614	
A0A0M3URB1	A0A0M3URB1_LACPN	Alcohol dehydrogenase	AKJ11_11825	Lactobacillus plantarum	325	34,141	
A0A0M3QBU7	A0A0M3QBU7_LACPN	Aryl-alcohol dehydrogenase	JM48_2624	Lactobacillus plantarum	373	39,95	
A0A0M3UR60	A0A0M3UR60_LACPN	Alcohol dehydrogenase	AKJ11_12180	Lactobacillus plantarum	304	32,885	
A0A0N9J216	A0A0N9J216_LACPN	Aldehyde-alcohol dehydrogenase	AN634_08580	Lactobacillus plantarum	867	94,582	
A0A0U3MB24	A0A0U3MB24_LACPN	Aldehyde-alcohol dehydrogenase	AD081_15155	Lactobacillus plantarum	867	94,554	
A0A0M4R9B3	A0A0M4R9B3_LACPN	Alcohol dehydrogenase	AKJ11_02650	Lactobacillus plantarum	343	37,808	
A0A0N9J7E6	A0A0N9J7E6_LACPN	Alcohol dehydrogenase	AN634_00320	Lactobacillus plantarum	343	37,573	
A0A0N9JBM1	A0A0N9JBM1_LACPN	Molecular chaperone GroES	AN634_06060	Lactobacillus plantarum	346	36,682	
A0A0M4RQM8	A0A0M4RQM8_LACPN	Alcohol dehydrogenase	AKJ11_03225	Lactobacillus plantarum	316	34,359	
A0A0M4D367	A0A0M4D367_LACPN	Oxidoreductase, medium chain dehydrogenases/reductase (MDR)/zinc-dependent alcohol dehydrogenase-like family	JM48_1705	Lactobacillus plantarum	314	33,587	
A0A109AGQ1	A0A109AGQ1_LACPN	Aryl-alcohol dehydrogenase	ABB43_11420	Lactobacillus plantarum	373	40,02	
A0A0M3QAG9	A0A0M3QAG9_LACPN	Zinc-containing alcohol dehydrogenase	JM48_0067	Lactobacillus plantarum	334	36,244	
A0A0M4RSC9	A0A0M4RSC9_LACPN	Molecular chaperone GroES	AKJ11_08195	Lactobacillus plantarum	346	36,679	
A0A0M3UQ74	A0A0M3UQ74_LACPN	Molecular chaperone GroES	AKJ11_03245	Lactobacillus plantarum	347	36,694	
A0A0N9J857	A0A0N9J857_LACPN	Alcohol dehydrogenase	AN634_09130	Lactobacillus plantarum	325	34,142	
A0A0N9JAT5	A0A0N9JAT5_LACPN	Alcohol dehydrogenase	AN634_09315	Lactobacillus plantarum	164	18,681	
A0A0N9JBX9	A0A0N9JBX9_LACPN	Aryl-alcohol dehydrogenase	AN634_06750	Lactobacillus plantarum	373	39,995	
A0A0M4D2E5	A0A0M4D2E5_LACPN	Alcohol dehydrogenase	JM48_1279	Lactobacillus plantarum	343	37,551	
A0A0N7F9S3	A0A0N7F9S3_LACPN	Alcohol dehydrogenase	AN634_09465	Lactobacillus plantarum	304	32,684	
A0A0M4CIX5	A0A0M4CIX5_LACPN	Aryl-alcohol dehydrogenase family enzyme	JM48_0175	Lactobacillus plantarum	330	36,925	
A0A0N9J4P7	A0A0N9J4P7_LACPN	Molecular chaperone GroES	AN634_00915	Lactobacillus plantarum	347	36,751	
A0A0N9IYR6	A0A0N9IYR6_LACPN	Alcohol dehydrogenase	AN634_00910	Lactobacillus plantarum	316	34,301	
A0A0N7F9E9	A0A0N7F9E9_LACPN	Alcohol dehydrogenase	AN634_03915	Lactobacillus plantarum	342	36,042	
A0A0S2H5R5	A0A0S2H5R5_9LACO	Sorbitol dehydrogenase	ASU28_14215	Lactobacillus paraplantarum	369	40,019	
A0A0S2H5Z2	A0A0S2H5Z2_9LACO	Alcohol dehydrogenase	ASU28_03455	Lactobacillus paraplantarum	164	18,676	
A0A0A7RKQ3	A0A0A7RKQ3_9LACO	Aryl-alcohol dehydrogenase		Lactobacillus cacaonum	372	39,776	
Q5GHF0	Q5GHF0_LACRH	Xylitol-phosphate dehydrogenase		Lactobacillus rhamnosus	349	38,485	
G0M5I9	G0M5I9_LACPE	Alcohol dehydrogenase	LPENT_02217	Lactobacillus pentosus IG1	348	37,68	
G0M4R1	G0M4R1_LACPE	L-iditol 2-dehydrogenase (EC 1.1.1.14)	LPENT_01892	Lactobacillus pentosus IG1	352	38,233	
G0LZI6	G0LZI6_LACPE	Alcohol dehydrogenase	LPENT_02782	Lactobacillus pentosus IG1	346	37,055	
G0LYK9	G0LYK9_LACPE	Dehydrogenase	LPENT_00123	Lactobacillus pentosus IG1	357	38,338	
G0LZB5	G0LZB5_LACPE	Putative ferric reductase (EC 1.1.1.1)	LPENT_02697	Lactobacillus pentosus IG1	320	36,228	
G0M5R6	G0M5R6_LACPE	Aryl-alcohol dehydrogenase (EC 1.1.1.90)	LPENT_02307	Lactobacillus pentosus IG1	373	39,965	
G0LYG4	G0LYG4_LACPE	Alcohol dehydrogenase zinc-binding domain protein (EC 1.1.1.2)	LPENT_00064	Lactobacillus pentosus IG1	352	38,356	
A0A109B354	A0A109B354_LACCA	Alcohol dehydrogenase	ABB40_05680	Lactobacillus casei	361	38,604	
A0A120CRI0	A0A120CRI0_LACCA	Alcohol dehydrogenase	ABB40_04245	Lactobacillus casei	340	37,278	
G0LZU6	G0LZU6_LACPE	Alcohol dehydrogenase (EC 1.1.1.1)	LPENT_00325	Lactobacillus pentosus IG1	347	36,772	
A0A109B0H3	A0A109B0H3_LACCA	Alcohol dehydrogenase	ABB40_13255	Lactobacillus casei	169	19,287	
A0A0K2L9T1	A0A0K2L9T1_9LACO	Alcohol dehydrogenase	JP39_00430	Lactobacillus heilongjiangensis	317	33,47	
Q3MN68	Q3MN68_LACPA	Alcohol dehydrogenase-like		Lactobacillus paracasei subsp. paracasei	334	36,122	
A0A0K2LET7	A0A0K2LET7_9LACO	Molecular chaperone GroES	JP39_10720	Lactobacillus heilongjiangensis	345	37,025	
A0A0K2LAW8	A0A0K2LAW8_9LACO	Aldehyde-alcohol dehydrogenase	JP39_03220	Lactobacillus heilongjiangensis	869	94,543	
A0A0K2LBB5	A0A0K2LBB5_9LACO	Molecular chaperone GroES	JP39_04030	Lactobacillus heilongjiangensis	347	36,973	
A0A0K2LB35	A0A0K2LB35_9LACO	Alcohol dehydrogenase	JP39_03540	Lactobacillus heilongjiangensis	331	36,222	
A0A0U5EXS0	A0A0U5EXS0_LACRE	Alcohol dehydrogenase (EC 1.1.1.1)	LRLP16767_LRPG3B_00746	Lactobacillus reuteri	348	37,9	
A0A0U5JPF9	A0A0U5JPF9_LACRE	Alcohol dehydrogenase (EC 1.1.1.1)	LRLP16767_LR3C6_00349	Lactobacillus reuteri	348	37,865	
A0A0U5K1M8	A0A0U5K1M8_LACRE	Benzyl alcohol dehydrogenase	LRLP16767_LRLP167_00800	Lactobacillus reuteri	368	39,263	
A0A0U5EWW9	A0A0U5EWW9_LACRE	Alcohol dehydrogenase (EC 1.1.1.1)	LRLP16767_LRPG3B_00474	Lactobacillus reuteri	351	37,707	
A0A0S4NLX2	A0A0S4NLX2_LACRE	Alcohol dehydrogenase (EC 1.1.1.1)	adhA2 LRATCC53608_0530	Lactobacillus reuteri	342	36,158	
A4L2V0	A4L2V0_LACRE	1,3-propanediol dehydrogenase	lr1793	Lactobacillus reuteri	390	42,181	
A0A0U5F677	A0A0U5F677_LACRE	2,3-butanediol dehydrogenase, S-alcohol forming, (S)-acetoin-specific (EC 1.1.1.76)	LRLP16767_LR3C6_01900	Lactobacillus reuteri	153	16,544	
A0A0U5JSN9	A0A0U5JSN9_LACRE	Alcohol dehydrogenase (EC 1.1.1.1)	LRLP16767_LR3C6_01810	Lactobacillus reuteri	390	42,194	
A0A0S4NRX2	A0A0S4NRX2_LACRE	Aldehyde-alcohol dehydrogenase 2 (EC 1.1.1.1)	adh2 LRATCC53608_1675	Lactobacillus reuteri	878	97,183	
A0A0U5JSU1	A0A0U5JSU1_LACRE	Aldehyde-alcohol dehydrogenase	LRLP16767_LR3C6_00902	Lactobacillus reuteri	878	97,198	
A0A0U5JS53	A0A0U5JS53_LACRE	Bifunctional protein: zinc-containing alcohol dehydrogenase quinone oxidoreductase ( NADPH:quinone reductase) Similar to arginate lyase	LRLP16767_LR202_00796	Lactobacillus reuteri	338	37,236	
A0A0U5D037	A0A0U5D037_LACRE	Alcohol dehydrogenase (EC 1.1.1.1)	LRLP16767_LR3C6_00973	Lactobacillus reuteri	374	40,359	
A0A0U5D7V6	A0A0U5D7V6_LACRE	Short-chain alcohol dehydrogenase	LRLP16767_LRLP167_00284	Lactobacillus reuteri	44	4,659	
Q6ECH5	Q6ECH5_LACRE	Mannitol dehydrogenase (EC 1.1.1.67)		Lactobacillus reuteri	336	35,964	
A0A0U5JQ01	A0A0U5JQ01_LACRE	Alcohol dehydrogenase (EC 1.1.1.1)	LRLP16767_LR202_00004	Lactobacillus reuteri	348	37,879	
A0A0U5JV37	A0A0U5JV37_LACRE	Alcohol dehydrogenase (EC 1.1.1.1)	LRLP16767_LR202_00824	Lactobacillus reuteri	351	37,598	
A0A0U5JTM8	A0A0U5JTM8_LACRE	Bifunctional protein: zinc-containing alcohol dehydrogenase quinone oxidoreductase ( NADPH:quinone reductase) Similar to arginate lyase	LRLP16767_LR3C6_01469	Lactobacillus reuteri	152	16,631	
A0A0U5JWH0	A0A0U5JWH0_LACRE	Aldehyde-alcohol dehydrogenase	LRLP16767_LR202_01714	Lactobacillus reuteri	878	97,199	
A0A0U5JTB6	A0A0U5JTB6_LACRE	2,3-butanediol dehydrogenase, S-alcohol forming, (R)-acetoin-specific / Acetoin (Diacetyl) reductase (EC 1.1.1.-) (EC 1.1.1.4)	LRLP16767_LR3C6_01722	Lactobacillus reuteri	257	27,04	
A0A0U5JTT5	A0A0U5JTT5_LACRE	2,3-butanediol dehydrogenase, S-alcohol forming, (S)-acetoin-specific (EC 1.1.1.76)	LRLP16767_LR3C6_01899	Lactobacillus reuteri	68	7,456	
A0A0U5F112	A0A0U5F112_LACRE	Benzyl alcohol dehydrogenase	LRLP16767_LR3C6_00256	Lactobacillus reuteri	141	15,143	
A0A0U5F6E0	A0A0U5F6E0_LACRE	Alcohol dehydrogenase (EC 1.1.1.1)	LRLP16767_LR202_00060	Lactobacillus reuteri	342	36,172	
A0A0U5JWX5	A0A0U5JWX5_LACRE	Bifunctional protein: zinc-containing alcohol dehydrogenase quinone oxidoreductase ( NADPH:quinone reductase) Similar to arginate lyase	LRLP16767_LR202_00441	Lactobacillus reuteri	152	16,601	
A0A0U5K361	A0A0U5K361_LACRE	Alcohol dehydrogenase (EC 1.1.1.1)	LRLP16767_LRLP167_01065	Lactobacillus reuteri	340	35,976	
A5HNZ8	A5HNZ8_LACRE	Zn-dependent alcohol dehydrogenase	lr1480	Lactobacillus reuteri	348	37,938	
A0A0U5JGA5	A0A0U5JGA5_LACRE	2,3-butanediol dehydrogenase, S-alcohol forming, (S)-acetoin-specific (EC 1.1.1.76)	LRLP16767_LRPG3B_00770	Lactobacillus reuteri	261	28,288	
A0A0S4NL54	A0A0S4NL54_LACRE	Zinc-binding alcohol dehydrogenase family protein (EC 1.1.1.1)	adhA LRATCC53608_0484	Lactobacillus reuteri	348	37,868	
A0A0U5F315	A0A0U5F315_LACRE	Alcohol dehydrogenase (EC 1.1.1.1)	LRLP16767_LR3C6_00932	Lactobacillus reuteri	351	37,494	
A0A0U5JZA9	A0A0U5JZA9_LACRE	Alcohol dehydrogenase (EC 1.1.1.1)	LRLP16767_LRLP167_00323	Lactobacillus reuteri	341	35,985	
A0A0U5JRK8	A0A0U5JRK8_LACRE	Bifunctional protein: zinc-containing alcohol dehydrogenase quinone oxidoreductase ( NADPH:quinone reductase) Similar to arginate lyase	LRLP16767_LR3C6_01468	Lactobacillus reuteri	160	17,375	
Q2F7L2	Q2F7L2_LACRE	Alcohol dehydrogenase class IV	lr1867	Lactobacillus reuteri	375	40,557	
A4L2Z1	A4L2Z1_LACRE	AdhP (Fragment)	lr0781	Lactobacillus reuteri	300	31,625	
Q93MP4	Q93MP4_LACSK	Alcohol dehydrogenase AdhA (Fragment)	adhA	Lactobacillus sakei	39	4,22	
Q1KMS7	Q1KMS7_LACRE	Mannitol dehydrogenase (Fragment)	lr0267	Lactobacillus reuteri	315	33,851	
Q71HT4	Q71HT4_LACDL	Alcohol-acetaldehyde dehydrogenase (Fragment)		Lactobacillus delbrueckii subsp. lactis	132	14,275	
Q71IA2	Q71IA2_LACDL	Alcohol-acetaldehyde dehydrogenase (Fragment)		Lactobacillus delbrueckii subsp. lactis	48	5,294	
Q71HT5	Q71HT5_LACDL	Alcohol-acetaldehyde dehydrogenase (Fragment)		Lactobacillus delbrueckii subsp. lactis	88	9,876	
U5NH13	U5NH13_9LACO	Sorbitol dehydrogenase (EC 1.1.1.14)		Lactobacillus panis	339	36,929	
A0A0P0E7S6	A0A0P0E7S6_9LACO	Aldehyde-alcohol dehydrogenase	AO203_05030	Lactobacillus gallinarum	874	96,367	
Q84EX5	Q84EX5_LACBR	R-specific alcohol dehydrogenase	radh	Lactobacillus brevis	252	26,758	
A0A109F7F3	A0A109F7F3_LACBR	Alcohol dehydrogenase	AV935_11590	Lactobacillus brevis	325	34,255	
F0HT64	F0HT64_LACDL	Alcohol dehydrogenase (EC 1.1.1.1)	adh FC10_GL001195 HMPREF5505_0110	Lactobacillus delbrueckii subsp. lactis DSM 20072	344	36,723	
J0L1T2	J0L1T2_9LACO	L-iditol 2-dehydrogenase	FD00_GL000346 LMA_00297	Lactobacillus mali KCTC 3596 = DSM 20444	355	38,432	
J1F0N1	J1F0N1_9LACO	Aryl-alcohol dehydrogenase related enzyme	FD00_GL001229 LMA_09665	Lactobacillus mali KCTC 3596 = DSM 20444	279	31,078	
J1F3A3	J1F3A3_9LACO	Alcohol dehydrogenase	FD00_GL000262 LMA_04851	Lactobacillus mali KCTC 3596 = DSM 20444	339	37,814	
J0L220	J0L220_9LACO	Arayl-alcohol dehydrogenase (Aryl-alcohol dehydrogenase)	adhC FD00_GL001590 LMA_00044	Lactobacillus mali KCTC 3596 = DSM 20444	372	39,884	
A0A0R2G6K2	A0A0R2G6K2_9LACO	Alcohol dehydrogenase	IV38_GL000951 IV40_GL000902	Lactobacillus selangorensis	346	36,833	
A0A0R2FY88	A0A0R2FY88_9LACO	Alcohol dehydrogenase	IV38_GL001234 IV40_GL000619	Lactobacillus selangorensis	352	38,388	
A0A0R2FI67	A0A0R2FI67_9LACO	Aldehyde-alcohol dehydrogenase	IV38_GL002098 IV40_GL001352	Lactobacillus selangorensis	460	49,173	
A0A0R2FHV7	A0A0R2FHV7_9LACO	Threonine dehydrogenase related Zn-dependent dehydrogenase	IV38_GL001579 IV40_GL001636	Lactobacillus selangorensis	347	37,019	
A0A098R750	A0A098R750_9LACO	Aryl-alcohol dehydrogenase	ASU28_12385 HR47_04280	Lactobacillus paraplantarum	373	40,018	
A0A0H4LHK3	A0A0H4LHK3_9LACO	Aryl-alcohol dehydrogenase	ABB44_10440 ABB45_10420	Lactobacillus farciminis	373	39,812	
A0A098RB66	A0A098RB66_9LACO	Alcohol dehydrogenase	ASU28_06250 HR47_04775	Lactobacillus paraplantarum	343	37,833	
A0A0H4L8V4	A0A0H4L8V4_9LACO	Molecular chaperone GroES	ABB44_00120 ABB45_00120	Lactobacillus farciminis	347	36,819	
A0A098R2Z1	A0A098R2Z1_9LACO	Alcohol dehydrogenase	ASU28_06815 HR47_11980	Lactobacillus paraplantarum	157	17,903	
A0A0H4L750	A0A0H4L750_9LACO	Alcohol dehydrogenase (NADPH:quinone reductase)	ABB44_00400 ABB45_00400 NBRC111452_2327	Lactobacillus farciminis	331	36,561	
A0A0H4LGM5	A0A0H4LGM5_9LACO	Alcohol dehydrogenase	ABB44_08430 ABB45_08410 NBRC111452_277	Lactobacillus farciminis	328	35,189	
A0A098RA58	A0A098RA58_9LACO	Alcohol dehydrogenase	ASU28_03280 HR47_06060	Lactobacillus paraplantarum	325	34,244	
A0A098R305	A0A098R305_9LACO	Molecular chaperone GroES (Zn-dependent alcohol dehydrogenase)	ASU28_06905 HR47_12080	Lactobacillus paraplantarum	347	36,747	
A0A098R7N7	A0A098R7N7_9LACO	Alcohol dehydrogenase	ASU28_07925 HR47_04905	Lactobacillus paraplantarum	157	17,801	
A0A0H4LS56	A0A0H4LS56_9LACO	NADP-dependent aryl-alcohol dehydrogenase (Oxidoreductase)	ABB44_06935 ABB45_06925 NBRC111452_1455	Lactobacillus farciminis	336	37,883	
A0A098R5R4	A0A098R5R4_9LACO	Alcohol dehydrogenase	ASU28_10150 HR47_13175	Lactobacillus paraplantarum	342	36,508	
A0A098R7F1	A0A098R7F1_9LACO	Alcohol dehydrogenase	ASU28_03600 HR47_06390	Lactobacillus paraplantarum	304	32,694	
A0A061BVN6	A0A061BVN6_LACDE	Iron-containing alcohol dehydrogenase (Uncharacterized protein)	AT236_00892 CFL1_01105 SB57_01810	Lactobacillus delbrueckii subsp. bulgaricus	128	14,708	
A0A0M4H690	A0A0M4H690_STRTR	Alcohol dehydrogenase (Molecular chaperone GroES)	ADU38_860 AMD33_03865	Streptococcus thermophilus	345	36,847	
A0A0M4I110	A0A0M4I110_STRTR	Alcohol dehydrogenase Acetaldehyde dehydrogenase (Uncharacterized protein)	ADU38_1918 AMD33_07925	Streptococcus thermophilus	131	14,283	
A0A073JLT6	A0A073JLT6_LACRE	Alcohol dehydrogenase (Alcohol dehydrogenase (GroES-like structure))	HF82_07080 HQ33_01125 LR3_05045 LRATCC53608_0171	Lactobacillus reuteri	336	35,976	
A0A073JN72	A0A073JN72_LACRE	Alcohol dehydrogenase	HF82_02940 LR3_03490	Lactobacillus reuteri	348	37,878	
A0A073JQA3	A0A073JQA3_LACRE	Alcohol dehydrogenase	HF82_03165 HQ33_01635 LR3_03270	Lactobacillus reuteri	342	36,13	
A0A0F4HC66	A0A0F4HC66_LACFE	Butanediol dehydrogenase	UP21_04385 WU68_02870	Lactobacillus fermentum	350	37,225	
A0A0C1PTP4	A0A0C1PTP4_LACBR	2,3-butanediol dehydrogenase, S-alcohol forming, (S)-acetoin-specific (EC 1.1.1.76)	LbDm2_1358 N624_2332	Lactobacillus brevis	253	26,394	
A0A087ENA9	A0A087ENA9_9LACO	Alcohol dehydrogenase (Sorbitol dehydrogenase)	APS55_02990 HW41_07290 JI66_06355 RZ55_04200 RZ70_06930 RZ71_04150 RZ72_03660 RZ73_13580 RZ76_04280 RZ78_02270	Lactobacillus kunkeei	333	35,877	
A0A0C3AEB9	A0A0C3AEB9_9LACO	Alcohol dehydrogenase (Zn-dependent alcohol dehydrogenase)	HW41_05445 RZ55_01130 RZ70_03050 RZ72_00790 RZ73_10510	Lactobacillus kunkeei	338	36,224	
A0A0C1Q8P8	A0A0C1Q8P8_LACBR	2,3-butanediol dehydrogenase, S-alcohol forming, (R)-acetoin-specific (EC 1.1.1.304) (EC 1.1.1.4)	LbDm2_1149 N624_0632	Lactobacillus brevis	259	26,673	
A0A0M9DFF3	A0A0M9DFF3_9LACO	NADH-dependent (S)-specific alcohol dehydrogenase	RZ56_00540 RZ72_06600	Lactobacillus kunkeei	346	36,967	
A0A087EPG3	A0A087EPG3_9LACO	Alcohol dehydrogenase	APS55_04670 JI66_03420	Lactobacillus kunkeei	338	36,238	
V5T713	V5T713_9LACO	L-threonine dehydrogenase (Sorbitol dehydrogenase)	RZ74_12750	Lactobacillus apinorum	333	35,837	
A0A0M9DBX1	A0A0M9DBX1_9LACO	Zn-dependent alcohol dehydrogenase	RZ56_11630 RZ71_01100 RZ76_01130	Lactobacillus kunkeei	338	36,237	
A0A0C1M2W0	A0A0C1M2W0_LACBR	Sorbitol dehydrogenase (EC 1.1.1.14)	LbDm2_1727 N624_0139	Lactobacillus brevis	333	35,695	
A0A0C1PZK9	A0A0C1PZK9_9LACO	Sorbitol dehydrogenase (EC 1.1.1.14) (Threonine dehydrogenase related Zn-dependent dehydrogenase)	IV37_GL001185 LfDm3_1254	Lactobacillus fructivorans	340	37,367	
A0A0C1PP01	A0A0C1PP01_9LACO	Sorbitol dehydrogenase (EC 1.1.1.14) (Threonine dehydrogenase related Zn-dependent dehydrogenase)	IV37_GL000823 LfDm3_0421	Lactobacillus fructivorans	341	37,373	
X0P9X7	X0P9X7_9LACO	2,3-butanediol dehydrogenase, S-alcohol forming, (S)-acetoin-specific (Acetoin dehydrogenase)	FD41_GL000183 JCM14108_788	Lactobacillus farraginis DSM 18382 = JCM 14108	257	27,618	
X0PGX2	X0PGX2_9LACO	Dehydrogenase (Short-chain alcohol dehydrogenase)	FD41_GL001926 JCM14108_1202	Lactobacillus farraginis DSM 18382 = JCM 14108	284	31,291	
X0PKW0	X0PKW0_9LACO	2,3-butanediol dehydrogenase, S-alcohol forming, (R)-acetoin-specific (Acetoin dehydrogenase)	FD41_GL001086 JCM14108_3078	Lactobacillus farraginis DSM 18382 = JCM 14108	257	26,795	
X0PJL1	X0PJL1_9LACO	3-alpha-(Or 20-beta)-hydroxysteroid dehydrogenase (Short-chain alcohol dehydrogenase)	FD41_GL000052 JCM14108_1788	Lactobacillus farraginis DSM 18382 = JCM 14108	252	26,795	
X0QBU6	X0QBU6_9LACO	Alcohol dehydrogenase (Putative oxidoreductase)	FD41_GL001322 JCM14108_1017	Lactobacillus farraginis DSM 18382 = JCM 14108	323	35,225	
X0PJW1	X0PJW1_9LACO	3-alpha-(Or 20-beta)-hydroxysteroid dehydrogenase (Short-chain alcohol dehydrogenase)	FD41_GL002850 JCM14108_1923	Lactobacillus farraginis DSM 18382 = JCM 14108	252	26,758	
X0PIB1	X0PIB1_9LACO	Aryl-alcohol dehydrogenase related enzyme (Dehydrogenase)	FD41_GL001938 JCM14108_1217	Lactobacillus farraginis DSM 18382 = JCM 14108	305	33,564	
X0P9B7	X0P9B7_9LACO	Aryl-alcohol dehydrogenase	FD41_GL001620 JCM14108_432	Lactobacillus farraginis DSM 18382 = JCM 14108	377	40,385	
X0PID6	X0PID6_9LACO	Bifunctional protein: zinc-containing alcohol dehydrogenase (NADPH quinone reductase, zeta-crystallin family protein oxidoreductase protein)	FD41_GL000615 JCM14108_1868	Lactobacillus farraginis DSM 18382 = JCM 14108	305	32,101	
X0PA98	X0PA98_9LACO	Bifunctional protein: zinc-containing alcohol dehydrogenase (NADPH quinone reductase)	FD41_GL001504 JCM14108_1120	Lactobacillus farraginis DSM 18382 = JCM 14108	342	37,662	
X0PAA6	X0PAA6_9LACO	L-threonine 3-dehydrogenase (Sorbitol dehydrogenase)	FD41_GL001482 JCM14108_1148	Lactobacillus farraginis DSM 18382 = JCM 14108	333	35,939	
X0PA92	X0PA92_9LACO	Bifunctional protein: zinc-containing alcohol dehydrogenase (Nadph quinone reductase)	FD41_GL001519 JCM14108_1105	Lactobacillus farraginis DSM 18382 = JCM 14108	305	31,855	
X0PMR9	X0PMR9_9LACO	2,3-butanediol dehydrogenase, S-alcohol forming, (R)-acetoin-specific (Acetoin reductase)	FD41_GL000283 JCM14108_3280	Lactobacillus farraginis DSM 18382 = JCM 14108	257	26,95	
X0PKA2	X0PKA2_9LACO	Aryl-alcohol dehydrogenase (Benzyl alcohol dehydrogenase)	FD41_GL001185 JCM14108_2784	Lactobacillus farraginis DSM 18382 = JCM 14108	364	38,544	
U2PNA4	U2PNA4_LACBR	Putative 2-dehydro-3-deoxy-D-gluconate 5-dehydrogenase (Short-chain alcohol dehydrogenase)	FC61_GL001619 HMPREF0495_00252	Lactobacillus brevis ATCC 14869 = DSM 20054	257	27,747	
X0PFH9	X0PFH9_9LACO	(R,R)-butanediol dehydrogenase (Threonine dehydrogenase)	FD41_GL001708 JCM14108_533	Lactobacillus farraginis DSM 18382 = JCM 14108	356	38,518	
U2QSP2	U2QSP2_LACBR	Putative 3-alpha-(Or 20-beta)-hydroxysteroid dehydrogenase (Short-chain alcohol dehydrogenase)	FC61_GL001870 HMPREF0495_00992	Lactobacillus brevis ATCC 14869 = DSM 20054	257	27,331	
U2QSR6	U2QSR6_LACBR	Putative chlorophyll synthesis pathway protein BchC (Threonine dehydrogenase related Zn-dependent dehydrogenase)	FC61_GL001424 HMPREF0495_02081	Lactobacillus brevis ATCC 14869 = DSM 20054	333	35,695	
U2PED9	U2PED9_LACBR	Oxidoreductase, short chain dehydrogenase/reductase family protein (Short-chain alcohol dehydrogenase)	FC61_GL002149 HMPREF0495_01858	Lactobacillus brevis ATCC 14869 = DSM 20054	264	28,837	
U2NX13	U2NX13_LACBR	NADPH quinone reductase related Zn-dependent oxidoreductase (Zinc-binding alcohol dehydrogenase family protein)	FC61_GL000313 HMPREF0495_01838	Lactobacillus brevis ATCC 14869 = DSM 20054	345	37,826	
U2PMU2	U2PMU2_LACBR	Aryl-alcohol dehydrogenase related enzyme (Oxidoreductase, aldo/keto reductase family protein)	FC61_GL001607 HMPREF0495_00472	Lactobacillus brevis ATCC 14869 = DSM 20054	280	30,895	
U2PK17	U2PK17_LACBR	Aryl-alcohol dehydrogenase related enzyme (Oxidoreductase, aldo/keto reductase family protein)	FC61_GL000503 HMPREF0495_01133	Lactobacillus brevis ATCC 14869 = DSM 20054	335	37,28	
U2P6D5	U2P6D5_LACBR	Acetaldehyde dehydrogenase (Aldehyde-alcohol dehydrogenase)	FC61_GL001102 HMPREF0495_00110	Lactobacillus brevis ATCC 14869 = DSM 20054	491	52,163	
U2PIX0	U2PIX0_LACBR	Putative benzyl alcohol dehydrogenase AreB (Zn-dependent alcohol dehydrogenase)	FC61_GL000506 HMPREF0495_01130	Lactobacillus brevis ATCC 14869 = DSM 20054	364	38,802	
U2PM59	U2PM59_LACBR	Alcohol dehydrogenase (GroES-like protein)	FC61_GL001306 HMPREF0495_00642	Lactobacillus brevis ATCC 14869 = DSM 20054	347	36,928	
U2QHG8	U2QHG8_LACBR	Alcohol dehydrogenase (Alcohol dehydrogenase, propanol-preferring)	FC61_GL001773 HMPREF0495_02613	Lactobacillus brevis ATCC 14869 = DSM 20054	336	35,528	
U2QR42	U2QR42_LACBR	Alcohol dehydrogenase, iron-dependent (NADPH-dependent 1,3-propanediol dehydrogenase)	FC61_GL000705 HMPREF0495_01311	Lactobacillus brevis ATCC 14869 = DSM 20054	373	40,335	
U2NSJ7	U2NSJ7_LACBR	Alcohol dehydrogenase, iron-dependent	FC61_GL001445 HMPREF0495_02543	Lactobacillus brevis ATCC 14869 = DSM 20054	386	41,281	
U2NRL0	U2NRL0_LACBR	Alcohol dehydrogenase (Alcohol dehydrogenase, propanol-preferring)	FC61_GL000621 HMPREF0495_02658	Lactobacillus brevis ATCC 14869 = DSM 20054	338	36,035	
A0A0G9F8P6	A0A0G9F8P6_LACPN	Alcohol dehydrogenase (Oxidoreductase)	AD081_06330 AKJ11_06185 ASU25_01195 IV39_GL002811 JM48_2051	Lactobacillus plantarum	342	36,096	
A0A0G9GJ41	A0A0G9GJ41_LACPN	Alcohol dehydrogenase	AD081_00630 ADS73_14395 AKJ11_12030 ASU25_02705 WP50_37425	Lactobacillus plantarum	164	18,734	
A0A0G9FHC1	A0A0G9FHC1_LACPN	Alcohol dehydrogenase (NADPH quinone reductase) (NADPH:quinone reductase)	AD081_09285 ASU25_13585 IV39_GL002952 JM48_1407	Lactobacillus plantarum	316	34,273	
A0A0G9FA26	A0A0G9FA26_LACPN	Alcohol dehydrogenase (Uncharacterized protein)	AD081_12585 AKJ11_14750 AN634_12055 ASU25_06705 JM48_0692 WP50_34235	Lactobacillus plantarum	157	17,626	
A0A0G9FC63	A0A0G9FC63_LACPN	Alcohol dehydrogenase (Uncharacterized protein)	AD081_09340 AKJ11_03170 AN634_00855 ASU25_13640 IV39_GL002939 WP50_06010	Lactobacillus plantarum	156	17,827	
A0A0G9FDK2	A0A0G9FDK2_LACPN	Alcohol dehydrogenase	AD081_00780 ASU25_02855	Lactobacillus plantarum	304	32,683	
A0A0G9FE57	A0A0G9FE57_LACPN	L-iditol 2-dehydrogenase (Sorbitol dehydrogenase)	AD081_14650 AKJ11_10790 IV39_GL001831 JM48_3028	Lactobacillus plantarum	369	40,055	
A0A0R2GFS8	A0A0R2GFS8_LACPN	Alcohol dehydrogenase (Oxidoreductase)	AD081_00450 ASU25_02525 IV39_GL000115	Lactobacillus plantarum	325	34,045	
A0A0G9FE01	A0A0G9FE01_LACPN	Alcohol dehydrogenase (Alcohol dehydrogenase, zinc-binding)	AD081_09865 ASU25_07770 IV39_GL000383 WP50_19140	Lactobacillus plantarum	343	37,616	
A0A0P8YIT7	A0A0P8YIT7_LACPN	Alcohol dehydrogenase (Molecular chaperone GroES) (Zn-dependent alcohol dehydrogenase)	AD081_09265 ASU25_13565 IV39_GL002956	Lactobacillus plantarum	347	36,754	
A0A0G9FGD1	A0A0G9FGD1_LACPN	Aryl-alcohol dehydrogenase	AD081_03250 AKJ11_08960 IV39_GL001305	Lactobacillus plantarum	373	40,018	
A0A0M3QBU2	A0A0M3QBU2_LACPN	Alcohol dehydrogenase (Molecular chaperone GroES) (Zn-dependent alcohol dehydrogenase)	AD081_04000 ASU25_11005 IV39_GL001145 JM48_2477	Lactobacillus plantarum	346	36,692	
V5T8B4	V5T8B4_9LACO	Aldo-keto reductase (Aryl-alcohol dehydrogenase related enzyme)	JG29_09000	Lactobacillus mellis	313	35,026	
A0A0R1RJP2	A0A0R1RJP2_9LACO	Short-chain alcohol dehydrogenase	FD35_GL001197	Lactobacillus rossiae DSM 15814	307	33,543	
A0A0R1RAR0	A0A0R1RAR0_9LACO	Alcohol dehydrogenase	FD35_GL000876	Lactobacillus rossiae DSM 15814	342	37,856	
A0A0R1RJ64	A0A0R1RJ64_9LACO	Benzyl alcohol dehydrogenase AreB	FD35_GL002695	Lactobacillus rossiae DSM 15814	402	43,354	
A0A0R1R9R3	A0A0R1R9R3_9LACO	Alcohol dehydrogenase GroES domain protein	FD35_GL000855	Lactobacillus rossiae DSM 15814	340	35,887	
K6QK95	K6QK95_LACCA	Short-chain alcohol dehydrogenase (EC 1.-.-.-)	LCA211_1172	Lactobacillus casei 21/1	237	24,374	
A0A0R1R8V1	A0A0R1R8V1_9LACO	Iron-containing alcohol dehydrogenase	FD35_GL001023	Lactobacillus rossiae DSM 15814	396	43,035	
A0A0R1REC9	A0A0R1REC9_9LACO	Chlorophyll synthesis pathway protein BchC	FD35_GL001483	Lactobacillus rossiae DSM 15814	336	35,893	
A0A0R1RH13	A0A0R1RH13_9LACO	Threonine dehydrogenase related Zn-dependent dehydrogenase	FD35_GL001047	Lactobacillus rossiae DSM 15814	346	36,739	
A0A125U8S7	A0A125U8S7_LACCD	Zinc alcohol dehydrogenase, putative	LCBD_1729	Lactobacillus casei (strain BD-II)	305	32,86	
A0A125UCF6	A0A125UCF6_LACCD	Alcohol dehydrogenase, iron-containing	LCBD_2288	Lactobacillus casei (strain BD-II)	397	43,234	
K6R064	K6R064_LACCA	Short-chain alcohol dehydrogenase (EC 1.-.-.-)	LCAM36_1505	Lactobacillus casei M36	237	24,374	
K6RR84	K6RR84_LACCA	Short-chain alcohol dehydrogenase (EC 1.-.-.-)	LCAM36_1239	Lactobacillus casei M36	286	31,791	
A0A0R1RA17	A0A0R1RA17_9LACO	Alcohol dehydrogenase	FD35_GL001043	Lactobacillus rossiae DSM 15814	342	36,823	
K6QGA7	K6QGA7_LACCA	Short-chain alcohol dehydrogenase (EC 1.-.-.-) (EC 1.1.1.125)	LCAM36_0355	Lactobacillus casei M36	274	29,793	
K6Q526	K6Q526_LACCA	Short-chain alcohol dehydrogenase (EC 1.-.-.-)	LCA211_0702	Lactobacillus casei 21/1	286	31,791	
A0A0R1RSR6	A0A0R1RSR6_9LACO	Short-chain alcohol dehydrogenase	FD35_GL001949	Lactobacillus rossiae DSM 15814	246	26,472	
A0A0R1RFQ9	A0A0R1RFQ9_9LACO	Alcohol dehydrogenase zinc-binding domain-containing protein	FD35_GL002336	Lactobacillus rossiae DSM 15814	316	33,552	
A0A0R1RB77	A0A0R1RB77_9LACO	Benzyl alcohol dehydrogenase	FD35_GL002693	Lactobacillus rossiae DSM 15814	366	38,676	
A0A125U6D5	A0A125U6D5_LACCD	Alcohol dehydrogenase, zinc-containing	LCBD_0509	Lactobacillus casei (strain BD-II)	340	37,336	
K6RK62	K6RK62_LACCA	Short-chain alcohol dehydrogenase (EC 1.-.-.-)	LCAM36_0411	Lactobacillus casei M36	277	30,196	
A0A125U8D0	A0A125U8D0_LACCD	Zinc-containing alcohol dehydrogenase superfamily	LCBD_1890	Lactobacillus casei (strain BD-II)	322	34,763	
A0A0R1RAK4	A0A0R1RAK4_9LACO	Alcohol dehydrogenase, iron-dependent	FD35_GL000649	Lactobacillus rossiae DSM 15814	385	41,595	
A0A0R1RPC1	A0A0R1RPC1_9LACO	Alcohol dehydrogenase	FD35_GL002410	Lactobacillus rossiae DSM 15814	346	36,817	
K6QYA8	K6QYA8_LACCA	Alcohol dehydrogenase (EC 1.-.-.-) (EC 1.1.1.1)	LCAM36_1387	Lactobacillus casei M36	346	36,863	
A0A0R1RFS0	A0A0R1RFS0_9LACO	Zinc-containing alcohol dehydrogenase (Oxidoreductase)	FD35_GL001426	Lactobacillus rossiae DSM 15814	327	35,437	
A0A0R1V2Z2	A0A0R1V2Z2_9LACO	Aryl-alcohol dehydrogenase related enzyme	FD50_GL001181	Lactobacillus satsumensis DSM 16230 = JCM 12392	286	31,932	
K6QDH0	K6QDH0_LACCA	Aryl-alcohol dehydrogenase-related enzyme	LCAM36_1593	Lactobacillus casei M36	158	17,392	
K6QTF0	K6QTF0_LACCA	Aryl-alcohol dehydrogenase-related enzyme	LCA211_3025	Lactobacillus casei 21/1	309	34,031	
A0A0R1UUX6	A0A0R1UUX6_9LACO	Aryl-alcohol dehydrogenase	FD50_GL001918	Lactobacillus satsumensis DSM 16230 = JCM 12392	371	39,719	
K6PH26	K6PH26_LACCA	Zinc-containing alcohol dehydrogenase/quinone oxidoreductase [NADPH] (EC 1.-.-.-) (EC 1.1.1.-)	LCA211_2533	Lactobacillus casei 21/1	292	31,763	
K6QUC8	K6QUC8_LACCA	Zinc-binding alcohol dehydrogenase (EC 1.-.-.-) (EC 1.1.1.-)	LCA211_1423	Lactobacillus casei 21/1	340	37,278	
A0A0R1UVN2	A0A0R1UVN2_9LACO	Alcohol dehydrogenase, zinc-binding protein	FD50_GL001823	Lactobacillus satsumensis DSM 16230 = JCM 12392	342	37,9	
A0A0R1V1Z9	A0A0R1V1Z9_9LACO	Aryl-alcohol dehydrogenase related enzyme	FD50_GL001156	Lactobacillus satsumensis DSM 16230 = JCM 12392	308	34,309	
K6Q417	K6Q417_LACCA	Zn-dependent dehydrogenase (EC 1.-.-.-)	LCA211_3026	Lactobacillus casei 21/1	360	38,594	
A0A0R1V0R6	A0A0R1V0R6_9LACO	Threonine dehydrogenase or related Zn-dependent dehydrogenase	FD50_GL000363	Lactobacillus satsumensis DSM 16230 = JCM 12392	361	38,467	
K6R1M1	K6R1M1_LACCA	Zinc-binding alcohol dehydrogenase (EC 1.-.-.-)	LCAM36_1857	Lactobacillus casei M36	356	38,393	
K6RG20	K6RG20_LACCA	Zinc-containing alcohol dehydrogenase/quinone oxidoreductase [NADPH] (EC 1.-.-.-) (EC 1.1.1.-)	LCAM36_1231	Lactobacillus casei M36	340	36,17	
K6RBZ8	K6RBZ8_LACCA	Zinc-containing alcohol dehydrogenase/quinone oxidoreductase [NADPH] (EC 1.-.-.-) (EC 1.1.1.-)	LCAM36_1910	Lactobacillus casei M36	345	37,605	
K6R3B6	K6R3B6_LACCA	Zinc-containing alcohol dehydrogenase/quinone oxidoreductase [NADPH] (EC 1.-.-.-) (EC 1.1.1.-)	LCAM36_1682	Lactobacillus casei M36	165	18,196	
K6QBI7	K6QBI7_LACCA	Zn-dependent dehydrogenase (EC 1.-.-.-)	LCAM36_2174	Lactobacillus casei M36	360	38,594	
K6QFG8	K6QFG8_LACCA	Aryl-alcohol dehydrogenase-related enzyme	LCA211_0577	Lactobacillus casei 21/1	334	37,047	
K6QJ63	K6QJ63_LACCA	Alcohol dehydrogenase (EC 1.-.-.-) (EC 1.1.1.1)	LCA211_2146	Lactobacillus casei 21/1	282	29,887	
K6QL40	K6QL40_LACCA	Zinc-containing alcohol dehydrogenase/quinone oxidoreductase [NADPH] (EC 1.-.-.-) (EC 1.1.1.-)	LCA211_0709	Lactobacillus casei 21/1	340	36,17	
A0A0R1V2R1	A0A0R1V2R1_9LACO	L-iditol 2-dehydrogenase	FD50_GL001825	Lactobacillus satsumensis DSM 16230 = JCM 12392	359	38,696	
K6Q516	K6Q516_LACCA	Alcohol dehydrogenase (EC 1.-.-.-) (EC 1.1.1.1)	LCA211_0692	Lactobacillus casei 21/1	319	33,381	
A0A0R1V1I4	A0A0R1V1I4_9LACO	Alcohol dehydrogenase	FD50_GL000246	Lactobacillus satsumensis DSM 16230 = JCM 12392	333	35,7	
K6QG35	K6QG35_LACCA	Aryl-alcohol dehydrogenase-related enzyme	LCAM36_0300	Lactobacillus casei M36	334	37,02	
K6RGX4	K6RGX4_LACCA	Zinc-containing alcohol dehydrogenase/quinone oxidoreductase [NADPH] (EC 1.-.-.-) (EC 1.1.1.-)	LCAM36_1081	Lactobacillus casei M36	302	31,478	
K6QQN4	K6QQN4_LACCA	Zinc-containing alcohol dehydrogenase/quinone oxidoreductase [NADPH] (EC 1.-.-.-) (EC 1.1.1.-)	LCA211_1818	Lactobacillus casei 21/1	322	34,706	
K6QU47	K6QU47_LACCA	Zinc-containing alcohol dehydrogenase/quinone oxidoreductase [NADPH] (EC 1.-.-.-) (EC 1.1.1.-)	LCA211_0636	Lactobacillus casei 21/1	302	31,463	
K6RL08	K6RL08_LACCA	Zinc-containing alcohol dehydrogenase/quinone oxidoreductase [NADPH] (EC 1.-.-.-) (EC 1.1.1.-)	LCAM36_0942	Lactobacillus casei M36	322	34,724	
A0A0R1V557	A0A0R1V557_9LACO	Zinc-containing alcohol dehydrogenase	FD50_GL001552	Lactobacillus satsumensis DSM 16230 = JCM 12392	313	33,542	
A0A0R1UWW0	A0A0R1UWW0_9LACO	Iron-containing alcohol dehydrogenase	FD50_GL001141	Lactobacillus satsumensis DSM 16230 = JCM 12392	391	42,475	
K6RBA4	K6RBA4_LACCA	Aryl-alcohol dehydrogenase-related enzyme	LCAM36_1594	Lactobacillus casei M36	130	14,607	
K6QNM0	K6QNM0_LACCA	Alcohol dehydrogenase GroES-like protein (EC 1.-.-.-)	LCA211_2504	Lactobacillus casei 21/1	334	36,636	
K6RG37	K6RG37_LACCA	Alcohol dehydrogenase (EC 1.-.-.-) (EC 1.1.1.1)	LCAM36_1246	Lactobacillus casei M36	319	33,381	
E3C612	E3C612_9LACO	GroES-like protein (EC 1.1.1.1)	adhP HMPREF9265_2025	Lactobacillus oris PB013-T2-3	340	36,048	
E3CA36	E3CA36_9LACO	Putative chlorophyll synthesis pathway protein BchC	HMPREF9265_0456	Lactobacillus oris PB013-T2-3	337	36,193	
E3CAP7	E3CAP7_9LACO	Alcohol dehydrogenase, iron-dependent (EC 1.1.1.1)	HMPREF9265_0054	Lactobacillus oris PB013-T2-3	383	41,758	
E3C9B5	E3C9B5_9LACO	Zinc-binding alcohol dehydrogenase family protein (EC 1.-.-.-)	HMPREF9265_1038	Lactobacillus oris PB013-T2-3	348	37,532	
E3C952	E3C952_9LACO	Putative chlorophyll synthesis pathway protein BchC	HMPREF9265_1723	Lactobacillus oris PB013-T2-3	339	36,767	
E3C5S6	E3C5S6_9LACO	GroES-like protein	areB HMPREF9265_1683	Lactobacillus oris PB013-T2-3	330	35,225	
S2R018	S2R018_LACPA	Short-chain alcohol dehydrogenase	Lpp126_15180	Lactobacillus paracasei subsp. paracasei Lpp126	277	30,196	
E3C5T5	E3C5T5_9LACO	Alcohol dehydrogenase, iron-dependent (EC 1.1.1.1)	dhaT HMPREF9265_1656	Lactobacillus oris PB013-T2-3	390	42,194	
K6S543	K6S543_LACCA	Short-chain alcohol dehydrogenase (EC 1.-.-.-) (EC 1.1.1.125)	LCAUCD174_2883	Lactobacillus casei UCD174	274	29,866	
K6SCB1	K6SCB1_LACCA	Short-chain alcohol dehydrogenase (EC 1.-.-.-)	LCAUCD174_0501	Lactobacillus casei UCD174	277	30,215	
S2S4H9	S2S4H9_LACPA	Short-chain alcohol dehydrogenase	Lpp126_03776	Lactobacillus paracasei subsp. paracasei Lpp126	311	34,111	
K6RAL4	K6RAL4_LACCA	Short-chain alcohol dehydrogenase (EC 1.-.-.-)	LCAUCD174_2237	Lactobacillus casei UCD174	237	24,335	
S2TCE7	S2TCE7_LACPA	Short-chain alcohol dehydrogenase	Lpp126_00637	Lactobacillus paracasei subsp. paracasei Lpp126	247	26,809	
S2RGY3	S2RGY3_LACPA	Putative zinc-type alcohol dehydrogenase-like protein AdhB	Lpp126_06982	Lactobacillus paracasei subsp. paracasei Lpp126	116	12,476	
S2RUK6	S2RUK6_LACPA	Alcohol dehydrogenase (Fragment)	Lpp126_15964	Lactobacillus paracasei subsp. paracasei Lpp126	204	21,575	
S2RHL1	S2RHL1_LACPA	Bifunctional acetaldehyde-CoA/alcohol dehydrogenase (Fragment)	Lpp126_06882	Lactobacillus paracasei subsp. paracasei Lpp126	221	23,696	
S2TB02	S2TB02_LACPA	Alcohol dehydrogenase	Lpp126_01419	Lactobacillus paracasei subsp. paracasei Lpp126	373	39,907	
K6RWR0	K6RWR0_LACCA	Zinc-containing alcohol dehydrogenase/quinone oxidoreductase (EC 1.-.-.-) (EC 1.1.1.-)	LCAUCD174_2428	Lactobacillus casei UCD174	322	34,723	
K6RDZ1	K6RDZ1_LACCA	Zinc-containing alcohol dehydrogenase/quinone oxidoreductase (EC 1.-.-.-) (EC 1.1.1.-)	LCAUCD174_1620	Lactobacillus casei UCD174	305	32,86	
G2KUJ5	G2KUJ5_LACSM	Alcohol dehydrogenase 1 (EC 1.1.1.1)	adhA LSA_12190	Lactobacillus sanfranciscensis (strain TMW 1.1304)	366	39,048	
K6SKN2	K6SKN2_LACCA	Zinc-containing alcohol dehydrogenase/quinone oxidoreductase (EC 1.-.-.-) (EC 1.1.1.-)	LCAUCD174_0671	Lactobacillus casei UCD174	302	31,41	
K6RLA8	K6RLA8_LACCA	Zinc-containing alcohol dehydrogenase/quinone oxidoreductase (EC 1.-.-.-) (EC 1.1.1.-)	LCAUCD174_0735	Lactobacillus casei UCD174	340	36,151	
A0A099YAI5	A0A099YAI5_9LACO	Alcohol dehydrogenase	LX03_02465	Lactobacillus mucosae	340	35,836	
K6S4M0	K6S4M0_LACCA	Aryl-alcohol dehydrogenase-related enzyme	LCAUCD174_2994	Lactobacillus casei UCD174	309	34,021	
S2RUH1	S2RUH1_LACPA	Bifunctional acetaldehyde-CoA/alcohol dehydrogenase (Fragment)	Lpp126_05540	Lactobacillus paracasei subsp. paracasei Lpp126	192	20,337	
S2RBC2	S2RBC2_LACPA	Alcohol-acetaldehyde dehydrogenase (Fragment)	Lpp126_10863	Lactobacillus paracasei subsp. paracasei Lpp126	365	39,724	
S2RM99	S2RM99_LACPA	Bifunctional acetaldehyde-CoA/alcohol dehydrogenase	Lpp126_06710	Lactobacillus paracasei subsp. paracasei Lpp126	35	3,987	
K6RUZ9	K6RUZ9_LACCA	Aryl-alcohol dehydrogenase-related enzyme	LCAUCD174_2850	Lactobacillus casei UCD174	334	37,036	
A0A099YEN3	A0A099YEN3_9LACO	Uncharacterized protein	LX03_04985	Lactobacillus mucosae	147	16,01	
S2R3K0	S2R3K0_LACPA	Zinc-containing alcohol dehydrogenase superfamily protein	Lpp126_14141	Lactobacillus paracasei subsp. paracasei Lpp126	58	6,311	
K6S8R0	K6S8R0_LACCA	Alcohol dehydrogenase (EC 1.-.-.-) (EC 1.1.1.1)	LCAUCD174_0689	Lactobacillus casei UCD174	319	33,41	
A0A099YAZ8	A0A099YAZ8_9LACO	Alcohol dehydrogenase	LX03_08195	Lactobacillus mucosae	348	37,983	
S2S446	S2S446_LACPA	Zinc-type alcohol dehydrogenase-like protein (Fragment)	Lpp126_03976	Lactobacillus paracasei subsp. paracasei Lpp126	103	11,45	
G2KTC3	G2KTC3_LACSM	Uncharacterized protein	LSA_02820	Lactobacillus sanfranciscensis (strain TMW 1.1304)	337	36,734	
A0A099Y7H0	A0A099Y7H0_9LACO	Aldehyde-alcohol dehydrogenase	LX03_11540	Lactobacillus mucosae	879	96,656	
K6SC33	K6SC33_LACCA	Zinc-binding alcohol dehydrogenase (EC 1.-.-.-) (EC 1.1.1.-)	LCAUCD174_0484	Lactobacillus casei UCD174	340	37,295	
K6RXV2	K6RXV2_LACCA	Alcohol dehydrogenase (EC 1.-.-.-) (EC 1.1.1.1)	LCAUCD174_2405	Lactobacillus casei UCD174	346	36,819	
X0PG85	X0PG85_9LACO	Zinc-binding alcohol dehydrogenase	FC83_GL000990	Lactobacillus composti DSM 18527 = JCM 14202	337	35,003	
X0PHK7	X0PHK7_9LACO	Alcohol dehydrogenase	FC83_GL000970	Lactobacillus composti DSM 18527 = JCM 14202	357	38,798	
S2R391	S2R391_LACPA	L-iditol 2-dehydrogenase	Lpp126_14276	Lactobacillus paracasei subsp. paracasei Lpp126	356	38,393	
A0A0R1XRP6	A0A0R1XRP6_9LACO	Aryl-alcohol dehydrogenase family enzyme	FC83_GL000150	Lactobacillus composti DSM 18527 = JCM 14202	330	36,786	
A0A0R1Y245	A0A0R1Y245_9LACO	Alcohol dehydrogenase, zinc-binding protein	FC83_GL001875	Lactobacillus composti DSM 18527 = JCM 14202	351	38,646	
A0A0R1XUR3	A0A0R1XUR3_9LACO	Alcohol dehydrogenase GroES domain protein	FC83_GL001559	Lactobacillus composti DSM 18527 = JCM 14202	333	36,365	
A0A0R1XPB6	A0A0R1XPB6_9LACO	Aryl-alcohol dehydrogenase	FC83_GL001583	Lactobacillus composti DSM 18527 = JCM 14202	373	39,988	
A0A0R1XLB1	A0A0R1XLB1_9LACO	Alcohol dehydrogenase	FC83_GL001025	Lactobacillus composti DSM 18527 = JCM 14202	352	38,319	
X0PN39	X0PN39_9LACO	Short-chain alcohol dehydrogenase	FC83_GL001729	Lactobacillus composti DSM 18527 = JCM 14202	255	26,646	
A0A0R1XRD6	A0A0R1XRD6_9LACO	Iron-containing alcohol dehydrogenase	FC83_GL000210	Lactobacillus composti DSM 18527 = JCM 14202	382	40,662	
X0PN65	X0PN65_9LACO	L-threonine 3-dehydrogenase	FC83_GL001629	Lactobacillus composti DSM 18527 = JCM 14202	332	35,699	
A0A0R1XKS8	A0A0R1XKS8_9LACO	Short-chain alcohol dehydrogenase	FC83_GL001374	Lactobacillus composti DSM 18527 = JCM 14202	251	27,043	
X0PWP3	X0PWP3_9LACO	Ethanol-active dehydrogenase acetaldehyde-active reductase	FC83_GL002682	Lactobacillus composti DSM 18527 = JCM 14202	339	36,004	
X0PEN4	X0PEN4_9LACO	Zinc-containing alcohol dehydrogenase (Oxidoreductase)	FC83_GL001290	Lactobacillus composti DSM 18527 = JCM 14202	332	35,896	
A0A0R1XPA7	A0A0R1XPA7_9LACO	Aryl-alcohol dehydrogenase	FC83_GL001567	Lactobacillus composti DSM 18527 = JCM 14202	373	39,898	
X0PQS3	X0PQS3_9LACO	Alcohol dehydrogenase	FC83_GL000447	Lactobacillus composti DSM 18527 = JCM 14202	346	36,419	
X0PCI2	X0PCI2_9LACO	Alcohol dehydrogenase zinc-binding domain-containing protein	FC83_GL001726	Lactobacillus composti DSM 18527 = JCM 14202	312	33,116	
A0A0R1ZV48	A0A0R1ZV48_9LACO	Ethanol-active dehydrogenase acetaldehyde-active reductase	FC30_GL000004	Lactobacillus animalis KCTC 3501 = DSM 20602	338	35,504	
A0A0R2A288	A0A0R2A288_9LACO	Alcohol dehydrogenase superfamily,zinc-containing protein	FC30_GL001073	Lactobacillus animalis KCTC 3501 = DSM 20602	354	37,747	
A0A0R1X5R3	A0A0R1X5R3_9LACO	Alcohol dehydrogenase	FD32_GL000835	Lactobacillus panis DSM 6035	328	35,083	
A0A0R1X868	A0A0R1X868_9LACO	NADP-dependent alcohol dehydrogenase	FD32_GL000565	Lactobacillus panis DSM 6035	356	38	
A0A0R1X9J3	A0A0R1X9J3_9LACO	Alcohol dehydrogenase	FD32_GL000335	Lactobacillus panis DSM 6035	340	36,077	
A0A0R1GF65	A0A0R1GF65_9LACO	Ethanol-active dehydrogenase acetaldehyde-active reductase	FC07_GL001906	Lactobacillus bifermentans DSM 20003	338	35,475	
A0A0R1GGR6	A0A0R1GGR6_9LACO	Sorbitol dehydrogenase	FC07_GL001235	Lactobacillus bifermentans DSM 20003	351	38,609	
A0A0R1GSW5	A0A0R1GSW5_9LACO	Aryl-alcohol dehydrogenase	FC07_GL002897	Lactobacillus bifermentans DSM 20003	373	39,861	
A0A0R1GGM2	A0A0R1GGM2_9LACO	L-iditol 2-dehydrogenase	FC07_GL001234	Lactobacillus bifermentans DSM 20003	356	38,631	
A0A0R1XF59	A0A0R1XF59_9LACO	Iron-containing alcohol dehydrogenase	FD32_GL001655	Lactobacillus panis DSM 6035	375	40,012	
A0A0R1XER5	A0A0R1XER5_9LACO	Alcohol dehydrogenase class IV	FD32_GL001717	Lactobacillus panis DSM 6035	373	40,186	
A0A0R1XB75	A0A0R1XB75_9LACO	GroES-like protein	FD32_GL000863	Lactobacillus panis DSM 6035	258	27,135	
A0A0R1XRG0	A0A0R1XRG0_9LACO	Chlorophyll synthesis pathway protein BchC	FD32_GL001527	Lactobacillus panis DSM 6035	337	36,118	
A0A0R1H391	A0A0R1H391_9LACO	Short-chain alcohol dehydrogenase	FC07_GL003083	Lactobacillus bifermentans DSM 20003	237	24,487	
A0A0R1H0E0	A0A0R1H0E0_9LACO	Alcohol dehydrogenase	FC07_GL002186	Lactobacillus bifermentans DSM 20003	345	36,199	
A0A0R1HA71	A0A0R1HA71_9LACO	Short-chain alcohol dehydrogenase	FC07_GL000275	Lactobacillus bifermentans DSM 20003	252	26,767	
A0A0R1GYN8	A0A0R1GYN8_9LACO	Aryl-alcohol dehydrogenase related enzyme	FC07_GL002435	Lactobacillus bifermentans DSM 20003	280	30,63	
A0A0R1H384	A0A0R1H384_9LACO	Zinc-containing alcohol dehydrogenase (Oxidoreductase)	FC07_GL001687	Lactobacillus bifermentans DSM 20003	335	35,672	
A0A0R1GZ19	A0A0R1GZ19_9LACO	Alcohol dehydrogenase GroES domain-containing protein	FC07_GL002367	Lactobacillus bifermentans DSM 20003	322	34,681	
A0A0R1XE17	A0A0R1XE17_9LACO	Uncharacterized protein	FD32_GL001751	Lactobacillus panis DSM 6035	339	36,707	
A0A0R1XR74	A0A0R1XR74_9LACO	Groes-like protein	FD32_GL000622	Lactobacillus panis DSM 6035	346	36,812	
A0A0R1H7L4	A0A0R1H7L4_9LACO	Alcohol dehydrogenase GroES domain protein	FC07_GL002467	Lactobacillus bifermentans DSM 20003	347	36,771	
A0A0R1X6B2	A0A0R1X6B2_9LACO	Aryl-alcohol dehydrogenase	FD32_GL000714	Lactobacillus panis DSM 6035	373	39,997	
A0A0R1HES5	A0A0R1HES5_LACAM	Aryl-alcohol dehydrogenase	FC63_GL001207	Lactobacillus amylovorus DSM 20531	102	11,269	
A0A0R1H5E0	A0A0R1H5E0_LACAM	Aryl-alcohol dehydrogenase	FC63_GL001206	Lactobacillus amylovorus DSM 20531	196	21,414	
A0A0R1X1U4	A0A0R1X1U4_9LACO	Alcohol dehydrogenase	FC93_GL000465	Lactobacillus kefiranofaciens subsp. kefiranofaciens DSM 5016 = JCM 6985	204	21,526	
A0A0R1WUH1	A0A0R1WUH1_9LACO	Uncharacterized protein	FC93_GL000466	Lactobacillus kefiranofaciens subsp. kefiranofaciens DSM 5016 = JCM 6985	126	13,943	
A0A0R1WX84	A0A0R1WX84_9LACO	Aryl-alcohol dehydrogenase	FC93_GL001722	Lactobacillus kefiranofaciens subsp. kefiranofaciens DSM 5016 = JCM 6985	373	40,18	
A0A023CY32	A0A023CY32_9LACO	Aryl-alcohol dehydrogenase-like protein	FD15_GL000870	Lactobacillus sucicola DSM 21376 = JCM 15457	330	37,288	
A0A0R2E3E0	A0A0R2E3E0_9LACO	Alcohol dehydrogenase, zinc-binding protein	FD15_GL000469	Lactobacillus sucicola DSM 21376 = JCM 15457	341	37,904	
A0A023CXW1	A0A023CXW1_9LACO	Aryl-alcohol dehydrogenase	FD15_GL000436	Lactobacillus sucicola DSM 21376 = JCM 15457	372	39,971	
F8KD50	F8KD50_LACRE	Alcohol dehydrogenase	LRATCC53608_0766	Lactobacillus reuteri ATCC 53608	251	26,925	
A0A023CXD2	A0A023CXD2_9LACO	L-iditol 2-dehydrogenase	FD15_GL000562	Lactobacillus sucicola DSM 21376 = JCM 15457	356	38,463	
R9G8Q3	R9G8Q3_LACSK	Zinc-containing alcohol dehydrogenase (EC 1.6.5.5)	LS25_1974	Lactobacillus sakei subsp. sakei LS25	313	33,167	
A0A023CY91	A0A023CY91_9LACO	Aryl-alcohol dehydrogenase related enzyme	FD15_GL000896	Lactobacillus sucicola DSM 21376 = JCM 15457	305	33,89	
F8KCW5	F8KCW5_LACRE	Alcohol dehydrogenase	LRATCC53608_0678	Lactobacillus reuteri ATCC 53608	348	37,868	
R9G9E1	R9G9E1_LACSK	Alcohol dehydrogenase (EC 1.1.1.1)	LS25_1438	Lactobacillus sakei subsp. sakei LS25	331	35,708	
R9GAH0	R9GAH0_LACSK	Alcohol dehydrogenase (EC 1.1.1.1)	LS25_1011	Lactobacillus sakei subsp. sakei LS25	346	36,334	
R9GAC5	R9GAC5_LACSK	Zinc-binding alcohol dehydrogenase family protein	LS25_1105	Lactobacillus sakei subsp. sakei LS25	343	38,359	
R9GCL9	R9GCL9_LACSK	Alcohol dehydrogenase (EC 1.1.1.1)	LS25_0309	Lactobacillus sakei subsp. sakei LS25	383	41,58	
R9G9H0	R9G9H0_LACSK	Zinc-containing alcohol dehydrogenase (Oxidoreductase)	LS25_1468	Lactobacillus sakei subsp. sakei LS25	311	33,702	
R9G8J1	R9G8J1_LACSK	Alcohol dehydrogenase (EC 1.1.1.1)	LS25_1792	Lactobacillus sakei subsp. sakei LS25	337	35,696	
R9G8G9	R9G8G9_LACSK	Zinc-containing alcohol dehydrogenase	LS25_1917	Lactobacillus sakei subsp. sakei LS25	317	34,306	
F8KDP4	F8KDP4_LACRE	Mannitol-2-dehydrogenase	LRATCC53608_0963	Lactobacillus reuteri ATCC 53608	336	35,976	
F8KCS7	F8KCS7_LACRE	Alcohol dehydrogenase	LRATCC53608_0640	Lactobacillus reuteri ATCC 53608	342	36,158	
R9GC60	R9GC60_LACSK	Aryl-alcohol dehydrogenase (EC 1.1.1.1)	LS25_0607	Lactobacillus sakei subsp. sakei LS25	372	39,844	
R9G7U8	R9G7U8_LACSK	Zinc-containing alcohol dehydrogenase	LS25_1921	Lactobacillus sakei subsp. sakei LS25	327	35,629	
R9G8J2	R9G8J2_LACSK	Zinc-dependent alcohol dehydrogenase-like protein	LS25_2017	Lactobacillus sakei subsp. sakei LS25	41	4,511	
F0HUN5	F0HUN5_LACDL	Aldehyde-alcohol dehydrogenase (EC 1.1.1.1)	adhE HMPREF5505_0632	Lactobacillus delbrueckii subsp. lactis DSM 20072	464	50,271	
A0A0R1JG69	A0A0R1JG69_LACDL	Aldehyde-alcohol dehydrogenase	FC10_GL001099	Lactobacillus delbrueckii subsp. lactis DSM 20072	477	51,801	
Q74JI7	Q74JI7_LACJO	Uncharacterized protein	LJ_1120	Lactobacillus johnsonii (strain CNCM I-12250 / La1 / NCC 533)	346	37,331	
A0A0B2XKI1	A0A0B2XKI1_LACCU	Zinc-binding alcohol dehydrogenase family protein	OA78_2225	Lactobacillus curvatus	165	18,583	
A0A0B2XJ32	A0A0B2XJ32_LACCU	Alcohol dehydrogenase GroES-like domain protein	OA78_2267	Lactobacillus curvatus	317	34,113	
A0A0B2XLH2	A0A0B2XLH2_LACCU	Alcohol dehydrogenase GroES-like domain protein	OA78_1388	Lactobacillus curvatus	336	36,736	
A0A0B2XKW5	A0A0B2XKW5_LACCU	Zinc-containing alcohol dehydrogenase	OA78_0625	Lactobacillus curvatus	305	32,884	
A0A0B2XLR4	A0A0B2XLR4_LACCU	Putative zinc-containing alcohol dehydrogenase	OA78_1286	Lactobacillus curvatus	327	35,351	
A0A0B2XAQ0	A0A0B2XAQ0_LACCU	Zinc-binding alcohol dehydrogenase family protein	OA78_2227	Lactobacillus curvatus	146	15,885	
A0A0B2XPE0	A0A0B2XPE0_LACCU	Uncharacterized protein	OA78_0220	Lactobacillus curvatus	227	24,397	
A0A0B2XMI6	A0A0B2XMI6_LACCU	Alcohol dehydrogenase GroES-like domain protein	OA78_1420	Lactobacillus curvatus	311	33,787	
A0A0B2XJ47	A0A0B2XJ47_LACCU	Alcohol dehydrogenase GroES-like domain protein	OA78_2257	Lactobacillus curvatus	345	36,316	
R9X5T1	R9X5T1_LACPN	Alcohol dehydrogenase	Lp16_2268	Lactobacillus plantarum 16	346	36,709	
R9X6R3	R9X6R3_LACPN	Aryl-alcohol dehydrogenase	Lp16_2405	Lactobacillus plantarum 16	373	39,988	
M4KR55	M4KR55_LACPN	Uncharacterized protein (EC 1.1.1.1)	zj316_2320	Lactobacillus plantarum ZJ316	342	36,096	
R9WZN2	R9WZN2_LACPN	Medium chain dehydrogenases/reductase (MDR)/zinc-dependent alcohol dehydrogenase-like family protein	Lp16_0103	Lactobacillus plantarum 16	325	34,112	
R9WY57	R9WY57_LACPN	Medium chain dehydrogenases/reductase (MDR)/zinc-dependent alcohol dehydrogenase-like family protein	Lp16_0174	Lactobacillus plantarum 16	304	32,728	
M4KL10	M4KL10_LACPN	Uncharacterized protein (EC 1.1.1.90)	zj316_2913	Lactobacillus plantarum ZJ316	373	40,018	
R9X705	R9X705_LACPN	Aryl-alcohol dehydrogenase	Lp16_G006	Lactobacillus plantarum 16	373	39,817	
M4KDG4	M4KDG4_LACPN	GutB protein (EC 1.1.1.14)	gutB zj316_0159	Lactobacillus plantarum ZJ316	369	40,055	
R9X5K6	R9X5K6_LACPN	Alcohol dehydrogenase	Lp16_1276	Lactobacillus plantarum 16	347	36,826	
M4KHB5	M4KHB5_LACPN	Adh1 protein (EC 1.1.1.1)	adh1 zj316_1663	Lactobacillus plantarum ZJ316	255	27,849	
M4KGX7	M4KGX7_LACPN	Uncharacterized protein (EC 1.1.1.1)	zj316_1528	Lactobacillus plantarum ZJ316	343	37,543	
R9X5X2	R9X5X2_LACPN	D-arabitol-phosphate dehydrogenase	Lp16_2771	Lactobacillus plantarum 16	352	38,196	
R9X297	R9X297_LACPN	Alcohol dehydrogenase	Lp16_1272	Lactobacillus plantarum 16	316	34,246	
R9WZK9	R9WZK9_LACPN	Medium chain dehydrogenases/reductase (MDR)/zinc-dependent alcohol dehydrogenase-like family protein	Lp16_0081	Lactobacillus plantarum 16	334	36,182	
R9X3R7	R9X3R7_LACPN	Alcohol dehydrogenase	Lp16_1845	Lactobacillus plantarum 16	342	36,096	
M4KKG3	M4KKG3_LACPN	Adh2 protein (EC 1.1.1.1)	adh2 zj316_2743	Lactobacillus plantarum ZJ316	346	36,679	
R9X1D6	R9X1D6_LACPN	Alcohol dehydrogenase	Lp16_1260	Lactobacillus plantarum 16	156	17,8	
M4KHP8	M4KHP8_LACPN	Adh1 protein (EC 1.1.1.1)	adh1 zj316_1664	Lactobacillus plantarum ZJ316	80	8,776	
R9X3K4	R9X3K4_LACPN	Oxidoreductase, medium chain dehydrogenases/reductase (MDR)/zinc-dependent alcohol dehydrogenase-like family	Lp16_1512	Lactobacillus plantarum 16	314	33,545	
R9X556	R9X556_LACPN	Alcohol dehydrogenase	Lp16_1151	Lactobacillus plantarum 16	343	37,626	
A0A0R1JZE0	A0A0R1JZE0_9LACO	Aryl-alcohol dehydrogenase related enzyme	FD30_GL001385	Lactobacillus namurensis DSM 19117	337	37,681	
A0A0R1K7M4	A0A0R1K7M4_9LACO	Alcohol dehydrogenase	FD30_GL000581	Lactobacillus namurensis DSM 19117	338	36,121	
A0A0R1K151	A0A0R1K151_9LACO	Uncharacterized protein	FD30_GL000470	Lactobacillus namurensis DSM 19117	316	33,198	
F7R1R2	F7R1R2_9LACO	Aryl-alcohol dehydrogenase	LRU_01636	Lactobacillus ruminis SPM0211	371	39,929	
A0A0R1JVS6	A0A0R1JVS6_9LACO	Aryl-alcohol dehydrogenase	FD30_GL001016	Lactobacillus namurensis DSM 19117	375	38,952	
A0A0R1K7H5	A0A0R1K7H5_9LACO	Zinc-containing alcohol dehydrogenase superfamily protein	FD30_GL001461	Lactobacillus namurensis DSM 19117	317	34,677	
A0A0R1JW87	A0A0R1JW87_9LACO	Alcohol dehydrogenase	FD30_GL000619	Lactobacillus namurensis DSM 19117	338	35,915	
F7R038	F7R038_9LACO	Putative bifunctional acetaldehyde-CoA/alcohol dehydrogenase	LRU_01046	Lactobacillus ruminis SPM0211	462	49,16	
A0A0R1K0U9	A0A0R1K0U9_9LACO	Alcohol dehydrogenase	FD30_GL000471	Lactobacillus namurensis DSM 19117	347	36,497	
A0A0R1K430	A0A0R1K430_9LACO	Aryl-alcohol dehydrogenase related enzyme	FD30_GL001177	Lactobacillus namurensis DSM 19117	327	35,764	
A0A0R1JTT1	A0A0R1JTT1_9LACO	Threonine dehydrogenase related Zn-dependent dehydrogenase	FD30_GL002208	Lactobacillus namurensis DSM 19117	336	35,924	
A0A0R1JY76	A0A0R1JY76_9LACO	Zn-dependent alcohol dehydrogenase	FD30_GL001541	Lactobacillus namurensis DSM 19117	373	39,762	
F7R2H3	F7R2H3_9LACO	S-(Hydroxymethyl)glutathione dehydrogenase	LRU_01896	Lactobacillus ruminis SPM0211	346	36,894	
A0A0R1JTC6	A0A0R1JTC6_9LACO	Aryl-alcohol dehydrogenase related enzyme	FD30_GL002196	Lactobacillus namurensis DSM 19117	329	36,74	
A0A0R1JNT7	A0A0R1JNT7_9LACO	Alcohol dehydrogenase	FD30_GL001108	Lactobacillus namurensis DSM 19117	351	37,762	
A0A0R1KE91	A0A0R1KE91_9LACO	Alcohol dehydrogenase	FD30_GL000047	Lactobacillus namurensis DSM 19117	346	36,449	
A0A0D4CK95	A0A0D4CK95_9LACO	Butanediol dehydrogenase	LBLM1_04105	Lactobacillus mucosae LM1	348	37,394	
A0A0D4CIF0	A0A0D4CIF0_9LACO	Alcohol dehydrogenase	LBLM1_01140	Lactobacillus mucosae LM1	348	37,951	
A0A0D4CKB2	A0A0D4CKB2_9LACO	Aryl-alcohol dehydrogenase	LBLM1_05475	Lactobacillus mucosae LM1	365	39	
A0A0D4CHX1	A0A0D4CHX1_9LACO	Alcohol dehydrogenase	LBLM1_00090	Lactobacillus mucosae LM1	336	35,831	
A0A0D4CJ17	A0A0D4CJ17_9LACO	Alcohol dehydrogenase	LBLM1_01450	Lactobacillus mucosae LM1	340	35,889	
A0A0R2CM54	A0A0R2CM54_9LACO	Aryl-alcohol dehydrogenase related enzyme	FD21_GL001773	Lactobacillus vini DSM 20605	304	33,763	
A0A0R2CEM9	A0A0R2CEM9_9LACO	Alcohol dehydrogenase, zinc-binding protein	FD21_GL001395	Lactobacillus vini DSM 20605	342	37,397	
A0A0R2BVU4	A0A0R2BVU4_9LACO	Aryl-alcohol dehydrogenase	FD21_GL000314	Lactobacillus vini DSM 20605	371	39,773	
A0A0R2CCR6	A0A0R2CCR6_9LACO	(R,R)-butanediol dehydrogenase	FD21_GL001794	Lactobacillus vini DSM 20605	358	38,314	
A0A0R2CAW5	A0A0R2CAW5_9LACO	Aryl-alcohol dehydrogenase	FD21_GL000580	Lactobacillus vini DSM 20605	384	41,486	
A0A0R1T5F5	A0A0R1T5F5_9LACO	Short-chain alcohol dehydrogenase	FC17_GL002698	Lactobacillus paracollinoides DSM 15502 = JCM 11969	240	25,468	
K6PF55	K6PF55_LACCA	Short-chain alcohol dehydrogenase (EC 1.-.-.-)	LCA32G_1926	Lactobacillus casei 32G	237	24,331	
K6QZS1	K6QZS1_LACCA	Short-chain alcohol dehydrogenase (EC 1.-.-.-)	LCA32G_0241	Lactobacillus casei 32G	277	30,168	
K6QX25	K6QX25_LACCA	Short-chain alcohol dehydrogenase (EC 1.-.-.-)	LCA32G_1042	Lactobacillus casei 32G	286	31,792	
A0A0R1TJY5	A0A0R1TJY5_9LACO	Alcohol dehydrogenase	FC17_GL000611	Lactobacillus paracollinoides DSM 15502 = JCM 11969	354	37,403	
K6QP20	K6QP20_LACCA	Zinc-containing alcohol dehydrogenase/quinone oxidoreductase [NADPH] (EC 1.-.-.-) (EC 1.1.1.-)	LCA32G_0503	Lactobacillus casei 32G	302	31,437	
K6PZA4	K6PZA4_LACCA	Zinc-binding alcohol dehydrogenase (EC 1.-.-.-) (EC 1.1.1.-)	LCA32G_0214	Lactobacillus casei 32G	340	37,352	
K6PIR9	K6PIR9_LACCA	Zinc-containing alcohol dehydrogenase/quinone oxidoreductase [NADPH] (EC 1.-.-.-) (EC 1.1.1.-)	LCA32G_2132	Lactobacillus casei 32G	322	34,706	
A0A0R1TD13	A0A0R1TD13_9LACO	Alcohol dehydrogenase	FC17_GL000528	Lactobacillus paracollinoides DSM 15502 = JCM 11969	345	36,747	
A0A0R1T520	A0A0R1T520_9LACO	Aryl-alcohol dehydrogenase related enzyme	FC17_GL002023	Lactobacillus paracollinoides DSM 15502 = JCM 11969	281	31,124	
A0A0R1T5F1	A0A0R1T5F1_9LACO	Aryl-alcohol dehydrogenase	FC17_GL002077	Lactobacillus paracollinoides DSM 15502 = JCM 11969	307	32,196	
K6PCQ6	K6PCQ6_LACCA	Alcohol dehydrogenase (EC 1.-.-.-) (EC 1.1.1.1)	LCA32G_2714	Lactobacillus casei 32G	116	12,46	
K6PWT1	K6PWT1_LACCA	Alcohol dehydrogenase (EC 1.-.-.-) (EC 1.1.1.1)	LCA32G_1205	Lactobacillus casei 32G	350	38,249	
K6P8Z7	K6P8Z7_LACCA	Alcohol dehydrogenase GroES domain protein (EC 1.-.-.-)	LCA32G_1223	Lactobacillus casei 32G	347	38,352	
A0A0R1T2S0	A0A0R1T2S0_9LACO	Alcohol dehydrogenase GroES domain-containing protein	FC17_GL002391	Lactobacillus paracollinoides DSM 15502 = JCM 11969	320	34,179	
A0A0R1T4Z3	A0A0R1T4Z3_9LACO	Ethanol-active dehydrogenase acetaldehyde-active reductase	FC17_GL001888	Lactobacillus paracollinoides DSM 15502 = JCM 11969	340	36,401	
K6QJH4	K6QJH4_LACCA	Aryl-alcohol dehydrogenase-related enzyme	LCA32G_0389	Lactobacillus casei 32G	334	37,02	
K6QL28	K6QL28_LACCA	Alcohol dehydrogenase (EC 1.-.-.-) (EC 1.1.1.1)	LCA32G_2715	Lactobacillus casei 32G	228	24,599	
A0A0R1T3D6	A0A0R1T3D6_9LACO	Alcohol dehydrogenase	FC17_GL002401	Lactobacillus paracollinoides DSM 15502 = JCM 11969	318	34,499	
K6PXB0	K6PXB0_LACCA	Aryl-alcohol dehydrogenase-related enzyme	LCA32G_1305	Lactobacillus casei 32G	309	34,088	
A0A0R1TIK9	A0A0R1TIK9_9LACO	Alcohol dehydrogenase GroES domain-containing protein	FC17_GL003149	Lactobacillus paracollinoides DSM 15502 = JCM 11969	134	14,37	
A0A0R1T5D6	A0A0R1T5D6_9LACO	Aryl-alcohol dehydrogenase related enzyme	FC17_GL002065	Lactobacillus paracollinoides DSM 15502 = JCM 11969	334	36,954	
A0A0R1TF82	A0A0R1TF82_9LACO	Benzyl alcohol dehydrogenase AreB	FC17_GL000062	Lactobacillus paracollinoides DSM 15502 = JCM 11969	103	11,092	
A0A0R1TP12	A0A0R1TP12_9LACO	Uncharacterized protein	FC17_GL000016	Lactobacillus paracollinoides DSM 15502 = JCM 11969	318	33,394	
A0A0R1TQ28	A0A0R1TQ28_9LACO	Alcohol dehydrogenase GroES domain-containing protein	FC17_GL003150	Lactobacillus paracollinoides DSM 15502 = JCM 11969	176	19,069	
A0A0R1TCQ5	A0A0R1TCQ5_9LACO	Iron-containing alcohol dehydrogenase	FC17_GL000669	Lactobacillus paracollinoides DSM 15502 = JCM 11969	397	43,341	
K6PVE5	K6PVE5_LACCA	Zinc-containing alcohol dehydrogenase/quinone oxidoreductase [NADPH] (EC 1.-.-.-) (EC 1.1.1.-)	LCA32G_1051	Lactobacillus casei 32G	206	21,857	
A0A0R1T1T1	A0A0R1T1T1_9LACO	Zinc-binding alcohol dehydrogenase family protein	FC17_GL002896	Lactobacillus paracollinoides DSM 15502 = JCM 11969	348	37,7	
K6QX16	K6QX16_LACCA	Alcohol dehydrogenase (EC 1.-.-.-) (EC 1.1.1.1)	LCA32G_1032	Lactobacillus casei 32G	319	33,409	
K6Q7R3	K6Q7R3_LACCA	Zinc-containing alcohol dehydrogenase/quinone oxidoreductase [NADPH] (EC 1.-.-.-) (EC 1.1.1.-)	LCA32G_1272	Lactobacillus casei 32G	292	31,425	
A0A0R1TGK7	A0A0R1TGK7_9LACO	Aryl-alcohol dehydrogenase related enzyme	FC17_GL003210	Lactobacillus paracollinoides DSM 15502 = JCM 11969	326	35,567	
K6Q7H0	K6Q7H0_LACCA	Zn-dependent dehydrogenase (EC 1.-.-.-)	LCA32G_1306	Lactobacillus casei 32G	360	38,594	
K6QMD6	K6QMD6_LACCA	Zinc-containing alcohol dehydrogenase/quinone oxidoreductase [NADPH] (EC 1.1.1.-)	LCA32G_1050	Lactobacillus casei 32G	134	14,364	
A0A0R1TD62	A0A0R1TD62_9LACO	Threonine dehydrogenase related Zn-dependent dehydrogenase	FC17_GL000577	Lactobacillus paracollinoides DSM 15502 = JCM 11969	347	36,722	
A0A0R1TFN5	A0A0R1TFN5_9LACO	Benzyl alcohol dehydrogenase AreB	FC17_GL000061	Lactobacillus paracollinoides DSM 15502 = JCM 11969	268	28,449	
A0A0R1T241	A0A0R1T241_9LACO	Benzyl alcohol dehydrogenase	FC17_GL002388	Lactobacillus paracollinoides DSM 15502 = JCM 11969	366	38,367	
A0A0R1TPD5	A0A0R1TPD5_9LACO	Alcohol dehydrogenase	FC17_GL000621	Lactobacillus paracollinoides DSM 15502 = JCM 11969	341	35,952	
K6P9A7	K6P9A7_LACCA	Zinc-containing alcohol dehydrogenase/quinone oxidoreductase [NADPH] (EC 1.1.1.-)	LCA32G_1273	Lactobacillus casei 32G	63	6,936	
A0A0R1JBV4	A0A0R1JBV4_LACBU	Aryl-alcohol dehydrogenase	FC79_GL000441	Lactobacillus buchneri DSM 20057	364	38,445	
A0A0R1N9K8	A0A0R1N9K8_9LACO	Alcohol dehydrogenase	FD09_GL001758	Lactobacillus perolens DSM 12744	334	35,109	
A0A0F4L994	A0A0F4L994_9LACO	Short-chain alcohol dehydrogenase	JF76_18550	Lactobacillus kullabergensis	295	31,546	
A0A0R1MZ24	A0A0R1MZ24_9LACO	Zn-dependent alcohol dehydrogenase	FD09_GL002764	Lactobacillus perolens DSM 12744	373	39,935	
A0A0R1MSD4	A0A0R1MSD4_9LACO	L-iditol 2-dehydrogenase	FD09_GL000771	Lactobacillus perolens DSM 12744	372	40,605	
A0A0R1MZ10	A0A0R1MZ10_9LACO	Alcohol dehydrogenase	FD09_GL002154	Lactobacillus perolens DSM 12744	357	38,052	
A0A0R1N339	A0A0R1N339_9LACO	Short-chain alcohol dehydrogenase	FD09_GL002759	Lactobacillus perolens DSM 12744	274	28,817	
A0A0R1JMD7	A0A0R1JMD7_LACBU	Alcohol dehydrogenase zinc-binding domain-containing protein	FC79_GL000259	Lactobacillus buchneri DSM 20057	304	32,469	
A0A0R1J7I3	A0A0R1J7I3_LACBU	Aryl-alcohol dehydrogenase	FC79_GL001631	Lactobacillus buchneri DSM 20057	373	39,893	
A0A0R1JKJ8	A0A0R1JKJ8_LACBU	Aryl-alcohol dehydrogenase	FC79_GL000755	Lactobacillus buchneri DSM 20057	377	40,3	
A0A0R1JIA3	A0A0R1JIA3_LACBU	Alcohol dehydrogenase GroES domain-containing protein	FC79_GL001466	Lactobacillus buchneri DSM 20057	197	21,317	
E4SI86	E4SI86_LACAR	Aryl-alcohol dehydrogenase	LA2_04575	Lactobacillus amylovorus (strain GRL 1112)	284	31,028	
A0A0R1JAJ7	A0A0R1JAJ7_LACBU	Alcohol dehydrogenase zinc-binding domain-containing protein	FC79_GL000885	Lactobacillus buchneri DSM 20057	328	35,651	
A0A0R2MJB4	A0A0R2MJB4_9LACO	Aldehyde-alcohol dehydrogenase	IV64_GL001945	Lactobacillus xiangfangensis	868	94,876	
A0A0R1JPU9	A0A0R1JPU9_LACBU	L-iditol 2-dehydrogenase	FC79_GL000833	Lactobacillus buchneri DSM 20057	356	38,575	
A0A0R1JCF3	A0A0R1JCF3_LACBU	Alcohol dehydrogenase	FC79_GL002291	Lactobacillus buchneri DSM 20057	347	36,831	
A0A0R1JIX7	A0A0R1JIX7_LACBU	Alcohol dehydrogenase zinc-binding domain-containing protein	FC79_GL000538	Lactobacillus buchneri DSM 20057	307	32,483	
A0A0R1JJF3	A0A0R1JJF3_LACBU	Alcohol dehydrogenase GroES domain-containing protein	FC79_GL001428	Lactobacillus buchneri DSM 20057	338	36,186	
E4SIZ9	E4SIZ9_LACAR	Aryl-alcohol dehydrogenase related enzyme	LA2_05945	Lactobacillus amylovorus (strain GRL 1112)	73	8,05	
A0A0R1JDP6	A0A0R1JDP6_LACBU	Zinc-binding alcohol dehydrogenase family protein	FC79_GL001909	Lactobacillus buchneri DSM 20057	358	39,01	
A0A0R1JCX8	A0A0R1JCX8_LACBU	L-threonine 3-dehydrogenase	FC79_GL002010	Lactobacillus buchneri DSM 20057	322	34,695	
A0A0R2MA39	A0A0R2MA39_9LACO	Threonine dehydrogenase related Zn-dependent dehydrogenase	IV64_GL000664	Lactobacillus xiangfangensis	346	36,897	
A0A0R2M6Z3	A0A0R2M6Z3_9LACO	Alcohol dehydrogenase	IV64_GL001208	Lactobacillus xiangfangensis	356	37,907	
A0A0R1PJG0	A0A0R1PJG0_9LACO	Short-chain alcohol dehydrogenase	FD33_GL000368	Lactobacillus paralimentarius DSM 13238 = JCM 10415	240	26,196	
A0A0R2MBN9	A0A0R2MBN9_9LACO	Aryl-alcohol dehydrogenase family enzyme	IV64_GL002545	Lactobacillus xiangfangensis	330	36,799	
A0A062XDI8	A0A062XDI8_9LACO	ABC transporter, ATP-binding subunit, PQQ-dependent alcohol dehydrogenase system	Lani381_0248	Lactobacillus animalis	177	19,954	
A0A0R1PHC5	A0A0R1PHC5_9LACO	Short-chain alcohol dehydrogenase	FD33_GL000850	Lactobacillus paralimentarius DSM 13238 = JCM 10415	264	29,549	
C2D1E0	C2D1E0_LACBR	Alcohol dehydrogenase, iron-dependent (EC 1.1.1.1)	dhaT HMPREF0496_1362	Lactobacillus brevis subsp. gravesensis ATCC 27305	389	42,371	
C2CXT1	C2CXT1_LACBR	Putative chlorophyll synthesis pathway protein BchC (EC 1.1.1.103)	tdh HMPREF0496_0103	Lactobacillus brevis subsp. gravesensis ATCC 27305	333	35,925	
C2CXK2	C2CXK2_LACBR	Alcohol dehydrogenase, iron-dependent (EC 1.1.1.1)	gldA HMPREF0496_0024	Lactobacillus brevis subsp. gravesensis ATCC 27305	372	40,23	
C2D0M9	C2D0M9_LACBR	Alcohol dehydrogenase, iron-dependent (EC 1.1.1.1)	HMPREF0496_1101	Lactobacillus brevis subsp. gravesensis ATCC 27305	386	42,073	
R9WJA2	R9WJA2_LACRE	Alcohol dehydrogenase, propanol-preferring	LRI_2020	Lactobacillus reuteri I5007	340	36,068	
C2CXN2	C2CXN2_LACBR	L-iditol 2-dehydrogenase (EC 1.1.1.14)	gutB HMPREF0496_0054	Lactobacillus brevis subsp. gravesensis ATCC 27305	370	40,927	
M2Q0D3	M2Q0D3_9FIRM	Aldehyde-alcohol dehydrogenase	HMPREF9943_01311	Eggerthia catenaformis OT 569 = DSM 20559	912	100,183	
R9WG03	R9WG03_LACRE	Alcohol dehydrogenase (EC 1.1.1.1)	LRI_0429	Lactobacillus reuteri I5007	348	37,878	
C2D557	C2D557_LACBR	GroES-like protein (EC 1.1.1.1)	adhA HMPREF0496_2679	Lactobacillus brevis subsp. gravesensis ATCC 27305	338	36,172	
A0A0R1PAN6	A0A0R1PAN6_9LACO	Alcohol dehydrogenase	FD33_GL000948	Lactobacillus paralimentarius DSM 13238 = JCM 10415	346	36,836	
A0A0R1PR82	A0A0R1PR82_9LACO	Alcohol dehydrogenase	FD33_GL001953	Lactobacillus paralimentarius DSM 13238 = JCM 10415	347	36,988	
C2D3V7	C2D3V7_LACBR	GroES-like protein (EC 1.1.1.90)	xylB-2 HMPREF0496_2229	Lactobacillus brevis subsp. gravesensis ATCC 27305	373	39,984	
C2D2N5	C2D2N5_LACBR	GroES-like protein (EC 1.1.1.4)	bdh1 HMPREF0496_1807	Lactobacillus brevis subsp. gravesensis ATCC 27305	356	38,42	
C2D2Y3	C2D2Y3_LACBR	GroES-like protein (EC 1.1.1.90)	xylB-1 HMPREF0496_1905	Lactobacillus brevis subsp. gravesensis ATCC 27305	377	40,43	
C2CXQ5	C2CXQ5_LACBR	Zinc-binding alcohol dehydrogenase family protein	HMPREF0496_0077	Lactobacillus brevis subsp. gravesensis ATCC 27305	340	37,569	
C2D300	C2D300_LACBR	Alcohol dehydrogenase, iron-dependent (EC 1.1.1.1)	HMPREF0496_1922	Lactobacillus brevis subsp. gravesensis ATCC 27305	384	42,747	
A0A0R1PMT0	A0A0R1PMT0_9LACO	Alcohol dehydrogenase zinc-binding domain-containing protein	FD33_GL002218	Lactobacillus paralimentarius DSM 13238 = JCM 10415	317	33,449	
C2D0H5	C2D0H5_LACBR	GroES-like protein	HMPREF0496_1047	Lactobacillus brevis subsp. gravesensis ATCC 27305	346	36,701	
R9WE55	R9WE55_LACRE	L-threonine 3-dehydrogenase	LRI_0175	Lactobacillus reuteri I5007	336	35,976	
A0A0R1PBY7	A0A0R1PBY7_9LACO	Aldehyde-alcohol dehydrogenase 2	FD33_GL000436	Lactobacillus paralimentarius DSM 13238 = JCM 10415	511	54,517	
R9WI91	R9WI91_LACRE	Alcohol dehydrogenase (EC 1.1.1.1)	LRI_0478	Lactobacillus reuteri I5007	342	36,158	
A0A062XAB1	A0A062XAB1_9LACO	Zinc-binding alcohol dehydrogenase family protein	Lani381_1363	Lactobacillus animalis	119	12,693	
A0A0R1PGE0	A0A0R1PGE0_9LACO	Alcohol dehydrogenase, zinc-binding protein	FD33_GL001957	Lactobacillus paralimentarius DSM 13238 = JCM 10415	340	38,095	
C2D5H9	C2D5H9_LACBR	Zinc-binding alcohol dehydrogenase family protein (EC 1.-.-.-)	adh HMPREF0496_2801	Lactobacillus brevis subsp. gravesensis ATCC 27305	362	39,174	
A0A062XAT3	A0A062XAT3_9LACO	S-(Hydroxymethyl)mycothiol dehydrogenase	Lani381_0519	Lactobacillus animalis	345	36,642	
A0A0R1PIX6	A0A0R1PIX6_9LACO	Aryl-alcohol dehydrogenase	FD33_GL001097	Lactobacillus paralimentarius DSM 13238 = JCM 10415	373	40,035	
A0A0R1UR16	A0A0R1UR16_9LACO	Short-chain alcohol dehydrogenase	FD28_GL001238	Lactobacillus hammesii DSM 16381	252	26,695	
A0A0R1UIR1	A0A0R1UIR1_9LACO	Threonine dehydrogenase related Zn-dependent dehydrogenase	FD28_GL001158	Lactobacillus hammesii DSM 16381	346	36,833	
A0A0R1UK54	A0A0R1UK54_9LACO	Threonine dehydrogenase related Zn-dependent dehydrogenase	FD28_GL000898	Lactobacillus hammesii DSM 16381	334	35,848	
A0A0R1K1V5	A0A0R1K1V5_9LACO	Alcohol dehydrogenase GroES domain-containing protein	FD02_GL000715	Lactobacillus nasuensis JCM 17158	317	33,083	
C8P668	C8P668_9LACO	GroES-like protein (EC 1.1.1.1)	adhP HMPREF0494_0812	Lactobacillus antri DSM 16041	340	36,047	
C8P6N8	C8P6N8_9LACO	Aldehyde dehydrogenase (NAD) family protein (EC 1.2.1.-)	aad HMPREF0494_0982	Lactobacillus antri DSM 16041	878	96,818	
C8P517	C8P517_9LACO	GroES-like protein (EC 1.1.1.90)	adhC HMPREF0494_0411	Lactobacillus antri DSM 16041	373	40,015	
A0A0R1V080	A0A0R1V080_9LACO	Short-chain alcohol dehydrogenase	FD28_GL001800	Lactobacillus hammesii DSM 16381	239	24,921	
A0A0R1K0Q5	A0A0R1K0Q5_9LACO	Alcohol dehydrogenase, iron-containing	FD02_GL001371	Lactobacillus nasuensis JCM 17158	379	41,49	
C8P4Z2	C8P4Z2_9LACO	Alcohol dehydrogenase, iron-dependent (EC 1.1.1.1)	dhaT HMPREF0494_0386	Lactobacillus antri DSM 16041	390	42,159	
A0A0R1V441	A0A0R1V441_9LACO	Aryl-alcohol dehydrogenase	FD28_GL001675	Lactobacillus hammesii DSM 16381	369	38,72	
A0A0R1UVM0	A0A0R1UVM0_9LACO	Alcohol dehydrogenase GroES domain protein	FD28_GL000638	Lactobacillus hammesii DSM 16381	340	36,834	
A0A0R1URD0	A0A0R1URD0_9LACO	Alcohol dehydrogenase	FD28_GL001395	Lactobacillus hammesii DSM 16381	352	37,324	
A0A0R1USQ9	A0A0R1USQ9_9LACO	Alcohol dehydrogenase	FD28_GL001959	Lactobacillus hammesii DSM 16381	348	38,277	
A0A0R1UIG4	A0A0R1UIG4_9LACO	Alcohol dehydrogenase	FD28_GL001585	Lactobacillus hammesii DSM 16381	338	36,096	
A0A0R1USA0	A0A0R1USA0_9LACO	Short-chain alcohol dehydrogenase	FD28_GL001019	Lactobacillus hammesii DSM 16381	264	28,14	
C8P5Z6	C8P5Z6_9LACO	Zinc-binding alcohol dehydrogenase family protein (EC 1.-.-.-)	adhA HMPREF0494_0740	Lactobacillus antri DSM 16041	348	37,618	
C8P9V7	C8P9V7_9LACO	NADP-dependent alcohol dehydrogenase (EC 1.1.1.2)	aDH HMPREF0494_2101	Lactobacillus antri DSM 16041	356	38,021	
A0A0R1JU59	A0A0R1JU59_9LACO	Alcohol dehydrogenase	FD02_GL000307	Lactobacillus nasuensis JCM 17158	347	37,008	
A0A0R1UUP1	A0A0R1UUP1_9LACO	Aryl-alcohol dehydrogenase related enzyme	FD28_GL000315	Lactobacillus hammesii DSM 16381	332	37,619	
C8P426	C8P426_9LACO	Zinc-binding alcohol dehydrogenase family protein (EC 1.1.1.1)	qor2 HMPREF0494_0070	Lactobacillus antri DSM 16041	340	37,773	
A0A0R1N9J1	A0A0R1N9J1_9LACO	Nadph dependent r-specific alcohol dehydrogenase	FD12_GL002625	Lactobacillus rapi DSM 19907 = JCM 15042	252	26,965	
C8P5W2	C8P5W2_9LACO	GroES-like protein (EC 1.1.1.1)	adh HMPREF0494_0706	Lactobacillus antri DSM 16041	346	36,642	
A0A0R1UQV1	A0A0R1UQV1_9LACO	Zn-dependent alcohol dehydrogenase	FD28_GL000971	Lactobacillus hammesii DSM 16381	378	40,045	
A0A0R1JI48	A0A0R1JI48_9LACO	Alcohol dehydrogenase	FD02_GL000162	Lactobacillus nasuensis JCM 17158	330	34,107	
C8P9D0	C8P9D0_9LACO	Zinc-binding alcohol dehydrogenase family protein (EC 1.1.1.1)	qor HMPREF0494_1924	Lactobacillus antri DSM 16041	339	37,372	
A0A0R1URY7	A0A0R1URY7_9LACO	Threonine dehydrogenase related Zn-dependent dehydrogenase	FD28_GL000902	Lactobacillus hammesii DSM 16381	333	35,606	
A0A0R1V3F8	A0A0R1V3F8_9LACO	Aryl-alcohol dehydrogenase related enzyme	FD28_GL000113	Lactobacillus hammesii DSM 16381	328	35,974	
A0A0R1JTI3	A0A0R1JTI3_9LACO	Iron-containing alcohol dehydrogenase	FD02_GL001001	Lactobacillus nasuensis JCM 17158	391	41,72	
A0A0R1NKF4	A0A0R1NKF4_9LACO	Alcohol dehydrogenase zinc-binding domain-containing protein	FD12_GL001286	Lactobacillus rapi DSM 19907 = JCM 15042	303	32,106	
F3MQT7	F3MQT7_LACHE	Bifunctional acetaldehyde-CoA/alcohol dehydrogenase	AAULH_02698	Lactobacillus helveticus MTCC 5463	475	52,469	
F3MQS9	F3MQS9_LACHE	Bifunctional acetaldehyde-CoA/alcohol dehydrogenase (Fragment)	AAULH_02693	Lactobacillus helveticus MTCC 5463	397	43,517	
F3MQI2	F3MQI2_LACHE	Putative iron-containing alcohol dehydrogenase (Fragment)	AAULH_14151	Lactobacillus helveticus MTCC 5463	75	8,221	
A0A0R1NPH4	A0A0R1NPH4_9LACO	Zinc-binding alcohol dehydrogenase family protein	FD12_GL000039	Lactobacillus rapi DSM 19907 = JCM 15042	342	37,785	
A0A0R1N6J5	A0A0R1N6J5_9LACO	Alcohol dehydrogenase, propanol-preferring	FD12_GL000253	Lactobacillus rapi DSM 19907 = JCM 15042	338	36,196	
A0A0R1N7Y0	A0A0R1N7Y0_9LACO	Benzyl alcohol dehydrogenase AreB	FD12_GL000667	Lactobacillus rapi DSM 19907 = JCM 15042	388	41,56	
A0A0R1NFJ7	A0A0R1NFJ7_9LACO	Zinc-binding alcohol dehydrogenase family protein	FD12_GL002221	Lactobacillus rapi DSM 19907 = JCM 15042	355	38,624	
A0A0R1NDU1	A0A0R1NDU1_9LACO	Chlorophyll synthesis pathway protein BchC	FD12_GL000024	Lactobacillus rapi DSM 19907 = JCM 15042	334	36,113	
A0A0R1NIQ6	A0A0R1NIQ6_9LACO	GroES-like protein	FD12_GL001851	Lactobacillus rapi DSM 19907 = JCM 15042	393	42,076	
M5AB48	M5AB48_LACBR	Short-Chain Alcohol Dehydrogenase	LVISKB_0383	Lactobacillus brevis KB290	74	8,086	
M5AHN2	M5AHN2_LACBR	L-threonine 3-dehydrogenase	LVISKB_2222	Lactobacillus brevis KB290	333	35,695	
M5AEM7	M5AEM7_LACBR	Zinc-type alcohol dehydrogenase-like protein SAV2186	LVISKB_1235	Lactobacillus brevis KB290	357	39,319	
M5AXE3	M5AXE3_LACBR	Zinc-type alcohol dehydrogenase-like protein SERP1785	LVISKB_0071	Lactobacillus brevis KB290	335	36,059	
M5AGS0	M5AGS0_LACBR	Zinc-type alcohol dehydrogenase-like protein SERP1785	LVISKB_1897	Lactobacillus brevis KB290	337	36,688	
M5AD48	M5AD48_LACBR	Alcohol dehydrogenase	LVISKB_1108	Lactobacillus brevis KB290	374	39,945	
M5AEF4	M5AEF4_LACBR	Uncharacterized zinc-type alcohol dehydrogenase-like protein YogA	LVISKB_1102	Lactobacillus brevis KB290	322	34,793	
M5ABW9	M5ABW9_LACBR	Alcohol dehydrogenase 1	LVISKB_0260	Lactobacillus brevis KB290	343	36,432	
M5AZK9	M5AZK9_LACBR	Alcohol dehydrogenase 1	LVISKB_0951	Lactobacillus brevis KB290	338	36,035	
M5AE62	M5AE62_LACBR	Aryl-alcohol dehydrogenase	LVISKB_1060	Lactobacillus brevis KB290	366	39,076	
D9PTK7	D9PTK7_FINMA	Alcohol dehydrogenase, iron-dependent (EC 1.1.1.1)	adh HMPREF9261_0252	Finegoldia magna ACS-171-V-Col3	386	42,358	
C7XLY1	C7XLY1_9LACO	Aldehyde-alcohol dehydrogenase 2 (EC 1.1.1.1) (EC 1.2.1.10)	adh HMPREF5045_02042	Lactobacillus crispatus 125-2-CHN	694	76,351	
A0A0R2DD02	A0A0R2DD02_9LACO	Uncharacterized protein	FD18_GL000972	Lactobacillus taiwanensis DSM 21401	346	37,363	
D9PQ69	D9PQ69_FINMA	GroES-like protein	HMPREF9261_1771	Finegoldia magna ACS-171-V-Col3	351	37,434	
A0A0R2DGM6	A0A0R2DGM6_9LACO	Alcohol dehydrogenase, zinc-binding	FD18_GL000590	Lactobacillus taiwanensis DSM 21401	341	38,245	
D9PPP2	D9PPP2_FINMA	Alcohol dehydrogenase, iron-dependent (EC 1.1.1.1)	HMPREF9261_1164	Finegoldia magna ACS-171-V-Col3	383	43,268	
N1ZPQ4	N1ZPQ4_9LACO	Alcohol dehydrogenase	C821_01826	Lactobacillus sp. ASF360	346	37,06	
N2AJS2	N2AJS2_9LACO	Aldehyde-alcohol dehydrogenase	C821_00346	Lactobacillus sp. ASF360	874	96,454	
A0A0D6A4J4	A0A0D6A4J4_9LACO	Aldehyde-alcohol dehydrogenase	LBAT_1353	Lactobacillus acetotolerans	874	96,004	
N1ZX33	N1ZX33_9LACO	Aryl-alcohol dehydrogenase (Fragment)	C821_00856	Lactobacillus sp. ASF360	197	21,034	
N2ABC1	N2ABC1_9LACO	Aryl-alcohol dehydrogenase (Fragment)	C821_00855	Lactobacillus sp. ASF360	141	15,613	
A0A0D6A572	A0A0D6A572_9LACO	Aryl-alcohol dehydrogenase	LBAT_1588	Lactobacillus acetotolerans	360	38,684	
A0A0D6A251	A0A0D6A251_9LACO	Alcohol dehydrogenase	LBAT_0514	Lactobacillus acetotolerans	340	37,938	
A0A0D6A359	A0A0D6A359_9LACO	Alcohol dehydrogenase	LBAT_0745	Lactobacillus acetotolerans	305	33,705	
N1ZWX3	N1ZWX3_9LACO	Zinc-binding alcohol dehydrogenase	C821_01507	Lactobacillus sp. ASF360	339	38,227	
A0A0R1RX86	A0A0R1RX86_9LACO	Uncharacterized protein	FC69_GL000598	Lactobacillus fuchuensis DSM 14340 = JCM 11249	371	39,629	
A0A0F4KUU0	A0A0F4KUU0_9LACO	Short-chain alcohol dehydrogenase	JG29_07870	Lactobacillus mellis	296	31,896	
A0A0R1RRW0	A0A0R1RRW0_9LACO	AdhA protein	FC69_GL001446	Lactobacillus fuchuensis DSM 14340 = JCM 11249	338	35,486	
A0A0R1RXL9	A0A0R1RXL9_9LACO	Alcohol dehydrogenase	FC69_GL000003	Lactobacillus fuchuensis DSM 14340 = JCM 11249	350	37,353	
A0A0R1RZ03	A0A0R1RZ03_9LACO	Zinc-containing alcohol dehydrogenase(Oxidoreductase)	FC69_GL000204	Lactobacillus fuchuensis DSM 14340 = JCM 11249	327	35,438	
E7FNA8	E7FNA8_9LACO	GroES-like protein (EC 1.1.1.1)	adhB HMPREF0542_10385	Lactobacillus ruminis ATCC 25644	359	38,437	
A0A0F4KQ47	A0A0F4KQ47_9LACO	GroES-like protein	JG29_09090	Lactobacillus mellis	346	37,054	
A0A0F4KP66	A0A0F4KP66_9LACO	Putative (R,R)-butanediol dehydrogenase	bdh1 JG29_15080	Lactobacillus mellis	352	37,638	
A0A0F4KXB1	A0A0F4KXB1_9LACO	Aryl-alcohol dehydrogenase	xylB-1 JG29_00780	Lactobacillus mellis	377	40,272	
A0A0F4KSE0	A0A0F4KSE0_9LACO	L-iditol 2-dehydrogenase	gutB JG29_07740	Lactobacillus mellis	361	39,86	
A0A0R1T509	A0A0R1T509_9LACO	Aryl-alcohol dehydrogenase	FC36_GL001831	Lactobacillus equi DSM 15833 = JCM 10991	373	39,935	
E7FMG7	E7FMG7_9LACO	Alcohol dehydrogenase, iron-dependent (EC 1.1.1.1)	HMPREF0542_10094	Lactobacillus ruminis ATCC 25644	384	42,299	
A0A0F4KPJ3	A0A0F4KPJ3_9LACO	Aryl-alcohol dehydrogenase	adhC JG29_14000	Lactobacillus mellis	373	40,225	
A0A0R1TKR2	A0A0R1TKR2_9LACO	Alcohol dehydrogenase	FC36_GL001426	Lactobacillus equi DSM 15833 = JCM 10991	346	37,129	
A0A0F4KUI1	A0A0F4KUI1_9LACO	Alcohol dehydrogenase GroES domain protein	JG29_07000	Lactobacillus mellis	317	33,544	
A0A0F4KNU9	A0A0F4KNU9_9LACO	Uncharacterized protein	JG29_14120	Lactobacillus mellis	338	36,458	
E7FS53	E7FS53_9LACO	GroES-like protein (EC 1.1.1.90)	adhC HMPREF0542_11730	Lactobacillus ruminis ATCC 25644	371	39,929	
A0A0F4KPR4	A0A0F4KPR4_9LACO	Iron-containing alcohol dehydrogenase	JG29_14710	Lactobacillus mellis	381	41,594	
A0A0R1S7C7	A0A0R1S7C7_9LACO	L-iditol 2-dehydrogenase	FC85_GL000822	Lactobacillus diolivorans DSM 14421	369	40,735	
A0A0R1LK21	A0A0R1LK21_9LACO	Short-chain alcohol dehydrogenase	FD25_GL002731	Lactobacillus acidifarinae DSM 19394	239	24,824	
A0A0R1LMC3	A0A0R1LMC3_9LACO	Short-chain alcohol dehydrogenase	FD25_GL001775	Lactobacillus acidifarinae DSM 19394	257	27,353	
A0A0R1SHC1	A0A0R1SHC1_9LACO	L-threonine 3-dehydrogenase	FC85_GL000327	Lactobacillus diolivorans DSM 14421	333	35,819	
A0A0R1SQV6	A0A0R1SQV6_9LACO	Short-chain alcohol dehydrogenase	FC85_GL002447	Lactobacillus diolivorans DSM 14421	296	31,674	
A0A0R1LJF9	A0A0R1LJF9_9LACO	Short-chain alcohol dehydrogenase	FD25_GL002499	Lactobacillus acidifarinae DSM 19394	264	28,95	
A0A0R1SIB4	A0A0R1SIB4_9LACO	Chlorophyll synthesis pathway protein BchC	FC85_GL002763	Lactobacillus diolivorans DSM 14421	334	36,086	
A0A0R2GXS0	A0A0R2GXS0_9LACO	L-threonine 3-dehydrogenase	IV41_GL000046	Lactobacillus ingluviei	336	35,652	
A0A0R1SDD7	A0A0R1SDD7_9LACO	Alcohol dehydrogenase	FC85_GL000976	Lactobacillus diolivorans DSM 14421	361	39,12	
A0A0R1S8X3	A0A0R1S8X3_9LACO	Zinc-binding alcohol dehydrogenase	FC85_GL000676	Lactobacillus diolivorans DSM 14421	337	35,59	
A0A0R1SIE3	A0A0R1SIE3_9LACO	Zinc-binding alcohol dehydrogenase family protein	FC85_GL002796	Lactobacillus diolivorans DSM 14421	343	37,702	
A0A0R1SBU2	A0A0R1SBU2_9LACO	Zinc-containing alcohol dehydrogenase (ADH)	FC85_GL002888	Lactobacillus diolivorans DSM 14421	337	36,226	
A0A0R2GSN6	A0A0R2GSN6_9LACO	Threonine dehydrogenase	IV41_GL001173	Lactobacillus ingluviei	348	37,186	
A0A0R1K3I3	A0A0R1K3I3_9LACO	Short-chain alcohol dehydrogenase	FC67_GL001816	Lactobacillus alimentarius DSM 20249	247	26,589	
A0A0R1LHY0	A0A0R1LHY0_9LACO	Short-chain alcohol dehydrogenase	FD25_GL001493	Lactobacillus acidifarinae DSM 19394	252	26,602	
A0A0R2GT71	A0A0R2GT71_9LACO	Iron-containing alcohol dehydrogenase	IV41_GL000843	Lactobacillus ingluviei	400	43,128	
A0A0R2H4Q6	A0A0R2H4Q6_9LACO	Alcohol dehydrogenase	IV41_GL000343	Lactobacillus ingluviei	353	37,372	
A0A0R1SH81	A0A0R1SH81_9LACO	Alcohol dehydrogenase GroES domain protein	FC85_GL000074	Lactobacillus diolivorans DSM 14421	333	36,502	
A0A0R1K2V8	A0A0R1K2V8_9LACO	Short-chain alcohol dehydrogenase	FC67_GL000103	Lactobacillus alimentarius DSM 20249	234	25,526	
A0A0R1SIN8	A0A0R1SIN8_9LACO	Iron-containing alcohol dehydrogenase	FC85_GL002348	Lactobacillus diolivorans DSM 14421	379	41,142	
A0A0R1SAV3	A0A0R1SAV3_9LACO	Aryl-alcohol dehydrogenase	FC85_GL001653	Lactobacillus diolivorans DSM 14421	373	39,831	
A0A0R1SIY0	A0A0R1SIY0_9LACO	Aldehyde-alcohol dehydrogenase 2	FC85_GL002341	Lactobacillus diolivorans DSM 14421	490	51,923	
A0A0R1SII3	A0A0R1SII3_9LACO	GroES-like protein	FC85_GL002300	Lactobacillus diolivorans DSM 14421	347	36,875	
A0A0R1UGZ4	A0A0R1UGZ4_9LACO	Alcohol dehydrogenase	FC46_GL001463	Lactobacillus kalixensis DSM 16043	346	37,195	
A0A0R1SDL7	A0A0R1SDL7_9LACO	Alcohol dehydrogenase	FC85_GL000239	Lactobacillus diolivorans DSM 14421	346	36,964	
A0A0R1SFE2	A0A0R1SFE2_9LACO	Alcohol dehydrogenase	FC85_GL001109	Lactobacillus diolivorans DSM 14421	338	36,051	
A0A0R2H2K6	A0A0R2H2K6_9LACO	Alcohol dehydrogenase	IV41_GL002023	Lactobacillus ingluviei	341	35,895	
A0A0R1LI71	A0A0R1LI71_9LACO	Alcohol dehydrogenase	FD25_GL000043	Lactobacillus acidifarinae DSM 19394	351	37,843	
A0A0R2H6M0	A0A0R2H6M0_9LACO	Alcohol dehydrogenase	IV41_GL000001	Lactobacillus ingluviei	340	36,035	
A0A0R2GUJ3	A0A0R2GUJ3_9LACO	Aldehyde-alcohol dehydrogenase	IV41_GL000355	Lactobacillus ingluviei	871	94,483	
A0A0R1JVE7	A0A0R1JVE7_9LACO	Alcohol dehydrogenase	FC67_GL001508	Lactobacillus alimentarius DSM 20249	347	37,013	
A0A0R1LLC1	A0A0R1LLC1_9LACO	Alcohol dehydrogenase	FD25_GL000265	Lactobacillus acidifarinae DSM 19394	338	35,979	
A0A0R1LJ34	A0A0R1LJ34_9LACO	Threonine dehydrogenase related Zn-dependent dehydrogenase	FD25_GL002263	Lactobacillus acidifarinae DSM 19394	352	37,751	
A0A0R1LFH9	A0A0R1LFH9_9LACO	Alcohol dehydrogenase	FD25_GL000573	Lactobacillus acidifarinae DSM 19394	347	36,634	
A0A0R1JW30	A0A0R1JW30_9LACO	Aryl-alcohol dehydrogenase	FC67_GL001742	Lactobacillus alimentarius DSM 20249	373	39,723	
A0A0R1LHM7	A0A0R1LHM7_9LACO	Aryl-alcohol dehydrogenase related enzyme	FD25_GL001588	Lactobacillus acidifarinae DSM 19394	328	36,205	
A0A0R1LRV5	A0A0R1LRV5_9LACO	Alcohol dehydrogenase	FD25_GL002368	Lactobacillus acidifarinae DSM 19394	332	36,554	
A0A0R1LJP7	A0A0R1LJP7_9LACO	Oxidoreductase, aryl-alcohol dehydrogenase related	FD25_GL002296	Lactobacillus acidifarinae DSM 19394	338	37,528	
A0A0R1LFL7	A0A0R1LFL7_9LACO	Aryl-alcohol dehydrogenase related enzyme	FD25_GL001006	Lactobacillus acidifarinae DSM 19394	280	30,908	
A0A0R1K604	A0A0R1K604_9LACO	Alcohol dehydrogenase	FC67_GL000560	Lactobacillus alimentarius DSM 20249	347	37,125	
A0A0R1LT11	A0A0R1LT11_9LACO	Alcohol dehydrogenase	FD25_GL000537	Lactobacillus acidifarinae DSM 19394	345	36,372	
A0A0R1JVG6	A0A0R1JVG6_9LACO	Zinc-containing alcohol dehydrogenase superfamily protein	FC67_GL001524	Lactobacillus alimentarius DSM 20249	317	34,877	
A0A0R1LRR0	A0A0R1LRR0_9LACO	Aryl-alcohol dehydrogenase related enzyme	FD25_GL000778	Lactobacillus acidifarinae DSM 19394	318	35,73	
A0A0R1LIN5	A0A0R1LIN5_9LACO	Threonine dehydrogenase related Zn-dependent dehydrogenase	FD25_GL002260	Lactobacillus acidifarinae DSM 19394	335	35,664	
A0A0R1LRZ9	A0A0R1LRZ9_9LACO	Benzyl alcohol dehydrogenase AreB	FD25_GL000064	Lactobacillus acidifarinae DSM 19394	373	39,712	
A0A0R1LK03	A0A0R1LK03_9LACO	Aryl-alcohol dehydrogenase related enzyme	FD25_GL002413	Lactobacillus acidifarinae DSM 19394	352	38,831	
A0A0R1K428	A0A0R1K428_9LACO	Alcohol dehydrogenase zinc-binding domain-containing protein	FC67_GL001264	Lactobacillus alimentarius DSM 20249	318	33,622	
A0A0R2FKN3	A0A0R2FKN3_9LACO	Alcohol dehydrogenase	FD14_GL000368	Lactobacillus similis DSM 23365 = JCM 2765	338	35,855	
A0A0R2FBX6	A0A0R2FBX6_9LACO	Uncharacterized protein	FD14_GL000091	Lactobacillus similis DSM 23365 = JCM 2765	316	32,945	
A0A0R1MHK1	A0A0R1MHK1_9LACO	L-iditol 2-dehydrogenase	FD46_GL000804	Lactobacillus oeni DSM 19972	356	38,18	
A0A0R1SS22	A0A0R1SS22_9LACO	Short-chain alcohol dehydrogenase	FD08_GL000302	Lactobacillus parakefiri DSM 10551	253	26,812	
S2U4R1	S2U4R1_LACPA	Short-chain alcohol dehydrogenase	Lpp70_03601	Lactobacillus paracasei subsp. paracasei Lpp70	145	15,88	
A0A0R2FIY3	A0A0R2FIY3_9LACO	Zn-dependent alcohol dehydrogenase	FD14_GL000437	Lactobacillus similis DSM 23365 = JCM 2765	372	39,655	
A0A0R2FLA7	A0A0R2FLA7_9LACO	Alcohol dehydrogenase GroES domain-containing protein	FD14_GL000081	Lactobacillus similis DSM 23365 = JCM 2765	323	34,718	
A0A0R2F464	A0A0R2F464_9LACO	Alcohol dehydrogenase	FD14_GL000719	Lactobacillus similis DSM 23365 = JCM 2765	347	36,82	
S2U2B0	S2U2B0_LACPA	Short-chain alcohol dehydrogenase	Lpp70_03606	Lactobacillus paracasei subsp. paracasei Lpp70	132	14,146	
A0A0R1MC68	A0A0R1MC68_9LACO	Aryl-alcohol dehydrogenase related enzyme	FD46_GL000443	Lactobacillus oeni DSM 19972	295	32,877	
A0A0R2ES44	A0A0R2ES44_9LACO	(R,R)-butanediol dehydrogenase	FD14_GL002078	Lactobacillus similis DSM 23365 = JCM 2765	356	38,155	
A0A0R2ESA0	A0A0R2ESA0_9LACO	Aryl-alcohol dehydrogenase related enzyme	FD14_GL002143	Lactobacillus similis DSM 23365 = JCM 2765	280	30,803	
A0A0R2FQS6	A0A0R2FQS6_9LACO	Alcohol dehydrogenase	FD14_GL000071	Lactobacillus similis DSM 23365 = JCM 2765	348	36,837	
A0A0R1MKQ2	A0A0R1MKQ2_9LACO	Alcohol dehydrogenase, zinc-binding protein	FD46_GL001105	Lactobacillus oeni DSM 19972	345	38,25	
A0A0R2FE86	A0A0R2FE86_9LACO	Threonine dehydrogenase related Zn-dependent dehydrogenase	FD14_GL001372	Lactobacillus similis DSM 23365 = JCM 2765	346	36,922	
A0A0R2ETR9	A0A0R2ETR9_9LACO	Ethanol-active dehydrogenase acetaldehyde-active reductase	FD14_GL001663	Lactobacillus similis DSM 23365 = JCM 2765	339	36,06	
A0A0R2FBD9	A0A0R2FBD9_9LACO	Alcohol dehydrogenase zinc-binding domain-containing protein	FD14_GL000324	Lactobacillus similis DSM 23365 = JCM 2765	312	32,849	
A0A0R1SUH4	A0A0R1SUH4_9LACO	Short-chain alcohol dehydrogenase	FD08_GL003633	Lactobacillus parakefiri DSM 10551	253	26,71	
A0A0R1MKJ8	A0A0R1MKJ8_9LACO	Iron-containing alcohol dehydrogenase	FD46_GL001036	Lactobacillus oeni DSM 19972	384	41,741	
A0A0R2FBY2	A0A0R2FBY2_9LACO	Zn-dependent alcohol dehydrogenase	FD14_GL000582	Lactobacillus similis DSM 23365 = JCM 2765	363	38,243	
S2UBG5	S2UBG5_LACPA	Short-chain alcohol dehydrogenase	Lpp70_11057	Lactobacillus paracasei subsp. paracasei Lpp70	311	34,111	
A0A0R2ESI4	A0A0R2ESI4_9LACO	Iron-containing alcohol dehydrogenase	FD14_GL001704	Lactobacillus similis DSM 23365 = JCM 2765	400	43,517	
A0A0R1MMZ3	A0A0R1MMZ3_9LACO	Short-chain alcohol dehydrogenase	FD46_GL000753	Lactobacillus oeni DSM 19972	255	27,167	
A0A0R2F1Z4	A0A0R2F1Z4_9LACO	Alcohol dehydrogenase	FD14_GL002034	Lactobacillus similis DSM 23365 = JCM 2765	335	35,53	
A0A0R2FN19	A0A0R2FN19_9LACO	Aldehyde-alcohol dehydrogenase	FD14_GL002302	Lactobacillus similis DSM 23365 = JCM 2765	496	52,311	
A0A0R2EUU5	A0A0R2EUU5_9LACO	Alcohol dehydrogenase	FD14_GL001638	Lactobacillus similis DSM 23365 = JCM 2765	335	36,286	
A0A0R1SXR8	A0A0R1SXR8_9LACO	Nadph dependent r-specific alcohol dehydrogenase	FD08_GL002297	Lactobacillus parakefiri DSM 10551	252	26,781	
A0A0R1MBX6	A0A0R1MBX6_9LACO	Aryl-alcohol dehydrogenase related enzyme	FD46_GL000470	Lactobacillus oeni DSM 19972	284	32,052	
A0A0R1T7J4	A0A0R1T7J4_9LACO	Zinc-binding alcohol dehydrogenase family protein	FD08_GL001801	Lactobacillus parakefiri DSM 10551	342	37,823	
A0A0R1SNB7	A0A0R1SNB7_9LACO	L-iditol 2-dehydrogenase	FD08_GL001036	Lactobacillus parakefiri DSM 10551	350	37,743	
A0A0R1SQN8	A0A0R1SQN8_9LACO	L-iditol 2-dehydrogenase	FD08_GL001300	Lactobacillus parakefiri DSM 10551	356	38,442	
A0A0R1SPT3	A0A0R1SPT3_9LACO	Aryl-alcohol dehydrogenase	FD08_GL001173	Lactobacillus parakefiri DSM 10551	373	39,88	
A0A0R1T7N1	A0A0R1T7N1_9LACO	Aryl-alcohol dehydrogenase	FD08_GL001571	Lactobacillus parakefiri DSM 10551	184	19,304	
A0A0R1RPS2	A0A0R1RPS2_9LACO	Zinc-binding alcohol dehydrogenase family protein	FD08_GL003559	Lactobacillus parakefiri DSM 10551	358	39,028	
S2U7Y0	S2U7Y0_LACPA	Zinc-containing alcohol dehydrogenase (Fragment)	Lpp70_13519	Lactobacillus paracasei subsp. paracasei Lpp70	66	7,313	
S2U439	S2U439_LACPA	Alcohol dehydrogenase	Lpp70_00780	Lactobacillus paracasei subsp. paracasei Lpp70	282	29,911	
S2TSV1	S2TSV1_LACPA	Zinc-type alcohol dehydrogenase-like protein	Lpp70_11842	Lactobacillus paracasei subsp. paracasei Lpp70	340	36,181	
A0A0R1RNZ2	A0A0R1RNZ2_9LACO	Alcohol dehydrogenase GroES domain-containing protein	FD08_GL003324	Lactobacillus parakefiri DSM 10551	338	36,187	
A0A0E2M1V4	A0A0E2M1V4_LACCA	Alcohol dehydrogenase	N422_01925	Lactobacillus casei 5b	361	38,619	
A0A0R1T0R4	A0A0R1T0R4_9LACO	L-threonine 3-dehydrogenase	FD08_GL002405	Lactobacillus parakefiri DSM 10551	333	35,859	
S2TUK9	S2TUK9_LACPA	Alcohol-acetaldehyde dehydrogenase	Lpp70_10692	Lactobacillus paracasei subsp. paracasei Lpp70	397	43,179	
A0A0R1T4Y5	A0A0R1T4Y5_9LACO	Aryl-alcohol dehydrogenase	FD08_GL002752	Lactobacillus parakefiri DSM 10551	364	38,885	
A0A0R1SVE3	A0A0R1SVE3_9LACO	Alcohol dehydrogenase zinc-binding domain-containing protein	FD08_GL004224	Lactobacillus parakefiri DSM 10551	303	32,342	
A0A0R1T437	A0A0R1T437_9LACO	Aryl-alcohol dehydrogenase family enzyme	FD08_GL001443	Lactobacillus parakefiri DSM 10551	330	36,904	
A0A0R1SU10	A0A0R1SU10_9LACO	Alcohol dehydrogenase GroES domain protein	FD08_GL003613	Lactobacillus parakefiri DSM 10551	337	37,182	
A0A0R1SRL6	A0A0R1SRL6_9LACO	Alcohol dehydrogenase zinc-binding domain-containing protein	FD08_GL000626	Lactobacillus parakefiri DSM 10551	328	35,704	
A0A0R1T7B6	A0A0R1T7B6_9LACO	L-threonine 3-dehydrogenase	FD08_GL001816	Lactobacillus parakefiri DSM 10551	333	35,951	
S2UJ48	S2UJ48_LACPA	Aryl-alcohol dehydrogenase-like protein	Lpp70_04845	Lactobacillus paracasei subsp. paracasei Lpp70	334	37,036	
A0A0R1RIB5	A0A0R1RIB5_9LACO	Aryl-alcohol dehydrogenase	FD08_GL004268	Lactobacillus parakefiri DSM 10551	373	39,928	
A0A0R1T043	A0A0R1T043_9LACO	Aryl-alcohol dehydrogenase	FD08_GL001570	Lactobacillus parakefiri DSM 10551	100	10,471	
A0A0R1SWQ1	A0A0R1SWQ1_9LACO	Nadh-dependent (S)-specific alcohol dehydrogenase	FD08_GL002800	Lactobacillus parakefiri DSM 10551	347	36,957	
A0A0E2M1Z6	A0A0E2M1Z6_LACCA	Molecular chaperone GroES	N422_01290	Lactobacillus casei 5b	346	36,863	
A0A0R1SU53	A0A0R1SU53_9LACO	Zinc-binding alcohol dehydrogenase family protein	FD08_GL003941	Lactobacillus parakefiri DSM 10551	355	38,701	
A0A0R1R5N3	A0A0R1R5N3_9LACO	Alcohol dehydrogenase GroES domain-containing protein	FD08_GL000575	Lactobacillus parakefiri DSM 10551	317	34,323	
A0A0R1SEQ1	A0A0R1SEQ1_9LACO	Alcohol dehydrogenase GroES domain-containing protein	FD08_GL002453	Lactobacillus parakefiri DSM 10551	317	34,345	
A0A0R1SUH6	A0A0R1SUH6_9LACO	Alcohol dehydrogenase zinc-binding domain-containing protein	FD08_GL003624	Lactobacillus parakefiri DSM 10551	307	32,483	
A0A0R1RMX4	A0A0R1RMX4_9LACO	Alcohol dehydrogenase	FD08_GL004026	Lactobacillus parakefiri DSM 10551	294	31,822	
A0A0R1SRX6	A0A0R1SRX6_9LACO	Alcohol dehydrogenase zinc-binding domain-containing protein	FD08_GL000496	Lactobacillus parakefiri DSM 10551	304	32,568	
A0A0E2MDC1	A0A0E2MDC1_LACCA	Alcohol dehydrogenase	N422_07295	Lactobacillus casei 5b	350	38,249	
A0A0E2LY82	A0A0E2LY82_LACCA	Alcohol dehydrogenase	N422_07190	Lactobacillus casei 5b	347	38,35	
A0A0R1R4I4	A0A0R1R4I4_9LACO	Alcohol dehydrogenase GroES domain-containing protein	FD08_GL000262	Lactobacillus parakefiri DSM 10551	338	36,177	
A0A0A6NZA8	A0A0A6NZA8_9LACO	Alcohol dehydrogenase	PL11_03210	Lactobacillus curieae	338	37,263	
A0A0A6NWM8	A0A0A6NWM8_9LACO	Alcohol dehydrogenase	PL11_03935	Lactobacillus curieae	341	37,853	
W6TBX2	W6TBX2_9LACO	Alcohol dehydrogenase	LFAB_12855	Lactobacillus fabifermentans T30PCM01	329	34,271	
W6T6L0	W6T6L0_9LACO	Alcohol dehydrogenase	LFAB_10595	Lactobacillus fabifermentans T30PCM01	343	36,415	
W6TDH7	W6TDH7_9LACO	Alcohol dehydrogenase	LFAB_00885	Lactobacillus fabifermentans T30PCM01	304	32,247	
A0A0R1GQ70	A0A0R1GQ70_9LACO	Alcohol dehydrogenase, zinc-binding	FC28_GL000902	Lactobacillus crispatus DSM 20584 = JCM 1185	340	38,299	
W6T891	W6T891_9LACO	Alcohol dehydrogenase	LFAB_09540	Lactobacillus fabifermentans T30PCM01	158	18,062	
A0A0A6NSM5	A0A0A6NSM5_9LACO	Aryl-alcohol dehydrogenase	PL11_07015	Lactobacillus curieae	373	39,635	
A0A0A6RGG3	A0A0A6RGG3_9LACO	Butanediol dehydrogenase	PL11_02310	Lactobacillus curieae	349	37,376	
W6T4K5	W6T4K5_9LACO	Molecular chaperone GroES	LFAB_15585	Lactobacillus fabifermentans T30PCM01	346	36,669	
W6T3U2	W6T3U2_9LACO	Zinc-binding dehydrogenase	LFAB_17065	Lactobacillus fabifermentans T30PCM01	348	37,952	
A0A0A6NT78	A0A0A6NT78_9LACO	Aldehyde-alcohol dehydrogenase	PL11_06880	Lactobacillus curieae	869	94,989	
A0A0A6NVU9	A0A0A6NVU9_9LACO	Alcohol dehydrogenase	PL11_00245	Lactobacillus curieae	335	35,963	
W6T927	W6T927_9LACO	Molecular chaperone GroES	LFAB_04365	Lactobacillus fabifermentans T30PCM01	348	37,163	
A0A0A6RH36	A0A0A6RH36_9LACO	Alcohol dehydrogenase	PL11_03445	Lactobacillus curieae	345	37,541	
A0A0A6NV04	A0A0A6NV04_9LACO	Alcohol dehydrogenase	PL11_05565	Lactobacillus curieae	338	36,049	
A0A0R1GN65	A0A0R1GN65_9LACO	Aldehyde-alcohol dehydrogenase 2	FC28_GL001243	Lactobacillus crispatus DSM 20584 = JCM 1185	736	80,43	
A0A0R2I8T1	A0A0R2I8T1_9LACO	Mycothiol-dependent formaldehyde dehydrogenase	IV45_GL000727	Lactobacillus secaliphilus	340	36,098	
A0A0R2I3B1	A0A0R2I3B1_9LACO	Aldehyde-alcohol dehydrogenase	IV45_GL001325	Lactobacillus secaliphilus	877	96,671	
A0A0R2I2H9	A0A0R2I2H9_9LACO	Alcohol dehydrogenase, iron-dependent	IV45_GL001137	Lactobacillus secaliphilus	379	40,708	
A0A0R2IAS6	A0A0R2IAS6_9LACO	L-threonine 3-dehydrogenase	IV45_GL000991	Lactobacillus secaliphilus	344	36,865	
A0A0R2HZN7	A0A0R2HZN7_9LACO	Alcohol dehydrogenase	IV45_GL000768	Lactobacillus secaliphilus	344	37,234	
A0A0R2I417	A0A0R2I417_9LACO	Alcohol dehydrogenase GroES domain protein	IV45_GL000787	Lactobacillus secaliphilus	347	36,707	
A0A0R1PZQ3	A0A0R1PZQ3_9LACO	Aryl-alcohol dehydrogenase related enzyme	FD20_GL002235	Lactobacillus uvarum DSM 19971	305	34,113	
A0A0R1Q9H4	A0A0R1Q9H4_9LACO	Alcohol dehydrogenase, zinc-binding protein	FD20_GL000301	Lactobacillus uvarum DSM 19971	340	37,762	
A0A0R1PM55	A0A0R1PM55_9LACO	Alcohol dehydrogenase	FD20_GL002009	Lactobacillus uvarum DSM 19971	407	44,959	
A0A0R1Q3S7	A0A0R1Q3S7_9LACO	L-iditol 2-dehydrogenase	FD20_GL000758	Lactobacillus uvarum DSM 19971	358	38,792	
A0A0R1Q725	A0A0R1Q725_9LACO	Aryl-alcohol dehydrogenase-like protein	FD20_GL002264	Lactobacillus uvarum DSM 19971	330	37,388	
A0A0R1W1H6	A0A0R1W1H6_9LACO	Alcohol dehydrogenase	FD16_GL000728	Lactobacillus suebicus DSM 5007 = KCTC 3549	350	38,112	
A0A0R1W1X6	A0A0R1W1X6_9LACO	Short-chain alcohol dehydrogenase	FD16_GL000412	Lactobacillus suebicus DSM 5007 = KCTC 3549	273	28,905	
A0A0R1KPM7	A0A0R1KPM7_9LACO	Alcohol dehydrogenase	FD03_GL000879	Lactobacillus nodensis DSM 19682 = JCM 14932 = NBRC 107160	309	32,963	
A0A0R1W6P0	A0A0R1W6P0_9LACO	Threonine dehydrogenase related Zn-dependent dehydrogenase	FD16_GL001263	Lactobacillus suebicus DSM 5007 = KCTC 3549	349	37,407	
A0A0R1W0A7	A0A0R1W0A7_9LACO	Alcohol dehydrogenase	FD16_GL000994	Lactobacillus suebicus DSM 5007 = KCTC 3549	331	36,654	
A0A0R1W6B0	A0A0R1W6B0_9LACO	Aryl-alcohol dehydrogenase related enzyme	FD16_GL001339	Lactobacillus suebicus DSM 5007 = KCTC 3549	314	35,463	
A0A0R1VWY6	A0A0R1VWY6_9LACO	Iron-containing alcohol dehydrogenase	FD16_GL001503	Lactobacillus suebicus DSM 5007 = KCTC 3549	393	42,996	
A0A0R1K4R7	A0A0R1K4R7_9LACO	Alcohol dehydrogenase GroES domain protein	FD03_GL002334	Lactobacillus nodensis DSM 19682 = JCM 14932 = NBRC 107160	333	36,72	
A0A0R1KDY1	A0A0R1KDY1_9LACO	Alcohol dehydrogenase	FD03_GL000432	Lactobacillus nodensis DSM 19682 = JCM 14932 = NBRC 107160	326	35,35	
A0A0R1KB73	A0A0R1KB73_9LACO	Aryl-alcohol dehydrogenase	FD03_GL002009	Lactobacillus nodensis DSM 19682 = JCM 14932 = NBRC 107160	373	39,862	
A0A0R1W5X1	A0A0R1W5X1_9LACO	Alcohol dehydrogenase	FD16_GL001343	Lactobacillus suebicus DSM 5007 = KCTC 3549	345	36,967	
A0A0R1WC95	A0A0R1WC95_9LACO	Ethanol-active dehydrogenase acetaldehyde-active reductase	FD16_GL001372	Lactobacillus suebicus DSM 5007 = KCTC 3549	338	35,537	
A0A0R1KGX0	A0A0R1KGX0_9LACO	Bifunctional alcohol dehydrogenase acetaldehyde dehydrogenase	FD03_GL000463	Lactobacillus nodensis DSM 19682 = JCM 14932 = NBRC 107160	380	40,96	
A0A0R1W8G8	A0A0R1W8G8_9LACO	Aryl-alcohol dehydrogenase related enzyme	FD16_GL000420	Lactobacillus suebicus DSM 5007 = KCTC 3549	310	34,23	
A0A0R1W362	A0A0R1W362_9LACO	Short-chain alcohol dehydrogenase	FD16_GL002449	Lactobacillus suebicus DSM 5007 = KCTC 3549	252	26,86	
A0A0R1KAS1	A0A0R1KAS1_9LACO	Zinc-containing alcohol dehydrogenase	FD03_GL002306	Lactobacillus nodensis DSM 19682 = JCM 14932 = NBRC 107160	311	33,38	
A0A0R1KMI1	A0A0R1KMI1_9LACO	Alcohol dehydrogenase	FD03_GL000882	Lactobacillus nodensis DSM 19682 = JCM 14932 = NBRC 107160	347	37,168	
A0A0R1RBG6	A0A0R1RBG6_9LACO	Short-chain alcohol dehydrogenase	FD37_GL001808	Lactobacillus spicheri DSM 15429	264	29,111	
A0A0F4LR65	A0A0F4LR65_9LACO	Short-chain alcohol dehydrogenase	JF72_13810	Lactobacillus apis	295	31,454	
A0A0R1QTF1	A0A0R1QTF1_9LACO	Short-chain alcohol dehydrogenase	FD37_GL001887	Lactobacillus spicheri DSM 15429	252	26,64	
A0A0R1QYS5	A0A0R1QYS5_9LACO	Short-chain alcohol dehydrogenase	FD37_GL000653	Lactobacillus spicheri DSM 15429	246	25,963	
A0A0R1QSE8	A0A0R1QSE8_9LACO	Aryl-alcohol dehydrogenase related enzyme	FD37_GL002388	Lactobacillus spicheri DSM 15429	291	32,219	
A0A0R1QUY0	A0A0R1QUY0_9LACO	Alcohol dehydrogenase	FD37_GL001669	Lactobacillus spicheri DSM 15429	351	37,643	
A0A0R1QYK8	A0A0R1QYK8_9LACO	Alcohol dehydrogenase GroES domain protein	FD37_GL000888	Lactobacillus spicheri DSM 15429	333	36,402	
A0A0R1QXP0	A0A0R1QXP0_9LACO	Alcohol dehydrogenase	FD37_GL000878	Lactobacillus spicheri DSM 15429	345	36,386	
A0A0R1QXM1	A0A0R1QXM1_9LACO	Sorbitol dehydrogenase	FD37_GL000844	Lactobacillus spicheri DSM 15429	338	36,483	
A0A0P4V9H0	A0A0P4V9H0_9LACO	Molecular chaperone GroES	NBRC111452_1592	Lactobacillus farciminis	347	36,809	
A0A0R1QVE1	A0A0R1QVE1_9LACO	Alcohol dehydrogenase	FD37_GL001179	Lactobacillus spicheri DSM 15429	338	35,83	
A0A0R1R2P1	A0A0R1R2P1_9LACO	Zn-dependent alcohol dehydrogenase	FD37_GL001777	Lactobacillus spicheri DSM 15429	373	39,822	
A0A0R1R1V5	A0A0R1R1V5_9LACO	Aryl-alcohol dehydrogenase related enzyme	FD37_GL001729	Lactobacillus spicheri DSM 15429	327	35,668	
A0A0P4V930	A0A0P4V930_9LACO	Aryl-alcohol dehydrogenase	NBRC111452_136	Lactobacillus farciminis	373	39,796	
A0A0R1R4Y6	A0A0R1R4Y6_9LACO	Uncharacterized protein	FD37_GL001410	Lactobacillus spicheri DSM 15429	316	33,074	
A0A0R1R0C1	A0A0R1R0C1_9LACO	Aryl-alcohol dehydrogenase related enzyme	FD37_GL001983	Lactobacillus spicheri DSM 15429	333	37,304	
A0A0R1QXB6	A0A0R1QXB6_9LACO	Threonine dehydrogenase related Zn-dependent dehydrogenase	FD37_GL001147	Lactobacillus spicheri DSM 15429	336	35,904	
A0A0R1QZS4	A0A0R1QZS4_9LACO	Alcohol dehydrogenase	FD37_GL002447	Lactobacillus spicheri DSM 15429	347	36,233	
A0A0R1QV24	A0A0R1QV24_9LACO	Alcohol dehydrogenase	FD37_GL000651	Lactobacillus spicheri DSM 15429	338	36,02	
A0A0P4V5V8	A0A0P4V5V8_9LACO	Molecular chaperone GroES	NBRC111452_725	Lactobacillus farciminis	345	36,815	
A0A0A1GX05	A0A0A1GX05_9LACO	Alcohol dehydrogenase	LOOC260_109130	Lactobacillus hokkaidonensis JCM 18461	338	35,514	
A0A0R1QVV5	A0A0R1QVV5_9LACO	Aryl-alcohol dehydrogenase related enzyme	FD37_GL001075	Lactobacillus spicheri DSM 15429	335	37,166	
A0A0A1GSB5	A0A0A1GSB5_9LACO	Aryl-alcohol dehydrogenase related enzyme	LOOC260_103170	Lactobacillus hokkaidonensis JCM 18461	289	31,946	
A0A0R1QYD2	A0A0R1QYD2_9LACO	Zn-dependent alcohol dehydrogenase	FD37_GL000824	Lactobacillus spicheri DSM 15429	363	37,897	
A0A0A1GZ99	A0A0A1GZ99_9LACO	NADP-dependent aryl-alcohol dehydrogenase	LOOC260_118270	Lactobacillus hokkaidonensis JCM 18461	337	37,85	
A0A0A1GXI1	A0A0A1GXI1_9LACO	Alcohol dehydrogenase	LOOC260_105940	Lactobacillus hokkaidonensis JCM 18461	190	20,48	
A0A0A1GVX4	A0A0A1GVX4_9LACO	Alcohol dehydrogenase	LOOC260_105920	Lactobacillus hokkaidonensis JCM 18461	104	10,811	
A0A0A1GW97	A0A0A1GW97_9LACO	Possible alcohol dehydrogenase	adh LOOC260_107840	Lactobacillus hokkaidonensis JCM 18461	351	37,66	
H4GJ59	H4GJ59_9LACO	Short-chain alcohol dehydrogenase	PS3_14223	Lactobacillus gastricus PS3	257	28,037	
A0A0A1GW91	A0A0A1GW91_9LACO	Alcohol dehydrogenase	LOOC260_117590	Lactobacillus hokkaidonensis JCM 18461	368	38,945	
C0YYB2	C0YYB2_LACRE	GroES-like protein (EC 1.1.1.1)	adhA HMPREF0535_0777	Lactobacillus reuteri MM2-3	342	36,124	
A0A0A1GSD6	A0A0A1GSD6_9LACO	Aryl-alcohol dehydrogenase	LOOC260_106200	Lactobacillus hokkaidonensis JCM 18461	373	39,972	
A0A0A1GZ88	A0A0A1GZ88_9LACO	Alcohol dehydrogenase	LOOC260_118170	Lactobacillus hokkaidonensis JCM 18461	347	36,916	
C0YZB2	C0YZB2_LACRE	Alcohol dehydrogenase, iron-dependent (EC 1.1.1.1)	gldA HMPREF0535_1127	Lactobacillus reuteri MM2-3	373	40,699	
C0YYJ6	C0YYJ6_LACRE	GroES-like protein (EC 1.1.1.90)	xylB HMPREF0535_0861	Lactobacillus reuteri MM2-3	368	39,107	
C0YZD5	C0YZD5_LACRE	Putative chlorophyll synthesis pathway protein BchC (EC 1.1.1.103)	tdh HMPREF0535_1150	Lactobacillus reuteri MM2-3	336	35,918	
H4GJB8	H4GJB8_9LACO	Alcohol dehydrogenase	PS3_6948	Lactobacillus gastricus PS3	341	36,399	
H4GJC9	H4GJC9_9LACO	Alcohol dehydrogenase	PS3_2783	Lactobacillus gastricus PS3	340	35,984	
C0YZ02	C0YZ02_LACRE	Alcohol dehydrogenase, iron-dependent (EC 1.1.1.1)	HMPREF0535_1017	Lactobacillus reuteri MM2-3	379	40,929	
H4GK67	H4GK67_9LACO	Putative L-threonine 3-dehydrogenase	PS3_13220	Lactobacillus gastricus PS3	348	37,336	
C0YYF0	C0YYF0_LACRE	Zinc-binding alcohol dehydrogenase family protein (EC 1.-.-.-)	adh HMPREF0535_0815	Lactobacillus reuteri MM2-3	348	37,899	
H4GJ80	H4GJ80_9LACO	Benzyl alcohol dehydrogenase	PS3_20415	Lactobacillus gastricus PS3	364	38,471	
C0YZQ2	C0YZQ2_LACRE	Alcohol dehydrogenase, iron-dependent (EC 1.1.1.1)	dhaT HMPREF0535_1267	Lactobacillus reuteri MM2-3	405	44,011	
C0YYK8	C0YYK8_LACRE	GroES-like protein	HMPREF0535_0873	Lactobacillus reuteri MM2-3	351	37,668	
H4GJP9	H4GJP9_9LACO	Putative (R,R)-butanediol dehydrogenase	PS3_4374	Lactobacillus gastricus PS3	350	36,995	
S2QCZ8	S2QCZ8_LACPA	Short-chain alcohol dehydrogenase	Lpp14_06265	Lactobacillus paracasei subsp. paracasei Lpp14	311	34,085	
S2Q8U7	S2Q8U7_LACPA	Short-chain alcohol dehydrogenase	Lpp14_08159	Lactobacillus paracasei subsp. paracasei Lpp14	277	30,226	
A0A0R2FDR9	A0A0R2FDR9_WEICO	Short-chain alcohol dehydrogenase	IV69_GL001407	Weissella confusa (Lactobacillus confusus)	254	26,975	
S2QZK9	S2QZK9_LACPA	Aryl-alcohol dehydrogenase-like protein	Lpp14_03828	Lactobacillus paracasei subsp. paracasei Lpp14	334	37,036	
S2QCW0	S2QCW0_LACPA	Zinc-type alcohol dehydrogenase-like protein (Fragment)	Lpp14_06400	Lactobacillus paracasei subsp. paracasei Lpp14	153	16,136	
S2PZD9	S2PZD9_LACPA	Alcohol-acetaldehyde dehydrogenase	Lpp14_15101	Lactobacillus paracasei subsp. paracasei Lpp14	397	43,211	
S2QC81	S2QC81_LACPA	Zinc-type alcohol dehydrogenase-like protein (Fragment)	Lpp14_07263	Lactobacillus paracasei subsp. paracasei Lpp14	183	19,541	
A0A0H4QME2	A0A0H4QME2_9LACO	Aldehyde-alcohol dehydrogenase	ABM34_12530	Lactobacillus ginsenosidimutans	866	95,013	
S2QXX7	S2QXX7_LACPA	Bifunctional acetaldehyde-CoA/alcohol dehydrogenase (Fragment)	Lpp14_04439	Lactobacillus paracasei subsp. paracasei Lpp14	645	69,933	
S2QHE4	S2QHE4_LACPA	Bifunctional acetaldehyde-CoA/alcohol dehydrogenase (Fragment)	Lpp14_03408	Lactobacillus paracasei subsp. paracasei Lpp14	196	21,9	
A0A0R2F754	A0A0R2F754_WEICO	Aldehyde-alcohol dehydrogenase	IV69_GL000681	Weissella confusa (Lactobacillus confusus)	898	97,785	
A0A0H4QHD8	A0A0H4QHD8_9LACO	Aryl-alcohol dehydrogenase	ABM34_07355	Lactobacillus ginsenosidimutans	375	40,049	
S2Q4J5	S2Q4J5_LACPA	Putative zinc-type alcohol dehydrogenase-like protein AdhB	Lpp14_11833	Lactobacillus paracasei subsp. paracasei Lpp14	70	7,603	
A0A0H4QXI2	A0A0H4QXI2_9LACO	Alcohol dehydrogenase	ABM34_00620	Lactobacillus ginsenosidimutans	375	40,397	
A0A0R2F843	A0A0R2F843_WEICO	Alcohol dehydrogenase	IV69_GL000052	Weissella confusa (Lactobacillus confusus)	323	34,048	
A0A0H4QGN1	A0A0H4QGN1_9LACO	Alcohol dehydrogenase	ABM34_00450	Lactobacillus ginsenosidimutans	331	36,361	
A0A0R2F5L9	A0A0R2F5L9_WEICO	Uncharacterized protein	IV69_GL001696	Weissella confusa (Lactobacillus confusus)	348	37,233	
A0A0R2F886	A0A0R2F886_WEICO	Ethanol-active dehydrogenase acetaldehyde-active reductase	IV69_GL000091	Weissella confusa (Lactobacillus confusus)	348	37,291	
A0A0H4QF00	A0A0H4QF00_9LACO	Aryl-alcohol dehydrogenase	ABM34_02385	Lactobacillus ginsenosidimutans	373	39,821	
S2QK58	S2QK58_LACPA	Alcohol dehydrogenase (Fragment)	Lpp14_03643	Lactobacillus paracasei subsp. paracasei Lpp14	253	26,826	
A0A0H4QN87	A0A0H4QN87_9LACO	Molecular chaperone GroES	ABM34_12215	Lactobacillus ginsenosidimutans	346	36,909	
A0A0R2EQR4	A0A0R2EQR4_LACFE	Short-chain alcohol dehydrogenase	IV46_GL001835	Lactobacillus fermentum	255	27,748	
A0A0R1LEK7	A0A0R1LEK7_9LACO	Short-chain alcohol dehydrogenase	FC99_GL002456	Lactobacillus koreensis JCM 16448	252	26,735	
A0A0R1L3S7	A0A0R1L3S7_LACCU	Uncharacterized protein	FC08_GL001574	Lactobacillus curvatus JCM 1096 = DSM 20019	372	39,795	
A0A0G9GG89	A0A0G9GG89_LACFE	Butanediol dehydrogenase	WU69_01590	Lactobacillus fermentum	350	37,198	
A0A0R1L3D1	A0A0R1L3D1_9LACO	Alcohol dehydrogenase	FC99_GL000036	Lactobacillus koreensis JCM 16448	338	36,067	
A0A0F4HE99	A0A0F4HE99_LACFE	Alcohol dehydrogenase	UP21_02185	Lactobacillus fermentum	336	35,844	
A0A0F4HC44	A0A0F4HC44_LACFE	Molecular chaperone GroES	UP21_07015	Lactobacillus fermentum	346	36,789	
A0A0R1L124	A0A0R1L124_9LACO	Oxidoreductase, aryl-alcohol dehydrogenase related	FC99_GL001483	Lactobacillus koreensis JCM 16448	338	37,835	
A0A0R1LAF2	A0A0R1LAF2_9LACO	(R,R)-butanediol dehydrogenase	FC99_GL000340	Lactobacillus koreensis JCM 16448	360	38,67	
A0A0G9GHH4	A0A0G9GHH4_LACFE	Alcohol dehydrogenase	WU69_00025	Lactobacillus fermentum	339	35,711	
A0A0R2F0X9	A0A0R2F0X9_LACFE	(R,R)-butanediol dehydrogenase	IV46_GL000549	Lactobacillus fermentum	352	37,487	
A0A0R1L3E2	A0A0R1L3E2_LACCU	Zinc-containing alcohol dehydrogenase	FC08_GL001571	Lactobacillus curvatus JCM 1096 = DSM 20019	245	26,086	
A0A0R2EE96	A0A0R2EE96_LACFE	Aryl-alcohol dehydrogenase related enzyme	IV46_GL001180	Lactobacillus fermentum	238	27,035	
A0A0R2EHA3	A0A0R2EHA3_LACFE	Alcohol dehydrogenase	IV46_GL000800	Lactobacillus fermentum	277	28,842	
A0A0R2EHX6	A0A0R2EHX6_LACFE	Aryl-alcohol dehydrogenase	IV46_GL000786	Lactobacillus fermentum	373	39,76	
A0A0R2E539	A0A0R2E539_LACFE	Alcohol dehydrogenase	IV46_GL001292	Lactobacillus fermentum	339	35,779	
A0A0R2E209	A0A0R2E209_LACFE	Alcohol dehydrogenase	IV46_GL001330	Lactobacillus fermentum	356	37,968	
A0A0R2EUU6	A0A0R2EUU6_LACFE	S-(Hydroxymethyl)glutathione dehydrogenase	IV46_GL001720	Lactobacillus fermentum	346	36,76	
A0A0R1L4U1	A0A0R1L4U1_9LACO	Aryl-alcohol dehydrogenase	FC99_GL000004	Lactobacillus koreensis JCM 16448	374	39,735	
A0A0R1LIR2	A0A0R1LIR2_LACCU	Zinc-binding alcohol dehydrogenase family protein	FC08_GL000465	Lactobacillus curvatus JCM 1096 = DSM 20019	338	37,149	
A0A0R2EYY8	A0A0R2EYY8_LACFE	Aldehyde-alcohol dehydrogenase	IV46_GL000094	Lactobacillus fermentum	867	94,416	
A0A0R2E0G7	A0A0R2E0G7_LACFE	L-threonine 3-dehydrogenase	IV46_GL001510	Lactobacillus fermentum	356	38,348	
A0A0R1L966	A0A0R1L966_9LACO	Alcohol dehydrogenase	FC99_GL000136	Lactobacillus koreensis JCM 16448	352	37,545	
A0A0R1L5B9	A0A0R1L5B9_9LACO	Threonine dehydrogenase related Zn-dependent dehydrogenase	FC99_GL000959	Lactobacillus koreensis JCM 16448	333	35,661	
A0A0R1LKJ3	A0A0R1LKJ3_LACCU	Zinc-containing alcohol dehydrogenase(Oxidoreductase)	FC08_GL000647	Lactobacillus curvatus JCM 1096 = DSM 20019	327	35,397	
A0A0R1LN51	A0A0R1LN51_LACCU	Alcohol dehydrogenase GroES-like domain protein	FC08_GL000644	Lactobacillus curvatus JCM 1096 = DSM 20019	317	34,171	
A0A0G9GGF4	A0A0G9GGF4_LACFE	Aldehyde-alcohol dehydrogenase	WU69_00345	Lactobacillus fermentum	867	94,484	
A0A0F4HBU8	A0A0F4HBU8_LACFE	Aldehyde-alcohol dehydrogenase	UP21_06450	Lactobacillus fermentum	867	94,528	
A0A0R1L5J7	A0A0R1L5J7_9LACO	Aryl-alcohol dehydrogenase related enzyme	FC99_GL000873	Lactobacillus koreensis JCM 16448	333	37,124	
A0A0R1L6H3	A0A0R1L6H3_LACCU	Alcohol dehydrogenase GroES-like domain protein	FC08_GL000177	Lactobacillus curvatus JCM 1096 = DSM 20019	345	36,316	
A0A0R2EMT7	A0A0R2EMT7_LACFE	Alcohol dehydrogenase	IV46_GL001442	Lactobacillus fermentum	344	36,776	
A0A0F4HGW0	A0A0F4HGW0_LACFE	Alcohol dehydrogenase	UP21_01840	Lactobacillus fermentum	339	35,783	
A0A0F4HBI0	A0A0F4HBI0_LACFE	Alcohol dehydrogenase	UP21_07755	Lactobacillus fermentum	283	30,56	
A0A0R1L2K3	A0A0R1L2K3_9LACO	Threonine dehydrogenase related Zn-dependent dehydrogenase	FC99_GL000728	Lactobacillus koreensis JCM 16448	340	36,108	
A0A0F4HEE4	A0A0F4HEE4_LACFE	Alcohol dehydrogenase	UP21_07980	Lactobacillus fermentum	356	37,828	
A0A0G9GEX9	A0A0G9GEX9_LACFE	Alcohol dehydrogenase	WU68_00355	Lactobacillus fermentum	339	35,757	
A0A0R1L7S8	A0A0R1L7S8_9LACO	Aryl-alcohol dehydrogenase related enzyme	FC99_GL001434	Lactobacillus koreensis JCM 16448	323	35,382	
A0A0G9GCV6	A0A0G9GCV6_LACFE	Alcohol dehydrogenase	WU68_05635	Lactobacillus fermentum	356	37,939	
A0A0R1LH46	A0A0R1LH46_9LACO	Alcohol dehydrogenase	FC99_GL000941	Lactobacillus koreensis JCM 16448	303	32,099	
A0A0R2EGZ4	A0A0R2EGZ4_LACFE	Alcohol dehydrogenase	IV46_GL000781	Lactobacillus fermentum	356	37,927	
A0A0R2E076	A0A0R2E076_LACFE	Uncharacterized protein	IV46_GL001532	Lactobacillus fermentum	339	36,556	
A0A0R1LKJ8	A0A0R1LKJ8_LACCU	Alcohol dehydrogenase GroES-like domain protein	FC08_GL001656	Lactobacillus curvatus JCM 1096 = DSM 20019	311	33,787	
A0A0F4HCZ8	A0A0F4HCZ8_LACFE	Alcohol dehydrogenase	UP21_04070	Lactobacillus fermentum	336	35,835	
A0A0R1LC45	A0A0R1LC45_LACCU	Alcohol dehydrogenase GroES-like domain protein	FC08_GL000401	Lactobacillus curvatus JCM 1096 = DSM 20019	283	30,724	
A0A0G9GD26	A0A0G9GD26_LACFE	Aldehyde-alcohol dehydrogenase	WU68_03655	Lactobacillus fermentum	867	94,5	
A0A0G9G0W6	A0A0G9G0W6_LACFE	Alcohol dehydrogenase	WU69_08070	Lactobacillus fermentum	356	37,855	
A0A0R1L4B2	A0A0R1L4B2_9LACO	Alcohol dehydrogenase GroES domain protein	FC99_GL000745	Lactobacillus koreensis JCM 16448	333	36,457	
A0A0R2BMQ5	A0A0R2BMQ5_LACSD	Uncharacterized protein	FD36_GL000738	Lactobacillus sanfranciscensis (strain ATCC 27651 / DSM 20451 / JCM 5668 / KCTC 3205 / NCIMB 702811 / NRRL B-3934 / L-12)	341	37,179	
A0A0G9G498	A0A0G9G498_LACFE	Alcohol dehydrogenase	WU68_08950	Lactobacillus fermentum	336	35,841	
A0A0R2BL37	A0A0R2BL37_LACSD	Alcohol dehydrogenase	FD36_GL000366	Lactobacillus sanfranciscensis (strain ATCC 27651 / DSM 20451 / JCM 5668 / KCTC 3205 / NCIMB 702811 / NRRL B-3934 / L-12)	343	36,152	
A0A0M9D473	A0A0M9D473_9LACO	NADH-dependent (S)-specific alcohol dehydrogenase	RZ74_01230	Lactobacillus apinorum	346	36,912	
A0A0R2GP73	A0A0R2GP73_9LACO	Alcohol dehydrogenase, zinc-containing	FC77_GL001056	Lactobacillus acetotolerans DSM 20749 = JCM 3825	338	37,168	
A0A0R2GM49	A0A0R2GM49_9LACO	Zinc-containing alcohol dehydrogenase (Oxidoreductase)	FC77_GL000333	Lactobacillus acetotolerans DSM 20749 = JCM 3825	340	37,967	
A0A0R1YEK9	A0A0R1YEK9_9LACO	Iron-containing alcohol dehydrogenase	FD34_GL001116	Lactobacillus pontis DSM 8475	368	39,393	
A0A0R1Y755	A0A0R1Y755_9LACO	L-threonine 3-dehydrogenase	FD34_GL000943	Lactobacillus pontis DSM 8475	338	36,576	
A0A0R1YBL3	A0A0R1YBL3_9LACO	Uncharacterized protein	FD34_GL000044	Lactobacillus pontis DSM 8475	73	7,963	
A0A0R1Y6B4	A0A0R1Y6B4_9LACO	Alcohol dehydrogenase	FD34_GL000986	Lactobacillus pontis DSM 8475	221	23,435	
A0A0R1YFR0	A0A0R1YFR0_9LACO	Alcohol dehydrogenase	FD34_GL000524	Lactobacillus pontis DSM 8475	340	36,118	
F0TEG7	F0TEG7_LACAM	Aryl-alcohol dehydrogenase	LAC30SC_04355	Lactobacillus amylovorus	335	36,298	
F0TE67	F0TE67_LACAM	Aryl-alcohol dehydrogenase related enzyme	LAC30SC_05490	Lactobacillus amylovorus	73	8,087	
A0A0R1Y0Y8	A0A0R1Y0Y8_9LACO	Alcohol dehydrogenase	FD34_GL000306	Lactobacillus pontis DSM 8475	341	36,121	
A0A0R1XZV9	A0A0R1XZV9_9LACO	Aryl-alcohol dehydrogenase	FD34_GL000573	Lactobacillus pontis DSM 8475	373	39,75	
A0A0R1Y4Z8	A0A0R1Y4Z8_9LACO	Alcohol dehydrogenase	FD34_GL000043	Lactobacillus pontis DSM 8475	100	10,687	
A0A0R1Y717	A0A0R1Y717_9LACO	Alcohol dehydrogenase	FD34_GL001071	Lactobacillus pontis DSM 8475	349	37,857	
A0A0R2JW18	A0A0R2JW18_9LACO	Alcohol dehydrogenase zinc-binding domain-containing protein	IV52_GL001139	Lactobacillus lindneri DSM 20690 = JCM 11027	323	35,082	
A0A0R2JSD5	A0A0R2JSD5_9LACO	Short-chain alcohol dehydrogenase	IV52_GL000126	Lactobacillus lindneri DSM 20690 = JCM 11027	252	27,005	
A0A0R2K0H1	A0A0R2K0H1_9LACO	Uncharacterized protein	IV52_GL000157	Lactobacillus lindneri DSM 20690 = JCM 11027	341	37,036	
A0A0R2JNV2	A0A0R2JNV2_9LACO	Alcohol dehydrogenase	IV52_GL001123	Lactobacillus lindneri DSM 20690 = JCM 11027	349	37,615	
A0A0R2JWP7	A0A0R2JWP7_9LACO	L-iditol 2-dehydrogenase	IV52_GL000339	Lactobacillus lindneri DSM 20690 = JCM 11027	369	40,21	
B2GBX8	B2GBX8_LACF3	Alcohol dehydrogenase	LAF_0824	Lactobacillus fermentum (strain NBRC 3956 / LMG 18251)	247	26,279	
A0A0R2JVN9	A0A0R2JVN9_9LACO	Alcohol dehydrogenase	IV52_GL000940	Lactobacillus lindneri DSM 20690 = JCM 11027	343	36,297	
B2GC97	B2GC97_LACF3	Dehydrogenase	LAF_0943	Lactobacillus fermentum (strain NBRC 3956 / LMG 18251)	350	37,197	
B2GDH6	B2GDH6_LACF3	Alcohol dehydrogenase	LAF_1372	Lactobacillus fermentum (strain NBRC 3956 / LMG 18251)	356	37,934	
B2GFB6	B2GFB6_LACF3	Alcohol dehydrogenase	LAF_0169	Lactobacillus fermentum (strain NBRC 3956 / LMG 18251)	346	36,757	
B2GCC6	B2GCC6_LACF3	Alcohol dehydrogenase	LAF_0972	Lactobacillus fermentum (strain NBRC 3956 / LMG 18251)	356	37,8	
B2GBV1	B2GBV1_LACF3	Benzyl alcohol dehydrogenase	LAF_0797	Lactobacillus fermentum (strain NBRC 3956 / LMG 18251)	363	39,029	
B2GET1	B2GET1_LACF3	Dehydrogenase	LAF_1827	Lactobacillus fermentum (strain NBRC 3956 / LMG 18251)	336	35,835	
B2GE33	B2GE33_LACF3	Alcohol dehydrogenase	LAF_1579	Lactobacillus fermentum (strain NBRC 3956 / LMG 18251)	347	37,11	
B2GDY2	B2GDY2_LACF3	Alcohol dehydrogenase	LAF_1528	Lactobacillus fermentum (strain NBRC 3956 / LMG 18251)	339	35,783	
F6CE97	F6CE97_LACKZ	Aryl-alcohol dehydrogenase	adhC WANG_0781	Lactobacillus kefiranofaciens (strain ZW3)	373	40,15	
R6SVJ2	R6SVJ2_9LACO	Aldehyde-alcohol dehydrogenase	BN628_00295	Lactobacillus ruminis CAG:367	462	49,126	
E1JM09	E1JM09_9LACO	GroES-like protein	HMPREF9269_1820	Lactobacillus salivarius ACS-116-V-Col5a	373	40,175	
R6T9I4	R6T9I4_9LACO	Aryl-alcohol dehydrogenase	BN628_00786	Lactobacillus ruminis CAG:367	371	39,913	
R6SE07	R6SE07_9LACO	Aldehyde-alcohol dehydrogenase	BN628_00279	Lactobacillus ruminis CAG:367	898	98,676	
E1JNE0	E1JNE0_9LACO	GroES-like protein	HMPREF9269_0497	Lactobacillus salivarius ACS-116-V-Col5a	349	38,207	
R6SFS2	R6SFS2_9LACO	Alcohol dehydrogenase	BN628_01065	Lactobacillus ruminis CAG:367	346	36,858	
E1JNE1	E1JNE1_9LACO	Putative chlorophyll synthesis pathway protein BchC	HMPREF9269_0498	Lactobacillus salivarius ACS-116-V-Col5a	357	38,79	
A0A0R1QTK5	A0A0R1QTK5_9LACO	Alcohol dehydrogenase	FD29_GL002112	Lactobacillus mindensis DSM 14500	347	36,97	
A0A0C9PP63	A0A0C9PP63_LACPA	Short-chain alcohol dehydrogenase	LC0644_1295	Lactobacillus paracasei NRIC 0644	311	34,085	
A0A0R1QGL8	A0A0R1QGL8_9LACO	Short-chain alcohol dehydrogenase	FD29_GL000664	Lactobacillus mindensis DSM 14500	264	29,265	
A0A0R1QTE3	A0A0R1QTE3_9LACO	Alcohol dehydrogenase zinc-binding domain-containing protein	FD29_GL002080	Lactobacillus mindensis DSM 14500	275	28,889	
A0A0R1QRD6	A0A0R1QRD6_9LACO	Short-chain alcohol dehydrogenase	FD29_GL000811	Lactobacillus mindensis DSM 14500	240	26,011	
A0A0C9PSR6	A0A0C9PSR6_LACPA	Short-chain alcohol dehydrogenase	LC0644_2580	Lactobacillus paracasei NRIC 0644	277	30,196	
A0A0R1QF95	A0A0R1QF95_9LACO	Alcohol dehydrogenase	FD29_GL001232	Lactobacillus mindensis DSM 14500	346	36,941	
A0A0R1QT26	A0A0R1QT26_9LACO	Aryl-alcohol dehydrogenase	FD29_GL001927	Lactobacillus mindensis DSM 14500	379	40,44	
A0A0R1QL94	A0A0R1QL94_9LACO	Alcohol dehydrogenase, zinc-binding protein	FD29_GL001538	Lactobacillus mindensis DSM 14500	338	37,925	
A0A0C9PLY5	A0A0C9PLY5_LACPA	Alcohol-acetaldehyde dehydrogenase	LC0644_0585	Lactobacillus paracasei NRIC 0644	397	43,179	
A0A0C9QB79	A0A0C9QB79_LACPA	Alcohol dehydrogenase	LC0644_0497	Lactobacillus paracasei NRIC 0644	346	36,719	
A0A0C9QE99	A0A0C9QE99_LACPA	Zinc-type alcohol dehydrogenase-like protein MW2112	LC0644_2691	Lactobacillus paracasei NRIC 0644	340	37,339	
A0A0C9QDN9	A0A0C9QDN9_LACPA	Zinc-containing alcohol dehydrogenase superfamily protein	LC0644_2471	Lactobacillus paracasei NRIC 0644	319	33,351	
A0A0C9QFR7	A0A0C9QFR7_LACPA	Aryl-alcohol dehydrogenase family enzyme	LC0644_1997	Lactobacillus paracasei NRIC 0644	334	37,02	
A0A0R2BED3	A0A0R2BED3_LACCL	Iron-containing alcohol dehydrogenase	FC82_GL002925	Lactobacillus collinoides DSM 20515 = JCM 1123	397	43,513	
A0A0R2BNX2	A0A0R2BNX2_LACCL	Zinc-binding alcohol dehydrogenase family protein	FC82_GL000438	Lactobacillus collinoides DSM 20515 = JCM 1123	350	37,742	
A0A0R1LQ35	A0A0R1LQ35_9LACO	Ethanol-active dehydrogenase acetaldehyde-active reductase	FD04_GL000905	Lactobacillus odoratitofui DSM 19909 = JCM 15043	341	36,461	
A0A0R2N7B2	A0A0R2N7B2_9LACO	Short-chain alcohol dehydrogenase	IV63_GL001210	Lactobacillus crustorum	264	29,538	
A0A0R1LWA0	A0A0R1LWA0_9LACO	Short-chain alcohol dehydrogenase	FD04_GL002430	Lactobacillus odoratitofui DSM 19909 = JCM 15043	220	23,367	
A0A0R2BK77	A0A0R2BK77_LACCL	2,3-butanediol dehydrogenase	FC82_GL001440	Lactobacillus collinoides DSM 20515 = JCM 1123	311	32,934	
A0A0R1LXF0	A0A0R1LXF0_9LACO	Short-chain alcohol dehydrogenase	FD04_GL001818	Lactobacillus odoratitofui DSM 19909 = JCM 15043	240	25,616	
A0A0R1LNT3	A0A0R1LNT3_9LACO	Zn-dependent alcohol dehydrogenase	FD04_GL001563	Lactobacillus odoratitofui DSM 19909 = JCM 15043	386	41,588	
A0A0R2N816	A0A0R2N816_9LACO	Short-chain alcohol dehydrogenase	IV63_GL000099	Lactobacillus crustorum	234	25,309	
A0A0R2BHU2	A0A0R2BHU2_LACCL	Short-chain alcohol dehydrogenase	FC82_GL002463	Lactobacillus collinoides DSM 20515 = JCM 1123	76	8,241	
A0A0R2BP62	A0A0R2BP62_LACCL	Aryl-alcohol dehydrogenase related enzyme	FC82_GL000537	Lactobacillus collinoides DSM 20515 = JCM 1123	281	31,149	
A0A0R2BET7	A0A0R2BET7_LACCL	Aryl-alcohol dehydrogenase	FC82_GL000465	Lactobacillus collinoides DSM 20515 = JCM 1123	377	39,585	
A0A0R2BLR6	A0A0R2BLR6_LACCL	Short-chain alcohol dehydrogenase	FC82_GL001602	Lactobacillus collinoides DSM 20515 = JCM 1123	256	27,653	
A0A0R1LRF1	A0A0R1LRF1_9LACO	Aryl-alcohol dehydrogenase related enzyme	FD04_GL001058	Lactobacillus odoratitofui DSM 19909 = JCM 15043	283	31,086	
A0A0R2BDC8	A0A0R2BDC8_LACCL	Aryl-alcohol dehydrogenase related enzyme	FC82_GL000485	Lactobacillus collinoides DSM 20515 = JCM 1123	334	37,115	
A0A0R2BBM3	A0A0R2BBM3_LACCL	Alcohol dehydrogenase	FC82_GL001305	Lactobacillus collinoides DSM 20515 = JCM 1123	302	32,735	
A0A0R2BAT0	A0A0R2BAT0_LACCL	Aryl-alcohol dehydrogenase related enzyme	FC82_GL001757	Lactobacillus collinoides DSM 20515 = JCM 1123	326	35,63	
A0A0R2BCY2	A0A0R2BCY2_LACCL	Threonine dehydrogenase related Zn-dependent dehydrogenase	FC82_GL000372	Lactobacillus collinoides DSM 20515 = JCM 1123	346	36,466	
A0A0R2BFZ0	A0A0R2BFZ0_LACCL	Zn-dependent alcohol dehydrogenase	FC82_GL002739	Lactobacillus collinoides DSM 20515 = JCM 1123	373	39,886	
A0A0R2B668	A0A0R2B668_LACCL	Threonine dehydrogenase related Zn-dependent dehydrogenase	FC82_GL002806	Lactobacillus collinoides DSM 20515 = JCM 1123	333	35,72	
A0A0R1LW59	A0A0R1LW59_9LACO	Alcohol dehydrogenase GroES domain protein	FD04_GL002200	Lactobacillus odoratitofui DSM 19909 = JCM 15043	339	36,635	
A0A0R2BD74	A0A0R2BD74_LACCL	(R,R)-butanediol dehydrogenase	FC82_GL002118	Lactobacillus collinoides DSM 20515 = JCM 1123	356	38,213	
A0A0R2B5J8	A0A0R2B5J8_LACCL	Short-chain alcohol dehydrogenase	FC82_GL003268	Lactobacillus collinoides DSM 20515 = JCM 1123	260	28,038	
A0A0R1LZ28	A0A0R1LZ28_9LACO	Alcohol dehydrogenase GroES domain-containing protein	FD04_GL001654	Lactobacillus odoratitofui DSM 19909 = JCM 15043	323	34,72	
A0A0R1LXS8	A0A0R1LXS8_9LACO	Alcohol dehydrogenase	FD04_GL000780	Lactobacillus odoratitofui DSM 19909 = JCM 15043	355	37,803	
A0A0R2BCL0	A0A0R2BCL0_LACCL	Zinc-containing alcohol dehydrogenase	FC82_GL000388	Lactobacillus collinoides DSM 20515 = JCM 1123	329	35,401	
A0A0R2BC19	A0A0R2BC19_LACCL	Alcohol dehydrogenase	FC82_GL000334	Lactobacillus collinoides DSM 20515 = JCM 1123	348	37,822	
A0A0R2B4B6	A0A0R2B4B6_LACCL	Ethanol-active dehydrogenase acetaldehyde-active reductase	FC82_GL000234	Lactobacillus collinoides DSM 20515 = JCM 1123	340	36,307	
A0A0R2B7L1	A0A0R2B7L1_LACCL	Benzyl alcohol dehydrogenase AreB	FC82_GL002584	Lactobacillus collinoides DSM 20515 = JCM 1123	393	41,926	
A0A0R2BE56	A0A0R2BE56_LACCL	Alcohol dehydrogenase	FC82_GL000335	Lactobacillus collinoides DSM 20515 = JCM 1123	401	43,608	
A0A0R1LSX5	A0A0R1LSX5_9LACO	Threonine dehydrogenase related Zn-dependent dehydrogenase	FD04_GL000308	Lactobacillus odoratitofui DSM 19909 = JCM 15043	342	36,261	
A0A0R2B8T9	A0A0R2B8T9_LACCL	Alcohol dehydrogenase	FC82_GL002057	Lactobacillus collinoides DSM 20515 = JCM 1123	354	37,431	
A0A0R2BAJ1	A0A0R2BAJ1_LACCL	Alcohol dehydrogenase GroES domain protein	FC82_GL002811	Lactobacillus collinoides DSM 20515 = JCM 1123	333	35,674	
A0A0R2BDW4	A0A0R2BDW4_LACCL	Aldehyde-alcohol dehydrogenase 2	FC82_GL003098	Lactobacillus collinoides DSM 20515 = JCM 1123	362	39,36	
A0A0R1LSU6	A0A0R1LSU6_9LACO	Alcohol dehydrogenase	FD04_GL000653	Lactobacillus odoratitofui DSM 19909 = JCM 15043	340	36,274	
A0A0R1LPP3	A0A0R1LPP3_9LACO	Aryl-alcohol dehydrogenase related enzyme	FD04_GL001474	Lactobacillus odoratitofui DSM 19909 = JCM 15043	326	35,753	
A0A0R2N517	A0A0R2N517_9LACO	Alcohol dehydrogenase zinc-binding domain-containing protein	IV63_GL002138	Lactobacillus crustorum	317	33,562	
A0A0R2NB66	A0A0R2NB66_9LACO	Alcohol dehydrogenase, zinc-containing	IV63_GL000234	Lactobacillus crustorum	336	37,101	
A0A0R2N7L1	A0A0R2N7L1_9LACO	Aldehyde-alcohol dehydrogenase	IV63_GL000722	Lactobacillus crustorum	872	94,948	
A0A0R2N5U8	A0A0R2N5U8_9LACO	Alcohol dehydrogenase	IV63_GL000536	Lactobacillus crustorum	347	36,756	
A0A0R2MZJ4	A0A0R2MZJ4_9LACO	(R,R)-butanediol dehydrogenase	IV63_GL001568	Lactobacillus crustorum	360	38,809	
A0A0R2N6Q8	A0A0R2N6Q8_9LACO	Alcohol dehydrogenase, zinc-binding protein	IV63_GL001246	Lactobacillus crustorum	338	37,67	
A0A0R2N320	A0A0R2N320_9LACO	Aryl-alcohol dehydrogenase	IV63_GL001063	Lactobacillus crustorum	373	39,893	
A0A0R1J5K7	A0A0R1J5K7_9LACO	Zinc-containing alcohol dehydrogenase	FC72_GL001203	Lactobacillus tucceti DSM 20183	310	33,68	
X0PJR6	X0PJR6_9LACO	2,3-butanediol dehydrogenase, S-alcohol forming, (R)-acetoin-specific	JCM14108_2513	Lactobacillus farraginis DSM 18382 = JCM 14108	256	27,374	
A0A0R1J9U5	A0A0R1J9U5_9LACO	Alcohol dehydrogenase zinc-binding domain-containing protein	FC72_GL000224	Lactobacillus tucceti DSM 20183	317	33,51	
A0A0R1J9S7	A0A0R1J9S7_9LACO	Alcohol dehydrogenase	FC72_GL001042	Lactobacillus tucceti DSM 20183	346	37,088	
A0A0R1IZ82	A0A0R1IZ82_9LACO	Alcohol dehydrogenase	FC72_GL000604	Lactobacillus tucceti DSM 20183	342	37,658	
A0A0R1JAX9	A0A0R1JAX9_9LACO	Alcohol dehydrogenase	FC72_GL000913	Lactobacillus tucceti DSM 20183	346	37,007	
X0PKK0	X0PKK0_9LACO	Bifunctional protein: zinc-containing alcohol dehydrogenase	JCM14108_2209	Lactobacillus farraginis DSM 18382 = JCM 14108	148	16,539	
A0A0R2AVY1	A0A0R2AVY1_9LACO	Alcohol dehydrogenase superfamily,zinc-containing protein	FC48_GL001446	Lactobacillus murinus DSM 20452 = NBRC 14221	360	38,285	
X0QEZ2	X0QEZ2_9LACO	Bifunctional protein: zinc-containing alcohol dehydrogenase	JCM14108_2208	Lactobacillus farraginis DSM 18382 = JCM 14108	165	17,643	
X0PB35	X0PB35_9LACO	Alcohol dehydrogenase	JCM14108_1886	Lactobacillus farraginis DSM 18382 = JCM 14108	193	20,699	
A0A0R1VKM1	A0A0R1VKM1_9LACO	Aryl-alcohol dehydrogenase	FD41_GL000631	Lactobacillus farraginis DSM 18382 = JCM 14108	373	39,925	
X0P9V1	X0P9V1_9LACO	Alcohol dehydrogenase	JCM14108_929	Lactobacillus farraginis DSM 18382 = JCM 14108	275	29,292	
C7XVP9	C7XVP9_9LACO	Alcohol dehydrogenase, propanol-preferring (EC 1.1.1.1)	adhP HMPREF0501_00793	Lactobacillus coleohominis 101-4-CHN	341	36,152	
X0QEY0	X0QEY0_9LACO	Alcohol dehydrogenase	JCM14108_2193	Lactobacillus farraginis DSM 18382 = JCM 14108	96	10,997	
A0A0R1W0Q7	A0A0R1W0Q7_9LACO	Alcohol dehydrogenase	FD41_GL000330	Lactobacillus farraginis DSM 18382 = JCM 14108	383	41,544	
A0A0R2BA10	A0A0R2BA10_9LACO	Alcohol dehydrogenase, iron-dependent	FC48_GL001913	Lactobacillus murinus DSM 20452 = NBRC 14221	379	41,089	
C7XVJ6	C7XVJ6_9LACO	Zinc-binding alcohol dehydrogenase family protein (EC 1.-.-.-)	HMPREF0501_00740	Lactobacillus coleohominis 101-4-CHN	344	37,598	
X0PKI8	X0PKI8_9LACO	Alcohol dehydrogenase	JCM14108_2194	Lactobacillus farraginis DSM 18382 = JCM 14108	782	84,625	
X0PIX5	X0PIX5_9LACO	Alcohol dehydrogenase	JCM14108_2137	Lactobacillus farraginis DSM 18382 = JCM 14108	379	41,132	
X0PAW4	X0PAW4_9LACO	Alcohol dehydrogenase	JCM14108_1887	Lactobacillus farraginis DSM 18382 = JCM 14108	180	19,537	
A0A0R1VRS8	A0A0R1VRS8_9LACO	Alcohol dehydrogenase	FD41_GL000924	Lactobacillus farraginis DSM 18382 = JCM 14108	338	36,176	
C7XXF3	C7XXF3_9LACO	Putative chlorophyll synthesis pathway protein BchC	HMPREF0501_01498	Lactobacillus coleohominis 101-4-CHN	336	35,868	
A0A0R1Z9F9	A0A0R1Z9F9_9LACO	Nadph dependent r-specific alcohol dehydrogenase	FC95_GL000191	Lactobacillus kefiri DSM 20587 = JCM 5818	252	26,781	
A0A0R1ZRH9	A0A0R1ZRH9_9LACO	Short-chain alcohol dehydrogenase	FC95_GL000856	Lactobacillus kefiri DSM 20587 = JCM 5818	253	26,812	
A0A0R1FF42	A0A0R1FF42_LACBR	Short-chain alcohol dehydrogenase	FC61_GL001894	Lactobacillus brevis ATCC 14869 = DSM 20054	238	24,867	
A0A0R1Z9I3	A0A0R1Z9I3_9LACO	Nadh-dependent (S)-specific alcohol dehydrogenase	FC95_GL001558	Lactobacillus kefiri DSM 20587 = JCM 5818	347	36,957	
U2NYM6	U2NYM6_LACBR	Short-chain alcohol dehydrogenase (Fragment)	HMPREF0495_01617	Lactobacillus brevis ATCC 14869 = DSM 20054	157	16,772	
A0A0R1Z6W8	A0A0R1Z6W8_9LACO	Aryl-alcohol dehydrogenase	FC95_GL002101	Lactobacillus kefiri DSM 20587 = JCM 5818	364	38,885	
A0A0R1FJ00	A0A0R1FJ00_LACBR	Threonine dehydrogenase related Zn-dependent dehydrogenase	FC61_GL000462	Lactobacillus brevis ATCC 14869 = DSM 20054	342	36,358	
U2R5U0	U2R5U0_LACBR	Alcohol dehydrogenase, iron-dependent	HMPREF0495_00102	Lactobacillus brevis ATCC 14869 = DSM 20054	413	45,341	
A0A0R1FQ28	A0A0R1FQ28_LACBR	Aryl-alcohol dehydrogenase related enzyme	FC61_GL001284	Lactobacillus brevis ATCC 14869 = DSM 20054	327	35,758	
A0A0R1FN44	A0A0R1FN44_LACBR	Aryl-alcohol dehydrogenase related enzyme	FC61_GL002094	Lactobacillus brevis ATCC 14869 = DSM 20054	343	38,46	
A0A0R1ZGK8	A0A0R1ZGK8_9LACO	Alcohol dehydrogenase zinc-binding domain-containing protein	FC95_GL000143	Lactobacillus kefiri DSM 20587 = JCM 5818	303	32,342	
A0A0R1ZSR3	A0A0R1ZSR3_9LACO	Zinc-binding alcohol dehydrogenase family protein	FC95_GL000359	Lactobacillus kefiri DSM 20587 = JCM 5818	355	38,701	
A0A0R1ZF56	A0A0R1ZF56_9LACO	Aryl-alcohol dehydrogenase family enzyme	FC95_GL000695	Lactobacillus kefiri DSM 20587 = JCM 5818	330	36,904	
A0A0R1ZGE5	A0A0R1ZGE5_9LACO	L-threonine 3-dehydrogenase	FC95_GL000905	Lactobacillus kefiri DSM 20587 = JCM 5818	333	35,859	
A0A0R1ZSJ2	A0A0R1ZSJ2_9LACO	Alcohol dehydrogenase GroES domain-containing protein	FC95_GL000600	Lactobacillus kefiri DSM 20587 = JCM 5818	338	36,187	
A0A0R1ZDI0	A0A0R1ZDI0_9LACO	Alcohol dehydrogenase GroES domain-containing protein	FC95_GL001267	Lactobacillus kefiri DSM 20587 = JCM 5818	317	34,323	
A0A0R1FIU3	A0A0R1FIU3_LACBR	Aryl-alcohol dehydrogenase related enzyme	FC61_GL000182	Lactobacillus brevis ATCC 14869 = DSM 20054	318	35,453	
A0A0R1ZTL6	A0A0R1ZTL6_9LACO	L-iditol 2-dehydrogenase	FC95_GL001732	Lactobacillus kefiri DSM 20587 = JCM 5818	356	38,442	
U2PAM1	U2PAM1_LACBR	Short-chain alcohol dehydrogenase	HMPREF0495_02604	Lactobacillus brevis ATCC 14869 = DSM 20054	236	25,581	
U2NZ70	U2NZ70_LACBR	GroES-like protein	HMPREF0495_01518	Lactobacillus brevis ATCC 14869 = DSM 20054	347	36,937	
A0A0R1ZBG1	A0A0R1ZBG1_9LACO	Aryl-alcohol dehydrogenase	FC95_GL001487	Lactobacillus kefiri DSM 20587 = JCM 5818	373	39,928	
A0A0R1PG50	A0A0R1PG50_9LACO	L-threonine 3-dehydrogenase	FD27_GL000496	Lactobacillus frumenti DSM 13145	337	36,033	
A0A0R1FI60	A0A0R1FI60_LACBR	Iron-containing alcohol dehydrogenase	FC61_GL001110	Lactobacillus brevis ATCC 14869 = DSM 20054	362	39,42	
A0A0R1P8U8	A0A0R1P8U8_9LACO	L-threonine 3-dehydrogenase	FD27_GL001463	Lactobacillus frumenti DSM 13145	339	36,791	
A0A0R1PB35	A0A0R1PB35_9LACO	Aryl-alcohol dehydrogenase	FD27_GL000923	Lactobacillus frumenti DSM 13145	363	38,491	
A0A0R1PBN1	A0A0R1PBN1_9LACO	Alcohol dehydrogenase	FD27_GL000310	Lactobacillus frumenti DSM 13145	346	37,522	
A0A0R1PFF6	A0A0R1PFF6_9LACO	Uncharacterized protein	FD27_GL000926	Lactobacillus frumenti DSM 13145	308	33,31	
A0A0R1P5G6	A0A0R1P5G6_9LACO	Aryl-alcohol dehydrogenase	FD27_GL000598	Lactobacillus frumenti DSM 13145	373	39,877	
A0A0R1PHQ7	A0A0R1PHQ7_9LACO	Alcohol dehydrogenase GroES domain protein	FD27_GL000346	Lactobacillus frumenti DSM 13145	340	35,995	
A0A0R1PBE3	A0A0R1PBE3_9LACO	Alcohol dehydrogenase	FD27_GL001007	Lactobacillus frumenti DSM 13145	341	36,067	
S5NWP6	S5NWP6_LACRE	Alcohol dehydrogenase	N134_08460	Lactobacillus reuteri TD1	348	37,821	
S5N864	S5N864_LACRE	Molecular chaperone GroES	N134_08805	Lactobacillus reuteri TD1	351	37,499	
F0JZL8	F0JZL8_LACD2	Alcohol-acetaldehyde dehydrogenase	LBU_1456	Lactobacillus delbrueckii subsp. bulgaricus (strain 2038)	63	6,561	
S5N700	S5N700_LACRE	Alcohol dehydrogenase	N134_09840	Lactobacillus reuteri TD1	336	35,976	
S5NQF3	S5NQF3_LACRE	Alcohol dehydrogenase	N134_08195	Lactobacillus reuteri TD1	342	36,174	
F0K1Z7	F0K1Z7_LACD2	Putative alcohol-acetaldehyde dehydrogenase	LBU_0777	Lactobacillus delbrueckii subsp. bulgaricus (strain 2038)	313	34,113	
F0JZL9	F0JZL9_LACD2	Alcohol-acetaldehyde dehydrogenase	LBU_1457	Lactobacillus delbrueckii subsp. bulgaricus (strain 2038)	345	37,438	
A0A0M0CDY9	A0A0M0CDY9_LACPN	Alcohol dehydrogenase	ADS73_12455	Lactobacillus plantarum	157	17,756	
A0A0M0CFI9	A0A0M0CFI9_LACPN	Alcohol dehydrogenase	ADS73_09290	Lactobacillus plantarum	316	34,26	
A0A0M0CFG4	A0A0M0CFG4_LACPN	Alcohol dehydrogenase	ADS73_09345	Lactobacillus plantarum	156	17,8	
A0A0T6DHQ9	A0A0T6DHQ9_LACPN	Aldehyde-alcohol dehydrogenase	ASU25_01980	Lactobacillus plantarum	867	94,54	
A0A0M0CFN9	A0A0M0CFN9_LACPN	Alcohol dehydrogenase	ADS73_11475	Lactobacillus plantarum	342	36,087	
A0A0M0CCW1	A0A0M0CCW1_LACPN	Alcohol dehydrogenase	ADS73_14270	Lactobacillus plantarum	304	32,602	
A0A0M0CIR2	A0A0M0CIR2_LACPN	Acetaldehyde dehydrogenase	ADS73_04060	Lactobacillus plantarum	867	94,544	
A0A0T6DII6	A0A0T6DII6_LACPN	Sorbitol dehydrogenase	ASU25_03295	Lactobacillus plantarum	369	40,064	
A0A0F4LLP7	A0A0F4LLP7_9LACO	Aryl-alcohol dehydrogenase related enzyme	JF75_05150	Lactobacillus kimbladii	313	35,028	
A0A0M0CDY3	A0A0M0CDY3_LACPN	Aryl-alcohol dehydrogenase	ADS73_11680	Lactobacillus plantarum	373	40,062	
A0A0G9GRC8	A0A0G9GRC8_LACPN	Alcohol dehydrogenase (Fragment)	WP50_29040	Lactobacillus plantarum	128	13,957	
A0A0R2G7K6	A0A0R2G7K6_LACPN	Aldehyde-alcohol dehydrogenase	IV39_GL000229	Lactobacillus plantarum	890	97,31	
A0A0R2GFK8	A0A0R2GFK8_LACPN	Aryl-alcohol dehydrogenase family enzyme	IV39_GL000033	Lactobacillus plantarum	330	36,895	
A0A0G9GL00	A0A0G9GL00_LACPN	Alcohol dehydrogenase	WP50_29045	Lactobacillus plantarum	299	32,108	
A0A0G9GQD2	A0A0G9GQD2_LACPN	Aryl-alcohol dehydrogenase	WP50_15900	Lactobacillus plantarum	373	39,939	
A0A0G9GUX8	A0A0G9GUX8_LACPN	Alcohol dehydrogenase (Fragment)	WP50_07840	Lactobacillus plantarum	222	23,225	
A0A0M0CD07	A0A0M0CD07_LACPN	Alcohol dehydrogenase	ADS73_14565	Lactobacillus plantarum	325	34,14	
A0A0M0CGQ0	A0A0M0CGQ0_LACPN	Alcohol dehydrogenase	ADS73_09880	Lactobacillus plantarum	343	37,676	
A0A0R1ZUP6	A0A0R1ZUP6_9LACO	Aryl-alcohol dehydrogenase	FD44_GL000763	Lactobacillus malefermentans DSM 5705 = KCTC 3548	373	39,855	
A0A0R1ZPT0	A0A0R1ZPT0_9LACO	Alcohol dehydrogenase	FD44_GL001409	Lactobacillus malefermentans DSM 5705 = KCTC 3548	344	36,835	
A0A0R1ZUP1	A0A0R1ZUP1_9LACO	Benzyl alcohol dehydrogenase	FD44_GL000539	Lactobacillus malefermentans DSM 5705 = KCTC 3548	370	39,571	
A0A0R1WQN0	A0A0R1WQN0_9LACO	S-(Hydroxymethyl)glutathione dehydrogenase	FC40_GL000342	Lactobacillus hayakitensis DSM 18933 = JCM 14209	345	36,644	
A0A0R1ZQ53	A0A0R1ZQ53_9LACO	Ethanol-active dehydrogenase acetaldehyde-active reductase	FD44_GL001368	Lactobacillus malefermentans DSM 5705 = KCTC 3548	339	36,093	
A0A0R2A0H8	A0A0R2A0H8_9LACO	Alcohol dehydrogenase zinc-binding domain-containing protein	FD44_GL000944	Lactobacillus malefermentans DSM 5705 = KCTC 3548	323	34,527	
A0A0R2A5I9	A0A0R2A5I9_9LACO	Alcohol dehydrogenase	FD44_GL000482	Lactobacillus malefermentans DSM 5705 = KCTC 3548	340	36,15	
A0A0R1ZUQ3	A0A0R1ZUQ3_9LACO	Aryl-alcohol dehydrogenase related enzyme	FD44_GL000476	Lactobacillus malefermentans DSM 5705 = KCTC 3548	340	38,227	
A0A0R1WJ98	A0A0R1WJ98_9LACO	Short-chain alcohol dehydrogenase	FD31_GL001893	Lactobacillus nantensis DSM 16982	264	29,569	
A0A0R1ZYS4	A0A0R1ZYS4_9LACO	Short-chain alcohol dehydrogenase	FD44_GL001827	Lactobacillus malefermentans DSM 5705 = KCTC 3548	253	27,122	
A0A0R1ZKU7	A0A0R1ZKU7_9LACO	Short-chain alcohol dehydrogenase	FD44_GL001876	Lactobacillus malefermentans DSM 5705 = KCTC 3548	253	26,391	
A0A0R1ZY41	A0A0R1ZY41_9LACO	Short-chain alcohol dehydrogenase	FD44_GL000148	Lactobacillus malefermentans DSM 5705 = KCTC 3548	285	30,481	
A0A0R1ZUM1	A0A0R1ZUM1_9LACO	Alcohol dehydrogenase zinc-binding domain-containing protein	FD44_GL000758	Lactobacillus malefermentans DSM 5705 = KCTC 3548	307	32,953	
A0A0R1ZV54	A0A0R1ZV54_9LACO	Alcohol dehydrogenase GroES domain-containing protein	FD44_GL000296	Lactobacillus malefermentans DSM 5705 = KCTC 3548	318	34,592	
A0A0R1WIE1	A0A0R1WIE1_9LACO	Short-chain alcohol dehydrogenase	FD31_GL000245	Lactobacillus nantensis DSM 16982	234	25,343	
A0A0R1ZSS6	A0A0R1ZSS6_9LACO	Aryl-alcohol dehydrogenase related enzyme	FD44_GL001749	Lactobacillus malefermentans DSM 5705 = KCTC 3548	327	35,674	
A0A0R1ZQP8	A0A0R1ZQP8_9LACO	Benzyl alcohol dehydrogenase	FD44_GL001623	Lactobacillus malefermentans DSM 5705 = KCTC 3548	369	38,989	
A0A0R2A6A2	A0A0R2A6A2_9LACO	Zinc-binding alcohol dehydrogenase family protein	FD44_GL000491	Lactobacillus malefermentans DSM 5705 = KCTC 3548	351	37,743	
A0A0R1WPV7	A0A0R1WPV7_9LACO	Alcohol dehydrogenase	FD31_GL002305	Lactobacillus nantensis DSM 16982	345	36,844	
A0A0R1WIZ7	A0A0R1WIZ7_9LACO	Alcohol dehydrogenase	FD31_GL001468	Lactobacillus nantensis DSM 16982	347	36,86	
A0A0R1WGZ4	A0A0R1WGZ4_9LACO	NADPH-quinone alcohol dehydrogenase, Zn-dependent	FD31_GL000381	Lactobacillus nantensis DSM 16982	333	36,95	
G3YZW9	G3YZW9_9LACO	Aldehyde-alcohol dehydrogenase	HMPREF1027_01065	Lactobacillus sp. 7_1_47FAA	864	94,889	
A0A0R1WMD8	A0A0R1WMD8_9LACO	Dehydrogenase	FD31_GL000135	Lactobacillus nantensis DSM 16982	350	38,177	
A0A0R1WKU3	A0A0R1WKU3_9LACO	Aryl-alcohol dehydrogenase	FD31_GL000969	Lactobacillus nantensis DSM 16982	373	39,838	
A0A0R1WKQ2	A0A0R1WKQ2_9LACO	Alcohol dehydrogenase zinc-binding domain-containing protein	FD31_GL000494	Lactobacillus nantensis DSM 16982	317	33,393	
A0A0R2KKA7	A0A0R2KKA7_9LACO	Aryl-alcohol dehydrogenase-like protein	IV53_GL001133	Lactobacillus ceti DSM 22408	329	37,327	
A0A0L0TGN7	A0A0L0TGN7_9LACO	Molecular chaperone GroES	LDS38_07070	Lactobacillus delbrueckii subsp. sunkii	344	36,631	
A0A089XZ11	A0A089XZ11_9LACO	Galactitol-1-phosphate 5-dehydrogenase (EC 1.1.1.251)	LACWKB8_0203	Lactobacillus sp. wkB8	344	36,823	
A0A089Y4C3	A0A089Y4C3_9LACO	Alcohol dehydrogenase (EC 1.1.1.1)	LACWKB8_0058	Lactobacillus sp. wkB8	384	41,6	
A0A089Y4D1	A0A089Y4D1_9LACO	Galactitol-1-phosphate 5-dehydrogenase (EC 1.1.1.251)	LACWKB8_0068	Lactobacillus sp. wkB8	350	39,052	
A0A0R1YAE1	A0A0R1YAE1_9LACO	Alcohol dehydrogenase	FC33_GL000960	Lactobacillus aviarius subsp. aviarius DSM 20655	336	35,762	
J9VY06	J9VY06_LACBU	Short-chain alcohol dehydrogenase (EC 1.1.1.100)	fabg1 LBUCD034_0035	Lactobacillus buchneri CD034	255	26,664	
V6DKU3	V6DKU3_9LACO	Galactitol-1-phosphate 5-dehydrogenase (EC 1.1.1.251)	LSCP400_11731	Lactobacillus salivarius cp400	357	38,789	
J9W4C4	J9W4C4_LACBU	Alcohol dehydrogenase (EC 1.1.1.1)	adh2 LBUCD034_1453	Lactobacillus buchneri CD034	358	39,01	
C2KB41	C2KB41_9LACO	Alcohol dehydrogenase, iron-dependent (EC 1.1.1.1)	adhE HMPREF0506_0044	Lactobacillus crispatus JV-V01	426	47,295	
J9WAJ6	J9WAJ6_LACBU	Putative (R,R)-butanediol dehydrogenase (EC 1.1.1.-)	LBUCD034_2098	Lactobacillus buchneri CD034	356	38,589	
J9W2K2	J9W2K2_LACBU	Zn-dependent benzyl alcohol dehydrogenase (EC 1.1.1.90)	adh1 LBUCD034_0155	Lactobacillus buchneri CD034	364	38,814	
J9W5D6	J9W5D6_LACBU	Aryl-alcohol dehydrogenase related enzyme	LBUCD034_0357	Lactobacillus buchneri CD034	289	31,927	
J9W5W9	J9W5W9_LACBU	Aryl-alcohol dehydrogenase (EC 1.1.1.90)	adhC LBUCD034_2003	Lactobacillus buchneri CD034	377	40,3	
V6DL82	V6DL82_9LACO	Alcohol dehydrogenase (EC 1.1.1.1)	LSCP400_12381	Lactobacillus salivarius cp400	346	36,839	
J9WC08	J9WC08_LACBU	Mannitol dehydrogenase (EC 1.1.1.67)	mdh LBUCD034_p0049	Lactobacillus buchneri CD034	333	35,831	
J9W6U8	J9W6U8_LACBU	Aryl-alcohol dehydrogenase (EC 1.1.1.90)	LBUCD034_0872	Lactobacillus buchneri CD034	373	39,893	
C2KB42	C2KB42_9LACO	Alcohol dehydrogenase, iron-dependent (EC 1.1.1.1)	HMPREF0506_0045	Lactobacillus crispatus JV-V01	179	19,647	
C2KCM0	C2KCM0_9LACO	GroES-like protein (EC 1.1.1.1)	adh2 HMPREF0506_0595	Lactobacillus crispatus JV-V01	303	32,353	
V6DL16	V6DL16_9LACO	Galactitol-1-phosphate 5-dehydrogenase (EC 1.1.1.251)	LSCP400_11721	Lactobacillus salivarius cp400	349	38,176	
J9W6W0	J9W6W0_LACBU	Putative mannitol-2-dehydrogenase (EC 1.1.1.67)	LBUCD034_2338	Lactobacillus buchneri CD034	333	35,937	
V6DLS8	V6DLS8_9LACO	Aryl-alcohol dehydrogenase (EC 1.1.1.90)	adhC LSCP400_14251	Lactobacillus salivarius cp400	373	40,175	
C2KB40	C2KB40_9LACO	Aldehyde-alcohol dehydrogenase	adhE HMPREF0506_0043	Lactobacillus crispatus JV-V01	285	31,114	
J9W1V0	J9W1V0_LACBU	Alcohol dehydrogenase (EC 1.1.1.1)	adhA LBUCD034_1321	Lactobacillus buchneri CD034	338	36,186	
J9W3E5	J9W3E5_LACBU	Alcohol dehydrogenase (EC 1.1.1.1)	adh3 LBUCD034_1878	Lactobacillus buchneri CD034	347	36,831	
V6DQ91	V6DQ91_9LACO	Bifunctional protein: zinc-containing alcohol dehydrogenase quinone oxidoreductase ( NADPH:quinone reductase) Similar to arginate lyase (EC 1.1.1.-)	LSCP400_20361	Lactobacillus salivarius cp400	334	36,606	
J9VXY7	J9VXY7_LACBU	Aryl-alcohol dehydrogenase related enzyme	LBUCD034_0194	Lactobacillus buchneri CD034	302	33,184	
A0A0R2LUU6	A0A0R2LUU6_9LACO	Short-chain alcohol dehydrogenase	IV54_GL001828	Lactobacillus paucivorans	252	26,63	
A0A0R2LSY6	A0A0R2LSY6_9LACO	Threonine dehydrogenase related Zn-dependent dehydrogenase	IV54_GL000894	Lactobacillus paucivorans	333	35,507	
D0DUV3	D0DUV3_LACFE	NADP-dependent alcohol dehydrogenase (EC 1.1.1.2)	aDH HMPREF0513_01442	Lactobacillus fermentum 28-3-CHN	356	37,952	
D0DTB7	D0DTB7_LACFE	GroES-like protein	HMPREF0513_00906	Lactobacillus fermentum 28-3-CHN	205	22,071	
A0A0R2LUE1	A0A0R2LUE1_9LACO	Alcohol dehydrogenase GroES domain protein	IV54_GL000849	Lactobacillus paucivorans	335	35,881	
D0DR67	D0DR67_LACFE	Putative chlorophyll synthesis pathway protein BchC	HMPREF0513_00081	Lactobacillus fermentum 28-3-CHN	350	37,209	
A0A098R7L6	A0A098R7L6_9LACO	Sorbitol dehydrogenase	HR47_10935	Lactobacillus paraplantarum	352	38,17	
A0A0R2M268	A0A0R2M268_9LACO	Aldehyde-alcohol dehydrogenase	IV54_GL000740	Lactobacillus paucivorans	871	94,931	
A0A0R2LRU1	A0A0R2LRU1_9LACO	Alcohol dehydrogenase	IV54_GL001432	Lactobacillus paucivorans	338	36,149	
D0DRM9	D0DRM9_LACFE	GroES-like protein	HMPREF0513_00243	Lactobacillus fermentum 28-3-CHN	143	15,503	
A0A0R2LT44	A0A0R2LT44_9LACO	Threonine dehydrogenase related Zn-dependent dehydrogenase	IV54_GL000839	Lactobacillus paucivorans	340	36,16	
A0A0R2LU24	A0A0R2LU24_9LACO	Alcohol dehydrogenase, iron-dependent	IV54_GL000902	Lactobacillus paucivorans	389	41,609	
D0DSW1	D0DSW1_LACFE	Alcohol dehydrogenase, propanol-preferring (EC 1.1.1.1)	adhP HMPREF0513_00750	Lactobacillus fermentum 28-3-CHN	339	35,783	
A0A0R2LW64	A0A0R2LW64_9LACO	Alcohol dehydrogenase	IV54_GL002091	Lactobacillus paucivorans	329	34,23	
D0DSR3	D0DSR3_LACFE	Zinc-binding alcohol dehydrogenase family protein (EC 1.-.-.-)	HMPREF0513_00702	Lactobacillus fermentum 28-3-CHN	347	37,083	
A0A098R6L9	A0A098R6L9_9LACO	Alcohol dehydrogenase	HR47_06245	Lactobacillus paraplantarum	163	18,545	
A0A0R2LR03	A0A0R2LR03_9LACO	Zn-dependent alcohol dehydrogenase	IV54_GL001588	Lactobacillus paucivorans	374	39,698	
D0DR27	D0DR27_LACFE	NADP-dependent alcohol dehydrogenase (EC 1.1.1.2)	aDH HMPREF0513_00041	Lactobacillus fermentum 28-3-CHN	356	37,842	
D0DVL1	D0DVL1_LACFE	GroES-like protein	HMPREF0513_01700	Lactobacillus fermentum 28-3-CHN	346	36,799	
D0DS93	D0DS93_LACFE	Putative chlorophyll synthesis pathway protein BchC	HMPREF0513_00532	Lactobacillus fermentum 28-3-CHN	336	35,835	
A0A0P6UDT0	A0A0P6UDT0_STRTR	23-butanediol dehydrogenase S-alcohol forming (R)-acetoin-specific / Acetoin (Diacetyl) reductase	ADU38_1579	Streptococcus thermophilus	141	15,353	
A0A0P6V111	A0A0P6V111_STRTR	23-butanediol dehydrogenase S-alcohol forming (R)-acetoin-specific / Acetoin (Diacetyl) reductase	ADU38_1580	Streptococcus thermophilus	91	9,748	
A0A0R2ARY5	A0A0R2ARY5_9LACO	Sorbitol dehydrogenase	FD06_GL000623	Lactobacillus ozensis DSM 23829 = JCM 17196	333	35,699	
A0A0R2AMM6	A0A0R2AMM6_9LACO	Alcohol dehydrogenase GroES domain-containing protein	FD06_GL000231	Lactobacillus ozensis DSM 23829 = JCM 17196	338	35,923	
A0A0R2AMP6	A0A0R2AMP6_9LACO	NADH-dependent (S)-specific alcohol dehydrogenase	FD06_GL000323	Lactobacillus ozensis DSM 23829 = JCM 17196	362	38,757	
A0A0R2AZ87	A0A0R2AZ87_9LACO	Aldehyde-alcohol dehydrogenase	FD06_GL000931	Lactobacillus ozensis DSM 23829 = JCM 17196	877	96,252	
C0WZX7	C0WZX7_LACFE	NADP-dependent alcohol dehydrogenase (EC 1.1.1.2)	aDH HMPREF0511_1678	Lactobacillus fermentum ATCC 14931	356	37,844	
C0WYJ3	C0WYJ3_LACFE	NADP-dependent alcohol dehydrogenase (EC 1.1.1.2)	aDH HMPREF0511_1194	Lactobacillus fermentum ATCC 14931	356	37,943	
A0A0P6UJA1	A0A0P6UJA1_STRTR	Alcohol dehydrogenase Acetaldehyde dehydrogenase	ADU38_1914	Streptococcus thermophilus	66	7,506	
C0WYK1	C0WYK1_LACFE	GroES-like protein (EC 1.1.1.90)	xylB HMPREF0511_1202	Lactobacillus fermentum ATCC 14931	373	39,77	
A0A0P6UXH0	A0A0P6UXH0_STRTR	Alcohol dehydrogenase Acetaldehyde dehydrogenase	ADU38_1913	Streptococcus thermophilus	112	12,752	
A0A0R1TXJ5	A0A0R1TXJ5_9LACO	Alcohol dehydrogenase	FC50_GL001356	Lactobacillus pantheris DSM 15945 = JCM 12539 = NBRC 106106	327	34,581	
A0A0P6UYB8	A0A0P6UYB8_STRTR	Alcohol dehydrogenase	ADU38_1558	Streptococcus thermophilus	72	7,821	
A0A0R1TUF1	A0A0R1TUF1_9LACO	Aryl-alcohol dehydrogenase	FC50_GL001926	Lactobacillus pantheris DSM 15945 = JCM 12539 = NBRC 106106	366	39,142	
C0WVR8	C0WVR8_LACFE	Putative chlorophyll synthesis pathway protein BchC (EC 1.1.1.103)	tdh HMPREF0511_0219	Lactobacillus fermentum ATCC 14931	356	38,341	
C0WXF8	C0WXF8_LACFE	Alcohol dehydrogenase, iron-dependent (EC 1.1.1.1)	dhaT HMPREF0511_0809	Lactobacillus fermentum ATCC 14931	403	43,693	
A0A0P6V044	A0A0P6V044_STRTR	Alcohol dehydrogenase Acetaldehyde dehydrogenase	ADU38_1916	Streptococcus thermophilus	275	30,224	
A0A0P6UFF9	A0A0P6UFF9_STRTR	Alcohol dehydrogenase	ADU38_1556	Streptococcus thermophilus	114	12,58	
A0A0R1U7X2	A0A0R1U7X2_9LACO	Alcohol dehydrogenase GroES domain-containing protein	FC50_GL001349	Lactobacillus pantheris DSM 15945 = JCM 12539 = NBRC 106106	321	34,731	
C0WWA3	C0WWA3_LACFE	GroES-like protein	HMPREF0511_0404	Lactobacillus fermentum ATCC 14931	346	36,73	
C0WZJ1	C0WZJ1_LACFE	Zinc-binding alcohol dehydrogenase family protein (EC 1.-.-.-)	adh HMPREF0511_1542	Lactobacillus fermentum ATCC 14931	336	35,9	
C0WZP3	C0WZP3_LACFE	GroES-like protein (EC 1.1.1.1)	adhA HMPREF0511_1594	Lactobacillus fermentum ATCC 14931	352	37,34	
A0A0R1U0J6	A0A0R1U0J6_9LACO	Aryl-alcohol dehydrogenase related enzyme	FC50_GL000136	Lactobacillus pantheris DSM 15945 = JCM 12539 = NBRC 106106	280	30,814	
A0A0P6UD01	A0A0P6UD01_STRTR	Alcohol dehydrogenase Acetaldehyde dehydrogenase	ADU38_1915	Streptococcus thermophilus	148	16,532	
C0WXM8	C0WXM8_LACFE	Alcohol dehydrogenase, iron-dependent (EC 1.1.1.1)	gldA HMPREF0511_0879	Lactobacillus fermentum ATCC 14931	363	38,614	
A0A0P6UME1	A0A0P6UME1_STRTR	Alcohol dehydrogenase	ADU38_1557	Streptococcus thermophilus	49	5,351	
A0A0R1U2T7	A0A0R1U2T7_9LACO	Alcohol dehydrogenase	FC50_GL002202	Lactobacillus pantheris DSM 15945 = JCM 12539 = NBRC 106106	340	35,666	
S2S281	S2S281_LACPA	Short-chain alcohol dehydrogenase	Lpp41_06440	Lactobacillus paracasei subsp. paracasei Lpp41	277	30,198	
S2R5N4	S2R5N4_LACPA	Short-chain alcohol dehydrogenase	Lpp41_08834	Lactobacillus paracasei subsp. paracasei Lpp41	311	34,071	
S2RKX4	S2RKX4_LACPA	Alcohol dehydrogenase	Lpp41_10004	Lactobacillus paracasei subsp. paracasei Lpp41	346	36,791	
S2R7Y8	S2R7Y8_LACPA	Bifunctional acetaldehyde-CoA/alcohol dehydrogenase (Fragment)	Lpp41_07287	Lactobacillus paracasei subsp. paracasei Lpp41	234	25,847	
S2RAW4	S2RAW4_LACPA	Aryl-alcohol dehydrogenase-like protein	Lpp41_02954	Lactobacillus paracasei subsp. paracasei Lpp41	334	37,067	
K0NWD3	K0NWD3_9LACO	Aldehyde-alcohol dehydrogenase 2 domain protein	FC20_GL001460	Lactobacillus equicursoris DSM 19284 = JCM 14600 = CIP 110162	457	49,369	
K0NXY2	K0NXY2_9LACO	GroES-like protein	FC20_GL001765	Lactobacillus equicursoris DSM 19284 = JCM 14600 = CIP 110162	347	36,704	
S2R8F9	S2R8F9_LACPA	Alcohol-acetaldehyde dehydrogenase	Lpp41_06575	Lactobacillus paracasei subsp. paracasei Lpp41	397	43,137	
S2RGN5	S2RGN5_LACPA	Medium chain dehydrogenases/reductase (MDR)/zinc-dependent alcohol dehydrogenase-like family protein (Fragment)	Lpp41_00075	Lactobacillus paracasei subsp. paracasei Lpp41	30	3,237	
A0A0R1VM75	A0A0R1VM75_9LACO	Alcohol dehydrogenase, zinc-binding protein	FC89_GL000574	Lactobacillus ghanensis DSM 18630	340	37,601	
A0A0R1VJ74	A0A0R1VJ74_9LACO	Aryl-alcohol dehydrogenase related enzyme	FC89_GL001294	Lactobacillus ghanensis DSM 18630	304	33,647	
A0A0R1VL66	A0A0R1VL66_9LACO	Alcohol dehydrogenase	FC89_GL000912	Lactobacillus ghanensis DSM 18630	337	37,476	
A0A0R1VQT6	A0A0R1VQT6_9LACO	Aryl-alcohol dehydrogenase	FC89_GL001107	Lactobacillus ghanensis DSM 18630	372	39,717	
A0A0R1VPR6	A0A0R1VPR6_9LACO	Alcohol dehydrogenase, zinc-binding protein	FC89_GL001690	Lactobacillus ghanensis DSM 18630	345	37,835	
A0A0R1VT85	A0A0R1VT85_9LACO	L-iditol 2-dehydrogenase	FC89_GL000999	Lactobacillus ghanensis DSM 18630	368	39,859	
H1LEN1	H1LEN1_9LACO	Zinc-binding alcohol dehydrogenase family protein	HMPREF9104_01057	Lactobacillus kisonensis F0435	368	40,118	
H1LFV3	H1LFV3_9LACO	GroES-like protein	HMPREF9104_01479	Lactobacillus kisonensis F0435	346	36,755	
H1LHZ7	H1LHZ7_9LACO	Zinc-binding alcohol dehydrogenase family protein	HMPREF9104_02238	Lactobacillus kisonensis F0435	340	37,484	
H1LGI7	H1LGI7_9LACO	Alcohol dehydrogenase, propanol-preferring	HMPREF9104_01715	Lactobacillus kisonensis F0435	338	36,157	
H1LHW2	H1LHW2_9LACO	Putative chlorophyll synthesis pathway protein BchC	HMPREF9104_02203	Lactobacillus kisonensis F0435	334	36,058	
H1LF51	H1LF51_9LACO	Alcohol dehydrogenase, iron-dependent	HMPREF9104_01227	Lactobacillus kisonensis F0435	395	42,879	
H1LD34	H1LD34_9LACO	Putative benzyl alcohol dehydrogenase AreB	HMPREF9104_00498	Lactobacillus kisonensis F0435	388	41,582	
H1LI48	H1LI48_9LACO	Alcohol dehydrogenase, iron-dependent	HMPREF9104_02289	Lactobacillus kisonensis F0435	159	17,251	
H1LHN8	H1LHN8_9LACO	GroES-like protein	HMPREF9104_02129	Lactobacillus kisonensis F0435	340	37,985	
A0A0R2NTB2	A0A0R2NTB2_9LACO	Short-chain alcohol dehydrogenase	DY78_GL002628	Lactobacillus fabifermentans DSM 21115	243	25,527	
V4X0H1	V4X0H1_LACFE	2,3-butanediol dehydrogenase	NB22_06575	Lactobacillus fermentum NB-22	350	37,225	
V4XM59	V4XM59_LACFE	Alcohol dehydrogenase	NB22_06365	Lactobacillus fermentum NB-22	356	37,939	
V4ZGJ8	V4ZGJ8_LACFE	Alcohol dehydrogenase	NB22_05605	Lactobacillus fermentum NB-22	339	35,783	
A0A0R1QI37	A0A0R1QI37_9LACO	Aryl-alcohol dehydrogenase	FD45_GL000686	Lactobacillus nagelii DSM 13675	372	39,74	
A0A0R1QBC6	A0A0R1QBC6_9LACO	L-iditol 2-dehydrogenase	FD45_GL000740	Lactobacillus nagelii DSM 13675	356	38,447	
A0A0R1Q9Z1	A0A0R1Q9Z1_9LACO	Threonine dehydrogenase or related Zn-dependent dehydrogenase	FD45_GL001743	Lactobacillus nagelii DSM 13675	359	38,065	
A0A0R1QDF3	A0A0R1QDF3_9LACO	Aryl-alcohol dehydrogenase related enzyme	FD45_GL002339	Lactobacillus nagelii DSM 13675	304	33,854	
V4XPH4	V4XPH4_LACFE	Alcohol dehydrogenase	NB22_09105	Lactobacillus fermentum NB-22	347	37,083	
A0A0R2NIH6	A0A0R2NIH6_9LACO	Alcohol dehydrogenase	DY78_GL001295	Lactobacillus fabifermentans DSM 21115	329	34,271	
A0A0R2NVX3	A0A0R2NVX3_9LACO	Threonine dehydrogenase related Zn-dependent dehydrogenase	DY78_GL002750	Lactobacillus fabifermentans DSM 21115	346	36,669	
V4XUS3	V4XUS3_LACFE	Alcohol dehydrogenase	NB22_00310	Lactobacillus fermentum NB-22	336	35,849	
A0A0R2NUX2	A0A0R2NUX2_9LACO	Aryl-alcohol dehydrogenase family enzyme	DY78_GL002769	Lactobacillus fabifermentans DSM 21115	312	34,456	
A0A0R2NN82	A0A0R2NN82_9LACO	Alcohol dehydrogenase	DY78_GL000279	Lactobacillus fabifermentans DSM 21115	353	37,813	
A0A0R1QHJ1	A0A0R1QHJ1_9LACO	Iron-containing alcohol dehydrogenase	FD45_GL002172	Lactobacillus nagelii DSM 13675	385	41,364	
A0A0R1QB31	A0A0R1QB31_9LACO	Aryl-alcohol dehydrogenase	FD45_GL000641	Lactobacillus nagelii DSM 13675	375	40,41	
A0A0R1Q7E5	A0A0R1Q7E5_9LACO	Alcohol dehydrogenase, zinc-binding protein	FD45_GL001880	Lactobacillus nagelii DSM 13675	340	37,33	
S2SCB8	S2SCB8_LACPA	Short-chain alcohol dehydrogenase	Lpp43_06559	Lactobacillus paracasei subsp. paracasei Lpp43	277	30,196	
S2SEP1	S2SEP1_LACPA	Short-chain alcohol dehydrogenase	Lpp43_04176	Lactobacillus paracasei subsp. paracasei Lpp43	247	26,809	
S2SUD5	S2SUD5_LACPA	Short-chain alcohol dehydrogenase	Lpp43_06304	Lactobacillus paracasei subsp. paracasei Lpp43	311	34,058	
S2S5C5	S2S5C5_LACPA	Alcohol-acetaldehyde dehydrogenase	Lpp43_13971	Lactobacillus paracasei subsp. paracasei Lpp43	397	43,179	
S2S4L5	S2S4L5_LACPA	Zinc-containing alcohol dehydrogenase superfamily protein	Lpp43_14947	Lactobacillus paracasei subsp. paracasei Lpp43	58	6,311	
S2SVW0	S2SVW0_LACPA	PTS system, mannitol-specific IIC component	Lpp43_03641	Lactobacillus paracasei subsp. paracasei Lpp43	350	38,227	
S2SWG1	S2SWG1_LACPA	Zinc-type alcohol dehydrogenase-like protein	Lpp43_02522	Lactobacillus paracasei subsp. paracasei Lpp43	340	36,17	
S2S646	S2S646_LACPA	Putative zinc-type alcohol dehydrogenase-like protein AdhB	Lpp43_12816	Lactobacillus paracasei subsp. paracasei Lpp43	346	36,893	
S2SVY0	S2SVY0_LACPA	Oxidoreductase, zinc-binding dehydrogenase family protein	Lpp43_03741	Lactobacillus paracasei subsp. paracasei Lpp43	347	38,352	
W9EMM8	W9EMM8_9LACO	2, 3-butanediol dehydrogenase, S-alcohol forming, (R)-acetoin-specific	B808_174	Lactobacillus florum 8D	257	27,272	
I8R3S7	I8R3S7_LACPE	Aryl-alcohol dehydrogenase	KCA1_2501	Lactobacillus pentosus KCA1	373	39,948	
I9KXV2	I9KXV2_LACPE	Alcohol dehydrogenase	KCA1_2586	Lactobacillus pentosus KCA1	348	37,581	
W9EDE1	W9EDE1_9LACO	Sorbitol dehydrogenase	B808_996	Lactobacillus florum 8D	341	37,165	
I8R7E2	I8R7E2_LACPE	Alcohol dehydrogenase, MDR family	KCA1_2909	Lactobacillus pentosus KCA1	338	36,657	
I9L4M6	I9L4M6_LACPE	Medium chain dehydrogenases/reductase (MDR)/zinc-dependent alcohol dehydrogenase-like family protein	KCA1_0104	Lactobacillus pentosus KCA1	344	37,695	
I9L4A0	I9L4A0_LACPE	Medium chain dehydrogenases/reductase (MDR)/zinc-dependent alcohol dehydrogenase-like family protein	KCA1_0097	Lactobacillus pentosus KCA1	323	34,174	
I8R9Z4	I8R9Z4_LACPE	Alcohol dehydrogenase (EC 1.1.1.1)	adh2 KCA1_1577	Lactobacillus pentosus KCA1	346	37,042	
I8RA79	I8RA79_LACPE	Alcohol dehydrogenase (EC 1.1.1.1)	adh1 KCA1_1420	Lactobacillus pentosus KCA1	347	36,778	
A0A0R1PAT2	A0A0R1PAT2_9LACO	Aryl-alcohol dehydrogenase	FC37_GL001332	Lactobacillus gallinarum DSM 10532 = JCM 2011	240	25,896	
I9AQL5	I9AQL5_LACPE	Medium chain dehydrogenases/reductase (MDR)/zinc-dependent alcohol dehydrogenase-like family protein	KCA1_0171	Lactobacillus pentosus KCA1	304	32,467	
A0A0R1NIS6	A0A0R1NIS6_9LACO	L-threonine 3-dehydrogenase	FC37_GL000241	Lactobacillus gallinarum DSM 10532 = JCM 2011	343	37,472	
I8RCK0	I8RCK0_LACPE	Alcohol dehydrogenase , Acetaldehyde dehydrogenase (EC 1.1.1.1) (EC 1.2.1.10)	acdH KCA1_0299	Lactobacillus pentosus KCA1	456	48,733	
I9KZR3	I9KZR3_LACPE	Bifunctional protein: zinc-containing alcohol dehydrogenase, quinone oxidoreductase (NADPH:quinone reductase) (EC 1.1.1.-)	KCA1_1985	Lactobacillus pentosus KCA1	342	36,19	
I8R8W0	I8R8W0_LACPE	Medium chain dehydrogenases/reductase (MDR)/zinc-dependent alcohol dehydrogenase-like family protein	KCA1_0071	Lactobacillus pentosus KCA1	341	36,689	
W9ELM5	W9ELM5_9LACO	Alcohol dehydrogenase	B808_480	Lactobacillus florum 8D	349	37,502	
I9L0P8	I9L0P8_LACPE	Bifunctional protein: zinc-containing alcohol dehydrogenase, quinone oxidoreductase (NADPH:quinone reductase) (EC 1.1.1.-)	KCA1_1670	Lactobacillus pentosus KCA1	314	33,666	
W9EF68	W9EF68_9LACO	Zinc-containing alcohol dehydrogenase, quinone oxidoreductase	B808_241	Lactobacillus florum 8D	338	36,526	
I8R833	I8R833_LACPE	Bifunctional protein: zinc-containing alcohol dehydrogenase, quinone oxidoreductase (NADPH:quinone reductase) (EC 1.1.1.-)	KCA1_2574	Lactobacillus pentosus KCA1	319	33,919	
A0A0R1ZRF9	A0A0R1ZRF9_9LACO	Alcohol dehydrogenase	FC18_GL000465	Lactobacillus sharpeae JCM 1186 = DSM 20505	363	38,734	
A0A0R1ZMF5	A0A0R1ZMF5_9LACO	Alcohol dehydrogenase	FC18_GL000192	Lactobacillus sharpeae JCM 1186 = DSM 20505	337	36,153	
D5H111	D5H111_LACCS	Alcohol dehydrogenase, zinc-binding	LCRIS_00249	Lactobacillus crispatus (strain ST1)	340	38,23	
A0A081BHL4	A0A081BHL4_9LACO	Short-chain alcohol dehydrogenase	LOSG293_080180	Lactobacillus oryzae JCM 18671	252	27,074	
A0A081BHK6	A0A081BHK6_9LACO	Putative aryl-alcohol dehydrogenase	LOSG293_080100	Lactobacillus oryzae JCM 18671	177	19,303	
A0A0E2BUF1	A0A0E2BUF1_LACCA	Short-chain alcohol dehydrogenase (EC 1.-.-.-) (EC 1.1.1.125)	LCAA2362_0853	Lactobacillus casei A2-362	274	29,793	
A0A081BK73	A0A081BK73_9LACO	Zinc-binding alcohol dehydrogenase	LOSG293_300120	Lactobacillus oryzae JCM 18671	339	36,39	
A0A0R1FFD5	A0A0R1FFD5_9LACO	Short-chain alcohol dehydrogenase	FD22_GL000732	Lactobacillus coryniformis subsp. coryniformis KCTC 3167 = DSM 20001	248	26,502	
A0A081BG09	A0A081BG09_9LACO	Alcohol dehydrogenase	LOSG293_010760	Lactobacillus oryzae JCM 18671	339	36,168	
A0A0E2BQF2	A0A0E2BQF2_LACCA	Short-chain alcohol dehydrogenase (EC 1.-.-.-)	LCAA2362_2717	Lactobacillus casei A2-362	237	24,351	
A0A081BJV8	A0A081BJV8_9LACO	Molecular chaperone GroES	LOSG293_250170	Lactobacillus oryzae JCM 18671	347	37,066	
A0A0E2BU35	A0A0E2BU35_LACCA	Short-chain alcohol dehydrogenase (EC 1.-.-.-)	LCAA2362_1091	Lactobacillus casei A2-362	277	30,196	
A0A081BHK2	A0A081BHK2_9LACO	Zinc-containing alcohol dehydrogenase	LOSG293_080060	Lactobacillus oryzae JCM 18671	53	5,943	
A0A081BKB1	A0A081BKB1_9LACO	Alcohol dehydrogenase	LOSG293_320120	Lactobacillus oryzae JCM 18671	386	41,996	
A0A081BJP4	A0A081BJP4_9LACO	Aryl-alcohol dehydrogenase related enzyme	LOSG293_230100	Lactobacillus oryzae JCM 18671	327	35,831	
A0A081BHK7	A0A081BHK7_9LACO	Putative aryl-alcohol dehydrogenase	LOSG293_080110	Lactobacillus oryzae JCM 18671	192	20,611	
A0A081BGG2	A0A081BGG2_9LACO	Alcohol dehydrogenase	LOSG293_020680	Lactobacillus oryzae JCM 18671	370	39,371	
A0A0R1F9P9	A0A0R1F9P9_9LACO	Short-chain alcohol dehydrogenase	FD22_GL000592	Lactobacillus coryniformis subsp. coryniformis KCTC 3167 = DSM 20001	239	25,181	
A0A081BHL9	A0A081BHL9_9LACO	Short-chain alcohol dehydrogenase	LOSG293_080230	Lactobacillus oryzae JCM 18671	253	26,665	
A0A0E2BN05	A0A0E2BN05_LACCA	Aryl-alcohol dehydrogenase-related enzyme	LCAA2362_2366	Lactobacillus casei A2-362	334	37,02	
A0A0R1EXI5	A0A0R1EXI5_9LACO	Alcohol dehydrogenase	FD22_GL000170	Lactobacillus coryniformis subsp. coryniformis KCTC 3167 = DSM 20001	249	26,546	
A0A0R1F3G3	A0A0R1F3G3_9LACO	Aryl-alcohol dehydrogenase	FD22_GL001299	Lactobacillus coryniformis subsp. coryniformis KCTC 3167 = DSM 20001	373	39,879	
A0A0E2BUJ4	A0A0E2BUJ4_LACCA	Zinc-containing alcohol dehydrogenase/quinone oxidoreductase [NADPH] (EC 1.-.-.-) (EC 1.1.1.-)	LCAA2362_2195	Lactobacillus casei A2-362	340	36,213	
A0A0R1EWX3	A0A0R1EWX3_9LACO	Aryl-alcohol dehydrogenase	FD22_GL000341	Lactobacillus coryniformis subsp. coryniformis KCTC 3167 = DSM 20001	373	39,747	
A0A0R1EYT0	A0A0R1EYT0_9LACO	Aryl-alcohol dehydrogenase	FD22_GL002282	Lactobacillus coryniformis subsp. coryniformis KCTC 3167 = DSM 20001	373	39,817	
A0A0E2BNT4	A0A0E2BNT4_LACCA	Alcohol dehydrogenase (EC 1.-.-.-) (EC 1.1.1.1)	LCAA2362_1464	Lactobacillus casei A2-362	346	36,884	
A0A0R1FEA2	A0A0R1FEA2_9LACO	Zinc-containing alcohol dehydrogenase (Oxidoreductase)	FD22_GL000931	Lactobacillus coryniformis subsp. coryniformis KCTC 3167 = DSM 20001	370	40,524	
A0A0E2BXJ0	A0A0E2BXJ0_LACCA	Zn-dependent dehydrogenase (EC 1.-.-.-)	LCAA2362_0453	Lactobacillus casei A2-362	360	38,823	
A0A0E2BM29	A0A0E2BM29_LACCA	Zinc-containing alcohol dehydrogenase/quinone oxidoreductase [NADPH] (EC 1.-.-.-) (EC 1.1.1.-)	LCAA2362_0539	Lactobacillus casei A2-362	345	37,631	
A0A0R1F591	A0A0R1F591_9LACO	Zinc-containing alcohol dehydrogenase	FD22_GL001058	Lactobacillus coryniformis subsp. coryniformis KCTC 3167 = DSM 20001	286	30,525	
A0A0R1F386	A0A0R1F386_9LACO	Zinc-containing alcohol dehydrogenase (Oxidoreductase)	FD22_GL001303	Lactobacillus coryniformis subsp. coryniformis KCTC 3167 = DSM 20001	329	35,415	
A0A0E2BQF4	A0A0E2BQF4_LACCA	Zinc-containing alcohol dehydrogenase/quinone oxidoreductase [NADPH] (EC 1.-.-.-) (EC 1.1.1.-)	LCAA2362_2823	Lactobacillus casei A2-362	322	34,667	
A0A0R1F1X3	A0A0R1F1X3_9LACO	Aryl-alcohol dehydrogenase related enzyme	FD22_GL001521	Lactobacillus coryniformis subsp. coryniformis KCTC 3167 = DSM 20001	279	30,818	
A0A0E2BTL6	A0A0E2BTL6_LACCA	Zinc-containing alcohol dehydrogenase/quinone oxidoreductase [NADPH] (EC 1.-.-.-) (EC 1.1.1.-)	LCAA2362_2132	Lactobacillus casei A2-362	302	31,3	
A0A0E2BME4	A0A0E2BME4_LACCA	Aryl-alcohol dehydrogenase-related enzyme	LCAA2362_0577	Lactobacillus casei A2-362	309	34,035	
A0A0R1FBB9	A0A0R1FBB9_9LACO	Alcohol dehydrogenase	FD22_GL002521	Lactobacillus coryniformis subsp. coryniformis KCTC 3167 = DSM 20001	331	35,295	
A0A0E2BUI1	A0A0E2BUI1_LACCA	Alcohol dehydrogenase (EC 1.-.-.-) (EC 1.1.1.1)	LCAA2362_2180	Lactobacillus casei A2-362	319	33,291	
A0A0R1FIB2	A0A0R1FIB2_9LACO	Dehydrogenase	FD22_GL001733	Lactobacillus coryniformis subsp. coryniformis KCTC 3167 = DSM 20001	318	34,605	
A0A0E2BRI3	A0A0E2BRI3_LACCA	Zinc-containing alcohol dehydrogenase/quinone oxidoreductase [NADPH] (EC 1.-.-.-) (EC 1.1.1.-)	LCAA2362_0222	Lactobacillus casei A2-362	165	18,196	
C4VNY0	C4VNY0_9LACO	Bifunctional acetaldehyde-CoA/alcohol dehydrogenase (EC 1.1.1.1) (EC 1.2.1.10)	LACJE0001_1304	Lactobacillus jensenii 269-3	100	11,174	
C4VMB3	C4VMB3_9LACO	GroES-like protein	LACJE0001_1614	Lactobacillus jensenii 269-3	344	37,123	
C4VKH2	C4VKH2_9LACO	Alcohol dehydrogenase, iron-dependent (EC 1.1.1.1) (Fragment)	LACJE0001_0086	Lactobacillus jensenii 269-3	767	83,904	
A0A0R2C584	A0A0R2C584_9LACO	Aryl-alcohol dehydrogenase related enzyme	FD19_GL001631	Lactobacillus thailandensis DSM 22698 = JCM 13996	282	31,254	
A0A0R2CGW4	A0A0R2CGW4_9LACO	Aryl-alcohol dehydrogenase	FD19_GL001395	Lactobacillus thailandensis DSM 22698 = JCM 13996	373	39,782	
A0A0R2CAD0	A0A0R2CAD0_9LACO	Alcohol dehydrogenase	FD19_GL001545	Lactobacillus thailandensis DSM 22698 = JCM 13996	345	36,765	
A0A0R2CEH4	A0A0R2CEH4_9LACO	Alcohol dehydrogenase	FD19_GL001632	Lactobacillus thailandensis DSM 22698 = JCM 13996	326	35,421	
S2SS13	S2SS13_LACPA	Short-chain alcohol dehydrogenase	Lpp49_03234	Lactobacillus paracasei subsp. paracasei Lpp49	277	30,196	
A0A0R2C4H7	A0A0R2C4H7_9LACO	Alcohol dehydrogenase	FD19_GL001800	Lactobacillus thailandensis DSM 22698 = JCM 13996	343	35,549	
F4FVV2	F4FVV2_LACBN	Alcohol dehydrogenase GroES domain protein	Lbuc_1196	Lactobacillus buchneri (strain NRRL B-30929)	338	36,186	
F4FWY6	F4FWY6_LACBN	Zinc-binding alcohol dehydrogenase family protein	Lbuc_1324	Lactobacillus buchneri (strain NRRL B-30929)	358	39,01	
F4FTM0	F4FTM0_LACBN	Aryl-alcohol dehydrogenase (EC 1.1.1.90)	Lbuc_0812	Lactobacillus buchneri (strain NRRL B-30929)	373	39,893	
F4FVW8	F4FVW8_LACBN	L-threonine 3-dehydrogenase (EC 1.1.1.103)	Lbuc_2235	Lactobacillus buchneri (strain NRRL B-30929)	333	35,936	
F4FWG8	F4FWG8_LACBN	Alcohol dehydrogenase zinc-binding domain protein	Lbuc_2310	Lactobacillus buchneri (strain NRRL B-30929)	304	32,501	
S2T7R5	S2T7R5_LACPA	Zinc-type alcohol dehydrogenase-like protein	Lpp49_03369	Lactobacillus paracasei subsp. paracasei Lpp49	340	37,336	
F4FTT0	F4FTT0_LACBN	Aryl-alcohol dehydrogenase (EC 1.1.1.90)	Lbuc_1914	Lactobacillus buchneri (strain NRRL B-30929)	377	40,3	
F4FSK1	F4FSK1_LACBN	Alcohol dehydrogenase zinc-binding domain protein	Lbuc_0639	Lactobacillus buchneri (strain NRRL B-30929)	323	35,179	
F4FW77	F4FW77_LACBN	Aryl-alcohol dehydrogenase (EC 1.1.1.90)	Lbuc_0112	Lactobacillus buchneri (strain NRRL B-30929)	364	38,445	
F4FVE1	F4FVE1_LACBN	Alcohol dehydrogenase zinc-binding domain protein	Lbuc_2192	Lactobacillus buchneri (strain NRRL B-30929)	307	32,483	
F4FTD4	F4FTD4_LACBN	Alcohol dehydrogenase GroES domain protein	Lbuc_1829	Lactobacillus buchneri (strain NRRL B-30929)	317	34,415	
F4FU96	F4FU96_LACBN	L-iditol 2-dehydrogenase (EC 1.1.1.14)	Lbuc_2009	Lactobacillus buchneri (strain NRRL B-30929)	356	38,588	
S2SMN4	S2SMN4_LACPA	Zinc-type alcohol dehydrogenase-like protein	Lpp49_04136	Lactobacillus paracasei subsp. paracasei Lpp49	340	36,223	
F4FT49	F4FT49_LACBN	Alcohol dehydrogenase (EC 1.1.1.1)	Lbuc_1794	Lactobacillus buchneri (strain NRRL B-30929)	347	36,831	
S2SNQ8	S2SNQ8_LACPA	Putative zinc-type alcohol dehydrogenase-like protein AdhB	Lpp49_02213	Lactobacillus paracasei subsp. paracasei Lpp49	346	36,948	
S2SQ06	S2SQ06_LACPA	PTS system mannitol-specific transporter subunit IIC	Lpp49_06542	Lactobacillus paracasei subsp. paracasei Lpp49	350	38,263	
S2SQ21	S2SQ21_LACPA	Oxidoreductase, zinc-binding dehydrogenase family protein	Lpp49_06642	Lactobacillus paracasei subsp. paracasei Lpp49	347	38,382	
D7V8A5	D7V8A5_LACPN	Aldehyde-alcohol dehydrogenase (EC 1.2.1.10)	adhE HMPREF0531_10382	Lactobacillus plantarum subsp. plantarum ATCC 14917 = JCM 1149 = CGMCC 1.2437	455	48,677	
D7V8T9	D7V8T9_LACPN	Zinc-binding alcohol dehydrogenase family protein (EC 1.1.1.1)	qor HMPREF0531_10562	Lactobacillus plantarum subsp. plantarum ATCC 14917 = JCM 1149 = CGMCC 1.2437	343	37,588	
D7V9K5	D7V9K5_LACPN	GroES-like protein (EC 1.1.1.1)	HMPREF0531_10828	Lactobacillus plantarum subsp. plantarum ATCC 14917 = JCM 1149 = CGMCC 1.2437	341	38,252	
D7VE84	D7VE84_LACPN	Aldehyde dehydrogenase (NAD) family protein (EC 1.2.1.-)	adhE HMPREF0531_12457	Lactobacillus plantarum subsp. plantarum ATCC 14917 = JCM 1149 = CGMCC 1.2437	890	97,325	
D7V9W7	D7V9W7_LACPN	Alcohol dehydrogenase, iron-dependent (EC 1.1.1.1)	dhaT HMPREF0531_10940	Lactobacillus plantarum subsp. plantarum ATCC 14917 = JCM 1149 = CGMCC 1.2437	148	16,183	
D7VD68	D7VD68_LACPN	GroES-like protein (EC 1.1.1.1)	adh2 HMPREF0531_12091	Lactobacillus plantarum subsp. plantarum ATCC 14917 = JCM 1149 = CGMCC 1.2437	346	36,692	
D7VF45	D7VF45_LACPN	GroES-like protein (EC 1.1.1.90)	adhC HMPREF0531_12768	Lactobacillus plantarum subsp. plantarum ATCC 14917 = JCM 1149 = CGMCC 1.2437	373	40,018	
D7VFX0	D7VFX0_LACPN	Zinc-binding alcohol dehydrogenase family protein (EC 1.1.1.1)	qor3 HMPREF0531_13043	Lactobacillus plantarum subsp. plantarum ATCC 14917 = JCM 1149 = CGMCC 1.2437	342	36,096	
D7V9W8	D7V9W8_LACPN	Alcohol dehydrogenase, iron-dependent (EC 1.1.1.1)	dhaT2 HMPREF0531_10941	Lactobacillus plantarum subsp. plantarum ATCC 14917 = JCM 1149 = CGMCC 1.2437	218	23,701	
D7V968	D7V968_LACPN	GroES-like protein (EC 1.1.1.1)	adh HMPREF0531_10691	Lactobacillus plantarum subsp. plantarum ATCC 14917 = JCM 1149 = CGMCC 1.2437	350	37,154	
A0A0R1I2I4	A0A0R1I2I4_9LACO	Short-chain alcohol dehydrogenase	FC97_GL000578	Lactobacillus paralimentarius DSM 13961 = JCM 10707	264	29,565	
A0A0R1I7L6	A0A0R1I7L6_9LACO	Short-chain alcohol dehydrogenase	FC97_GL000801	Lactobacillus paralimentarius DSM 13961 = JCM 10707	247	26,608	
A0A0R1HX91	A0A0R1HX91_9LACO	Short-chain alcohol dehydrogenase	FC97_GL001228	Lactobacillus paralimentarius DSM 13961 = JCM 10707	240	26,192	
A0A0R1HYL9	A0A0R1HYL9_9LACO	Aryl-alcohol dehydrogenase	FC97_GL001047	Lactobacillus paralimentarius DSM 13961 = JCM 10707	380	40,83	
A0A0R1IBD7	A0A0R1IBD7_9LACO	Alcohol dehydrogenase	FC97_GL001784	Lactobacillus paralimentarius DSM 13961 = JCM 10707	347	36,811	
A0A0R1I390	A0A0R1I390_9LACO	Alcohol dehydrogenase zinc-binding domain-containing protein	FC97_GL001536	Lactobacillus paralimentarius DSM 13961 = JCM 10707	317	33,329	
A0A0R1ICF9	A0A0R1ICF9_9LACO	Zinc-containing alcohol dehydrogenase superfamily protein	FC97_GL002091	Lactobacillus paralimentarius DSM 13961 = JCM 10707	317	35,167	
A0A0R1I983	A0A0R1I983_9LACO	Alcohol dehydrogenase	FC97_GL002101	Lactobacillus paralimentarius DSM 13961 = JCM 10707	345	36,745	
A0A0R1I2G0	A0A0R1I2G0_9LACO	Alcohol dehydrogenase, zinc-binding protein	FC97_GL000546	Lactobacillus paralimentarius DSM 13961 = JCM 10707	216	24,603	
U2W8D6	U2W8D6_LACPN	L-iditol 2-dehydrogenase	N644_0012	Lactobacillus plantarum AY01	369	40,091	
U2W7Y4	U2W7Y4_LACPN	Aryl-alcohol dehydrogenase	N644_0181	Lactobacillus plantarum AY01	373	39,96	
U2W3C6	U2W3C6_LACPN	Alcohol dehydrogenase	N644_1671	Lactobacillus plantarum AY01	347	36,794	
U2XRK3	U2XRK3_LACPN	Alcohol dehydrogenase	N644_0789	Lactobacillus plantarum AY01	314	33,203	
U2WNW2	U2WNW2_LACPN	Aryl-alcohol dehydrogenase family enzyme	N644_0696	Lactobacillus plantarum AY01	330	36,979	
U2WN57	U2WN57_LACPN	Alcohol dehydrogenase	N644_0971	Lactobacillus plantarum AY01	346	36,632	
E1QYI1	E1QYI1_OLSUV	Iron-containing alcohol dehydrogenase	Olsu_0321	Olsenella uli (strain ATCC 49627 / DSM 7084 / CIP 109912 / JCM 12494 / VPI D76D-27C) (Lactobacillus uli)	363	39,288	
E1QXC3	E1QXC3_OLSUV	Iron-containing alcohol dehydrogenase	Olsu_1686	Olsenella uli (strain ATCC 49627 / DSM 7084 / CIP 109912 / JCM 12494 / VPI D76D-27C) (Lactobacillus uli)	404	44,039	
E1QYZ8	E1QYZ8_OLSUV	Iron-containing alcohol dehydrogenase	Olsu_0497	Olsenella uli (strain ATCC 49627 / DSM 7084 / CIP 109912 / JCM 12494 / VPI D76D-27C) (Lactobacillus uli)	386	41,61	
E1QZH1	E1QZH1_OLSUV	Alcohol dehydrogenase zinc-binding domain protein	Olsu_0671	Olsenella uli (strain ATCC 49627 / DSM 7084 / CIP 109912 / JCM 12494 / VPI D76D-27C) (Lactobacillus uli)	347	37,777	
E1QZE2	E1QZE2_OLSUV	Iron-containing alcohol dehydrogenase	Olsu_0642	Olsenella uli (strain ATCC 49627 / DSM 7084 / CIP 109912 / JCM 12494 / VPI D76D-27C) (Lactobacillus uli)	401	42,891	
E1QYG5	E1QYG5_OLSUV	Aldehyde-alcohol dehydrogenase	Olsu_0305	Olsenella uli (strain ATCC 49627 / DSM 7084 / CIP 109912 / JCM 12494 / VPI D76D-27C) (Lactobacillus uli)	514	56,477	
E1QZH3	E1QZH3_OLSUV	Iron-containing alcohol dehydrogenase	Olsu_0673	Olsenella uli (strain ATCC 49627 / DSM 7084 / CIP 109912 / JCM 12494 / VPI D76D-27C) (Lactobacillus uli)	393	43,68	
E1QW49	E1QW49_OLSUV	Iron-containing alcohol dehydrogenase	Olsu_1246	Olsenella uli (strain ATCC 49627 / DSM 7084 / CIP 109912 / JCM 12494 / VPI D76D-27C) (Lactobacillus uli)	383	42,142	
B3XKW3	B3XKW3_LACRE	Alcohol dehydrogenase GroES domain protein	Lreu23DRAFT_4537	Lactobacillus reuteri 100-23	351	37,563	
B3XL91	B3XL91_LACRE	Alcohol dehydrogenase GroES domain protein	Lreu23DRAFT_4622	Lactobacillus reuteri 100-23	328	34,945	
B3XML6	B3XML6_LACRE	Alcohol dehydrogenase GroES domain protein	Lreu23DRAFT_4803	Lactobacillus reuteri 100-23	335	36,383	
E1QYF5	E1QYF5_OLSUV	Alcohol dehydrogenase zinc-binding domain protein (EC 1.1.1.2)	Olsu_0295	Olsenella uli (strain ATCC 49627 / DSM 7084 / CIP 109912 / JCM 12494 / VPI D76D-27C) (Lactobacillus uli)	352	37,411	
E1QW78	E1QW78_OLSUV	Alcohol dehydrogenase zinc-binding domain protein	Olsu_1275	Olsenella uli (strain ATCC 49627 / DSM 7084 / CIP 109912 / JCM 12494 / VPI D76D-27C) (Lactobacillus uli)	355	39,003	
E1QZV1	E1QZV1_OLSUV	Aldehyde-alcohol dehydrogenase	Olsu_0802	Olsenella uli (strain ATCC 49627 / DSM 7084 / CIP 109912 / JCM 12494 / VPI D76D-27C) (Lactobacillus uli)	873	95,946	
B3XPT8	B3XPT8_LACRE	Zinc-binding alcohol dehydrogenase family protein	Lreu23DRAFT_4458	Lactobacillus reuteri 100-23	348	37,904	
B3XMB3	B3XMB3_LACRE	Alcohol dehydrogenase GroES domain protein	Lreu23DRAFT_4757	Lactobacillus reuteri 100-23	336	35,976	
G2SM86	G2SM86_LACRR	Alcohol dehydrogenase	LRC_05610	Lactobacillus ruminis (strain ATCC 27782 / RF3)	346	36,899	
B3XM40	B3XM40_LACRE	Iron-containing alcohol dehydrogenase	Lreu23DRAFT_4735	Lactobacillus reuteri 100-23	373	40,619	
B3XMZ4	B3XMZ4_LACRE	Iron-containing alcohol dehydrogenase	Lreu23DRAFT_4884	Lactobacillus reuteri 100-23	390	42,195	
B3XPM3	B3XPM3_LACRE	Alcohol dehydrogenase GroES domain protein	Lreu23DRAFT_4420	Lactobacillus reuteri 100-23	342	36,144	
A0A0R2GS36	A0A0R2GS36_9LACO	Short-chain alcohol dehydrogenase	IV51_GL001130	Lactobacillus homohiochii	252	27,303	
A0A0R2GV87	A0A0R2GV87_9LACO	Threonine dehydrogenase related Zn-dependent dehydrogenase	IV51_GL000843	Lactobacillus homohiochii	340	37,367	
A0A0R2GGC6	A0A0R2GGC6_9LACO	Zinc-binding alcohol dehydrogenase family protein	IV51_GL000903	Lactobacillus homohiochii	351	38,218	
A0A0R2GM16	A0A0R2GM16_9LACO	Alcohol dehydrogenase, zinc-containing	IV51_GL000548	Lactobacillus homohiochii	338	37,394	
A0A0R2GIY0	A0A0R2GIY0_9LACO	Aldehyde-alcohol dehydrogenase	IV51_GL000497	Lactobacillus homohiochii	878	95,981	
A0A0R2GJX8	A0A0R2GJX8_9LACO	Alcohol dehydrogenase, zinc-binding protein	IV51_GL001116	Lactobacillus homohiochii	346	38,781	
A0A0R2GU83	A0A0R2GU83_9LACO	Sorbitol dehydrogenase	IV51_GL000168	Lactobacillus homohiochii	366	39,672	
A0A0R2GKY3	A0A0R2GKY3_9LACO	Threonine dehydrogenase related Zn-dependent dehydrogenase	IV51_GL000551	Lactobacillus homohiochii	341	37,373	
A0A0R2GUD2	A0A0R2GUD2_9LACO	Ethanol-active dehydrogenase acetaldehyde-active reductase	IV51_GL001068	Lactobacillus homohiochii	342	36,263	
A0A0R2GWJ6	A0A0R2GWJ6_9LACO	Alcohol dehydrogenase	IV51_GL000564	Lactobacillus homohiochii	347	37,331	
A0A0R2DU72	A0A0R2DU72_LACPA	Short-chain alcohol dehydrogenase	FC12_GL001977	Lactobacillus paracasei subsp. tolerans DSM 20258	299	32,518	
A0A0R1YUX2	A0A0R1YUX2_9LACO	Aryl-alcohol dehydrogenase related enzyme	FD40_GL000704	Lactobacillus amylophilus DSM 20533 = JCM 1125	104	12,247	
A0A0R1YN13	A0A0R1YN13_9LACO	Short-chain alcohol dehydrogenase	FD40_GL001563	Lactobacillus amylophilus DSM 20533 = JCM 1125	295	31,369	
A0A0R2DPJ2	A0A0R2DPJ2_LACPA	Short-chain alcohol dehydrogenase	FC12_GL001619	Lactobacillus paracasei subsp. tolerans DSM 20258	277	30,164	
A0A0R1YK88	A0A0R1YK88_9LACO	Alcohol dehydrogenase	FD40_GL000706	Lactobacillus amylophilus DSM 20533 = JCM 1125	344	36,551	
C2FBU8	C2FBU8_LACPA	GroES-like protein (EC 1.1.1.1)	adh2 HMPREF0530_1056	Lactobacillus paracasei subsp. paracasei ATCC 25302	346	36,923	
C2FAB6	C2FAB6_LACPA	Zinc-binding alcohol dehydrogenase family protein	HMPREF0530_0524	Lactobacillus paracasei subsp. paracasei ATCC 25302	365	40,163	
A0A0R2E5I4	A0A0R2E5I4_LACPA	Alcohol-acetaldehyde dehydrogenase	FC12_GL000830	Lactobacillus paracasei subsp. tolerans DSM 20258	265	28,656	
A0A0R2DG04	A0A0R2DG04_LACPA	Alcohol dehydrogenase	FC12_GL002229	Lactobacillus paracasei subsp. tolerans DSM 20258	346	36,8	
C2FDP9	C2FDP9_LACPA	Zinc-binding alcohol dehydrogenase family protein	HMPREF0530_1707	Lactobacillus paracasei subsp. paracasei ATCC 25302	394	42,523	
A0A0R2D5S6	A0A0R2D5S6_LACPA	Aryl-alcohol dehydrogenase related enzyme	FC12_GL000586	Lactobacillus paracasei subsp. tolerans DSM 20258	210	23,196	
C2FC43	C2FC43_LACPA	Alcohol dehydrogenase, iron-dependent (EC 1.1.1.1)	adh3 HMPREF0530_1151	Lactobacillus paracasei subsp. paracasei ATCC 25302	397	43,126	
U4QBT0	U4QBT0_LACHE	Mannitol dehydrogenase	LHCIRMBIA953_00035	Lactobacillus helveticus CIRM-BIA 953	163	17,476	
A0A0R1FU71	A0A0R1FU71_9LACO	Alcohol dehydrogenase	FD43_GL000824	Lactobacillus kunkeei DSM 12361 = ATCC 700308	344	36,926	
A0A0R1FPJ9	A0A0R1FPJ9_9LACO	Sorbitol dehydrogenase	FD43_GL001235	Lactobacillus kunkeei DSM 12361 = ATCC 700308	333	35,877	
F7SHJ8	F7SHJ8_LACJH	Alcohol dehydrogenase (EC 1.1.1.1)	PF01_00707	Lactobacillus johnsonii pf01	88	9,148	
F7SHJ7	F7SHJ7_LACJH	Alcohol dehydrogenase (EC 1.1.1.1)	PF01_00706	Lactobacillus johnsonii pf01	107	11,509	
A0A0R1FQN7	A0A0R1FQN7_9LACO	NADH-dependent (S)-specific alcohol dehydrogenase	FD43_GL001114	Lactobacillus kunkeei DSM 12361 = ATCC 700308	351	37,526	
U4QBP7	U4QBP7_LACHE	Threonine dehydrogenase-like Zn-dependent dehydrogenase	LHCIRMBIA953_02322	Lactobacillus helveticus CIRM-BIA 953	345	37,293	
A0A0R1KNF5	A0A0R1KNF5_9LACO	Short-chain alcohol dehydrogenase	FC16_GL000621	Lactobacillus coryniformis subsp. torquens DSM 20004 = KCTC 3535	239	25,193	
A0A0R1K879	A0A0R1K879_9LACO	Short-chain alcohol dehydrogenase	FC16_GL002497	Lactobacillus coryniformis subsp. torquens DSM 20004 = KCTC 3535	246	26,308	
A0A0R1SAY5	A0A0R1SAY5_9LACO	Short-chain alcohol dehydrogenase	FC27_GL000768	Lactobacillus versmoldensis DSM 14857 = KCTC 3814	247	26,547	
A0A0R1SCZ5	A0A0R1SCZ5_9LACO	Short-chain alcohol dehydrogenase	FC27_GL002175	Lactobacillus versmoldensis DSM 14857 = KCTC 3814	236	25,651	
A0A0R1KA30	A0A0R1KA30_9LACO	Short-chain alcohol dehydrogenase	FC16_GL002254	Lactobacillus coryniformis subsp. torquens DSM 20004 = KCTC 3535	96	10,235	
A0A0R1SJU9	A0A0R1SJU9_9LACO	Alcohol dehydrogenase	FC27_GL001752	Lactobacillus versmoldensis DSM 14857 = KCTC 3814	346	37	
A0A0R1SDN8	A0A0R1SDN8_9LACO	Alcohol dehydrogenase	FC27_GL001891	Lactobacillus versmoldensis DSM 14857 = KCTC 3814	347	36,791	
A0A0R1JPB9	A0A0R1JPB9_9LACO	Zinc-containing alcohol dehydrogenase (Oxidoreductase)	FC16_GL000673	Lactobacillus coryniformis subsp. torquens DSM 20004 = KCTC 3535	370	40,562	
A0A0R1KLS1	A0A0R1KLS1_9LACO	Zinc-containing alcohol dehydrogenase	FC16_GL001412	Lactobacillus coryniformis subsp. torquens DSM 20004 = KCTC 3535	286	30,541	
A0A0R1SA54	A0A0R1SA54_9LACO	Aryl-alcohol dehydrogenase	FC27_GL001119	Lactobacillus versmoldensis DSM 14857 = KCTC 3814	306	34,225	
A0A0R1SDT7	A0A0R1SDT7_9LACO	Alcohol dehydrogenase	FC27_GL000287	Lactobacillus versmoldensis DSM 14857 = KCTC 3814	347	37,142	
A0A0R1SG96	A0A0R1SG96_9LACO	Aryl-alcohol dehydrogenase	FC27_GL001338	Lactobacillus versmoldensis DSM 14857 = KCTC 3814	373	39,847	
A0A0R1SN50	A0A0R1SN50_9LACO	Aldehyde-alcohol dehydrogenase	FC27_GL001643	Lactobacillus versmoldensis DSM 14857 = KCTC 3814	880	96,536	
A0A0R1K1K8	A0A0R1K1K8_9LACO	Aryl-alcohol dehydrogenase related enzyme	FC16_GL000516	Lactobacillus coryniformis subsp. torquens DSM 20004 = KCTC 3535	279	30,86	
A0A0R1SC42	A0A0R1SC42_9LACO	Alcohol dehydrogenase zinc-binding domain-containing protein	FC27_GL000427	Lactobacillus versmoldensis DSM 14857 = KCTC 3814	318	34,017	
A0A0R1KW50	A0A0R1KW50_9LACO	Alcohol dehydrogenase	FC16_GL001035	Lactobacillus coryniformis subsp. torquens DSM 20004 = KCTC 3535	249	26,439	
A0A0R1KPJ9	A0A0R1KPJ9_9LACO	Alcohol dehydrogenase	FC16_GL000096	Lactobacillus coryniformis subsp. torquens DSM 20004 = KCTC 3535	331	35,295	
A0A0M2G2I6	A0A0M2G2I6_LACRH	Alcohol dehydrogenase	NP51_08180	Lactobacillus rhamnosus	361	38,382	
A0A0R1NZW6	A0A0R1NZW6_9LACO	Alcohol dehydrogenase zinc-binding domain protein	FC47_GL002031	Lactobacillus mucosae DSM 13345	375	40,041	
A0A0M2FXV5	A0A0M2FXV5_LACRH	Uncharacterized protein	NP51_13620	Lactobacillus rhamnosus	197	21,33	
A0A0R1P2J6	A0A0R1P2J6_9LACO	Zinc-binding alcohol dehydrogenase family protein	FC47_GL000917	Lactobacillus mucosae DSM 13345	348	37,998	
A0A0E3CMU4	A0A0E3CMU4_LACRH	Aldehyde-alcohol dehydrogenase	NP51_00025	Lactobacillus rhamnosus	868	94,553	
A0A0J6UUG2	A0A0J6UUG2_LACRH	Alcohol dehydrogenase (Fragment)	PZ01_08685	Lactobacillus rhamnosus	92	9,93	
A0A0M2G1F7	A0A0M2G1F7_LACRH	Alcohol dehydrogenase	NP51_03990	Lactobacillus rhamnosus	318	34,573	
A0A0R1NZ62	A0A0R1NZ62_9LACO	L-threonine 3-dehydrogenase	FC47_GL000406	Lactobacillus mucosae DSM 13345	336	35,831	
A0A0R1NTM4	A0A0R1NTM4_9LACO	Alcohol dehydrogenase, iron-dependent	FC47_GL001382	Lactobacillus mucosae DSM 13345	385	41,972	
A0A0J6UJ61	A0A0J6UJ61_LACRH	Alcohol dehydrogenase	PZ01_14365	Lactobacillus rhamnosus	40	4,27	
A0A0M2FYJ9	A0A0M2FYJ9_LACRH	Aryl-alcohol dehydrogenase	NP51_10200	Lactobacillus rhamnosus	373	39,799	
A0A0M2G3M4	A0A0M2G3M4_LACRH	Alcohol dehydrogenase	NP51_00920	Lactobacillus rhamnosus	340	37,003	
A0A0J6UKX5	A0A0J6UKX5_LACRH	Aryl-alcohol dehydrogenase (Fragment)	PZ01_11130	Lactobacillus rhamnosus	361	38,525	
A0A0J6X5E4	A0A0J6X5E4_LACRH	Alcohol dehydrogenase	PZ01_03210	Lactobacillus rhamnosus	347	38,297	
A0A0J6X787	A0A0J6X787_LACRH	Alcohol dehydrogenase (Fragment)	PZ01_13560	Lactobacillus rhamnosus	268	28,377	
A0A0J6XEE4	A0A0J6XEE4_LACRH	Alcohol dehydrogenase (Fragment)	PZ01_09845	Lactobacillus rhamnosus	282	31,005	
A0A0R1P2X0	A0A0R1P2X0_9LACO	Alcohol dehydrogenase GroES domain protein	FC47_GL000973	Lactobacillus mucosae DSM 13345	340	35,889	
A0A0R1NVH1	A0A0R1NVH1_9LACO	Threonine dehydrogenase	FC47_GL001145	Lactobacillus mucosae DSM 13345	348	37,292	
A0A0R2AEM5	A0A0R2AEM5_9LACO	GroES-like protein	FC14_GL001296	Lactobacillus agilis DSM 20509	430	46,664	
A0A0R2AIH4	A0A0R2AIH4_9LACO	Aryl-alcohol dehydrogenase related enzyme	FC14_GL001990	Lactobacillus agilis DSM 20509	313	35,078	
S2LHJ8	S2LHJ8_LACPA	Aryl-alcohol dehydrogenase related enzyme	Lpl7_1208	Lactobacillus paracasei subsp. tolerans Lpl7	309	34,082	
A0A0R1U9D1	A0A0R1U9D1_9LACO	Alcohol dehydrogenase	FC43_GL001504	Lactobacillus ingluviei DSM 15946	353	37,341	
A0A0R1UA54	A0A0R1UA54_9LACO	Aryl-alcohol dehydrogenase	FC43_GL001014	Lactobacillus ingluviei DSM 15946	371	38,891	
S2LVH0	S2LVH0_LACPA	Uncharacterized protein	Lpl7_1886	Lactobacillus paracasei subsp. tolerans Lpl7	356	38,423	
A0A0R1UEE8	A0A0R1UEE8_9LACO	L-threonine 3-dehydrogenase	FC43_GL000727	Lactobacillus ingluviei DSM 15946	336	35,664	
S2LX72	S2LX72_LACPA	Alcohol dehydrogenase (EC 1.1.1.1)	Lpl7_1304	Lactobacillus paracasei subsp. tolerans Lpl7	346	36,773	
S2LVJ8	S2LVJ8_LACPA	L-threonine dehydrogenase	Lpl7_1911	Lactobacillus paracasei subsp. tolerans Lpl7	334	36,65	
S2M4K6	S2M4K6_LACPA	Aryl-alcohol dehydrogenase-like enzyme	Lpl7_1845	Lactobacillus paracasei subsp. tolerans Lpl7	334	37,02	
A0A0R1T5Q0	A0A0R1T5Q0_9LACO	Alcohol dehydrogenase	FC54_GL000547	Lactobacillus saerimneri DSM 16049	345	36,419	
A0A0R1U3A9	A0A0R1U3A9_9LACO	Threonine dehydrogenase	FC43_GL000890	Lactobacillus ingluviei DSM 15946	348	37,186	
A0A0R1U781	A0A0R1U781_9LACO	Iron-containing alcohol dehydrogenase	FC43_GL001968	Lactobacillus ingluviei DSM 15946	392	42,181	
A0A0R1U839	A0A0R1U839_9LACO	Alcohol dehydrogenase	FC43_GL001733	Lactobacillus ingluviei DSM 15946	341	35,895	
I7KMV4	I7KMV4_9LACO	Alcohol dehydrogenase, zinc-binding	BN52_06525	Lactobacillus gigeriorum DSM 23908 = CRBIP 24.85	345	36,702	
D6S4V4	D6S4V4_9LACO	Bifunctional acetaldehyde-CoA/alcohol dehydrogenase	HMPREF0526_10735	Lactobacillus jensenii JV-V16	223	24,306	
D6S4V5	D6S4V5_9LACO	Alcohol dehydrogenase, iron-dependent (EC 1.1.1.1)	HMPREF0526_10736	Lactobacillus jensenii JV-V16	610	67,373	
D6S4Z4	D6S4Z4_9LACO	GroES-like protein	HMPREF0526_10951	Lactobacillus jensenii JV-V16	344	37,105	
A0A0R1G470	A0A0R1G470_9LACO	Threonine dehydrogenase	FD23_GL000609	Lactobacillus delbrueckii subsp. delbrueckii DSM 20074 = JCM 1012	344	36,643	
A0A0R1FG47	A0A0R1FG47_9LACO	Alcohol dehydrogenase	FD23_GL001382	Lactobacillus delbrueckii subsp. delbrueckii DSM 20074 = JCM 1012	382	41,186	
A0A0R1FJ04	A0A0R1FJ04_9LACO	Iron-binding alcohol dehydrogenase and aldehyde dehydrogenase enzyme	FD23_GL001490	Lactobacillus delbrueckii subsp. delbrueckii DSM 20074 = JCM 1012	464	50,234	
A0A0G8G465	A0A0G8G465_9LACO	Aldehyde-alcohol dehydrogenase	LRP_1912	Lactobacillus ruminis	898	98,617	
A0A0G8GC29	A0A0G8GC29_9LACO	Aldehyde-alcohol dehydrogenase	LRP_1472	Lactobacillus ruminis	462	49,169	
A0A0G8G572	A0A0G8G572_9LACO	Aldehyde-alcohol dehydrogenase 2	LRP_1958	Lactobacillus ruminis	358	40,158	
A0A0G8GC38	A0A0G8GC38_9LACO	Alcohol dehydrogenase	LRB_735	Lactobacillus ruminis	346	36,801	
A0A0G8G9E8	A0A0G8G9E8_9LACO	Alcohol dehydrogenase	LRP_1278	Lactobacillus ruminis	346	36,834	
A0A0G8GAD7	A0A0G8GAD7_9LACO	Aldehyde-alcohol dehydrogenase	LRB_1196	Lactobacillus ruminis	898	98,676	
A0A0G8GDN0	A0A0G8GDN0_9LACO	Aldehyde-alcohol dehydrogenase	LRB_1230	Lactobacillus ruminis	462	49,139	
S4PQL9	S4PQL9_9LACO	Zinc-binding alcohol dehydrogenase family protein	LOT_1878	Lactobacillus otakiensis DSM 19908 = JCM 15040	341	38,024	
S4PNU1	S4PNU1_9LACO	Aryl-alcohol dehydrogenase	LOT_0618	Lactobacillus otakiensis DSM 19908 = JCM 15040	373	39,879	
S4NIF7	S4NIF7_9LACO	Short-chain alcohol dehydrogenase	LOT_1560	Lactobacillus otakiensis DSM 19908 = JCM 15040	255	26,734	
S4PQX6	S4PQX6_9LACO	Aryl-alcohol dehydrogenase	LOT_2123	Lactobacillus otakiensis DSM 19908 = JCM 15040	377	40,468	
S4PQ67	S4PQ67_9LACO	Acetaldehyde dehydrogenase	LOT_1488	Lactobacillus otakiensis DSM 19908 = JCM 15040	872	95,033	
S4NNS6	S4NNS6_9LACO	Alcohol dehydrogenase GroES domain-containing protein	LOT_0236	Lactobacillus otakiensis DSM 19908 = JCM 15040	338	36,185	
S4NTQ3	S4NTQ3_9LACO	Alcohol dehydrogenase zinc-binding domain-containing protein	LOT_1901	Lactobacillus otakiensis DSM 19908 = JCM 15040	308	32,494	
S4PQN2	S4PQN2_9LACO	Short-chain alcohol dehydrogenase	LOT_1908	Lactobacillus otakiensis DSM 19908 = JCM 15040	253	26,716	
S4NL05	S4NL05_9LACO	NADH-dependent (S)-specific alcohol dehydrogenase	LOT_1124	Lactobacillus otakiensis DSM 19908 = JCM 15040	347	36,775	
S4NJU8	S4NJU8_9LACO	Aryl-alcohol dehydrogenase related enzyme	LOT_0714	Lactobacillus otakiensis DSM 19908 = JCM 15040	301	33,445	
A0A0R2CMB2	A0A0R2CMB2_9LACO	Uncharacterized protein	FC87_GL000345	Lactobacillus florum DSM 22689 = JCM 16035	355	38,086	
A0A0R2CKR5	A0A0R2CKR5_9LACO	Alcohol dehydrogenase, zinc-containing	FC87_GL000707	Lactobacillus florum DSM 22689 = JCM 16035	123	13,907	
N1ZW74	N1ZW74_9LACO	Alcohol dehydrogenase	C822_01531	Lactobacillus murinus ASF361	348	36,998	
A0A0R2CGT9	A0A0R2CGT9_9LACO	Alcohol dehydrogenase	FC87_GL001219	Lactobacillus florum DSM 22689 = JCM 16035	340	35,831	
N1ZRJ8	N1ZRJ8_9LACO	Alcohol dehydrogenase, propanol-preferring	C822_01366	Lactobacillus murinus ASF361	338	35,352	
A0A0R2CFS7	A0A0R2CFS7_9LACO	Alcohol dehydrogenase, zinc-containing	FC87_GL001245	Lactobacillus florum DSM 22689 = JCM 16035	339	36,657	
A0A0R2CFY4	A0A0R2CFY4_9LACO	Threonine dehydrogenase related Zn-dependent dehydrogenase	FC87_GL001308	Lactobacillus florum DSM 22689 = JCM 16035	341	37,165	
S4NEH0	S4NEH0_9LACO	Zinc-binding alcohol dehydrogenase family protein	LOT_0110	Lactobacillus otakiensis DSM 19908 = JCM 15040	358	39,106	
S4NKN7	S4NKN7_9LACO	Alcohol dehydrogenase zinc-binding domain-containing protein	LOT_1019	Lactobacillus otakiensis DSM 19908 = JCM 15040	323	35,022	
S4NSW7	S4NSW7_9LACO	Zn-dependent dehydrogenase	LOT_1611	Lactobacillus otakiensis DSM 19908 = JCM 15040	338	36,464	
A0A0R2MTT0	A0A0R2MTT0_9LACO	Uncharacterized protein	IV56_GL000272	Lactobacillus saniviri JCM 17471 = DSM 24301	366	40,659	
C7TAF6	C7TAF6_LACRG	Short-chain alcohol dehydrogenase	LRHM_0681	Lactobacillus rhamnosus (strain ATCC 53103 / GG)	286	31,769	
A0A0R2MVT8	A0A0R2MVT8_9LACO	Alcohol dehydrogenase	IV56_GL002212	Lactobacillus saniviri JCM 17471 = DSM 24301	327	35,011	
A0A0R2MW16	A0A0R2MW16_9LACO	Alcohol dehydrogenase	IV56_GL002203	Lactobacillus saniviri JCM 17471 = DSM 24301	343	37,504	
A0A0R2N0S2	A0A0R2N0S2_9LACO	Short-chain alcohol dehydrogenase	IV56_GL001486	Lactobacillus saniviri JCM 17471 = DSM 24301	297	31,744	
C7TBX2	C7TBX2_LACRG	Short-chain alcohol dehydrogenase	LRHM_1166	Lactobacillus rhamnosus (strain ATCC 53103 / GG)	311	33,857	
A0A0R2MTP9	A0A0R2MTP9_9LACO	Short-chain alcohol dehydrogenase	IV56_GL000696	Lactobacillus saniviri JCM 17471 = DSM 24301	264	28,561	
A0A0R2MSF5	A0A0R2MSF5_9LACO	Alcohol dehydrogenase GroES domain-containing protein	IV56_GL000243	Lactobacillus saniviri JCM 17471 = DSM 24301	320	34,181	
A0A0R2MUQ7	A0A0R2MUQ7_9LACO	Iron-containing alcohol dehydrogenase	IV56_GL002318	Lactobacillus saniviri JCM 17471 = DSM 24301	383	41,245	
C7T7Q1	C7T7Q1_LACRG	Alcohol dehydrogenase	LRHM_2586	Lactobacillus rhamnosus (strain ATCC 53103 / GG)	373	39,795	
A0A0R2MWM0	A0A0R2MWM0_9LACO	Alcohol dehydrogenase	IV56_GL001710	Lactobacillus saniviri JCM 17471 = DSM 24301	335	35,853	
A0A0R1U3E6	A0A0R1U3E6_9LACO	Alcohol dehydrogenase superfamily,zinc-containing protein	FC32_GL000417	Lactobacillus apodemi DSM 16634 = JCM 16172	346	36,984	
C7TEH6	C7TEH6_LACRG	Alcohol-acetaldehyde dehydrogenase	LRHM_2044	Lactobacillus rhamnosus (strain ATCC 53103 / GG)	398	43,303	
A0A0R1U0Y2	A0A0R1U0Y2_9LACO	Ethanol-active dehydrogenase acetaldehyde-active reductase	FC32_GL000550	Lactobacillus apodemi DSM 16634 = JCM 16172	339	35,618	
C7T7V2	C7T7V2_LACRG	Putative alcohol dehydrogenase	LRHM_2637	Lactobacillus rhamnosus (strain ATCC 53103 / GG)	347	38,297	
C7T841	C7T841_LACRG	Aryl-alcohol dehydrogenase	LRHM_2724	Lactobacillus rhamnosus (strain ATCC 53103 / GG)	309	34,115	
A0A0R1TX90	A0A0R1TX90_9LACO	Alcohol dehydrogenase	FC32_GL000645	Lactobacillus apodemi DSM 16634 = JCM 16172	345	36,691	
A0A0R1KW17	A0A0R1KW17_9LACO	Short-chain alcohol dehydrogenase	FD17_GL000894	Lactobacillus sunkii DSM 19904	253	26,673	
A0A0R1L6Z2	A0A0R1L6Z2_9LACO	Aryl-alcohol dehydrogenase family enzyme	FD17_GL002356	Lactobacillus sunkii DSM 19904	330	36,691	
A0A0R1KTN8	A0A0R1KTN8_9LACO	Aryl-alcohol dehydrogenase	FD17_GL001410	Lactobacillus sunkii DSM 19904	373	39,865	
A0A0R1L0T0	A0A0R1L0T0_9LACO	Alcohol dehydrogenase GroES domain-containing protein	FD17_GL001003	Lactobacillus sunkii DSM 19904	316	34,428	
A0A0R1LCF0	A0A0R1LCF0_9LACO	Zinc-binding alcohol dehydrogenase family protein	FD17_GL000258	Lactobacillus sunkii DSM 19904	355	38,726	
A0A0R1KSM4	A0A0R1KSM4_9LACO	Nadh-dependent (S)-specific alcohol dehydrogenase	FD17_GL001903	Lactobacillus sunkii DSM 19904	347	37,084	
A0A0R1L2I4	A0A0R1L2I4_9LACO	L-threonine 3-dehydrogenase	FD17_GL001477	Lactobacillus sunkii DSM 19904	333	35,92	
A0A0R1LBZ1	A0A0R1LBZ1_9LACO	Alcohol dehydrogenase GroES domain-containing protein	FD17_GL000127	Lactobacillus sunkii DSM 19904	338	36,157	
A0A0R1L427	A0A0R1L427_9LACO	Alcohol dehydrogenase zinc-binding domain-containing protein	FD17_GL000872	Lactobacillus sunkii DSM 19904	304	32,36	
A0A0R1KVU9	A0A0R1KVU9_9LACO	Alcohol dehydrogenase zinc-binding domain-containing protein	FD17_GL000901	Lactobacillus sunkii DSM 19904	308	32,711	
A0A0R1L8T6	A0A0R1L8T6_9LACO	L-iditol 2-dehydrogenase	FD17_GL001229	Lactobacillus sunkii DSM 19904	356	38,343	
A0A0R1P1X1	A0A0R1P1X1_9LACO	Aryl-alcohol dehydrogenase	FC94_GL001543	Lactobacillus kefiranofaciens subsp. kefirgranum DSM 10550 = JCM 8572	373	40,121	
A0A0R1NZV7	A0A0R1NZV7_9LACO	Uncharacterized protein	FC94_GL001807	Lactobacillus kefiranofaciens subsp. kefirgranum DSM 10550 = JCM 8572	346	37,207	
A0A0R1KVT4	A0A0R1KVT4_9LACO	Aryl-alcohol dehydrogenase	FD17_GL001325	Lactobacillus sunkii DSM 19904	377	40,164	
A0A0R1KYI2	A0A0R1KYI2_9LACO	Alcohol dehydrogenase zinc-binding domain-containing protein	FD17_GL002124	Lactobacillus sunkii DSM 19904	334	36,479	
A0A0R1KTZ0	A0A0R1KTZ0_9LACO	Aryl-alcohol dehydrogenase	FD17_GL001409	Lactobacillus sunkii DSM 19904	373	39,961	
K0NS88	K0NS88_9LACO	Aldehyde-alcohol dehydrogenase (EC 1.1.1.1)	BN146_03110	Lactobacillus equicursoris 66c	457	49,369	
F8DNM8	F8DNM8_LACRS	Zinc-binding alcohol dehydrogenase family protein (EC 1.-.-.-)	HMPREF0538_20661	Lactobacillus reuteri (strain ATCC 55730 / SD2112)	348	37,938	
T0SE06	T0SE06_LACFE	Alcohol dehydrogenase	N219_09095	Lactobacillus fermentum MTCC 8711	339	35,783	
T0SLN0	T0SLN0_LACFE	Alcohol dehydrogenase	N219_09465	Lactobacillus fermentum MTCC 8711	347	37,105	
K0NRF0	K0NRF0_9LACO	Threonine dehydrogenase and related Zn-dependent dehydrogenase	BN146_10415	Lactobacillus equicursoris 66c	347	36,746	
F8DNT9	F8DNT9_LACRS	Benzyl alcohol dehydrogenase AreB domain protein	HMPREF0538_20722	Lactobacillus reuteri (strain ATCC 55730 / SD2112)	141	15,189	
T0SKM4	T0SKM4_LACFE	Alcohol dehydrogenase	N219_04855	Lactobacillus fermentum MTCC 8711	363	39,029	
F8DQ25	F8DQ25_LACRS	Alcohol dehydrogenase, iron-dependent (EC 1.1.1.1)	HMPREF0538_20920	Lactobacillus reuteri (strain ATCC 55730 / SD2112)	379	40,915	
F8DNA0	F8DNA0_LACRS	Alcohol dehydrogenase, propanol-preferring (EC 1.1.1.1)	adhP HMPREF0538_20607	Lactobacillus reuteri (strain ATCC 55730 / SD2112)	342	36,185	
T0TNN3	T0TNN3_LACFE	Alcohol dehydrogenase	N219_05880	Lactobacillus fermentum MTCC 8711	356	37,87	
F8DQV8	F8DQV8_LACRS	Putative chlorophyll synthesis pathway protein BchC	HMPREF0538_21071	Lactobacillus reuteri (strain ATCC 55730 / SD2112)	336	35,976	
M5J5J6	M5J5J6_9LACO	Alcohol dehydrogenase	D271_01088	Lactobacillus saerimneri 30a	347	36,665	
A0A0R1MWL3	A0A0R1MWL3_9LACO	Short-chain alcohol dehydrogenase	FD38_GL002303	Lactobacillus zymae DSM 19395	257	27,342	
A0A0R1MSY9	A0A0R1MSY9_9LACO	Short-chain alcohol dehydrogenase	FD38_GL002337	Lactobacillus zymae DSM 19395	239	24,85	
A0A0R1MJD7	A0A0R1MJD7_9LACO	Short-chain alcohol dehydrogenase	FD38_GL000110	Lactobacillus zymae DSM 19395	297	33,393	
A0A0R1MKG3	A0A0R1MKG3_9LACO	Short-chain alcohol dehydrogenase	FD38_GL002437	Lactobacillus zymae DSM 19395	264	28,939	
A0A0R1NIS2	A0A0R1NIS2_9LACO	Threonine dehydrogenase related Zn-dependent dehydrogenase	FD38_GL000176	Lactobacillus zymae DSM 19395	335	35,69	
A0A0R1N629	A0A0R1N629_9LACO	Alcohol dehydrogenase	FD38_GL000625	Lactobacillus zymae DSM 19395	347	36,518	
A0A0R1MKD2	A0A0R1MKD2_9LACO	Benzyl alcohol dehydrogenase AreB	FD38_GL002378	Lactobacillus zymae DSM 19395	373	39,759	
A0A0R1MHP0	A0A0R1MHP0_9LACO	Alcohol dehydrogenase	FD38_GL000243	Lactobacillus zymae DSM 19395	338	36,021	
A0A0R1N5G2	A0A0R1N5G2_9LACO	Alcohol dehydrogenase	FD38_GL001401	Lactobacillus zymae DSM 19395	250	27,422	
A0A0R1N6F2	A0A0R1N6F2_9LACO	Alcohol dehydrogenase	FD38_GL000653	Lactobacillus zymae DSM 19395	345	36,442	
A0A0R1NCX2	A0A0R1NCX2_9LACO	Aryl-alcohol dehydrogenase related enzyme	FD38_GL000421	Lactobacillus zymae DSM 19395	318	35,73	
A0A0R1N2T9	A0A0R1N2T9_9LACO	Aryl-alcohol dehydrogenase related enzyme	FD38_GL001411	Lactobacillus zymae DSM 19395	323	35,689	
A0A0R1NK32	A0A0R1NK32_9LACO	Threonine dehydrogenase related Zn-dependent dehydrogenase	FD38_GL000173	Lactobacillus zymae DSM 19395	352	37,717	
A0A0R1MFV4	A0A0R1MFV4_9LACO	Alcohol dehydrogenase	FD38_GL000382	Lactobacillus zymae DSM 19395	351	37,876	
A0A0R1N3W8	A0A0R1N3W8_9LACO	Oxidoreductase, aryl-alcohol dehydrogenase related	FD38_GL001637	Lactobacillus zymae DSM 19395	338	37,464	
A0A0R1MHR6	A0A0R1MHR6_9LACO	Aryl-alcohol dehydrogenase related enzyme	FD38_GL000067	Lactobacillus zymae DSM 19395	280	30,969	
D0DI37	D0DI37_9LACO	Aldehyde-alcohol dehydrogenase 2 (EC 1.1.1.1) (EC 1.2.1.10)	adh HMPREF0508_01286	Lactobacillus crispatus MV-3A-US	659	72,291	
S2NBV6	S2NBV6_LACPA	Alcohol dehydrogenase (EC 1.1.1.1)	Lpp225_0950	Lactobacillus paracasei subsp. paracasei Lpp225	346	36,861	
S2NNZ2	S2NNZ2_LACPA	Aryl-alcohol dehydrogenase related enzyme	Lpp225_2439	Lactobacillus paracasei subsp. paracasei Lpp225	309	34,005	
S2P2N1	S2P2N1_LACPA	Uncharacterized protein	Lpp225_1669	Lactobacillus paracasei subsp. paracasei Lpp225	356	38,421	
S2P6R2	S2P6R2_LACPA	Aryl-alcohol dehydrogenase-like enzyme	Lpp225_0434	Lactobacillus paracasei subsp. paracasei Lpp225	334	37,02	
S2P0U9	S2P0U9_LACPA	Sorbitol-6-phosphate 2-dehydrogenase (EC 1.1.1.140)	Lpp225_2140	Lactobacillus paracasei subsp. paracasei Lpp225	138	14,985	
A0A0R2L9A2	A0A0R2L9A2_9LACO	Zn-dependent alcohol dehydrogenase	IV66_GL000355	Lactobacillus pobuzihii	337	36,273	
A0A0R2LN66	A0A0R2LN66_9LACO	Aldehyde-alcohol dehydrogenase	IV66_GL001368	Lactobacillus pobuzihii	899	99,305	
A0A0R2LIR6	A0A0R2LIR6_9LACO	Aryl-alcohol dehydrogenase-like protein	IV66_GL002160	Lactobacillus pobuzihii	329	37,239	
A0A0R2LH71	A0A0R2LH71_9LACO	Short-chain alcohol dehydrogenase	IV66_GL001112	Lactobacillus pobuzihii	251	26,771	
A0A0R2LM42	A0A0R2LM42_9LACO	Aryl-alcohol dehydrogenase	IV66_GL000496	Lactobacillus pobuzihii	339	36,255	
A0A0R2L205	A0A0R2L205_9LACO	Alcohol dehydrogenase	IV66_GL001029	Lactobacillus pobuzihii	337	35,686	
A0A0R2L8M5	A0A0R2L8M5_9LACO	Alcohol dehydrogenase	IV66_GL000372	Lactobacillus pobuzihii	326	34,568	
D4YSV5	D4YSV5_9LACO	Aldehyde dehydrogenase (NAD) family protein (EC 1.2.1.-)	adhE HMPREF0493_0583	Lactobacillus amylolyticus DSM 11664	874	96,147	
A0A0R2L889	A0A0R2L889_9LACO	L-iditol 2-dehydrogenase	IV66_GL000319	Lactobacillus pobuzihii	354	38,247	
A0A0R2LH19	A0A0R2LH19_9LACO	L-iditol 2-dehydrogenase	IV66_GL000318	Lactobacillus pobuzihii	365	39,648	
D4YUB3	D4YUB3_9LACO	GroES-like protein (EC 1.1.1.90)	adhC HMPREF0493_1124	Lactobacillus amylolyticus DSM 11664	373	40,33	
A0A0R2LD88	A0A0R2LD88_9LACO	Aryl-alcohol dehydrogenase related enzyme	IV66_GL001460	Lactobacillus pobuzihii	316	34,753	
A0A0R2LHE8	A0A0R2LHE8_9LACO	Short-chain alcohol dehydrogenase	IV66_GL001111	Lactobacillus pobuzihii	251	26,645	
A0A0R1MGK3	A0A0R1MGK3_9LACO	L-iditol 2-dehydrogenase	FC92_GL002132	Lactobacillus hordei DSM 19519	356	38,462	
A0A0R1MI69	A0A0R1MI69_9LACO	Aryl-alcohol dehydrogenase related enzyme	FC92_GL001785	Lactobacillus hordei DSM 19519	279	31,115	
A0A0R1MFN1	A0A0R1MFN1_9LACO	Aryl-alcohol dehydrogenase related enzyme	FC92_GL000727	Lactobacillus hordei DSM 19519	315	34,861	
A0A0R1M863	A0A0R1M863_9LACO	Alcohol dehydrogenase	FC92_GL001776	Lactobacillus hordei DSM 19519	345	37,023	
A0A0R1MGN2	A0A0R1MGN2_9LACO	Alcohol dehydrogenase	FC92_GL002151	Lactobacillus hordei DSM 19519	334	37,022	
J0L572	J0L572_9LACO	Short-chain alcohol dehydrogenase	LMA_06406	Lactobacillus mali KCTC 3596 = DSM 20444	68	7,195	
A0A0R1KFK6	A0A0R1KFK6_9LACO	Short-chain alcohol dehydrogenase	FC78_GL002338	Lactobacillus paralimentarius DSM 19674	240	26,252	
J0KX61	J0KX61_9LACO	Short-chain alcohol dehydrogenase	LMA_08563	Lactobacillus mali KCTC 3596 = DSM 20444	284	31,632	
A0A0R2E7Z3	A0A0R2E7Z3_9LACO	Short-chain alcohol dehydrogenase	FD00_GL001990	Lactobacillus mali KCTC 3596 = DSM 20444	298	33,167	
A0A0R1KK45	A0A0R1KK45_9LACO	Short-chain alcohol dehydrogenase	FC78_GL000305	Lactobacillus paralimentarius DSM 19674	264	29,496	
J0L0X2	J0L0X2_9LACO	Alcohol dehydrogenase, zinc-binding protein	LMA_02079	Lactobacillus mali KCTC 3596 = DSM 20444	339	37,836	
A0A0R1KPW1	A0A0R1KPW1_9LACO	Aryl-alcohol dehydrogenase	FC78_GL001835	Lactobacillus paralimentarius DSM 19674	373	40,006	
A0A0R1KU63	A0A0R1KU63_9LACO	Alcohol dehydrogenase	FC78_GL001097	Lactobacillus paralimentarius DSM 19674	346	36,861	
A0A0R1KK80	A0A0R1KK80_9LACO	Alcohol dehydrogenase, zinc-binding protein	FC78_GL000337	Lactobacillus paralimentarius DSM 19674	340	38,2	
A0A0R1KRV7	A0A0R1KRV7_9LACO	Alcohol dehydrogenase zinc-binding domain-containing protein	FC78_GL001629	Lactobacillus paralimentarius DSM 19674	317	33,436	
A0A0R1KQ54	A0A0R1KQ54_9LACO	Alcohol dehydrogenase	FC78_GL001933	Lactobacillus paralimentarius DSM 19674	347	37,156	
A0A0R1KU83	A0A0R1KU83_9LACO	Aldehyde-alcohol dehydrogenase 2	FC78_GL001039	Lactobacillus paralimentarius DSM 19674	511	54,474	
A0A0R1JHN7	A0A0R1JHN7_LACSK	AdhA protein	FD49_GL001450	Lactobacillus sakei subsp. sakei DSM 20017 = JCM 1157	323	34,144	
A0A0R1JLG6	A0A0R1JLG6_LACSK	Adh protein	FD49_GL000367	Lactobacillus sakei subsp. sakei DSM 20017 = JCM 1157	346	36,334	
A0A0R1KP48	A0A0R1KP48_9LACO	Alcohol dehydrogenase	FC78_GL000888	Lactobacillus paralimentarius DSM 19674	347	36,761	
A0A0R2E0G1	A0A0R2E0G1_9LACO	Alcohol dehydrogenase, zinc-binding protein	FD00_GL000694	Lactobacillus mali KCTC 3596 = DSM 20444	345	38,643	
A0A0R2E4C9	A0A0R2E4C9_9LACO	Aryl-alcohol dehydrogenase related enzyme	FD00_GL001190	Lactobacillus mali KCTC 3596 = DSM 20444	306	33,826	
A0A0R1R3A3	A0A0R1R3A3_9LACO	Aryl-alcohol dehydrogenase family enzyme	FD48_GL001459	Lactobacillus paraplantarum DSM 10667	330	36,979	
A0A0R1RC17	A0A0R1RC17_9LACO	Alcohol dehydrogenase	FD48_GL002351	Lactobacillus paraplantarum DSM 10667	346	36,632	
A0A0R1R363	A0A0R1R363_9LACO	Alcohol dehydrogenase, zinc-binding	FD48_GL000517	Lactobacillus paraplantarum DSM 10667	355	39,121	
A0A0R1QZ15	A0A0R1QZ15_9LACO	Alcohol dehydrogenase	FD48_GL001633	Lactobacillus paraplantarum DSM 10667	314	33,203	
A0A0R1R3X3	A0A0R1R3X3_9LACO	Alcohol dehydrogenase	FD48_GL000390	Lactobacillus paraplantarum DSM 10667	350	37,125	
A0A0R1R9C8	A0A0R1R9C8_9LACO	Aryl-alcohol dehydrogenase	FD48_GL002260	Lactobacillus paraplantarum DSM 10667	373	39,96	
A0A0A7U6A9	A0A0A7U6A9_LACBR	Alcohol dehydrogenase	L747_04060	Lactobacillus brevis BSO 464	338	36,034	
A0A0A7U1J0	A0A0A7U1J0_LACBR	NADP-dependent aryl-alcohol dehydrogenase	L747_04620	Lactobacillus brevis BSO 464	340	37,845	
A0A0A7TZW6	A0A0A7TZW6_LACBR	Alcohol dehydrogenase	L747_04605	Lactobacillus brevis BSO 464	362	38,566	
A0A0A7U3L7	A0A0A7U3L7_LACBR	Molecular chaperone GroES	L747_13215	Lactobacillus brevis BSO 464	347	36,898	
A0A0A7U7F4	A0A0A7U7F4_LACBR	Alcohol dehydrogenase	L747_06980	Lactobacillus brevis BSO 464	373	40,335	
A0A0A7U1S3	A0A0A7U1S3_LACBR	Alcohol dehydrogenase	L747_09960	Lactobacillus brevis BSO 464	336	35,597	
A0A0A7TZX5	A0A0A7TZX5_LACBR	Alcohol dehydrogenase	L747_02745	Lactobacillus brevis BSO 464	370	39,089	
A0A0A7U2Q4	A0A0A7U2Q4_LACBR	Alcohol dehydrogenase	L747_12585	Lactobacillus brevis BSO 464	333	35,695	
A0A0E1PKP9	A0A0E1PKP9_LACPA	Short-chain alcohol dehydrogenase	LBPC_0633	Lactobacillus paracasei subsp. paracasei JCM 8130	286	31,822	
A0A0E1PIT4	A0A0E1PIT4_LACPA	Short-chain alcohol dehydrogenase	LBPC_1127	Lactobacillus paracasei subsp. paracasei JCM 8130	311	34,102	
C5F9T9	C5F9T9_LACPA	Short-chain alcohol dehydrogenase	LBPG_02655	Lactobacillus paracasei subsp. paracasei 8700:2	277	30,196	
A0A0D1A4J7	A0A0D1A4J7_9LACO	Short-chain alcohol dehydrogenase	WDC_1593	Lactobacillus wasatchensis	252	26,589	
K6SG19	K6SG19_LACCA	Short-chain alcohol dehydrogenase (EC 1.-.-.-)	LCAUW4_1919	Lactobacillus casei UW4	237	24,321	
K6RZW1	K6RZW1_LACCA	Aryl-alcohol dehydrogenase-related enzyme	LCAUW4_2615	Lactobacillus casei UW4	309	34,035	
K6S6X4	K6S6X4_LACCA	Alcohol dehydrogenase (EC 1.-.-.-) (EC 1.1.1.1)	LCAUW4_0613	Lactobacillus casei UW4	319	33,357	
A0A0D1A8W2	A0A0D1A8W2_9LACO	Alcohol dehydrogenase (EC 1.1.1.1)	WDC_1185	Lactobacillus wasatchensis	346	37,039	
A0A0D1A4E5	A0A0D1A4E5_9LACO	Alcohol dehydrogenase (EC 1.1.1.1)	WDC_1660	Lactobacillus wasatchensis	351	37,923	
A0A0D0YWC7	A0A0D0YWC7_9LACO	Alcohol dehydrogenase (EC 1.1.1.1)	WDC_0851	Lactobacillus wasatchensis	373	39,871	
C5FA59	C5FA59_LACPA	Alcohol dehydrogenase	LBPG_02772	Lactobacillus paracasei subsp. paracasei 8700:2	319	33,377	
K6RWX6	K6RWX6_LACCA	Zn-dependent dehydrogenase (EC 1.-.-.-)	LCAUW4_2786	Lactobacillus casei UW4	360	38,823	
A0A0D1A864	A0A0D1A864_9LACO	Aryl-alcohol dehydrogenase like protein	WDC_1430	Lactobacillus wasatchensis	334	37,027	
C5F8U6	C5F8U6_LACPA	Alcohol dehydrogenase	LBPG_02139	Lactobacillus paracasei subsp. paracasei 8700:2	346	36,791	
C5F7B6	C5F7B6_LACPA	Alcohol dehydrogenase	LBPG_01359	Lactobacillus paracasei subsp. paracasei 8700:2	334	36,636	
C5FA45	C5FA45_LACPA	Alcohol dehydrogenase	LBPG_02789	Lactobacillus paracasei subsp. paracasei 8700:2	340	36,24	
A0A0D0YY34	A0A0D0YY34_9LACO	Alcohol dehydrogenase (EC 1.1.1.1)	adh WDC_0296	Lactobacillus wasatchensis	338	35,613	
A0A0E1PKQ5	A0A0E1PKQ5_LACPA	Aryl-alcohol dehydrogenase	LBPC_2771	Lactobacillus paracasei subsp. paracasei JCM 8130	309	34,063	
A0A0D0YWV1	A0A0D0YWV1_9LACO	Zinc-containing alcohol dehydrogenase / quinone oxidoreductase	WDC_0641	Lactobacillus wasatchensis	338	36,558	
A0A0D1A3Y7	A0A0D1A3Y7_9LACO	Zinc-containing alcohol dehydrogenase/ quinone oxidoreductase	WDC_1890	Lactobacillus wasatchensis	62	6,5	
A0A0D1A7F1	A0A0D1A7F1_9LACO	Alcohol dehydrogenase (EC 1.1.1.1)	WDC_1793	Lactobacillus wasatchensis	346	36,883	
A0A0E1PF01	A0A0E1PF01_LACPA	Alcohol dehydrogenase	LBPC_0134	Lactobacillus paracasei subsp. paracasei JCM 8130	310	32,217	
K6S7J7	K6S7J7_LACCA	Zinc-containing alcohol dehydrogenase/quinone oxidoreductase [NADPH] (EC 1.-.-.-) (EC 1.1.1.-)	LCAUW4_1616	Lactobacillus casei UW4	320	34,448	
K6RSJ1	K6RSJ1_LACCA	Zinc-containing alcohol dehydrogenase/quinone oxidoreductase [NADPH] (EC 1.1.1.-)	LCAUW4_0562	Lactobacillus casei UW4	142	15,351	
K6S115	K6S115_LACCA	Aryl-alcohol dehydrogenase-related enzyme	LCAUW4_2464	Lactobacillus casei UW4	291	32,307	
K6S6C8	K6S6C8_LACCA	Zinc-containing alcohol dehydrogenase/quinone oxidoreductase [NADPH] (EC 1.-.-.-) (EC 1.1.1.-)	LCAUW4_0630	Lactobacillus casei UW4	340	36,244	
A0A0E1PQ02	A0A0E1PQ02_LACPA	Alcohol dehydrogenase	LBPC_2153	Lactobacillus paracasei subsp. paracasei JCM 8130	346	36,923	
K6SER2	K6SER2_LACCA	Alcohol dehydrogenase (EC 1.-.-.-) (EC 1.1.1.1)	LCAUW4_2078	Lactobacillus casei UW4	346	36,791	
A0A0D1A6N6	A0A0D1A6N6_9LACO	Aldehyde-alcohol dehydrogenase	WDC_1006	Lactobacillus wasatchensis	867	94,646	
A0A0E1PIX2	A0A0E1PIX2_LACPA	Alcohol-acetaldehyde dehydrogenase	LBPC_2059	Lactobacillus paracasei subsp. paracasei JCM 8130	397	43,126	
A0A0D0YTQ2	A0A0D0YTQ2_9LACO	Alcohol dehydrogenase (EC 1.1.1.1)	WDC_1791	Lactobacillus wasatchensis	345	36,751	
A0A0R1RHY6	A0A0R1RHY6_9LACO	Ethanol-active dehydrogenase acetaldehyde-active reductase	FC70_GL000535	Lactobacillus oligofermentans DSM 15707 = LMG 22743	338	35,736	
A0A0R1RE96	A0A0R1RE96_9LACO	Alcohol dehydrogenase	FC70_GL001533	Lactobacillus oligofermentans DSM 15707 = LMG 22743	345	36,691	
A0A0R1REK2	A0A0R1REK2_9LACO	Short-chain alcohol dehydrogenase	FC70_GL001050	Lactobacillus oligofermentans DSM 15707 = LMG 22743	252	26,855	
Q1WRE8	Q1WRE8_LACS1	Aryl-alcohol dehydrogenase (EC 1.1.1.90)	adhC LSL_1748	Lactobacillus salivarius (strain UCC118)	373	40,175	
A0A0R1XBL0	A0A0R1XBL0_9LACO	Aryl-alcohol dehydrogenase-like protein	FC65_GL000540	Lactobacillus acidipiscis DSM 15836	329	37,207	
A0A0R1XMZ4	A0A0R1XMZ4_9LACO	Alcohol dehydrogenase	FC65_GL001782	Lactobacillus acidipiscis DSM 15836	341	36,241	
A0A0R1X8P8	A0A0R1X8P8_9LACO	Alcohol dehydrogenase	FC65_GL000818	Lactobacillus acidipiscis DSM 15836	154	16,821	
A0A0R1X4Q2	A0A0R1X4Q2_9LACO	Alcohol dehydrogenase	FC65_GL000817	Lactobacillus acidipiscis DSM 15836	127	13,57	
A0A0R1X8F0	A0A0R1X8F0_9LACO	Sorbitol dehydrogenase	FC65_GL000533	Lactobacillus acidipiscis DSM 15836	360	39,404	
A0A0R1XEG5	A0A0R1XEG5_9LACO	Zn-dependent alcohol dehydrogenase	FC65_GL002107	Lactobacillus acidipiscis DSM 15836	354	38,209	
A0A0R1XN98	A0A0R1XN98_9LACO	L-iditol 2-dehydrogenase	FC65_GL001701	Lactobacillus acidipiscis DSM 15836	354	37,951	
A0A0R1XMD7	A0A0R1XMD7_9LACO	Aryl-alcohol dehydrogenase related enzyme	FC65_GL001982	Lactobacillus acidipiscis DSM 15836	306	33,318	
A0A0R1XI14	A0A0R1XI14_9LACO	Aryl-alcohol dehydrogenase	FC65_GL002183	Lactobacillus acidipiscis DSM 15836	376	40,26	
F7QWT6	F7QWT6_9LACO	GroES-like protein	LSGJ_01784	Lactobacillus salivarius GJ-24	373	40,188	
F7QSY9	F7QSY9_9LACO	Putative alcohol dehydrogenase	LSGJ_00285	Lactobacillus salivarius GJ-24	346	36,698	
R4RK50	R4RK50_LACFE	Alcohol dehydrogenase	LBFF_0867	Lactobacillus fermentum F-6	247	26,279	
R4RZD1	R4RZD1_LACFE	Short-chain alcohol dehydrogenase	LBFF_1948	Lactobacillus fermentum F-6	255	27,748	
R4RYK2	R4RYK2_LACFE	Alcohol dehydrogenase GroES domain protein	LBFF_1684	Lactobacillus fermentum F-6	339	35,783	
R4RN93	R4RN93_LACFE	Alcohol dehydrogenase GroES domain protein	LBFF_2016	Lactobacillus fermentum F-6	337	35,954	
R4RYQ6	R4RYQ6_LACFE	Zinc-binding alcohol dehydrogenase family protein	LBFF_1744	Lactobacillus fermentum F-6	344	36,814	
A0A0R1XAU0	A0A0R1XAU0_9LACO	Alcohol dehydrogenase GroES-like domain protein	FC90_GL000623	Lactobacillus graminis DSM 20719	317	34,151	
A0A0R1X0Y5	A0A0R1X0Y5_9LACO	Zinc-containing alcohol dehydrogenase	FC90_GL001142	Lactobacillus graminis DSM 20719	307	33,13	
R4RY31	R4RY31_LACFE	Alcohol dehydrogenase (NADP(+))	LBFF_1491	Lactobacillus fermentum F-6	350	37,334	
A0A0R1X5U9	A0A0R1X5U9_9LACO	Alcohol dehydrogenase GroES-like domain protein	FC90_GL000826	Lactobacillus graminis DSM 20719	349	36,844	
R4RT33	R4RT33_LACFE	Threonine dehydrogenase related Zn-dependent dehydrogenase	LBFF_1013	Lactobacillus fermentum F-6	350	37,211	
R4RX23	R4RX23_LACFE	Alcohol dehydrogenase GroES domain protein	LBFF_1115	Lactobacillus fermentum F-6	96	10,352	
R4RT89	R4RT89_LACFE	Alcohol dehydrogenase (NADP(+))	LBFF_1063	Lactobacillus fermentum F-6	356	37,81	
R4RX44	R4RX44_LACFE	Alcohol dehydrogenase GroES domain protein	LBFF_1114	Lactobacillus fermentum F-6	205	22,071	
R4RUI5	R4RUI5_LACFE	Alcohol dehydrogenase GroES domain protein	LBFF_0186	Lactobacillus fermentum F-6	346	36,787	
R4RWZ5	R4RWZ5_LACFE	Aryl-alcohol dehydrogenase	adhC LBFF_1039	Lactobacillus fermentum F-6	373	39,77	
A0A0R1X2P5	A0A0R1X2P5_9LACO	Zinc-containing alcohol dehydrogenase(Oxidoreductase)	FC90_GL000625	Lactobacillus graminis DSM 20719	327	35,156	
A0A0R1WTQ8	A0A0R1WTQ8_9LACO	Alcohol dehydrogenase GroES-like domain protein	FC90_GL001655	Lactobacillus graminis DSM 20719	311	33,62	
F9UST5	F9UST5_LACPL	Medium chain dehydrogenases/reductase (MDR)/zinc-dependent alcohol dehydrogenase-like family protein (EC 1.-.-.-)	lp_0111	Lactobacillus plantarum (strain ATCC BAA-793 / NCIMB 8826 / WCFS1)	325	34,082	
F9UUK7	F9UUK7_LACPL	D-arabitol-phosphate dehydrogenase (EC 1.1.1.-)	lp_3545	Lactobacillus plantarum (strain ATCC BAA-793 / NCIMB 8826 / WCFS1)	352	38,206	
F9UP26	F9UP26_LACPL	Alcohol dehydrogenase, zinc-binding (EC 1.-.-.-)	lp_1660	Lactobacillus plantarum (strain ATCC BAA-793 / NCIMB 8826 / WCFS1)	316	34,359	
F9UQP9	F9UQP9_LACPL	Alcohol dehydrogenase, zinc-binding (EC 1.1.1.1)	lp_2346	Lactobacillus plantarum (strain ATCC BAA-793 / NCIMB 8826 / WCFS1)	342	36,096	
F9UPR0	F9UPR0_LACPL	Oxidoreductase, medium chain dehydrogenases/reductase (MDR)/zinc-dependent alcohol dehydrogenase-like family (EC 1.-.-.-)	lp_1939	Lactobacillus plantarum (strain ATCC BAA-793 / NCIMB 8826 / WCFS1)	314	33,587	
F9UP15	F9UP15_LACPL	Alcohol dehydrogenase (EC 1.1.1.-)	lp_1645	Lactobacillus plantarum (strain ATCC BAA-793 / NCIMB 8826 / WCFS1)	156	17,827	
F9USH4	F9USH4_LACPL	Aryl-alcohol dehydrogenase (EC 1.1.1.90)	lp_3054	Lactobacillus plantarum (strain ATCC BAA-793 / NCIMB 8826 / WCFS1)	373	40,018	
F9URX3	F9URX3_LACPL	Alcohol dehydrogenase, zinc-binding (EC 1.1.1.1)	adh2 lp_2873	Lactobacillus plantarum (strain ATCC BAA-793 / NCIMB 8826 / WCFS1)	346	36,692	
F9UP30	F9UP30_LACPL	Alcohol dehydrogenase, zinc-binding (EC 1.1.1.1)	adh1 lp_1665	Lactobacillus plantarum (strain ATCC BAA-793 / NCIMB 8826 / WCFS1)	347	36,71	
F9UNQ7	F9UNQ7_LACPL	Alcohol dehydrogenase, zinc-binding (EC 1.1.1.1)	lp_1521	Lactobacillus plantarum (strain ATCC BAA-793 / NCIMB 8826 / WCFS1)	343	37,659	
F9USR5	F9USR5_LACPL	Medium chain dehydrogenases/reductase (MDR)/zinc-dependent alcohol dehydrogenase-like family protein (EC 1.-.-.-)	lp_0082	Lactobacillus plantarum (strain ATCC BAA-793 / NCIMB 8826 / WCFS1)	334	36,216	
F9UT01	F9UT01_LACPL	Medium chain dehydrogenases/reductase (MDR)/zinc-dependent alcohol dehydrogenase-like family protein (EC 1.-.-.-)	lp_0190	Lactobacillus plantarum (strain ATCC BAA-793 / NCIMB 8826 / WCFS1)	304	32,683	
A0A0R1IGF4	A0A0R1IGF4_9LACO	Short-chain alcohol dehydrogenase	FC73_GL000603	Lactobacillus fructivorans KCTC 3543 = DSM 20203	252	27,303	
A0A0R2A527	A0A0R2A527_9LACO	Ethanol-active dehydrogenase acetaldehyde-active reductase	FC26_GL000878	Lactobacillus vaccinostercus DSM 20634	338	35,574	
A0A0R2A1T0	A0A0R2A1T0_9LACO	Aryl-alcohol dehydrogenase	FC26_GL002355	Lactobacillus vaccinostercus DSM 20634	376	40,319	
A0A0R2A2E1	A0A0R2A2E1_9LACO	Short-chain alcohol dehydrogenase	FC26_GL001836	Lactobacillus vaccinostercus DSM 20634	299	31,826	
A0A0R2A409	A0A0R2A409_9LACO	Aryl-alcohol dehydrogenase	FC26_GL001310	Lactobacillus vaccinostercus DSM 20634	364	38,319	
A0A0R2AAV3	A0A0R2AAV3_9LACO	Alcohol dehydrogenase, iron-dependent	FC26_GL000342	Lactobacillus vaccinostercus DSM 20634	386	41,57	
A0A0R1GTS1	A0A0R1GTS1_9LACO	Short-chain alcohol dehydrogenase	FC62_GL001259	Lactobacillus amylotrophicus DSM 20534	295	31,369	
A0A0R2A4G7	A0A0R2A4G7_9LACO	Short-chain alcohol dehydrogenase	FC26_GL001004	Lactobacillus vaccinostercus DSM 20634	252	26,706	
A0A0R2AFB6	A0A0R2AFB6_9LACO	Alcohol dehydrogenase	FC26_GL002145	Lactobacillus vaccinostercus DSM 20634	345	36,602	
A0A0R2A4U0	A0A0R2A4U0_9LACO	Aryl-alcohol dehydrogenase related enzyme	FC26_GL001846	Lactobacillus vaccinostercus DSM 20634	310	34,221	
A0A0R2A1I7	A0A0R2A1I7_9LACO	Threonine dehydrogenase related Zn-dependent dehydrogenase	FC26_GL000295	Lactobacillus vaccinostercus DSM 20634	346	36,746	
A0A0R2AIM3	A0A0R2AIM3_9LACO	GroES-like protein	FC26_GL001421	Lactobacillus vaccinostercus DSM 20634	362	40,264	
A0A0R2A8B3	A0A0R2A8B3_9LACO	Threonine dehydrogenase related Zn-dependent dehydrogenase	FC26_GL001411	Lactobacillus vaccinostercus DSM 20634	346	36,761	
U4TLG4	U4TLG4_9LACO	Alcohol dehydrogenase-like 6	L248_2392	Lactobacillus shenzhenensis LY-73	306	31,741	
K8Q934	K8Q934_LACRH	Bifunctional protein: zinc-containing alcohol dehydrogenase/ quinone oxidoreductase (NADPH:quinone reductase) (EC 1.1.1.-)	LRHMDP2_2313	Lactobacillus rhamnosus LRHMDP2	305	33,062	
A0A0H0YML7	A0A0H0YML7_LACCA	Alcohol dehydrogenase	AAW28_08110	Lactobacillus casei	361	38,621	
U4TVW2	U4TVW2_9LACO	Zinc-type alcohol dehydrogenase-like protein	L248_2059	Lactobacillus shenzhenensis LY-73	340	37,126	
A0A0R1IDW4	A0A0R1IDW4_9LACO	Alcohol dehydrogenase	FC73_GL001283	Lactobacillus fructivorans KCTC 3543 = DSM 20203	347	37,389	
K8QJG6	K8QJG6_LACRH	Alcohol dehydrogenase (EC 1.1.1.1)	LRHMDP2_217	Lactobacillus rhamnosus LRHMDP2	340	37,025	
K8QAV2	K8QAV2_LACRH	Aryl-alcohol dehydrogenase related enzyme	LRHMDP2_2702	Lactobacillus rhamnosus LRHMDP2	309	34,1	
A0A0H0YLD6	A0A0H0YLD6_LACCA	Aryl-alcohol dehydrogenase	AAW28_09380	Lactobacillus casei	373	39,854	
U4TQE3	U4TQE3_9LACO	XylB	xylB L248_2211	Lactobacillus shenzhenensis LY-73	373	39,917	
A0A0R1ILI7	A0A0R1ILI7_9LACO	Threonine dehydrogenase related Zn-dependent dehydrogenase	FC73_GL000988	Lactobacillus fructivorans KCTC 3543 = DSM 20203	340	37,367	
A0A0H0YJ57	A0A0H0YJ57_LACCA	Alcohol dehydrogenase	AAW28_13175	Lactobacillus casei	340	37,228	
A0A0B8TY03	A0A0B8TY03_LACCA	Butanediol dehydrogenase	IJ11_0213335	Lactobacillus casei	350	37,214	
A0A0B8TTN0	A0A0B8TTN0_LACCA	Molecular chaperone GroES	IJ11_0203785	Lactobacillus casei	346	36,849	
A0A0H0YMH3	A0A0H0YMH3_LACCA	Alcohol dehydrogenase	AAW28_07780	Lactobacillus casei	341	36,753	
A0A0R1INV9	A0A0R1INV9_9LACO	Threonine dehydrogenase related Zn-dependent dehydrogenase	FC73_GL001296	Lactobacillus fructivorans KCTC 3543 = DSM 20203	341	37,373	
A0A0R1IHK8	A0A0R1IHK8_9LACO	Ethanol-active dehydrogenase acetaldehyde-active reductase	FC73_GL000666	Lactobacillus fructivorans KCTC 3543 = DSM 20203	342	36,247	
A0A0R1H3Y2	A0A0R1H3Y2_9LACO	Aryl-alcohol dehydrogenase related enzyme	FC62_GL000135	Lactobacillus amylotrophicus DSM 20534	104	12,247	
A0A0R1IMW8	A0A0R1IMW8_9LACO	Alcohol dehydrogenase, zinc-containing	FC73_GL001300	Lactobacillus fructivorans KCTC 3543 = DSM 20203	338	37,368	
A0A0R1IF22	A0A0R1IF22_9LACO	Sorbitol dehydrogenase	FC73_GL001253	Lactobacillus fructivorans KCTC 3543 = DSM 20203	366	39,672	
K8Q1G7	K8Q1G7_LACRH	Aryl-alcohol dehydrogenase related enzyme	LRHMDP2_2780	Lactobacillus rhamnosus LRHMDP2	334	37,212	
U4TLG0	U4TLG0_9LACO	Alcohol dehydrogenase	L248_2387	Lactobacillus shenzhenensis LY-73	337	36,462	
K8QDW5	K8QDW5_LACRH	Putative sugar dehydrogenase	LRHMDP2_1248	Lactobacillus rhamnosus LRHMDP2	370	40,202	
A0A0R1GWK9	A0A0R1GWK9_9LACO	Alcohol dehydrogenase	FC62_GL000133	Lactobacillus amylotrophicus DSM 20534	344	36,551	
A0A0H0YMY0	A0A0H0YMY0_LACCA	Iditol 2-dehydrogenase	AAW28_08985	Lactobacillus casei	356	38,545	
K8QH64	K8QH64_LACRH	Bifunctional protein: zinc-containing alcohol dehydrogenase/ quinone oxidoreductase (NADPH:quinone reductase) (EC 1.1.1.-)	LRHMDP2_298	Lactobacillus rhamnosus LRHMDP2	304	31,738	
A0A0R1II22	A0A0R1II22_9LACO	Zinc-binding alcohol dehydrogenase family protein	FC73_GL000004	Lactobacillus fructivorans KCTC 3543 = DSM 20203	351	38,232	
A0A0H0YJ86	A0A0H0YJ86_LACCA	Alcohol dehydrogenase	AAW28_13395	Lactobacillus casei	320	34,744	
U4TY38	U4TY38_9LACO	Alcohol dehydrogenase	L248_1344	Lactobacillus shenzhenensis LY-73	310	32,758	
K8QNN2	K8QNN2_LACRH	Alcohol dehydrogenase (EC 1.1.1.1)	LRHMDP2_1305	Lactobacillus rhamnosus LRHMDP2	373	39,795	
K8QLC5	K8QLC5_LACRH	Alcohol dehydrogenase (EC 1.1.1.1)	LRHMDP2_360	Lactobacillus rhamnosus LRHMDP2	319	33,647	
A0A0R1IRL2	A0A0R1IRL2_9LACO	Alcohol dehydrogenase, zinc-binding protein	FC73_GL000617	Lactobacillus fructivorans KCTC 3543 = DSM 20203	346	38,781	
K8QLE3	K8QLE3_LACRH	Alcohol dehydrogenase (EC 1.1.1.1)	LRHMDP2_375	Lactobacillus rhamnosus LRHMDP2	341	36,504	
F3MZT3	F3MZT3_LACRH	Short-chain alcohol dehydrogenase	AAULR_09115	Lactobacillus rhamnosus MTCC 5462	90	9,418	
F3MYG7	F3MYG7_LACRH	Bifunctional acetaldehyde-CoA/alcohol dehydrogenase	AAULR_05548	Lactobacillus rhamnosus MTCC 5462	118	13,009	
F3MXR1	F3MXR1_LACRH	Alcohol dehydrogenase (Fragment)	AAULR_03754	Lactobacillus rhamnosus MTCC 5462	134	14,995	
F2LZK8	F2LZK8_LACAL	Aryl-alcohol dehydrogenase related enzyme	LAB52_05320	Lactobacillus amylovorus (strain GRL 1118)	73	8,074	
F3MYB5	F3MYB5_LACRH	Alcohol dehydrogenase (Fragment)	AAULR_05168	Lactobacillus rhamnosus MTCC 5462	147	15,902	
F3MYG8	F3MYG8_LACRH	Bifunctional acetaldehyde-CoA/alcohol dehydrogenase (Fragment)	AAULR_05568	Lactobacillus rhamnosus MTCC 5462	253	27,853	
F3MXR9	F3MXR9_LACRH	Alcohol dehydrogenase (Fragment)	AAULR_03759	Lactobacillus rhamnosus MTCC 5462	133	14,222	
F3MZT5	F3MZT5_LACRH	Short-chain alcohol dehydrogenase (Fragment)	AAULR_09125	Lactobacillus rhamnosus MTCC 5462	140	15,214	
F3MY95	F3MY95_LACRH	Zinc-binding alcohol dehydrogenase	AAULR_05006	Lactobacillus rhamnosus MTCC 5462	303	31,725	
F3MTR6	F3MTR6_LACRH	Iron-containing alcohol dehydrogenase	AAULR_17094	Lactobacillus rhamnosus MTCC 5462	182	20,11	
F3MW21	F3MW21_LACRH	Alcohol dehydrogenase, iron-containing (Fragment)	AAULR_23801	Lactobacillus rhamnosus MTCC 5462	69	7,581	
F3MW23	F3MW23_LACRH	Alcohol dehydrogenase, iron-containing (Fragment)	AAULR_23806	Lactobacillus rhamnosus MTCC 5462	250	26,511	
A0A0F3RQQ0	A0A0F3RQQ0_9LACO	Alcohol dehydrogenase	VC81_09640	Lactobacillus spicheri	336	36,318	
A0A0F3RTM8	A0A0F3RTM8_9LACO	Aryl-alcohol dehydrogenase	VC81_02340	Lactobacillus spicheri	363	37,874	
A0A0F3RWW9	A0A0F3RWW9_9LACO	Molecular chaperone GroES	VC81_02015	Lactobacillus spicheri	345	36,387	
C0WLX0	C0WLX0_LACBU	Putative chlorophyll synthesis pathway protein BchC (EC 1.1.1.103)	HMPREF0497_0101	Lactobacillus buchneri ATCC 11577	333	35,925	
A0A0F3RTB5	A0A0F3RTB5_9LACO	Aldehyde-alcohol dehydrogenase	VC81_04340	Lactobacillus spicheri	869	94,901	
J3JBU8	J3JBU8_9LACO	Putative zinc-containing alcohol dehydrogenase (Oxidoreductase)	A11Y_170367	Lactobacillus coryniformis subsp. coryniformis CECT 5711	286	30,525	
C0WQ02	C0WQ02_LACBU	Alcohol dehydrogenase, iron-dependent (EC 1.1.1.1)	dhaT HMPREF0497_1205	Lactobacillus buchneri ATCC 11577	389	42,323	
C0WSL5	C0WSL5_LACBU	GroES-like protein (EC 1.1.1.90)	xylB3 HMPREF0497_2118	Lactobacillus buchneri ATCC 11577	373	39,983	
A0A0F3RS96	A0A0F3RS96_9LACO	Uncharacterized protein	VC81_08300	Lactobacillus spicheri	338	35,85	
C0WLV0	C0WLV0_LACBU	Zinc-binding alcohol dehydrogenase family protein	HMPREF0497_0081	Lactobacillus buchneri ATCC 11577	313	34,686	
A0A0F3RTT3	A0A0F3RTT3_9LACO	Alcohol dehydrogenase	VC81_02925	Lactobacillus spicheri	373	40,074	
C0WV28	C0WV28_LACBU	GroES-like protein (EC 1.1.1.4)	HMPREF0497_2981	Lactobacillus buchneri ATCC 11577	360	38,67	
J3ERH1	J3ERH1_9LACO	Putative zinc-containing alcohol dehydrogenase (Oxidoreductase)	A11Y_170871	Lactobacillus coryniformis subsp. coryniformis CECT 5711	329	35,572	
C0WRN1	C0WRN1_LACBU	GroES-like protein (EC 1.1.1.90)	xylB2 HMPREF0497_1809	Lactobacillus buchneri ATCC 11577	377	40,474	
C0WUZ0	C0WUZ0_LACBU	Putative chlorophyll synthesis pathway protein BchC (EC 1.1.1.103)	HMPREF0497_2943	Lactobacillus buchneri ATCC 11577	353	38,281	
A0A0F3RR88	A0A0F3RR88_9LACO	Alcohol dehydrogenase	VC81_08455	Lactobacillus spicheri	336	35,904	
J2ZQM6	J2ZQM6_9LACO	NADPH:quinone reductase	A11Y_113271	Lactobacillus coryniformis subsp. coryniformis CECT 5711	338	36,548	
A0A0F3RXJ9	A0A0F3RXJ9_9LACO	Alcohol dehydrogenase	VC81_03440	Lactobacillus spicheri	338	36,02	
C0WUD2	C0WUD2_LACBU	Zinc-binding alcohol dehydrogenase family protein (EC 1.-.-.-)	adh HMPREF0497_2775	Lactobacillus buchneri ATCC 11577	362	39,161	
J3JB99	J3JB99_9LACO	Iron-containing alcohol dehydrogenase	A11Y_20984	Lactobacillus coryniformis subsp. coryniformis CECT 5711	378	41,12	
J3JAV7	J3JAV7_9LACO	Aryl-alcohol dehydrogenase related enzyme	A11Y_165471	Lactobacillus coryniformis subsp. coryniformis CECT 5711	279	30,849	
C0WRP3	C0WRP3_LACBU	Alcohol dehydrogenase, iron-dependent (EC 1.1.1.1)	HMPREF0497_1821	Lactobacillus buchneri ATCC 11577	289	32,304	
A0A0F3RW25	A0A0F3RW25_9LACO	Alcohol dehydrogenase	VC81_00935	Lactobacillus spicheri	351	37,675	
C0WRF9	C0WRF9_LACBU	GroES-like protein (EC 1.1.1.4)	HMPREF0497_1712	Lactobacillus buchneri ATCC 11577	356	38,468	
C0WLN9	C0WLN9_LACBU	Alcohol dehydrogenase, iron-dependent (EC 1.1.1.1)	gldA HMPREF0497_0042	Lactobacillus buchneri ATCC 11577	372	40,199	
J3ERZ3	J3ERZ3_9LACO	Aryl-alcohol dehydrogenase related enzyme	A11Y_163400	Lactobacillus coryniformis subsp. coryniformis CECT 5711	313	34,183	
C0WU44	C0WU44_LACBU	GroES-like protein (EC 1.1.1.1)	adhA HMPREF0497_2647	Lactobacillus buchneri ATCC 11577	338	36,173	
C0WP78	C0WP78_LACBU	GroES-like protein	HMPREF0497_0931	Lactobacillus buchneri ATCC 11577	346	36,744	
A0A0F3RS40	A0A0F3RS40_9LACO	Aryl-alcohol dehydrogenase	VC81_06940	Lactobacillus spicheri	373	39,836	
A0A0F3RTR9	A0A0F3RTR9_9LACO	Molecular chaperone GroES	VC81_02845	Lactobacillus spicheri	347	36,263	
A0A0F3RS26	A0A0F3RS26_9LACO	Alcohol dehydrogenase	VC81_12350	Lactobacillus spicheri	162	17,93	
Q03U43	Q03U43_LACBA	Short-chain alcohol dehydrogenase	LVIS_0108	Lactobacillus brevis (strain ATCC 367 / JCM 1170)	257	27,751	
Q03R88	Q03R88_LACBA	Short-chain alcohol dehydrogenase	LVIS_1178	Lactobacillus brevis (strain ATCC 367 / JCM 1170)	264	28,838	
A0A0P7HPL8	A0A0P7HPL8_LACPN	23-butanediol dehydrogenase S-alcohol forming (R)-acetoin-specific / Acetoin (Diacetyl) reductase	WJL_2034	Lactobacillus plantarum WJL	256	27,11	
Q03TD1	Q03TD1_LACBA	Short-chain alcohol dehydrogenase	LVIS_0378	Lactobacillus brevis (strain ATCC 367 / JCM 1170)	254	26,286	
Q03TI0	Q03TI0_LACBA	Short-chain alcohol dehydrogenase	LVIS_0326	Lactobacillus brevis (strain ATCC 367 / JCM 1170)	271	29,452	
Q03TF9	Q03TF9_LACBA	Short-chain alcohol dehydrogenase	LVIS_0347	Lactobacillus brevis (strain ATCC 367 / JCM 1170)	252	26,744	
Q03TD6	Q03TD6_LACBA	Short-chain alcohol dehydrogenase	LVIS_0373	Lactobacillus brevis (strain ATCC 367 / JCM 1170)	238	24,794	
Q03S12	Q03S12_LACBA	Threonine dehydrogenase related Zn-dependent dehydrogenase	LVIS_0869	Lactobacillus brevis (strain ATCC 367 / JCM 1170)	346	36,792	
A0A0P7HEQ0	A0A0P7HEQ0_LACPN	Zinc-containing alcohol dehydrogenase quinone oxidoreductase	WJL_0494	Lactobacillus plantarum WJL	325	34,045	
Q03QK1	Q03QK1_LACBA	Aryl-alcohol dehydrogenase related enzyme	LVIS_1423	Lactobacillus brevis (strain ATCC 367 / JCM 1170)	329	36,889	
A0A0P7GP21	A0A0P7GP21_LACPN	Aryl-alcohol dehydrogenase related enzyme	WJL_0518	Lactobacillus plantarum WJL	290	31,891	
A0A0P7ISA5	A0A0P7ISA5_LACPN	Alcohol dehydrogenase	WJL_1681	Lactobacillus plantarum WJL	346	36,692	
A0A0N8I4I6	A0A0N8I4I6_LACPN	Alcohol dehydrogenase Acetaldehyde dehydrogenase	WJL_0684	Lactobacillus plantarum WJL	455	48,677	
A0A0P7IR02	A0A0P7IR02_LACPN	Zinc-containing alcohol dehydrogenase quinone oxidoreductase	WJL_2147	Lactobacillus plantarum WJL	342	36,096	
Q03RX9	Q03RX9_LACBA	Aryl-alcohol dehydrogenase related enzyme	LVIS_0908	Lactobacillus brevis (strain ATCC 367 / JCM 1170)	335	37,3	
A0A0N8I3V6	A0A0N8I3V6_LACPN	Zinc-containing alcohol dehydrogenase quinone oxidoreductase	WJL_3139	Lactobacillus plantarum WJL	314	33,616	
Q03TQ2	Q03TQ2_LACBA	Zn-dependent alcohol dehydrogenase	LVIS_0254	Lactobacillus brevis (strain ATCC 367 / JCM 1170)	336	35,528	
Q03NA1	Q03NA1_LACBA	Aryl-alcohol dehydrogenase related enzyme	LVIS_2273	Lactobacillus brevis (strain ATCC 367 / JCM 1170)	327	35,754	
Q03RM0	Q03RM0_LACBA	Zn-dependent alcohol dehydrogenase	LVIS_1019	Lactobacillus brevis (strain ATCC 367 / JCM 1170)	338	36,035	
A0A0P7I1J9	A0A0P7I1J9_LACPN	Alcohol dehydrogenase	WJL_2900	Lactobacillus plantarum WJL	347	36,754	
Q03U52	Q03U52_LACBA	Aryl-alcohol dehydrogenase related enzyme	LVIS_0099	Lactobacillus brevis (strain ATCC 367 / JCM 1170)	280	30,865	
A0A0P7I4M3	A0A0P7I4M3_LACPN	Alcohol dehydrogenase	WJL_1837	Lactobacillus plantarum WJL	373	40,018	
A0A0P7GN30	A0A0P7GN30_LACPN	Galactitol-1-phosphate 5-dehydrogenase	WJL_0253	Lactobacillus plantarum WJL	369	40,055	
Q03TR0	Q03TR0_LACBA	Uncharacterized paraquat-inducible protein B (Short-chain alcohol dehydrogenase)	LVIS_0246	Lactobacillus brevis (strain ATCC 367 / JCM 1170)	400	43,186	
A0A0P7J234	A0A0P7J234_LACPN	Zinc-containing alcohol dehydrogenase quinone oxidoreductase	WJL_2408	Lactobacillus plantarum WJL	314	33,212	
Q03RX6	Q03RX6_LACBA	Zn-dependent alcohol dehydrogenase	LVIS_0911	Lactobacillus brevis (strain ATCC 367 / JCM 1170)	362	38,567	
A0A0P7GIA3	A0A0P7GIA3_LACPN	Zinc-containing alcohol dehydrogenase quinone oxidoreductase	WJL_2774	Lactobacillus plantarum WJL	343	37,616	
Q03SK2	Q03SK2_LACBA	Aryl-alcohol dehydrogenase related enzyme	LVIS_0677	Lactobacillus brevis (strain ATCC 367 / JCM 1170)	340	38,142	
A0A0P7I5Q0	A0A0P7I5Q0_LACPN	Zinc-containing alcohol dehydrogenase quinone oxidoreductase	WJL_0470	Lactobacillus plantarum WJL	334	36,216	
Q03NK9	Q03NK9_LACBA	Threonine dehydrogenase related Zn-dependent dehydrogenase	LVIS_2162	Lactobacillus brevis (strain ATCC 367 / JCM 1170)	333	35,711	
A0A0R2CRX9	A0A0R2CRX9_9LACO	Alcohol dehydrogenase, propanol-preferring	FC56_GL000657	Lactobacillus senioris DSM 24302 = JCM 17472	339	36,214	
A0A0R2CQU1	A0A0R2CQU1_9LACO	Alcohol dehydrogenase	FC56_GL000434	Lactobacillus senioris DSM 24302 = JCM 17472	349	37,085	
A0A0R2D233	A0A0R2D233_9LACO	Short-chain alcohol dehydrogenase	FC56_GL001230	Lactobacillus senioris DSM 24302 = JCM 17472	297	32,18	
A0A0R2CSU5	A0A0R2CSU5_9LACO	Threonine dehydrogenase related Zn-dependent dehydrogenase	FC56_GL001289	Lactobacillus senioris DSM 24302 = JCM 17472	335	36,043	
A0A0R2CRY4	A0A0R2CRY4_9LACO	Zinc-containing alcohol dehydrogenase(Oxidoreductase)	FC56_GL001313	Lactobacillus senioris DSM 24302 = JCM 17472	330	35,364	
A0A0R2CPW4	A0A0R2CPW4_9LACO	Aryl-alcohol dehydrogenase family enzyme	FC56_GL000939	Lactobacillus senioris DSM 24302 = JCM 17472	329	36,75	
A0A0R1YLI9	A0A0R1YLI9_9LACO	Alcohol dehydrogenase	FC39_GL000213	Lactobacillus hamsteri DSM 5661 = JCM 6256	346	37,206	
S2TC29	S2TC29_LACPA	Short-chain alcohol dehydrogenase (Fragment)	Lpp124_09448	Lactobacillus paracasei subsp. paracasei CNCM I-4649	299	32,684	
A0A0F4LZZ4	A0A0F4LZZ4_9LACO	Short-chain alcohol dehydrogenase	JF73_16400	Lactobacillus helsingborgensis	295	31,449	
A0A0R2LAL4	A0A0R2LAL4_9LACO	Short-chain alcohol dehydrogenase	IV57_GL001129	Lactobacillus kimchiensis	240	25,991	
A0A0R2LAH3	A0A0R2LAH3_9LACO	Short-chain alcohol dehydrogenase	IV57_GL001166	Lactobacillus kimchiensis	264	29,306	
A0A0R2LCT3	A0A0R2LCT3_9LACO	Short-chain alcohol dehydrogenase	IV57_GL000353	Lactobacillus kimchiensis	247	26,425	
A0A0R1YDL4	A0A0R1YDL4_9LACO	L-threonine 3-dehydrogenase	FC39_GL000566	Lactobacillus hamsteri DSM 5661 = JCM 6256	333	36,154	
S2T4N8	S2T4N8_LACPA	Short-chain alcohol dehydrogenase	Lpp124_00650	Lactobacillus paracasei subsp. paracasei CNCM I-4649	277	30,196	
S2SYU3	S2SYU3_LACPA	Short-chain alcohol dehydrogenase	Lpp124_10033	Lactobacillus paracasei subsp. paracasei CNCM I-4649	247	26,809	
A0A0F4M6B2	A0A0F4M6B2_9LACO	Alcohol dehydrogenase GroES domain protein	JF73_02020	Lactobacillus helsingborgensis	344	36,918	
A0A0R1YEZ6	A0A0R1YEZ6_9LACO	Zinc-binding alcohol dehydrogenase family protein	FD47_GL002571	Lactobacillus parafarraginis DSM 18390 = JCM 14109	342	37,536	
A0A0R1YHK6	A0A0R1YHK6_9LACO	Benzyl alcohol dehydrogenase AreB	FD47_GL002468	Lactobacillus parafarraginis DSM 18390 = JCM 14109	375	40,164	
A0A0R2LA40	A0A0R2LA40_9LACO	Aldehyde-alcohol dehydrogenase	IV57_GL001067	Lactobacillus kimchiensis	890	97,122	
S2T3K8	S2T3K8_LACPA	PTS system, mannitol-specific IIC component	Lpp124_00410	Lactobacillus paracasei subsp. paracasei CNCM I-4649	350	38,304	
A0A0R2LDI7	A0A0R2LDI7_9LACO	Alcohol dehydrogenase zinc-binding domain-containing protein	IV57_GL001349	Lactobacillus kimchiensis	318	33,266	
A0A0R2LGT2	A0A0R2LGT2_9LACO	Alcohol dehydrogenase	IV57_GL000055	Lactobacillus kimchiensis	297	32,25	
A0A0F4M6U4	A0A0F4M6U4_9LACO	Alcohol dehydrogenase GroES domain protein	JF73_00680	Lactobacillus helsingborgensis	350	39,066	
A0A0F4LWK0	A0A0F4LWK0_9LACO	Chlorophyll synthesis pathway, bchC	JF73_14570	Lactobacillus helsingborgensis	334	36,774	
A0A0R2LGL5	A0A0R2LGL5_9LACO	Alcohol dehydrogenase	IV57_GL000010	Lactobacillus kimchiensis	345	36,962	
A0A0R1YY96	A0A0R1YY96_9LACO	Zinc-binding alcohol dehydrogenase family protein	FD47_GL001160	Lactobacillus parafarraginis DSM 18390 = JCM 14109	361	38,879	
A0A0R1YR72	A0A0R1YR72_9LACO	GroES-like protein	FD47_GL001885	Lactobacillus parafarraginis DSM 18390 = JCM 14109	333	36,153	
A0A0R2LG69	A0A0R2LG69_9LACO	Alcohol dehydrogenase	IV57_GL000749	Lactobacillus kimchiensis	346	37,004	
A0A0R1Y5L1	A0A0R1Y5L1_9LACO	L-threonine 3-dehydrogenase	FD47_GL000488	Lactobacillus parafarraginis DSM 18390 = JCM 14109	322	34,709	
S2TPI9	S2TPI9_LACPA	PTS system mannitol-specific transporter subunit IIC	Lpp124_06860	Lactobacillus paracasei subsp. paracasei CNCM I-4649	350	38,241	
S2T2R9	S2T2R9_LACPA	Iron-containing alcohol dehydrogenase	Lpp124_11285	Lactobacillus paracasei subsp. paracasei CNCM I-4649	390	43,455	
S2S659	S2S659_LACPA	Putative zinc-type alcohol dehydrogenase-like protein AdhB (Fragment)	Lpp124_13234	Lactobacillus paracasei subsp. paracasei CNCM I-4649	263	27,687	
A0A0R2LKV7	A0A0R2LKV7_9LACO	Alcohol dehydrogenase, zinc-binding protein	IV57_GL000484	Lactobacillus kimchiensis	338	37,362	
A0A0R2LH85	A0A0R2LH85_9LACO	Alcohol dehydrogenase	IV57_GL000127	Lactobacillus kimchiensis	347	36,615	
S2S5P2	S2S5P2_LACPA	Zinc-containing alcohol dehydrogenase superfamily protein	Lpp124_12862	Lactobacillus paracasei subsp. paracasei CNCM I-4649	58	6,311	
A0A0R1YKK6	A0A0R1YKK6_9LACO	Chlorophyll synthesis pathway protein BchC	FD47_GL001880	Lactobacillus parafarraginis DSM 18390 = JCM 14109	334	35,846	
A0A0R1YND4	A0A0R1YND4_9LACO	Alcohol dehydrogenase, propanol-preferring	FD47_GL001097	Lactobacillus parafarraginis DSM 18390 = JCM 14109	342	36,696	
S2T396	S2T396_LACPA	Zinc-type alcohol dehydrogenase-like protein	Lpp124_01764	Lactobacillus paracasei subsp. paracasei CNCM I-4649	340	36,17	
A0A0R1YT45	A0A0R1YT45_9LACO	GroES-like protein	FD47_GL000945	Lactobacillus parafarraginis DSM 18390 = JCM 14109	347	36,643	
A0A0F4M336	A0A0F4M336_9LACO	Aryl-alcohol dehydrogenase related enzyme	JF73_09570	Lactobacillus helsingborgensis	313	35,044	
S2SLG8	S2SLG8_LACPA	Oxidoreductase, zinc-binding dehydrogenase family protein	Lpp124_08188	Lactobacillus paracasei subsp. paracasei CNCM I-4649	347	38,35	
A0A0R2LMN0	A0A0R2LMN0_9LACO	Alcohol dehydrogenase GroES domain protein	IV57_GL000040	Lactobacillus kimchiensis	333	36,39	
A0A0R2B6M3	A0A0R2B6M3_9LACO	Alcohol dehydrogenase	FC34_GL000909	Lactobacillus brantae DSM 23927	329	34,707	
A0A0R2DFA8	A0A0R2DFA8_9LACO	Aryl-alcohol dehydrogenase related enzyme	FD13_GL001717	Lactobacillus senmaizukei DSM 21775 = NBRC 103853	327	35,63	
A0A0R2B5J0	A0A0R2B5J0_9LACO	Short-chain alcohol dehydrogenase	FC34_GL001765	Lactobacillus brantae DSM 23927	271	29,503	
A0A0R2DPZ2	A0A0R2DPZ2_9LACO	Aryl-alcohol dehydrogenase	FD13_GL001994	Lactobacillus senmaizukei DSM 21775 = NBRC 103853	374	39,574	
A0A0R2DDU1	A0A0R2DDU1_9LACO	Alcohol dehydrogenase GroES domain protein	FD13_GL002064	Lactobacillus senmaizukei DSM 21775 = NBRC 103853	345	37,103	
A0A0R2DHI9	A0A0R2DHI9_9LACO	Alcohol dehydrogenase	FD13_GL001607	Lactobacillus senmaizukei DSM 21775 = NBRC 103853	338	35,953	
A0A0R1VYR0	A0A0R1VYR0_9LACO	Aryl-alcohol dehydrogenase	FC15_GL001456	Lactobacillus concavus DSM 17758	151	16,708	
A0A0R2DPR7	A0A0R2DPR7_9LACO	Alcohol dehydrogenase	FD13_GL001977	Lactobacillus senmaizukei DSM 21775 = NBRC 103853	347	36,954	
A0A0R2AXJ1	A0A0R2AXJ1_9LACO	Alcohol dehydrogenase GroES domain-containing protein	FC34_GL001088	Lactobacillus brantae DSM 23927	319	34,055	
A0A0R2B7J8	A0A0R2B7J8_9LACO	Short-chain alcohol dehydrogenase	FC34_GL001532	Lactobacillus brantae DSM 23927	258	27,222	
A0A0R1W2G1	A0A0R1W2G1_9LACO	Aryl-alcohol dehydrogenase family enzyme	FC15_GL001659	Lactobacillus concavus DSM 17758	330	37,415	
A0A0R1W7K2	A0A0R1W7K2_9LACO	Zinc-containing alcohol dehydrogenase (Oxidoreductase)	FC15_GL001152	Lactobacillus concavus DSM 17758	338	36,817	
A0A0R2DEL8	A0A0R2DEL8_9LACO	Aryl-alcohol dehydrogenase related enzyme	FD13_GL001855	Lactobacillus senmaizukei DSM 21775 = NBRC 103853	338	37,526	
A0A0R1VXS0	A0A0R1VXS0_9LACO	Aryl-alcohol dehydrogenase	FC15_GL001455	Lactobacillus concavus DSM 17758	198	22,231	
A0A0R2B6C2	A0A0R2B6C2_9LACO	Zinc-containing alcohol dehydrogenase	FC34_GL001862	Lactobacillus brantae DSM 23927	311	32,588	
A0A0R2DFN4	A0A0R2DFN4_9LACO	Aryl-alcohol dehydrogenase related enzyme	FD13_GL001560	Lactobacillus senmaizukei DSM 21775 = NBRC 103853	320	35,427	
A0A0R2DG99	A0A0R2DG99_9LACO	Threonine dehydrogenase related Zn-dependent dehydrogenase	FD13_GL002038	Lactobacillus senmaizukei DSM 21775 = NBRC 103853	333	35,617	
A0A0R1VUD3	A0A0R1VUD3_9LACO	Short-chain alcohol dehydrogenase	FC15_GL001830	Lactobacillus concavus DSM 17758	368	39,825	
A0A0R2DNM4	A0A0R2DNM4_9LACO	Alcohol dehydrogenase GroES domain protein	FD13_GL001012	Lactobacillus senmaizukei DSM 21775 = NBRC 103853	335	36,403	
A0A0R2DC83	A0A0R2DC83_9LACO	Threonine dehydrogenase related Zn-dependent dehydrogenase	FD13_GL001017	Lactobacillus senmaizukei DSM 21775 = NBRC 103853	346	36,713	
A0A0R2AZC9	A0A0R2AZC9_9LACO	Alcohol dehydrogenase	FC34_GL001133	Lactobacillus brantae DSM 23927	328	34,603	
S4ZP80	S4ZP80_LACCA	Alcohol dehydrogenase	LOCK919_2399	Lactobacillus casei LOCK919	346	36,791	
S4ZL94	S4ZL94_LACCA	Short-chain alcohol dehydrogenase	LOCK919_0564	Lactobacillus casei LOCK919	277	30,196	
A0A0R1NQ14	A0A0R1NQ14_9LACO	Zinc-binding alcohol dehydrogenase family protein	FC98_GL002818	Lactobacillus kisonensis DSM 19906 = JCM 15041	340	37,484	
A0A0R1NTY9	A0A0R1NTY9_9LACO	GroES-like protein	FC98_GL001907	Lactobacillus kisonensis DSM 19906 = JCM 15041	361	40,372	
A0A0R1NWM3	A0A0R1NWM3_9LACO	Chlorophyll synthesis pathway protein BchC	FC98_GL001245	Lactobacillus kisonensis DSM 19906 = JCM 15041	334	36,058	
A0A0R1P228	A0A0R1P228_9LACO	GroES-like protein	FC98_GL001661	Lactobacillus kisonensis DSM 19906 = JCM 15041	346	36,785	
S4ZKD4	S4ZKD4_LACCA	Alcohol dehydrogenase	LOCK919_0826	Lactobacillus casei LOCK919	340	36,24	
A0A0R1NTQ0	A0A0R1NTQ0_9LACO	Benzyl alcohol dehydrogenase AreB	FC98_GL002083	Lactobacillus kisonensis DSM 19906 = JCM 15041	388	41,582	
S4ZT68	S4ZT68_LACCA	Alcohol dehydrogenase GroES-like protein	LOCK919_3018	Lactobacillus casei LOCK919	334	36,636	
A0A0R1NHN7	A0A0R1NHN7_9LACO	Alcohol dehydrogenase, iron-dependent	FC98_GL002051	Lactobacillus kisonensis DSM 19906 = JCM 15041	395	42,879	
S4ZIW0	S4ZIW0_LACCA	Alcohol dehydrogenase	LOCK919_0537	Lactobacillus casei LOCK919	340	37,278	
S4ZJA5	S4ZJA5_LACCA	Bifunctional protein: zinc-containing alcohol dehydrogenase	LOCK919_0745	Lactobacillus casei LOCK919	302	31,41	
A0A0R1NTA2	A0A0R1NTA2_9LACO	Alcohol dehydrogenase, propanol-preferring	FC98_GL000238	Lactobacillus kisonensis DSM 19906 = JCM 15041	338	36,157	
S4ZTE3	S4ZTE3_LACCA	Aryl-alcohol dehydrogenase related enzyme	LOCK919_3088	Lactobacillus casei LOCK919	309	34,035	
S4ZSR5	S4ZSR5_LACCA	Aryl-alcohol dehydrogenase related enzyme	LOCK919_2862	Lactobacillus casei LOCK919	334	37,047	
A0A0R1NXJ3	A0A0R1NXJ3_9LACO	Zinc-binding alcohol dehydrogenase family protein	FC98_GL000889	Lactobacillus kisonensis DSM 19906 = JCM 15041	356	38,696	
S4ZNG7	S4ZNG7_LACCA	Bifunctional protein: zinc-containing alcohol dehydrogenase	LOCK919_1865	Lactobacillus casei LOCK919	322	34,706	
S4ZQQ5	S4ZQQ5_LACCA	Bifunctional protein: zinc-containing alcohol dehydrogenase	LOCK919_3049	Lactobacillus casei LOCK919	345	37,498	
A0A0R2BK50	A0A0R2BK50_9LACO	Aryl-alcohol dehydrogenase family enzyme	FC84_GL000600	Lactobacillus dextrinicus DSM 20335	330	37,108	
S4ZK06	S4ZK06_LACCA	Alcohol dehydrogenase	LOCK919_0807	Lactobacillus casei LOCK919	319	33,377	
A0A0R2BTW1	A0A0R2BTW1_9LACO	Aryl-alcohol dehydrogenase	FC84_GL000086	Lactobacillus dextrinicus DSM 20335	373	40,176	
A0A0R2BJ20	A0A0R2BJ20_9LACO	Zinc-containing alcohol dehydrogenase (Oxidoreductase)	FC84_GL001714	Lactobacillus dextrinicus DSM 20335	341	37,469	
A0A0R2K4V0	A0A0R2K4V0_9LACO	Short-chain alcohol dehydrogenase	IV43_GL001068	Lactobacillus acidipiscis	220	23,412	
A0A0R2JUG1	A0A0R2JUG1_9LACO	Aryl-alcohol dehydrogenase related enzyme	IV43_GL000270	Lactobacillus acidipiscis	306	33,318	
A0A0R2K8J4	A0A0R2K8J4_9LACO	Sorbitol dehydrogenase	IV43_GL001517	Lactobacillus acidipiscis	360	39,34	
A0A0R2JQS7	A0A0R2JQS7_9LACO	Aryl-alcohol dehydrogenase-like protein	IV43_GL000495	Lactobacillus acidipiscis	329	37,134	
A0A0R2K8W4	A0A0R2K8W4_9LACO	Aldehyde-alcohol dehydrogenase	IV43_GL001499	Lactobacillus acidipiscis	893	98,196	
A0A0R2KJ46	A0A0R2KJ46_9LACO	Alcohol dehydrogenase	IV43_GL000529	Lactobacillus acidipiscis	341	36,24	
A0A0R2JZY0	A0A0R2JZY0_9LACO	Zn-dependent alcohol dehydrogenase	IV43_GL002280	Lactobacillus acidipiscis	282	30,302	
A0A0R2KCS0	A0A0R2KCS0_9LACO	L-iditol 2-dehydrogenase	IV43_GL001571	Lactobacillus acidipiscis	354	38,077	
A0A087QF26	A0A087QF26_LACGS	Aldehyde-alcohol dehydrogenase	HMPREF5175_01071	Lactobacillus gasseri SV-16A-US	798	87,613	
A0A087QBV1	A0A087QBV1_LACGS	Alcohol dehydrogenase	HMPREF5175_01582	Lactobacillus gasseri SV-16A-US	279	31,524	
I7LDC8	I7LDC8_9LACO	Alcohol dehydrogenase, zinc-binding	BN53_01505	Lactobacillus pasteurii DSM 23907 = CRBIP 24.76	345	36,645	
I7LD11	I7LD11_9LACO	Aldehyde-alcohol dehydrogenase (EC 1.1.1.1)	BN53_09755	Lactobacillus pasteurii DSM 23907 = CRBIP 24.76	872	95,432	
A0A0R1WF92	A0A0R1WF92_9LACO	Chlorophyll synthesis pathway protein BchC	FC49_GL000669	Lactobacillus oris DSM 4864	337	36,193	
A0A0R1WA86	A0A0R1WA86_9LACO	Alcohol dehydrogenase, propanol-preferring	FC49_GL000956	Lactobacillus oris DSM 4864	340	36,048	
A0A0R1WI58	A0A0R1WI58_9LACO	Zinc-binding alcohol dehydrogenase family protein	FC49_GL000418	Lactobacillus oris DSM 4864	346	37,352	
A0A0R1WJH7	A0A0R1WJH7_9LACO	Aryl-alcohol dehydrogenase	FC49_GL000555	Lactobacillus oris DSM 4864	373	40,001	
A0A0R1WKS8	A0A0R1WKS8_9LACO	Chlorophyll synthesis pathway protein BchC	FC49_GL000944	Lactobacillus oris DSM 4864	339	36,767	
S2NN96	S2NN96_LACPA	Short-chain alcohol dehydrogenase	Lpp74_08261	Lactobacillus paracasei subsp. paracasei Lpp74	277	30,196	
S2NLK9	S2NLK9_LACPA	Short-chain alcohol dehydrogenase	Lpp74_13861	Lactobacillus paracasei subsp. paracasei Lpp74	311	34,058	
S2NTJ3	S2NTJ3_LACPA	Short-chain alcohol dehydrogenase	Lpp74_04364	Lactobacillus paracasei subsp. paracasei Lpp74	247	26,809	
Q38UX5	Q38UX5_LACSS	Putative zinc-containing alcohol dehydrogenase (Oxidoreductase)	LCA_1702	Lactobacillus sakei subsp. sakei (strain 23K)	304	32,233	
S2PAW6	S2PAW6_LACPA	L-iditol 2-dehydrogenase	Lpp74_01274	Lactobacillus paracasei subsp. paracasei Lpp74	356	38,393	
Q38Z17	Q38Z17_LACSS	Putative iron-containing alcohol dehydrogenase (Oxidoreductase)	LCA_0258	Lactobacillus sakei subsp. sakei (strain 23K)	383	41,614	
Q38UF4	Q38UF4_LACSS	Putative zinc-containing alcohol dehydrogenase (Oxidoreductase)	LCA_1875	Lactobacillus sakei subsp. sakei (strain 23K)	313	33,115	
S2PMA0	S2PMA0_LACPA	Zinc-type alcohol dehydrogenase-like protein	Lpp74_00115	Lactobacillus paracasei subsp. paracasei Lpp74	340	36,17	
Q38UJ3	Q38UJ3_LACSS	Putative zinc-containing alcohol dehydrogenase (Oxidoreductase)	LCA_1835	Lactobacillus sakei subsp. sakei (strain 23K)	327	35,783	
Q38VW5	Q38VW5_LACSS	Putative zinc-containing alcohol dehydrogenase (Oxidoreductase)	LCA_1364	Lactobacillus sakei subsp. sakei (strain 23K)	331	35,744	
Q38X54	Q38X54_LACSS	Putative zinc-containg alcohol dehydrogenase (Oxidoreductase)	adh LCA_0925	Lactobacillus sakei subsp. sakei (strain 23K)	346	36,29	
Q38X13	Q38X13_LACSS	Putative Zinc-containing alcohol dehydrogenase (Oxidoreductase)	LCA_0966	Lactobacillus sakei subsp. sakei (strain 23K)	335	36,468	
S2P7V5	S2P7V5_LACPA	Alcohol-acetaldehyde dehydrogenase	Lpp74_04994	Lactobacillus paracasei subsp. paracasei Lpp74	397	43,233	
Q38WX3	Q38WX3_LACSS	Putative zinc-containing alcohol dehydrogenase (Oxidoreductase)	LCA_1006	Lactobacillus sakei subsp. sakei (strain 23K)	343	38,417	
S2PIJ9	S2PIJ9_LACPA	Putative zinc-type alcohol dehydrogenase-like protein AdhB	Lpp74_05274	Lactobacillus paracasei subsp. paracasei Lpp74	346	36,875	
Q38UJ6	Q38UJ6_LACSS	Putative zinc-containing alcohol dehydrogenase (Oxidoreductase)	LCA_1832	Lactobacillus sakei subsp. sakei (strain 23K)	317	34,336	
Q38VT5	Q38VT5_LACSS	Putative zinc-containing alcohol dehydrogenase (Oxidoreductase)	LCA_1395	Lactobacillus sakei subsp. sakei (strain 23K)	311	33,635	
Q38Y86	Q38Y86_LACSS	Aryl-alcohol dehydrogenase (EC 1.1.1.90)	LCA_0542	Lactobacillus sakei subsp. sakei (strain 23K)	372	39,865	
A0A0R1L5T0	A0A0R1L5T0_9LACO	Short-chain alcohol dehydrogenase	FC88_GL001410	Lactobacillus futsaii JCM 17355	240	26,088	
A0A081KW13	A0A081KW13_LACRE	Alcohol dehydrogenase	HQ33_00395	Lactobacillus reuteri	328	35,006	
A0A098QXL6	A0A098QXL6_LACRE	Aryl-alcohol dehydrogenase	HN00_02160	Lactobacillus reuteri	368	39,059	
A0A0R1XRA4	A0A0R1XRA4_9LACO	Adh protein	FC44_GL001589	Lactobacillus intestinalis DSM 6629	113	12,236	
A0A073JM04	A0A073JM04_LACRE	Molecular chaperone GroES	LR3_03895	Lactobacillus reuteri	351	37,702	
A0A0R1Y1M3	A0A0R1Y1M3_9LACO	Aryl-alcohol dehydrogenase	FC44_GL000706	Lactobacillus intestinalis DSM 6629	215	23,059	
A0A081NSU5	A0A081NSU5_LACRE	Molecular chaperone GroES	HF82_10220	Lactobacillus reuteri	351	37,572	
A0A073JP85	A0A073JP85_LACRE	Alcohol dehydrogenase	LR3_04510	Lactobacillus reuteri	227	24,181	
A0A0R1LTT2	A0A0R1LTT2_9LACO	Alcohol dehydrogenase	FC88_GL002166	Lactobacillus futsaii JCM 17355	348	36,961	
A0A098QYI9	A0A098QYI9_LACRE	Alcohol dehydrogenase	HN00_07475	Lactobacillus reuteri	328	34,963	
A0A0R1LQQ2	A0A0R1LQQ2_9LACO	Alcohol dehydrogenase, zinc-binding protein	FC88_GL000283	Lactobacillus futsaii JCM 17355	337	37,628	
A0A079YU80	A0A079YU80_LACRE	Molecular chaperone GroES	HQ33_05355	Lactobacillus reuteri	351	37,549	
A0A098QSN1	A0A098QSN1_LACRE	Alcohol dehydrogenase	HN00_08120	Lactobacillus reuteri	342	36,158	
A0A0R1LD00	A0A0R1LD00_9LACO	Alcohol dehydrogenase	FC88_GL001531	Lactobacillus futsaii JCM 17355	328	35,216	
A0A098QRJ8	A0A098QRJ8_LACRE	Alcohol dehydrogenase	HN00_06305	Lactobacillus reuteri	336	35,988	
A0A081NPN2	A0A081NPN2_LACRE	Alcohol dehydrogenase	HF82_00280	Lactobacillus reuteri	383	41,676	
A0A081NNL7	A0A081NNL7_LACRE	Alcohol dehydrogenase	HF82_04345	Lactobacillus reuteri	227	24,129	
A0A0R1XZJ9	A0A0R1XZJ9_9LACO	Alcohol dehydrogenase, zinc-binding	FC44_GL000350	Lactobacillus intestinalis DSM 6629	341	38,229	
A0A098QW95	A0A098QW95_LACRE	Alcohol dehydrogenase	HN00_03075	Lactobacillus reuteri	340	37,516	
A0A0R1L599	A0A0R1L599_9LACO	Zinc-containing alcohol dehydrogenase superfamily protein	FC88_GL001737	Lactobacillus futsaii JCM 17355	317	34,863	
A0A0R1LFV5	A0A0R1LFV5_9LACO	Aryl-alcohol dehydrogenase	FC88_GL001170	Lactobacillus futsaii JCM 17355	373	39,744	
A0A098QRQ0	A0A098QRQ0_LACRE	Alcohol dehydrogenase	HN00_04830	Lactobacillus reuteri	348	37,821	
A0A081NPA9	A0A081NPA9_LACRE	Alcohol dehydrogenase	HF82_09965	Lactobacillus reuteri	340	37,494	
C0XHZ5	C0XHZ5_LACHI	Zinc-binding alcohol dehydrogenase family protein	HMPREF0519_0856	Lactobacillus hilgardii DSM 20176 = ATCC 8290	340	37,648	
C0XNG7	C0XNG7_LACHI	Alcohol dehydrogenase, iron-dependent (EC 1.1.1.1)	dhaT HMPREF0519_2778	Lactobacillus hilgardii DSM 20176 = ATCC 8290	389	42,371	
A0A0R2ERU7	A0A0R2ERU7_9LACO	Alcohol dehydrogenase	FC75_GL000842	Lactobacillus camelliae DSM 22697 = JCM 13995	345	36,54	
A0A0R2F1S7	A0A0R2F1S7_9LACO	Aryl-alcohol dehydrogenase related enzyme	FC75_GL000518	Lactobacillus camelliae DSM 22697 = JCM 13995	283	31,326	
A0A0R2FAC1	A0A0R2FAC1_9LACO	Zn-dependent alcohol dehydrogenase	FC75_GL000676	Lactobacillus camelliae DSM 22697 = JCM 13995	373	40,01	
A0A0R2F8E3	A0A0R2F8E3_9LACO	L-threonine 3-dehydrogenase	FC75_GL001231	Lactobacillus camelliae DSM 22697 = JCM 13995	332	35,554	
A0A0R2EQS5	A0A0R2EQS5_9LACO	Alcohol dehydrogenase	FC75_GL000589	Lactobacillus camelliae DSM 22697 = JCM 13995	341	35,873	
C0XHW4	C0XHW4_LACHI	Alcohol dehydrogenase, iron-dependent (EC 1.1.1.1)	gldA HMPREF0519_0825	Lactobacillus hilgardii DSM 20176 = ATCC 8290	372	40,198	
A0A0R2FGN2	A0A0R2FGN2_9LACO	Threonine dehydrogenase related Zn-dependent dehydrogenase	FC75_GL000925	Lactobacillus camelliae DSM 22697 = JCM 13995	348	36,971	
C0XMP6	C0XMP6_LACHI	Zinc-binding alcohol dehydrogenase family protein (EC 1.-.-.-)	adh HMPREF0519_2507	Lactobacillus hilgardii DSM 20176 = ATCC 8290	362	39,16	
A0A0R2F7N7	A0A0R2F7N7_9LACO	Aryl-alcohol dehydrogenase related enzyme	FC75_GL002351	Lactobacillus camelliae DSM 22697 = JCM 13995	317	35,214	
C0XMB6	C0XMB6_LACHI	GroES-like protein (EC 1.1.1.1)	adhA HMPREF0519_2377	Lactobacillus hilgardii DSM 20176 = ATCC 8290	338	36,145	
A0A0R2FAS5	A0A0R2FAS5_9LACO	Iron-containing alcohol dehydrogenase	FC75_GL000388	Lactobacillus camelliae DSM 22697 = JCM 13995	392	42,175	
A0A0R2ETE1	A0A0R2ETE1_9LACO	Alcohol dehydrogenase zinc-binding domain-containing protein	FC75_GL000511	Lactobacillus camelliae DSM 22697 = JCM 13995	325	34,213	
C0XGF1	C0XGF1_LACHI	Aldehyde dehydrogenase (NAD) family protein (EC 1.2.1.-)	adh2 HMPREF0519_0312	Lactobacillus hilgardii DSM 20176 = ATCC 8290	872	95,001	
C0XL10	C0XL10_LACHI	GroES-like protein (EC 1.1.1.90)	HMPREF0519_1921	Lactobacillus hilgardii DSM 20176 = ATCC 8290	373	40,014	
A0A0R2EQY9	A0A0R2EQY9_9LACO	Alcohol dehydrogenase GroES domain-containing protein	FC75_GL000448	Lactobacillus camelliae DSM 22697 = JCM 13995	317	33,95	
A0A0F4LVY3	A0A0F4LVY3_9LACO	Aryl-alcohol dehydrogenase related enzyme	JG30_02340	Lactobacillus mellifer	313	35,01	
A0A0F4LX78	A0A0F4LX78_9LACO	Putative alcohol dehydrogenase	JG30_01180	Lactobacillus mellifer	347	38,106	
A0A0F4LNQ6	A0A0F4LNQ6_9LACO	Putative Chlorophyll synthesis pathway, BchC	JG30_15810	Lactobacillus mellifer	359	39,279	
C0XG96	C0XG96_LACHI	GroES-like protein (Fragment)	HMPREF0519_0257	Lactobacillus hilgardii DSM 20176 = ATCC 8290	80	8,726	
A0A0F4LYH0	A0A0F4LYH0_9LACO	Zinc-binding dehydrogenase	JG30_00440	Lactobacillus mellifer	353	38,37	
A0A0F4LQ51	A0A0F4LQ51_9LACO	Putative Zinc-binding alcohol dehydrogenase	JG30_15670	Lactobacillus mellifer	357	38,465	
A0A0F4LX71	A0A0F4LX71_9LACO	Xylitol-phosphate dehydrogenase	JG30_00470	Lactobacillus mellifer	352	38,432	
A0A0F4LTT3	A0A0F4LTT3_9LACO	Alcohol dehydrogenase	JG30_07580	Lactobacillus mellifer	354	38,969	
A0A0F4LT32	A0A0F4LT32_9LACO	Alcohol dehydrogenase, MDR family	JG30_14150	Lactobacillus mellifer	339	36,865	
A0A0F4LSZ1	A0A0F4LSZ1_9LACO	Alcohol dehydrogenase	JG30_07590	Lactobacillus mellifer	359	39,578	
R5ZD09	R5ZD09_9LACO	Aryl-alcohol dehydrogenase	BN764_00561	Lactobacillus amylovorus CAG:719	335	36,324	
A0A0F4LQA6	A0A0F4LQA6_9LACO	Alcohol dehydrogenase	JG30_15960	Lactobacillus mellifer	350	38,237	
R5ZGN5	R5ZGN5_9LACO	Aldehyde-alcohol dehydrogenase	BN764_01816	Lactobacillus amylovorus CAG:719	875	96,053	
A0A0F4LPM1	A0A0F4LPM1_9LACO	Aldehyde-alcohol dehydrogenase	JG30_14670	Lactobacillus mellifer	886	97,125	
A0A0F4LUM4	A0A0F4LUM4_9LACO	GroES-like protein	JG30_05430	Lactobacillus mellifer	346	37,282	
R5YGI4	R5YGI4_9LACO	Aryl-alcohol dehydrogenase related enzyme	BN764_00441	Lactobacillus amylovorus CAG:719	73	8,076	
A0A0R2LC06	A0A0R2LC06_9LACO	Alcohol dehydrogenase zinc-binding domain-containing protein	IV55_GL000182	Lactobacillus siliginis	230	24,279	
C2ETA3	C2ETA3_9LACO	Aldehyde dehydrogenase (NAD) family protein (EC 1.2.1.-)	adh2 HMPREF0549_0689	Lactobacillus vaginalis DSM 5837 = ATCC 49540	876	96,856	
C2EV83	C2EV83_9LACO	GroES-like protein (EC 1.1.1.1)	adhA1 HMPREF0549_1369	Lactobacillus vaginalis DSM 5837 = ATCC 49540	340	35,924	
S2PIU1	S2PIU1_LACPA	Short-chain alcohol dehydrogenase	Lpp7_05436	Lactobacillus paracasei subsp. paracasei Lpp7	311	34,102	
A0A0R2L110	A0A0R2L110_9LACO	Short-chain alcohol dehydrogenase	IV55_GL001941	Lactobacillus siliginis	263	28,883	
C2ESV7	C2ESV7_9LACO	GroES-like protein (EC 1.1.1.90)	xylB2 HMPREF0549_0543	Lactobacillus vaginalis DSM 5837 = ATCC 49540	363	38,99	
C2EV43	C2EV43_9LACO	Zinc-binding alcohol dehydrogenase family protein (EC 1.-.-.-)	adh HMPREF0549_1329	Lactobacillus vaginalis DSM 5837 = ATCC 49540	347	37,81	
A0A0R2KXC1	A0A0R2KXC1_9LACO	Nadph dependent r-specific alcohol dehydrogenase	IV55_GL000642	Lactobacillus siliginis	252	26,87	
A0A0R2L500	A0A0R2L500_9LACO	Alcohol dehydrogenase GroES domain protein	IV55_GL000665	Lactobacillus siliginis	340	35,86	
C2EWI4	C2EWI4_9LACO	GroES-like protein (EC 1.1.1.1)	adhA2 HMPREF0549_1820	Lactobacillus vaginalis DSM 5837 = ATCC 49540	341	36,068	
S2PLP2	S2PLP2_LACPA	Short-chain alcohol dehydrogenase	Lpp7_05921	Lactobacillus paracasei subsp. paracasei Lpp7	277	30,196	
C2EU91	C2EU91_9LACO	GroES-like protein (EC 1.1.1.90)	xylB1 HMPREF0549_1027	Lactobacillus vaginalis DSM 5837 = ATCC 49540	373	40,031	
A0A0R2L5B2	A0A0R2L5B2_9LACO	Alcohol dehydrogenase	IV55_GL001238	Lactobacillus siliginis	345	36,694	
A0A0R2L3V7	A0A0R2L3V7_9LACO	Aldehyde-alcohol dehydrogenase	IV55_GL001463	Lactobacillus siliginis	881	96,095	
A0A0R2KYE0	A0A0R2KYE0_9LACO	Short-chain alcohol dehydrogenase	IV55_GL000525	Lactobacillus siliginis	343	37,817	
A0A0M9DDW0	A0A0M9DDW0_9LACO	NADH-dependent (S)-specific alcohol dehydrogenase	RZ71_09690	Lactobacillus kunkeei	346	36,994	
A0A095ABY6	A0A095ABY6_LACSK	Alcohol dehydrogenase	KY41_06940	Lactobacillus sakei	313	33,223	
A0A0M9DC93	A0A0M9DC93_9LACO	NADH-dependent (S)-specific alcohol dehydrogenase	RZ70_04940	Lactobacillus kunkeei	346	36,923	
A0A094YXK5	A0A094YXK5_LACSK	Aldehyde-alcohol dehydrogenase	KY41_01840	Lactobacillus sakei	848	91,807	
A0A0N8IGM4	A0A0N8IGM4_9LACO	Sorbitol dehydrogenase	RZ56_08940	Lactobacillus kunkeei	333	35,926	
A0A0M9D961	A0A0M9D961_9LACO	NADH-dependent (S)-specific alcohol dehydrogenase	RZ55_05920	Lactobacillus kunkeei	346	37,022	
S2Q1G9	S2Q1G9_LACPA	Zinc-type alcohol dehydrogenase-like protein	Lpp7_06053	Lactobacillus paracasei subsp. paracasei Lpp7	340	36,151	
A0A0P7KAD7	A0A0P7KAD7_9LACO	NADH-dependent (S)-specific alcohol dehydrogenase	RZ78_05050	Lactobacillus kunkeei	346	37,008	
C2EUI7	C2EUI7_9LACO	Putative chlorophyll synthesis pathway protein BchC (EC 1.1.1.103)	HMPREF0549_1123	Lactobacillus vaginalis DSM 5837 = ATCC 49540	337	36,117	
A0A0M9D647	A0A0M9D647_9LACO	NADH-dependent (S)-specific alcohol dehydrogenase	RZ73_01240	Lactobacillus kunkeei	346	36,984	
C2ERC7	C2ERC7_9LACO	Putative chlorophyll synthesis pathway protein BchC (EC 1.1.1.103)	HMPREF0549_0015	Lactobacillus vaginalis DSM 5837 = ATCC 49540	339	37,003	
A0A094YY40	A0A094YY40_LACSK	Alcohol dehydrogenase	KY41_00590	Lactobacillus sakei	311	33,612	
A0A0M9D708	A0A0M9D708_9LACO	Zinc-containing alcohol dehydrogenase	RZ73_04110	Lactobacillus kunkeei	320	34,945	
A0A0P7IXL5	A0A0P7IXL5_9LACO	Zinc-containing alcohol dehydrogenase	RZ56_06870	Lactobacillus kunkeei	320	34,772	
S2Q6K4	S2Q6K4_LACPA	Alcohol dehydrogenase	Lpp7_10363	Lactobacillus paracasei subsp. paracasei Lpp7	282	29,943	
S2Q7A1	S2Q7A1_LACPA	Alcohol-acetaldehyde dehydrogenase	Lpp7_09963	Lactobacillus paracasei subsp. paracasei Lpp7	397	43,126	
A0A094XYI5	A0A094XYI5_LACSK	Alcohol dehydrogenase	KY41_09365	Lactobacillus sakei	383	41,58	
A0A094YVX3	A0A094YVX3_LACSK	Aryl-alcohol dehydrogenase	KY41_05115	Lactobacillus sakei	372	39,803	
A0A094XZG1	A0A094XZG1_LACSK	Molecular chaperone GroES	KY41_07290	Lactobacillus sakei	346	36,382	
A0A0P7LS53	A0A0P7LS53_9LACO	Zn-dependent alcohol dehydrogenase	RZ78_06480	Lactobacillus kunkeei	338	36,223	
A0A0P7K8I0	A0A0P7K8I0_9LACO	NADH-dependent (S)-specific alcohol dehydrogenase	RZ76_06130	Lactobacillus kunkeei	346	36,974	
A0A0R1HPP0	A0A0R1HPP0_9LACO	Short-chain alcohol dehydrogenase	FC96_GL001527	Lactobacillus kimchicus JCM 15530	297	31,5	
A0A0R1HVF3	A0A0R1HVF3_9LACO	Short-chain alcohol dehydrogenase	FC96_GL001658	Lactobacillus kimchicus JCM 15530	253	26,62	
A0A0R1HUA9	A0A0R1HUA9_9LACO	Alcohol dehydrogenase	FC96_GL000866	Lactobacillus kimchicus JCM 15530	347	36,568	
A0A0R1HN59	A0A0R1HN59_9LACO	NADH-dependent (S)-specific alcohol dehydrogenase	FC96_GL002053	Lactobacillus kimchicus JCM 15530	354	37,786	
A0A0R1HQ68	A0A0R1HQ68_9LACO	L-threonine 3-dehydrogenase	FC96_GL001687	Lactobacillus kimchicus JCM 15530	333	35,777	
A0A0R1HRH1	A0A0R1HRH1_9LACO	Ethanol-active dehydrogenase acetaldehyde-active reductase	FC96_GL000153	Lactobacillus kimchicus JCM 15530	339	36,074	
A0A0R1HLC3	A0A0R1HLC3_9LACO	Zinc-binding alcohol dehydrogenase family protein	FC96_GL000716	Lactobacillus kimchicus JCM 15530	352	38,004	
A0A0R1HUW5	A0A0R1HUW5_9LACO	Benzyl alcohol dehydrogenase	FC96_GL001439	Lactobacillus kimchicus JCM 15530	381	40,018	
A0A0R1HP75	A0A0R1HP75_9LACO	Aryl-alcohol dehydrogenase	FC96_GL001554	Lactobacillus kimchicus JCM 15530	383	40,79	
A0A0R1HS58	A0A0R1HS58_9LACO	Aryl-alcohol dehydrogenase related enzyme	FC96_GL000569	Lactobacillus kimchicus JCM 15530	341	37,113	
H7FWR5	H7FWR5_9LACO	Alcohol dehydrogenase	SMXD51_00115	Lactobacillus salivarius SMXD51	346	36,536	
H7G175	H7G175_9LACO	Aryl-alcohol dehydrogenase	SMXD51_08999	Lactobacillus salivarius SMXD51	373	40,188	
A0A0N7CKW8	A0A0N7CKW8_LACFE	Alcohol dehydrogenase	N573_009960	Lactobacillus fermentum 3872	336	35,87	
A0A0N7CMG6	A0A0N7CMG6_LACFE	Alcohol dehydrogenase	N573_009655	Lactobacillus fermentum 3872	339	35,783	
A0A0N7CJJ9	A0A0N7CJJ9_LACFE	Molecular chaperone GroES	N573_001070	Lactobacillus fermentum 3872	346	36,757	
A0A0N7CJN4	A0A0N7CJN4_LACFE	Alcohol dehydrogenase	N573_008565	Lactobacillus fermentum 3872	356	37,904	
A0A0N7CP74	A0A0N7CP74_LACFE	Butanediol dehydrogenase	N573_006025	Lactobacillus fermentum 3872	350	37,197	
A0A0N7CP93	A0A0N7CP93_LACFE	Alcohol dehydrogenase	N573_006220	Lactobacillus fermentum 3872	356	37,83	
D8FRI9	D8FRI9_LACDE	GroES-like protein	HMPREF9264_0670	Lactobacillus delbrueckii subsp. bulgaricus PB2003/044-T3-4	344	36,62	
D8FQN0	D8FQN0_LACDE	GroES-like protein	HMPREF9264_1236	Lactobacillus delbrueckii subsp. bulgaricus PB2003/044-T3-4	347	36,775	
A0A0R1YU86	A0A0R1YU86_9LACO	Nadph dependent r-specific alcohol dehydrogenase	FC51_GL000553	Lactobacillus parabuchneri DSM 5707 = NBRC 107865	252	26,775	
K0N2G1	K0N2G1_LACCA	Rhamnulose-1-phosphate aldolase/alcohol dehydrogenase	BN194_05460	Lactobacillus casei W56	166	17,995	
K0MXB6	K0MXB6_LACCA	Uncharacterized zinc-type alcohol dehydrogenase-like protein AdhB (EC 1.-.-.-)	adhB BN194_23590	Lactobacillus casei W56	346	36,875	
A0A0R1YY74	A0A0R1YY74_9LACO	Short-chain alcohol dehydrogenase	FC51_GL000948	Lactobacillus parabuchneri DSM 5707 = NBRC 107865	253	26,857	
A0A0R1YXL3	A0A0R1YXL3_9LACO	Iron-containing alcohol dehydrogenase	FC51_GL001465	Lactobacillus parabuchneri DSM 5707 = NBRC 107865	367	39,514	
A0A0R1Z5N3	A0A0R1Z5N3_9LACO	Alcohol dehydrogenase	FC51_GL001481	Lactobacillus parabuchneri DSM 5707 = NBRC 107865	349	37,261	
K0N864	K0N864_LACCA	PTS system, mannitol-specific IIC component	BN194_28610	Lactobacillus casei W56	356	39,052	
A0A0R1YXM4	A0A0R1YXM4_9LACO	L-threonine 3-dehydrogenase	FC51_GL000993	Lactobacillus parabuchneri DSM 5707 = NBRC 107865	333	35,876	
A0A0R2FUC6	A0A0R2FUC6_9LACO	Alcohol dehydrogenase, zinc-binding protein	IV36_GL000412	Lactobacillus mali	342	38,052	
K0N881	K0N881_LACCA	Oxidoreductase, zinc-binding dehydrogenase family	BN194_28810	Lactobacillus casei W56	362	40,069	
A0A0R1YZ08	A0A0R1YZ08_9LACO	Alcohol dehydrogenase GroES domain-containing protein	FC51_GL000418	Lactobacillus parabuchneri DSM 5707 = NBRC 107865	338	36,215	
A0A0R2FN01	A0A0R2FN01_9LACO	Aldehyde-alcohol dehydrogenase	IV36_GL000287	Lactobacillus mali	896	98,071	
K0N8C0	K0N8C0_LACCA	Zinc-type alcohol dehydrogenase-like protein MW2112	BN194_05170	Lactobacillus casei W56	393	43,491	
A0A0R1YZ49	A0A0R1YZ49_9LACO	Aryl-alcohol dehydrogenase	FC51_GL000040	Lactobacillus parabuchneri DSM 5707 = NBRC 107865	373	39,91	
A0A0R1YUY1	A0A0R1YUY1_9LACO	L-iditol 2-dehydrogenase	FC51_GL002260	Lactobacillus parabuchneri DSM 5707 = NBRC 107865	356	38,413	
A0A0R2FQ52	A0A0R2FQ52_9LACO	Aryl-alcohol dehydrogenase related enzyme	IV36_GL001524	Lactobacillus mali	316	35,033	
K0N329	K0N329_LACCA	Zinc-type alcohol dehydrogenase-like protein SE_1777	BN194_07910	Lactobacillus casei W56	378	40,831	
A0A0R2FS00	A0A0R2FS00_9LACO	Aryl-alcohol dehydrogenase related enzyme	IV36_GL001005	Lactobacillus mali	279	31,173	
A0A0R1YVU3	A0A0R1YVU3_9LACO	Zinc-binding alcohol dehydrogenase family protein	FC51_GL001984	Lactobacillus parabuchneri DSM 5707 = NBRC 107865	356	38,596	
A0A0R1YV87	A0A0R1YV87_9LACO	Alcohol dehydrogenase zinc-binding domain-containing protein	FC51_GL002040	Lactobacillus parabuchneri DSM 5707 = NBRC 107865	323	35,246	
A0A0R2FFA4	A0A0R2FFA4_9LACO	Alcohol dehydrogenase	IV36_GL001105	Lactobacillus mali	336	37,4	
A0A0R1YR01	A0A0R1YR01_9LACO	Aryl-alcohol dehydrogenase	FC51_GL001298	Lactobacillus parabuchneri DSM 5707 = NBRC 107865	313	33,936	
A0A0R1Z8C3	A0A0R1Z8C3_9LACO	Alcohol dehydrogenase zinc-binding domain-containing protein	FC51_GL001065	Lactobacillus parabuchneri DSM 5707 = NBRC 107865	305	32,35	
A0A0R2G7H7	A0A0R2G7H7_9LACO	L-iditol 2-dehydrogenase	IV36_GL000915	Lactobacillus mali	360	38,905	
A0A0R1EQC8	A0A0R1EQC8_LACZE	Short-chain alcohol dehydrogenase	FD51_GL001123	Lactobacillus zeae DSM 20178 = KCTC 3804	291	31,956	
A0A0R1EZ51	A0A0R1EZ51_LACZE	Short-chain alcohol dehydrogenase	FD51_GL002708	Lactobacillus zeae DSM 20178 = KCTC 3804	311	34,321	
A0A0R1EQD1	A0A0R1EQD1_LACZE	Alcohol dehydrogenase	FD51_GL001137	Lactobacillus zeae DSM 20178 = KCTC 3804	340	37,227	
A0A0R1ERD3	A0A0R1ERD3_LACZE	Sorbitol dehydrogenase	FD51_GL002289	Lactobacillus zeae DSM 20178 = KCTC 3804	345	38,068	
A0A0R1EVC5	A0A0R1EVC5_LACZE	Aryl-alcohol dehydrogenase-like protein	FD51_GL001347	Lactobacillus zeae DSM 20178 = KCTC 3804	309	33,997	
A0A0R1ETE0	A0A0R1ETE0_LACZE	Alcohol dehydrogenase	FD51_GL002532	Lactobacillus zeae DSM 20178 = KCTC 3804	343	36,622	
A0A0R1EIX2	A0A0R1EIX2_LACZE	L-iditol 2-dehydrogenase	FD51_GL002290	Lactobacillus zeae DSM 20178 = KCTC 3804	360	39,139	
A0A0R1EX69	A0A0R1EX69_LACZE	Aryl-alcohol dehydrogenase	FD51_GL001084	Lactobacillus zeae DSM 20178 = KCTC 3804	373	39,84	
A0A0R1ERQ4	A0A0R1ERQ4_LACZE	Iron-containing alcohol dehydrogenase	FD51_GL000639	Lactobacillus zeae DSM 20178 = KCTC 3804	435	48,005	
A0A0R1EV53	A0A0R1EV53_LACZE	Alcohol dehydrogenase, iron-containing	FD51_GL001420	Lactobacillus zeae DSM 20178 = KCTC 3804	361	38,581	
S2PUH7	S2PUH7_LACPA	Short-chain alcohol dehydrogenase	Lpp77_03282	Lactobacillus paracasei subsp. paracasei CNCM I-4270	311	34,162	
A0A0R1ETP0	A0A0R1ETP0_LACZE	Zinc-binding alcohol dehydrogenase	FD51_GL002550	Lactobacillus zeae DSM 20178 = KCTC 3804	319	34,001	
S2PQS2	S2PQS2_LACPA	Short-chain alcohol dehydrogenase	Lpp77_04303	Lactobacillus paracasei subsp. paracasei CNCM I-4270	277	30,196	
S2PTA6	S2PTA6_LACPA	L-iditol 2-dehydrogenase	Lpp77_15071	Lactobacillus paracasei subsp. paracasei CNCM I-4270	356	38,423	
S2PH10	S2PH10_LACPA	Zinc-containing alcohol dehydrogenase superfamily protein	Lpp77_11666	Lactobacillus paracasei subsp. paracasei CNCM I-4270	58	6,311	
D1YGT3	D1YGT3_LACGS	Alcohol dehydrogenase, iron-dependent (EC 1.1.1.1)	HMPREF9209_0195	Lactobacillus gasseri 224-1	798	87,613	
S2PM01	S2PM01_LACPA	Zinc-type alcohol dehydrogenase-like protein (Fragment)	Lpp77_08195	Lactobacillus paracasei subsp. paracasei CNCM I-4270	159	17,556	
E4SWP3	E4SWP3_LACDN	Iron-binding alcohol dehydrogenase and aldehyde dehydrogenase family enzyme	LDBND_1598	Lactobacillus delbrueckii subsp. bulgaricus (strain ND02)	464	50,3	
E4SUN4	E4SUN4_LACDN	Alcohol dehydrogenase GroES domain protein	LDBND_0019	Lactobacillus delbrueckii subsp. bulgaricus (strain ND02)	311	33,883	
E4SZM2	E4SZM2_LACDN	Threonine dehydrogenase related Zn-dependent dehydrogenase	LDBND_0967	Lactobacillus delbrueckii subsp. bulgaricus (strain ND02)	344	36,619	
S2PCK5	S2PCK5_LACPA	Alcohol dehydrogenase	Lpp77_15777	Lactobacillus paracasei subsp. paracasei CNCM I-4270	334	36,65	
S2PPH7	S2PPH7_LACPA	Alcohol-acetaldehyde dehydrogenase (Fragment)	Lpp77_05384	Lactobacillus paracasei subsp. paracasei CNCM I-4270	254	27,632	
S2QQH9	S2QQH9_LACPA	Threonine dehydrogenase	Lpp77_00805	Lactobacillus paracasei subsp. paracasei CNCM I-4270	360	38,594	
E4SZZ4	E4SZZ4_LACDN	Threonine dehydrogenase and related Zn-dependent dehydrogenase	adh1 LDBND_1094	Lactobacillus delbrueckii subsp. bulgaricus (strain ND02)	344	36,493	
S2Q6X0	S2Q6X0_LACPA	Alcohol dehydrogenase	Lpp77_13006	Lactobacillus paracasei subsp. paracasei CNCM I-4270	346	36,807	
S6BW79	S6BW79_LACCA	Short-chain alcohol dehydrogenase	LBCZ_0503	Lactobacillus casei subsp. casei ATCC 393	286	31,769	
S6C7D1	S6C7D1_LACCA	Short-chain alcohol dehydrogenase	LBCZ_1056	Lactobacillus casei subsp. casei ATCC 393	311	34,385	
G6CCK1	G6CCK1_LACCU	Alcohol dehydrogenase GroES-like domain protein	CRL705_129	Lactobacillus curvatus CRL 705	314	34,165	
F4ADY5	F4ADY5_LACJH	Alcohol dehydrogenase	LJP_0254c	Lactobacillus johnsonii DPC 6026	113	11,999	
G6CHF3	G6CHF3_LACCU	Zinc-binding alcohol dehydrogenase family protein	qor CRL705_1897	Lactobacillus curvatus CRL 705	338	37,149	
C2JZJ7	C2JZJ7_LACRH	Alcohol dehydrogenase, iron-dependent (EC 1.1.1.1)	adh3 HMPREF0539_2332	Lactobacillus rhamnosus LMS2-1	404	43,844	
C2K104	C2K104_LACRH	Zinc-binding alcohol dehydrogenase family protein	HMPREF0539_2839	Lactobacillus rhamnosus LMS2-1	340	36,974	
C2K1K8	C2K1K8_LACRH	Alcohol dehydrogenase, iron-dependent (EC 1.1.1.1) (Fragment)	HMPREF0539_3043	Lactobacillus rhamnosus LMS2-1	432	47,864	
G6CG49	G6CG49_LACCU	Alcohol dehydrogenase GroES-like domain protein	adh CRL705_1409	Lactobacillus curvatus CRL 705	345	36,316	
G6CEZ3	G6CEZ3_LACCU	Alcohol dehydrogenase GroES-like domain protein	CRL705_982	Lactobacillus curvatus CRL 705	336	36,748	
C2JUQ8	C2JUQ8_LACRH	GroES-like protein (EC 1.1.1.90)	xylB-1 HMPREF0539_0642	Lactobacillus rhamnosus LMS2-1	373	39,795	
G6CDS2	G6CDS2_LACCU	Aryl-alcohol dehydrogenase (EC 1.1.1.90)	xylB CRL705_556	Lactobacillus curvatus CRL 705	148	15,931	
G6CE34	G6CE34_LACCU	Putative zinc-containing alcohol dehydrogenase(Oxidoreductase)	CRL705_669	Lactobacillus curvatus CRL 705	349	37,9	
G6CE37	G6CE37_LACCU	Alcohol dehydrogenase GroES-like domain protein	cryZ CRL705_672	Lactobacillus curvatus CRL 705	317	34,171	
S6CAW3	S6CAW3_LACCA	Aryl-alcohol dehydrogenase	LBCZ_2571	Lactobacillus casei subsp. casei ATCC 393	309	34,03	
S6C5C6	S6C5C6_LACCA	Putative alcohol dehydrogenase	LBCZ_0241	Lactobacillus casei subsp. casei ATCC 393	361	39,735	
S6C0R1	S6C0R1_LACCA	Alcohol-acetaldehyde dehydrogenase	LBCZ_1893	Lactobacillus casei subsp. casei ATCC 393	398	43,661	
G6CDS6	G6CDS6_LACCU	Zinc-containing alcohol dehydrogenase	CRL705_560	Lactobacillus curvatus CRL 705	245	26,086	
C2K1F9	C2K1F9_LACRH	Zinc-binding alcohol dehydrogenase family protein	HMPREF0539_2994	Lactobacillus rhamnosus LMS2-1	341	36,488	
C2JTY7	C2JTY7_LACRH	Alcohol dehydrogenase, iron-dependent (EC 1.1.1.1)	gldA HMPREF0539_0379	Lactobacillus rhamnosus LMS2-1	378	40,392	
A0A0R1SXS1	A0A0R1SXS1_LACSK	Adh protein	FC71_GL000491	Lactobacillus sakei subsp. carnosus DSM 15831	346	36,29	
A0A0R1SQR3	A0A0R1SQR3_LACSK	Uncharacterized protein	FC71_GL001870	Lactobacillus sakei subsp. carnosus DSM 15831	372	39,906	
A0A0R1SQS1	A0A0R1SQS1_LACSK	AdhA protein	FC71_GL000306	Lactobacillus sakei subsp. carnosus DSM 15831	337	35,533	
S2P6R5	S2P6R5_LACPA	Short-chain alcohol dehydrogenase (Fragment)	Lpp123_16625	Lactobacillus paracasei subsp. paracasei Lpp123	192	20,628	
A0A0R2D0Z6	A0A0R2D0Z6_9LACO	Alcohol dehydrogenase	FC24_GL001633	Lactobacillus rennini DSM 20253	364	38,794	
A0A0R2CMW3	A0A0R2CMW3_9LACO	Zinc-containing alcohol dehydrogenase (Oxidoreductase)	FC24_GL000855	Lactobacillus rennini DSM 20253	327	35,051	
A0A0R2D6C9	A0A0R2D6C9_9LACO	Aryl-alcohol dehydrogenase	FC24_GL000595	Lactobacillus rennini DSM 20253	373	39,549	
A0A0R2D5Y5	A0A0R2D5Y5_9LACO	Iron-containing alcohol dehydrogenase	FC24_GL001938	Lactobacillus rennini DSM 20253	391	42,041	
A0A0R2DEL7	A0A0R2DEL7_9LACO	R-specific alcohol dehydrogenase	FC24_GL001198	Lactobacillus rennini DSM 20253	248	26,627	
A0A0R2D523	A0A0R2D523_9LACO	Alcohol dehydrogenase, iron-dependent	FC24_GL002084	Lactobacillus rennini DSM 20253	386	42,099	
A0A0R2DAV3	A0A0R2DAV3_9LACO	Zinc-containing alcohol dehydrogenase	FC24_GL000652	Lactobacillus rennini DSM 20253	290	30,526	
A0A0R2D3R3	A0A0R2D3R3_9LACO	Ethanol-active dehydrogenase acetaldehyde-active reductase	FC24_GL001199	Lactobacillus rennini DSM 20253	339	35,922	
A0A0R2DJ72	A0A0R2DJ72_9LACO	Zinc-binding alcohol dehydrogenase family protein	FC24_GL001515	Lactobacillus rennini DSM 20253	348	37,546	
S2P7B6	S2P7B6_LACPA	Short-chain alcohol dehydrogenase	Lpp123_15943	Lactobacillus paracasei subsp. paracasei Lpp123	277	30,196	
A0A0R2D9J9	A0A0R2D9J9_9LACO	Aldehyde-alcohol dehydrogenase	FC24_GL001574	Lactobacillus rennini DSM 20253	492	52,083	
S2P9F2	S2P9F2_LACPA	Putative zinc-type alcohol dehydrogenase-like protein AdhB	Lpp123_16208	Lactobacillus paracasei subsp. paracasei Lpp123	346	36,893	
A0A0R2BSA8	A0A0R2BSA8_9LACO	Aldehyde-alcohol dehydrogenase	FC25_GL001330	Lactobacillus ruminis DSM 20403 = NBRC 102161	462	49,139	
A0A0R2BSM7	A0A0R2BSM7_9LACO	Alcohol dehydrogenase	FC25_GL001152	Lactobacillus ruminis DSM 20403 = NBRC 102161	346	36,801	
S2P8V8	S2P8V8_LACPA	Zinc-type alcohol dehydrogenase-like protein	Lpp123_13965	Lactobacillus paracasei subsp. paracasei Lpp123	340	36,17	
S2PHX1	S2PHX1_LACPA	Alcohol-acetaldehyde dehydrogenase (Fragment)	Lpp123_09541	Lactobacillus paracasei subsp. paracasei Lpp123	321	34,802	
S2P6W9	S2P6W9_LACPA	Zinc-type alcohol dehydrogenase-like protein	Lpp123_16450	Lactobacillus paracasei subsp. paracasei Lpp123	49	5,281	
S2PU83	S2PU83_LACPA	Short-chain alcohol dehydrogenase (Fragment)	Lpp123_05633	Lactobacillus paracasei subsp. paracasei Lpp123	110	12,051	
S2QX12	S2QX12_LACPA	Zinc-containing alcohol dehydrogenase superfamily protein	Lpp123_00610	Lactobacillus paracasei subsp. paracasei Lpp123	58	6,311	
S2PY03	S2PY03_LACPA	Short-chain alcohol dehydrogenase (Fragment)	Lpp123_03864	Lactobacillus paracasei subsp. paracasei Lpp123	53	5,974	
S2PX39	S2PX39_LACPA	Alcohol dehydrogenase	Lpp123_03344	Lactobacillus paracasei subsp. paracasei Lpp123	334	36,65	
S2PQ98	S2PQ98_LACPA	Bifunctional acetaldehyde-CoA/alcohol dehydrogenase (Fragment)	Lpp123_06900	Lactobacillus paracasei subsp. paracasei Lpp123	457	49,062	
S2PXM0	S2PXM0_LACPA	Bifunctional acetaldehyde-CoA/alcohol dehydrogenase (Fragment)	Lpp123_04134	Lactobacillus paracasei subsp. paracasei Lpp123	185	20,713	
A0A0R1XHY8	A0A0R1XHY8_9LACO	Alcohol dehydrogenase, iron-dependent	FC91_GL001193	Lactobacillus harbinensis DSM 16991	364	38,99	
A0A0R1XJI0	A0A0R1XJI0_9LACO	Alcohol dehydrogenase	FC91_GL002847	Lactobacillus harbinensis DSM 16991	339	35,652	
A0A0R1XCP8	A0A0R1XCP8_9LACO	Aryl-alcohol dehydrogenase related enzyme	FC91_GL002301	Lactobacillus harbinensis DSM 16991	136	14,763	
A0A0R1XLU4	A0A0R1XLU4_9LACO	Zn-dependent alcohol dehydrogenase	FC91_GL001705	Lactobacillus harbinensis DSM 16991	376	40,244	
A0A0R1XQX0	A0A0R1XQX0_9LACO	Alcohol dehydrogenase	FC91_GL002935	Lactobacillus harbinensis DSM 16991	337	35,376	
A0A0R1XF02	A0A0R1XF02_9LACO	Alcohol dehydrogenase	FC91_GL000614	Lactobacillus harbinensis DSM 16991	403	44,394	
F5VDP3	F5VDP3_9LACO	Alcohol dehydrogenase (EC 1.1.1.1)	NIAS840_00679	Lactobacillus salivarius NIAS840	346	36,563	
Q5FK16	Q5FK16_LACAC	Alcohol dehydrogenase (EC 1.1.1.1)	LBA1114	Lactobacillus acidophilus (strain ATCC 700396 / NCK56 / N2 / NCFM)	149	16,221	
Q5FK17	Q5FK17_LACAC	Putative ferric reductase (EC 1.1.1.1)	LBA1113	Lactobacillus acidophilus (strain ATCC 700396 / NCK56 / N2 / NCFM)	271	31,475	
F5VBI6	F5VBI6_9LACO	Zinc-containing alcohol dehydrogenase / quinone oxidoreductase (NADPH:quinone reductase) (EC 1.1.1.-)	NIAS840_01333	Lactobacillus salivarius NIAS840	277	30,324	
A0A0R1UXX0	A0A0R1UXX0_9LACO	Putative L-threonine 3-dehydrogenase	FC21_GL000161	Lactobacillus equigenerosi DSM 18793 = JCM 14505	336	35,93	
I7JV22	I7JV22_9LACO	Alcohol dehydrogenase / acetaldehyde dehydrogenase (EC 1.1.1.1)	BN55_01895	Lactobacillus hominis DSM 23910 = CRBIP 24.179	868	95,122	
A0A0R1USI5	A0A0R1USI5_9LACO	Alcohol dehydrogenase GroES domain protein	FC21_GL000528	Lactobacillus equigenerosi DSM 18793 = JCM 14505	340	35,841	
A0A0R1VCX1	A0A0R1VCX1_9LACO	Short-chain alcohol dehydrogenase	FC60_GL000720	Lactobacillus gastricus DSM 16045	257	27,926	
A0A0R1UPI1	A0A0R1UPI1_9LACO	Putative L-threonine 3-dehydrogenase	FC21_GL001158	Lactobacillus equigenerosi DSM 18793 = JCM 14505	336	35,928	
A0A0R1UYA8	A0A0R1UYA8_9LACO	Alcohol dehydrogenase	FC21_GL001223	Lactobacillus equigenerosi DSM 18793 = JCM 14505	356	37,586	
I7KH59	I7KH59_9LACO	Alcohol dehydrogenase (EC 1.1.1.1)	BN55_00615	Lactobacillus hominis DSM 23910 = CRBIP 24.179	346	37,522	
A0A0R1V9Y6	A0A0R1V9Y6_9LACO	Putative (R,R)-butanediol dehydrogenase	FC60_GL000308	Lactobacillus gastricus DSM 16045	350	37,026	
A0A0R1V429	A0A0R1V429_9LACO	Alcohol dehydrogenase	FC60_GL001236	Lactobacillus gastricus DSM 16045	325	34,693	
A0A0R1VGD7	A0A0R1VGD7_9LACO	Alcohol dehydrogenase superfamily,zinc-containing protein	FC60_GL001279	Lactobacillus gastricus DSM 16045	347	37,049	
A0A0R1V491	A0A0R1V491_9LACO	Alcohol dehydrogenase	FC60_GL001243	Lactobacillus gastricus DSM 16045	340	36,074	
A0A0R1VAL6	A0A0R1VAL6_9LACO	Putative L-threonine 3-dehydrogenase	FC60_GL001667	Lactobacillus gastricus DSM 16045	336	36,028	
A0A0R1VCC4	A0A0R1VCC4_9LACO	Alcohol dehydrogenase	FC60_GL001455	Lactobacillus gastricus DSM 16045	353	37,795	
A0A0R1VJM0	A0A0R1VJM0_9LACO	Benzyl alcohol dehydrogenase	FC60_GL001271	Lactobacillus gastricus DSM 16045	364	38,433	
A0A0R1VD04	A0A0R1VD04_9LACO	Alcohol dehydrogenase zinc-binding domain-containing protein	FC60_GL001154	Lactobacillus gastricus DSM 16045	346	37,412	
A0A0R1VA41	A0A0R1VA41_9LACO	Alcohol dehydrogenase	FC60_GL000300	Lactobacillus gastricus DSM 16045	356	37,739	
A0A0R1V376	A0A0R1V376_9LACO	Alcohol dehydrogenase-like	FC60_GL001365	Lactobacillus gastricus DSM 16045	342	37,06	
C2EGI8	C2EGI8_9LACO	GroES-like protein (EC 1.1.1.1)	adh HMPREF0545_0760	Lactobacillus salivarius DSM 20555 = ATCC 11741	346	36,582	
C2EJ13	C2EJ13_9LACO	GroES-like protein (EC 1.1.1.90)	adhC HMPREF0545_1635	Lactobacillus salivarius DSM 20555 = ATCC 11741	373	40,175	
C2EJ90	C2EJ90_9LACO	Alcohol dehydrogenase, iron-dependent (EC 1.1.1.1)	HMPREF0545_1712	Lactobacillus salivarius DSM 20555 = ATCC 11741	885	97,284	
V7HWG9	V7HWG9_9LACO	Alcohol dehydrogenase	LEQ_1498c	Lactobacillus equi DPC 6820	346	37,188	
A0A0R1UKU9	A0A0R1UKU9_LACPN	Aryl-alcohol dehydrogenase	FD10_GL001220	Lactobacillus plantarum subsp. argentoratensis DSM 16365	373	40,004	
A0A0R1UYR0	A0A0R1UYR0_LACPN	Alcohol dehydrogenase	FD10_GL002870	Lactobacillus plantarum subsp. argentoratensis DSM 16365	314	33,196	
V7HYG1	V7HYG1_9LACO	Alcohol dehydrogenase, iron-dependent	LEQ_1926	Lactobacillus equi DPC 6820	383	41,306	
A0A0R1VC20	A0A0R1VC20_LACPN	L-iditol 2-dehydrogenase	FD10_GL002331	Lactobacillus plantarum subsp. argentoratensis DSM 16365	369	40,138	
V7HW72	V7HW72_9LACO	L-iditol 2-dehydrogenase	LEQ_1754c	Lactobacillus equi DPC 6820	358	39,172	
A0A0R1UX75	A0A0R1UX75_LACPN	Alcohol dehydrogenase	FD10_GL000142	Lactobacillus plantarum subsp. argentoratensis DSM 16365	347	36,706	
A0A0R1VDI5	A0A0R1VDI5_LACPN	Aryl-alcohol dehydrogenase family enzyme	FD10_GL000015	Lactobacillus plantarum subsp. argentoratensis DSM 16365	330	36,977	
V7HY20	V7HY20_9LACO	Aryl-alcohol dehydrogenase	LEQ_1696	Lactobacillus equi DPC 6820	373	40,011	
A0A0R1US03	A0A0R1US03_LACPN	Alcohol dehydrogenase	FD10_GL000408	Lactobacillus plantarum subsp. argentoratensis DSM 16365	346	36,709	
A0A0R1F7B4	A0A0R1F7B4_LACCA	Short-chain alcohol dehydrogenase	FC13_GL001620	Lactobacillus casei DSM 20011 = JCM 1134	299	32,507	
A0A0R1F2W4	A0A0R1F2W4_LACCA	Short-chain alcohol dehydrogenase	FC13_GL000657	Lactobacillus casei DSM 20011 = JCM 1134	277	30,226	
A0A0R1F799	A0A0R1F799_LACCA	Short-chain alcohol dehydrogenase	FC13_GL001752	Lactobacillus casei DSM 20011 = JCM 1134	298	33,273	
A0A0R1ITG4	A0A0R1ITG4_9LACO	Short-chain alcohol dehydrogenase	FC68_GL000415	Lactobacillus farciminis KCTC 3681 = DSM 20184	240	26,087	
A0A0R1F4A8	A0A0R1F4A8_LACCA	Alcohol-acetaldehyde dehydrogenase	FC13_GL000292	Lactobacillus casei DSM 20011 = JCM 1134	397	43,179	
A0A0R1IQC4	A0A0R1IQC4_9LACO	Alcohol dehydrogenase	FC68_GL001231	Lactobacillus farciminis KCTC 3681 = DSM 20184	347	36,717	
A0A0R1G2R5	A0A0R1G2R5_LACPE	Alcohol dehydrogenase	FD24_GL003150	Lactobacillus pentosus DSM 20314	299	32,115	
A0A0R1IVU8	A0A0R1IVU8_9LACO	Aryl-alcohol dehydrogenase	FC68_GL000146	Lactobacillus farciminis KCTC 3681 = DSM 20184	373	39,825	
A0A0R1FQX2	A0A0R1FQX2_LACPE	Aryl-alcohol dehydrogenase	FD24_GL000541	Lactobacillus pentosus DSM 20314	373	39,995	
A0A0R1FV08	A0A0R1FV08_LACPE	Iron-containing alcohol dehydrogenase	FD24_GL003040	Lactobacillus pentosus DSM 20314	433	47,018	
A0A0R1F5I1	A0A0R1F5I1_LACCA	Aryl-alcohol dehydrogenase related enzyme	FC13_GL002410	Lactobacillus casei DSM 20011 = JCM 1134	309	34,038	
A0A0R1FYS1	A0A0R1FYS1_LACPE	Alcohol dehydrogenase	FD24_GL000756	Lactobacillus pentosus DSM 20314	305	32,692	
A0A0R1F7W9	A0A0R1F7W9_LACCA	Alcohol dehydrogenase	FC13_GL001398	Lactobacillus casei DSM 20011 = JCM 1134	298	31,446	
A0A0R1G1T5	A0A0R1G1T5_LACPE	Aryl-alcohol dehydrogenase family enzyme	FD24_GL003101	Lactobacillus pentosus DSM 20314	329	36,637	
A0A0R1FN32	A0A0R1FN32_LACPE	L-iditol 2-dehydrogenase	FD24_GL001211	Lactobacillus pentosus DSM 20314	352	38,233	
A0A0R1FMD6	A0A0R1FMD6_LACPE	Alcohol dehydrogenase	FD24_GL001365	Lactobacillus pentosus DSM 20314	347	36,792	
A0A0R1IU67	A0A0R1IU67_9LACO	Alcohol dehydrogenase, zinc-binding protein	FC68_GL002283	Lactobacillus farciminis KCTC 3681 = DSM 20184	337	37,625	
A0A0R1F6G5	A0A0R1F6G5_LACCA	Aryl-alcohol dehydrogenase related enzyme	FC13_GL001984	Lactobacillus casei DSM 20011 = JCM 1134	334	37,026	
A0A0R1IUA1	A0A0R1IUA1_9LACO	Zinc-containing alcohol dehydrogenase superfamily protein	FC68_GL001927	Lactobacillus farciminis KCTC 3681 = DSM 20184	317	34,815	
A0A0R1IUZ8	A0A0R1IUZ8_9LACO	Alcohol dehydrogenase	FC68_GL002074	Lactobacillus farciminis KCTC 3681 = DSM 20184	328	35,278	
A0A0R2C033	A0A0R2C033_9LACO	L-threonine 3-dehydrogenase	FC35_GL001801	Lactobacillus coleohominis DSM 14060	336	35,853	
A0A0R2BPD7	A0A0R2BPD7_9LACO	Alcohol dehydrogenase	FC35_GL000174	Lactobacillus coleohominis DSM 14060	357	38,877	
A0A0F4LCK2	A0A0F4LCK2_9LACO	Short-chain alcohol dehydrogenase	JF74_17930	Lactobacillus melliventris	295	31,285	
A0A0R2BK35	A0A0R2BK35_9LACO	Alcohol dehydrogenase GroES domain-containing protein	FC35_GL000658	Lactobacillus coleohominis DSM 14060	76	8,439	
A0A0R1GUX1	A0A0R1GUX1_9LACO	Short-chain alcohol dehydrogenase	FD07_GL002313	Lactobacillus parabrevis ATCC 53295	252	26,619	
G9ZQX8	G9ZQX8_9LACO	GroES-like protein	HMPREF9103_02136	Lactobacillus parafarraginis F0439	333	36,146	
A0A0R1H0S5	A0A0R1H0S5_9LACO	Short-chain alcohol dehydrogenase	FD07_GL000306	Lactobacillus parabrevis ATCC 53295	252	26,827	
G9ZL16	G9ZL16_9LACO	Zinc-binding alcohol dehydrogenase family protein	HMPREF9103_00414	Lactobacillus parafarraginis F0439	337	36,407	
A0A0R1GVI5	A0A0R1GVI5_9LACO	Aryl-alcohol dehydrogenase related enzyme	FD07_GL002082	Lactobacillus parabrevis ATCC 53295	327	35,576	
A0A0R1GN73	A0A0R1GN73_9LACO	Alcohol dehydrogenase	FD07_GL001387	Lactobacillus parabrevis ATCC 53295	338	36,04	
A0A0R1GPR9	A0A0R1GPR9_9LACO	Threonine dehydrogenase related Zn-dependent dehydrogenase	FD07_GL001281	Lactobacillus parabrevis ATCC 53295	335	35,856	
G9ZT00	G9ZT00_9LACO	Putative benzyl alcohol dehydrogenase AreB	HMPREF9103_02917	Lactobacillus parafarraginis F0439	373	39,919	
A0A0F4LDV0	A0A0F4LDV0_9LACO	Aryl-alcohol dehydrogenase related enzyme	JF74_05290	Lactobacillus melliventris	313	34,781	
A0A0R1M7R3	A0A0R1M7R3_9LACO	L-iditol 2-dehydrogenase	FC81_GL001748	Lactobacillus capillatus DSM 19910	359	38,873	
A0A0R1GWK6	A0A0R1GWK6_9LACO	Threonine dehydrogenase related Zn-dependent dehydrogenase	FD07_GL001277	Lactobacillus parabrevis ATCC 53295	333	35,526	
A0A0F4LDN5	A0A0F4LDN5_9LACO	Alcohol dehydrogenase	JF74_15100	Lactobacillus melliventris	358	39,358	
G9ZQ08	G9ZQ08_9LACO	Alcohol dehydrogenase, propanol-preferring	HMPREF9103_01813	Lactobacillus parafarraginis F0439	342	36,71	
A0A0R1GPX3	A0A0R1GPX3_9LACO	Zn-dependent alcohol dehydrogenase	FD07_GL001100	Lactobacillus parabrevis ATCC 53295	374	39,645	
A0A0R1LZJ8	A0A0R1LZJ8_9LACO	Alcohol dehydrogenase, zinc-binding protein	FC81_GL001650	Lactobacillus capillatus DSM 19910	352	39,168	
A0A0R1LYI0	A0A0R1LYI0_9LACO	Aryl-alcohol dehydrogenase-like protein	FC81_GL001982	Lactobacillus capillatus DSM 19910	330	37,176	
G9ZNZ6	G9ZNZ6_9LACO	Zinc-binding alcohol dehydrogenase family protein	HMPREF9103_01450	Lactobacillus parafarraginis F0439	342	37,59	
A0A0F4LDK5	A0A0F4LDK5_9LACO	GroES-like protein	JF74_17400	Lactobacillus melliventris	372	39,886	
G9ZNG8	G9ZNG8_9LACO	GroES-like protein	HMPREF9103_01271	Lactobacillus parafarraginis F0439	347	36,685	
A0A0F4LBL2	A0A0F4LBL2_9LACO	Uncharacterized protein	JF74_15130	Lactobacillus melliventris	350	37,799	
A0A0R1GQ03	A0A0R1GQ03_9LACO	Alcohol dehydrogenase	FD07_GL001116	Lactobacillus parabrevis ATCC 53295	352	37,46	
A0A0R1GNA4	A0A0R1GNA4_9LACO	Alcohol dehydrogenase GroES domain protein	FD07_GL001386	Lactobacillus parabrevis ATCC 53295	333	36,182	
A0A0R1GV07	A0A0R1GV07_9LACO	Aryl-alcohol dehydrogenase related enzyme	FD07_GL002194	Lactobacillus parabrevis ATCC 53295	332	37,565	
A5VM35	A5VM35_LACRD	Alcohol dehydrogenase GroES domain protein	Lreu_1670	Lactobacillus reuteri (strain DSM 20016)	328	34,921	ADH2
A5VMM4	A5VMM4_LACRD	Alcohol dehydrogenase GroES domain protein	Lreu_1860	Lactobacillus reuteri (strain DSM 20016)	336	35,918	ADH1
A5VHI2	A5VHI2_LACRD	Iron-containing alcohol dehydrogenase	Lreu_0030	Lactobacillus reuteri (strain DSM 20016)	390	42,181	ADH7
A5VLV6	A5VLV6_LACRD	Alcohol dehydrogenase, zinc-binding domain protein	Lreu_1589	Lactobacillus reuteri (strain DSM 20016)	351	37,668	ADH8
A5VLQ6	A5VLQ6_LACRD	Alcohol dehydrogenase, zinc-binding type 2	Lreu_1535	Lactobacillus reuteri (strain DSM 20016)	348	37,899	ADH4
A5VLU6	A5VLU6_LACRD	Alcohol dehydrogenase GroES domain protein	Lreu_1578	Lactobacillus reuteri (strain DSM 20016)	368	39,107	ADH3
D8IJ56	D8IJ56_LACFC	Short-chain alcohol dehydrogenase	LC40_1123	Lactobacillus fermentum (strain CECT 5716)	255	27,797	
A5VLL8	A5VLL8_LACRD	Alcohol dehydrogenase GroES domain protein	Lreu_1496	Lactobacillus reuteri (strain DSM 20016)	342	36,124	ADH5
A5VM99	A5VM99_LACRD	Iron-containing alcohol dehydrogenase	Lreu_1734	Lactobacillus reuteri (strain DSM 20016)	373	40,361	PDUQ
D8IIQ6	D8IIQ6_LACFC	Alcohol dehydrogenase (EC 1.1.1.1)	LC40_0964	Lactobacillus fermentum (strain CECT 5716)	339	35,783	
S2MSX7	S2MSX7_LACPA	Aryl-alcohol dehydrogenase related enzyme	Lpp22_2535	Lactobacillus paracasei subsp. paracasei Lpp22	309	34,035	
A0A0R1S3Q0	A0A0R1S3Q0_9LACO	Alcohol dehydrogenase	FC23_GL000504	Lactobacillus psittaci DSM 15354	344	37,281	
S2MX48	S2MX48_LACPA	Aryl-alcohol dehydrogenase-like enzyme	Lpp22_0489	Lactobacillus paracasei subsp. paracasei Lpp22	334	37,067	
D8IIT4	D8IIT4_LACFC	Alcohol dehydrogenase	LC40_0999	Lactobacillus fermentum (strain CECT 5716)	344	36,772	
D8IHV0	D8IHV0_LACFC	Possible (R,R)-butanediol dehydrogenase (EC 1.1.1.4)	LC40_0618	Lactobacillus fermentum (strain CECT 5716)	350	37,197	
D8IIH4	D8IIH4_LACFC	Alcohol dehydrogenase	LC40_0864	Lactobacillus fermentum (strain CECT 5716)	280	29,789	
D8IHW3	D8IHW3_LACFC	Alcohol dehydrogenase	LC40_0631	Lactobacillus fermentum (strain CECT 5716)	356	37,87	
D8IHL0	D8IHL0_LACFC	Benzyl alcohol dehydrogenase	LC40_0525	Lactobacillus fermentum (strain CECT 5716)	363	39,029	
A0A0C1M291	A0A0C1M291_LACBR	Short-chain alcohol dehydrogenase	LbDm2_1472	Lactobacillus brevis	273	29,364	
A0A0R1QIL7	A0A0R1QIL7_9LACO	Aryl-alcohol dehydrogenase related enzyme	FD01_GL001849	Lactobacillus manihotivorans DSM 13343 = JCM 12514	335	37,267	
A0A0D0H1J8	A0A0D0H1J8_LACBR	Short-chain alcohol dehydrogenase	N624_1525	Lactobacillus brevis	169	18,691	
A0A0R1R4T5	A0A0R1R4T5_9LACO	Alcohol-acetaldehyde dehydrogenase	FD01_GL002433	Lactobacillus manihotivorans DSM 13343 = JCM 12514	392	42,491	
A0A0R1QQJ4	A0A0R1QQJ4_9LACO	Alcohol dehydrogenase	FD01_GL001690	Lactobacillus manihotivorans DSM 13343 = JCM 12514	344	36,369	
A0A0R1QKG7	A0A0R1QKG7_9LACO	Alcohol dehydrogenase	FD01_GL000762	Lactobacillus manihotivorans DSM 13343 = JCM 12514	335	36,769	
A0A0R1QPX0	A0A0R1QPX0_9LACO	Short-chain alcohol dehydrogenase	FD01_GL000435	Lactobacillus manihotivorans DSM 13343 = JCM 12514	287	31,849	
A0A0R1RBC1	A0A0R1RBC1_9LACO	Short-chain alcohol dehydrogenase	FD01_GL002395	Lactobacillus manihotivorans DSM 13343 = JCM 12514	233	24,553	
A0A0C1PVA3	A0A0C1PVA3_LACBR	Short-chain alcohol dehydrogenase	LbDm2_0749	Lactobacillus brevis	264	28,794	
A0A0R1QQ18	A0A0R1QQ18_9LACO	Alcohol dehydrogenase	FD01_GL001760	Lactobacillus manihotivorans DSM 13343 = JCM 12514	334	35,914	
A0A0R1R6Q3	A0A0R1R6Q3_9LACO	Zn-dependent alcohol dehydrogenase	FD01_GL001640	Lactobacillus manihotivorans DSM 13343 = JCM 12514	373	39,859	
A0A0D0GU02	A0A0D0GU02_LACBR	Short-chain alcohol dehydrogenase	N624_1526	Lactobacillus brevis	83	8,684	
A0A0C1Q768	A0A0C1Q768_LACBR	Alcohol dehydrogenase (EC 1.1.1.1)	LbDm2_1855	Lactobacillus brevis	347	36,929	
A0A0R1QLC2	A0A0R1QLC2_9LACO	Aryl-alcohol dehydrogenase related enzyme	FD01_GL000741	Lactobacillus manihotivorans DSM 13343 = JCM 12514	280	30,478	
A0A0D0FCV1	A0A0D0FCV1_LACBR	Aldehyde-alcohol dehydrogenase	N624_0552	Lactobacillus brevis	872	95,255	
A0A0D0G825	A0A0D0G825_LACBR	Bifunctional protein: zinc-containing alcohol dehydrogenase (EC 1.1.1.-)	N624_1808	Lactobacillus brevis	342	37,478	
A0A0D0FBS4	A0A0D0FBS4_LACBR	Bifunctional protein: zinc-containing alcohol dehydrogenase (EC 1.1.1.-)	N624_0162	Lactobacillus brevis	314	33,108	
A0A0C1PYK8	A0A0C1PYK8_LACBR	Alcohol dehydrogenase (EC 1.1.1.1)	LbDm2_0383	Lactobacillus brevis	338	36,035	
A0A0D0GYB5	A0A0D0GYB5_LACBR	Alcohol dehydrogenase (EC 1.1.1.1)	N624_0285	Lactobacillus brevis	347	36,898	
A0A0C1M6A3	A0A0C1M6A3_LACBR	Alcohol dehydrogenase (EC 1.1.1.1)	LbDm2_0232	Lactobacillus brevis	347	36,937	
A0A0C1Q6J3	A0A0C1Q6J3_LACBR	Alcohol dehydrogenase (EC 1.1.1.1)	LbDm2_1705	Lactobacillus brevis	386	41,413	
A0A0C1Q1Y6	A0A0C1Q1Y6_LACBR	Aryl-alcohol dehydrogenase family enzyme	LbDm2_2566	Lactobacillus brevis	329	36,89	
A0A0C1QA99	A0A0C1QA99_LACBR	Bifunctional protein: zinc-containing alcohol dehydrogenase (EC 1.1.1.-)	LbDm2_0085	Lactobacillus brevis	342	37,454	
A0A0D0H464	A0A0D0H464_LACBR	Bifunctional protein: zinc-containing alcohol dehydrogenase (EC 1.1.1.-)	N624_2460	Lactobacillus brevis	168	18,503	
A0A0C1M9U4	A0A0C1M9U4_LACBR	Alcohol dehydrogenase (EC 1.1.1.1)	LbDm2_1851	Lactobacillus brevis	45	5,106	
A0A0D0H2S1	A0A0D0H2S1_LACBR	Bifunctional protein: zinc-containing alcohol dehydrogenase (EC 1.1.1.-)	N624_1915	Lactobacillus brevis	314	34,095	
A0A0D0GVR2	A0A0D0GVR2_LACBR	Alcohol dehydrogenase (EC 1.1.1.1)	N624_2146	Lactobacillus brevis	165	17,309	
A0A0D0GX78	A0A0D0GX78_LACBR	Aryl-alcohol dehydrogenase family enzyme	N624_1654	Lactobacillus brevis	180	19,986	
A0A0D0GRX3	A0A0D0GRX3_LACBR	Alcohol dehydrogenase (EC 1.1.1.1)	N624_0721	Lactobacillus brevis	322	34,053	
A0A0C1MD61	A0A0C1MD61_LACBR	Bifunctional protein: zinc-containing alcohol dehydrogenase (EC 1.1.1.-)	LbDm2_0181	Lactobacillus brevis	314	34,078	
A0A0D0GZN8	A0A0D0GZN8_LACBR	Bifunctional protein: zinc-containing alcohol dehydrogenase (EC 1.1.1.-)	N624_2459	Lactobacillus brevis	175	19,181	
A0A0C1Q5V4	A0A0C1Q5V4_LACBR	Bifunctional protein: zinc-containing alcohol dehydrogenase (EC 1.1.1.-)	LbDm2_1465	Lactobacillus brevis	337	36,657	
A0A0C1M1I4	A0A0C1M1I4_LACBR	Aldehyde-alcohol dehydrogenase	LbDm2_2095	Lactobacillus brevis	873	95,368	
A0A0C1M6A8	A0A0C1M6A8_LACBR	Bifunctional protein: zinc-containing alcohol dehydrogenase (EC 1.1.1.-)	LbDm2_0237	Lactobacillus brevis	322	34,761	
A0A0C1M9L2	A0A0C1M9L2_LACBR	Bifunctional protein: zinc-containing alcohol dehydrogenase (EC 1.1.1.-)	LbDm2_1746	Lactobacillus brevis	314	33,126	
A0A0C1MB50	A0A0C1MB50_LACBR	Alcohol dehydrogenase (EC 1.1.1.1)	LbDm2_1075	Lactobacillus brevis	336	35,528	
A0A0D0FEZ9	A0A0D0FEZ9_LACBR	Alcohol dehydrogenase (EC 1.1.1.1)	N624_1297	Lactobacillus brevis	371	39,22	
A0A089QKX4	A0A089QKX4_9LACO	Alcohol dehydrogenase	LSJ_2204c	Lactobacillus salivarius	349	38,203	
D0DMV8	D0DMV8_9LACO	GroES-like protein	HMPREF0527_00627	Lactobacillus jensenii SJ-7A-US	344	37,123	
A0A089QKE0	A0A089QKE0_9LACO	Alcohol dehydrogenase (EC 1.1.1.1)	LSJ_1759	Lactobacillus salivarius	346	36,576	
D0DQK9	D0DQK9_9LACO	Aldehyde-alcohol dehydrogenase 2 (EC 1.1.1.1) (EC 1.2.1.10)	adh HMPREF0527_01578	Lactobacillus jensenii SJ-7A-US	802	87,833	
A0A0R2D956	A0A0R2D956_9LACO	Aryl-alcohol dehydrogenase related enzyme	FC19_GL001868	Lactobacillus aquaticus DSM 21051	305	34,177	
A0A089QFM9	A0A089QFM9_9LACO	Aldehyde-alcohol dehydrogenase	LSJ_2149c	Lactobacillus salivarius	885	97,285	
A0A0R2D0V3	A0A0R2D0V3_9LACO	Aryl-alcohol dehydrogenase-like protein	FC19_GL001840	Lactobacillus aquaticus DSM 21051	330	37,485	
A0A089QI03	A0A089QI03_9LACO	Aryl-alcohol dehydrogenase (EC 1.1.1.90)	LSJ_2035	Lactobacillus salivarius	373	40,175	
A0A0R2CZN9	A0A0R2CZN9_9LACO	L-iditol 2-dehydrogenase	FC19_GL000238	Lactobacillus aquaticus DSM 21051	356	38,379	
A0A0R2CXX3	A0A0R2CXX3_9LACO	Alcohol dehydrogenase, zinc-binding protein	FC19_GL000338	Lactobacillus aquaticus DSM 21051	340	37,873	
A0A0C1PNK4	A0A0C1PNK4_9LACO	2,3-butanediol dehydrogenase, S-alcohol forming, (R)-acetoin-specific (EC 1.1.1.4)	LfDm3_0246	Lactobacillus fructivorans	258	27,176	
A0A0R2EC26	A0A0R2EC26_9LACO	Short-chain alcohol dehydrogenase	IV37_GL000572	Lactobacillus fructivorans	252	27,25	
A0A0C1M4F4	A0A0C1M4F4_9LACO	Aldehyde-alcohol dehydrogenase	LfDm3_1300	Lactobacillus fructivorans	872	95,372	
A0A0C1M7A4	A0A0C1M7A4_9LACO	Bifunctional protein: zinc-containing alcohol dehydrogenase (EC 1.1.1.-)	LfDm3_0198	Lactobacillus fructivorans	348	39,09	
A0A0R2N1F7	A0A0R2N1F7_9LACO	GroES-like protein	IV58_GL001115	Lactobacillus delbrueckii subsp. jakobsenii ZN7a-9 = DSM 26046	344	36,691	
A0A0R2EA80	A0A0R2EA80_9LACO	Alcohol dehydrogenase	IV37_GL000809	Lactobacillus fructivorans	168	18,393	
A0A0C1PQ86	A0A0C1PQ86_9LACO	Alcohol dehydrogenase (EC 1.1.1.1)	LfDm3_0461	Lactobacillus fructivorans	351	38,206	
A0A0R2EAA1	A0A0R2EAA1_9LACO	Alcohol dehydrogenase, zinc-containing	IV37_GL000826	Lactobacillus fructivorans	338	37,328	
A0A0R2E8X5	A0A0R2E8X5_9LACO	Alcohol dehydrogenase, zinc-binding protein	IV37_GL000557	Lactobacillus fructivorans	346	38,797	
A0A0R2MVD9	A0A0R2MVD9_9LACO	Aldehyde-alcohol dehydrogenase 2	IV58_GL001379	Lactobacillus delbrueckii subsp. jakobsenii ZN7a-9 = DSM 26046	288	31,523	
A0A0C1PRI9	A0A0C1PRI9_9LACO	Bifunctional protein: zinc-containing alcohol dehydrogenase (EC 1.1.1.-)	LfDm3_0425	Lactobacillus fructivorans	150	16,934	
A0A0R2EA28	A0A0R2EA28_9LACO	Zinc-binding alcohol dehydrogenase family protein	IV37_GL000005	Lactobacillus fructivorans	351	38,236	
A0A0C1PNB8	A0A0C1PNB8_9LACO	Alcohol dehydrogenase (EC 1.1.1.1)	LfDm3_0146	Lactobacillus fructivorans	342	36,233	
A0A0C1LYK6	A0A0C1LYK6_9LACO	Sorbitol dehydrogenase (EC 1.1.1.14)	LfDm3_0633	Lactobacillus fructivorans	366	39,623	
A0A0R2E9J1	A0A0R2E9J1_9LACO	Alcohol dehydrogenase	IV37_GL000810	Lactobacillus fructivorans	190	20,206	
A0A0R2EK96	A0A0R2EK96_9LACO	Ethanol-active dehydrogenase acetaldehyde-active reductase	IV37_GL000506	Lactobacillus fructivorans	344	36,521	
A0A0C1PP06	A0A0C1PP06_9LACO	Bifunctional protein: zinc-containing alcohol dehydrogenase (EC 1.1.1.-)	LfDm3_0426	Lactobacillus fructivorans	167	17,926	
A0A0R2MV48	A0A0R2MV48_9LACO	Aldehyde-alcohol dehydrogenase 2 domain protein	IV58_GL000807	Lactobacillus delbrueckii subsp. jakobsenii ZN7a-9 = DSM 26046	533	58,233	
A0A0R2E7N5	A0A0R2E7N5_9LACO	Aldehyde-alcohol dehydrogenase	IV37_GL001136	Lactobacillus fructivorans	878	95,953	
A0A0R2EGC3	A0A0R2EGC3_9LACO	Sorbitol dehydrogenase	IV37_GL001296	Lactobacillus fructivorans	366	39,672	
A0A0C1Q3M4	A0A0C1Q3M4_9LACO	Alcohol dehydrogenase (EC 1.1.1.1)	LfDm3_0412	Lactobacillus fructivorans	347	37,289	
C2EN76	C2EN76_9LACO	Oxidoreductase, aldo/keto reductase family protein (EC 1.1.1.91)	HMPREF0548_1122	Lactobacillus ultunensis DSM 16047	334	37,699	
C2ELC9	C2ELC9_9LACO	Aldehyde dehydrogenase (NAD) family protein (EC 1.2.1.-)	adh2 HMPREF0548_0475	Lactobacillus ultunensis DSM 16047	875	96,224	
C2EMM5	C2EMM5_9LACO	GroES-like protein (EC 1.1.1.90)	adhC HMPREF0548_0921	Lactobacillus ultunensis DSM 16047	373	40,313	
C2EQP2	C2EQP2_9LACO	Zinc-binding alcohol dehydrogenase family protein	HMPREF0548_1988	Lactobacillus ultunensis DSM 16047	281	31,262	
Q036R2	Q036R2_LACC3	Short-chain alcohol dehydrogenase	LSEI_2057	Lactobacillus casei (strain ATCC 334)	237	24,379	
T5JXN8	T5JXN8_LACPN	Alcohol dehydrogenase	N692_10470	Lactobacillus plantarum EGD-AQ4	156	17,761	
Q03BU6	Q03BU6_LACC3	Short-chain alcohol dehydrogenase	LSEI_0475	Lactobacillus casei (strain ATCC 334)	277	30,226	
Q039Y3	Q039Y3_LACC3	Short-chain alcohol dehydrogenase	LSEI_1203	Lactobacillus casei (strain ATCC 334)	311	34,085	
A0A0C9QNT4	A0A0C9QNT4_LACPA	Short-chain alcohol dehydrogenase	LC1981_0301	Lactobacillus paracasei NRIC 1981	277	30,182	
Q03B67	Q03B67_LACC3	Short-chain alcohol dehydrogenase	LSEI_0715	Lactobacillus casei (strain ATCC 334)	286	31,822	
A0A0C9Q4C9	A0A0C9Q4C9_LACPA	Short-chain alcohol dehydrogenase	LC1981_0950	Lactobacillus paracasei NRIC 1981	311	34,085	
T5JLB8	T5JLB8_LACPN	Molecular chaperone GroES	N692_01560	Lactobacillus plantarum EGD-AQ4	347	36,701	
T5JWB0	T5JWB0_LACPN	Zinc-binding dehydrogenase	N692_03805	Lactobacillus plantarum EGD-AQ4	289	31,031	
A0A0C9QT78	A0A0C9QT78_LACPA	Zinc-containing alcohol dehydrogenase	LC1981_1746	Lactobacillus paracasei NRIC 1981	350	38,249	
T5JDI0	T5JDI0_LACPN	Alcohol dehydrogenase	N692_08835	Lactobacillus plantarum EGD-AQ4	323	34,177	
T5JRY7	T5JRY7_LACPN	Alcohol dehydrogenase	N692_09220	Lactobacillus plantarum EGD-AQ4	342	36,226	
T5JYJ3	T5JYJ3_LACPN	Alcohol dehydrogenase	N692_11605	Lactobacillus plantarum EGD-AQ4	304	32,526	
Q034L5	Q034L5_LACC3	Aryl-alcohol dehydrogenase related enzyme	LSEI_2638	Lactobacillus casei (strain ATCC 334)	334	37,026	
T5JPI2	T5JPI2_LACPN	Bifunctional acetaldehyde-CoA/alcohol dehydrogenase	N692_08105	Lactobacillus plantarum EGD-AQ4	456	48,722	
Q036J7	Q036J7_LACC3	Alcohol-acetaldehyde dehydrogenase	LSEI_2125	Lactobacillus casei (strain ATCC 334)	397	43,179	
A0A0C9QUU4	A0A0C9QUU4_LACPA	Zinc-containing alcohol dehydrogenase superfamily protein	LC1981_1197	Lactobacillus paracasei NRIC 1981	303	32,266	
A0A0C9QZB8	A0A0C9QZB8_LACPA	Aryl-alcohol dehydrogenase family enzyme	LC1981_2697	Lactobacillus paracasei NRIC 1981	334	37,02	
T5JQ44	T5JQ44_LACPN	Uncharacterized protein	N692_07735	Lactobacillus plantarum EGD-AQ4	353	38,754	
A0A0C9PBC1	A0A0C9PBC1_LACPA	Alcohol dehydrogenase	LC1981_0859	Lactobacillus paracasei NRIC 1981	346	36,863	
T5K0J0	T5K0J0_LACPN	Molecular chaperone GroES	N692_02335	Lactobacillus plantarum EGD-AQ4	346	37,047	
T5JSS1	T5JSS1_LACPN	Aryl-alcohol dehydrogenase	N692_03340	Lactobacillus plantarum EGD-AQ4	373	39,935	
T5JQ17	T5JQ17_LACPN	Sorbitol dehydrogenase	N692_07730	Lactobacillus plantarum EGD-AQ4	360	39,188	
A0A0C9QEC0	A0A0C9QEC0_LACPA	Zn-dependent alcohol dehydrogenase	LC1981_1728	Lactobacillus paracasei NRIC 1981	347	38,35	
Q033T4	Q033T4_LACC3	Aryl-alcohol dehydrogenase related enzyme	LSEI_2825	Lactobacillus casei (strain ATCC 334)	309	34,038	
A0A0R2CDT7	A0A0R2CDT7_9LACO	Aryl-alcohol dehydrogenase related enzyme	FC80_GL001739	Lactobacillus cacaonum DSM 21116	306	33,782	
A0A0R2CLK3	A0A0R2CLK3_9LACO	Aryl-alcohol dehydrogenase	FC80_GL000355	Lactobacillus cacaonum DSM 21116	372	39,776	
A0A0R2H1X8	A0A0R2H1X8_WEIVI	Aldehyde-alcohol dehydrogenase	IV50_GL000632	Weissella viridescens (Lactobacillus viridescens)	898	97,675	
A0A0R2H7A4	A0A0R2H7A4_WEIVI	Alcohol dehydrogenase zinc-binding domain-containing protein	IV50_GL001254	Weissella viridescens (Lactobacillus viridescens)	329	34,233	
A0A0R2H0A3	A0A0R2H0A3_WEIVI	Ethanol-active dehydrogenase acetaldehyde-active reductase	IV50_GL001309	Weissella viridescens (Lactobacillus viridescens)	349	37,346	
A0A0R2CKB9	A0A0R2CKB9_9LACO	Alcohol dehydrogenase	FC80_GL000258	Lactobacillus cacaonum DSM 21116	345	37,221	
A0A0R2H379	A0A0R2H379_WEIVI	Short-chain alcohol dehydrogenase	IV50_GL000106	Weissella viridescens (Lactobacillus viridescens)	243	26,821	
